# Supplementary material for: Identification and Validation of Novel Cerebrospinal Fluid Biomarkers for Staging Early Alzheimer's Disease
Source: PLoS One. 2011 Jan 12;6(1):e16032. doi: 10.1371/journal.pone.0016032 (PMC3020224; doi:10.1371/journal.pone.0016032)
Supplement: Table S1 — Mass spectrometry and protein identification data for 2D-DIGE gel features that differ in AD CSF. Results are ordered sequentially by “heat map #” [column A], corresponding to the ‘heat map’ row numbers in Figure 2. “Spot” [column B] refers to BVA number (see Methods). “(Accession) primary protein name” [column C] provides the gi number and protein name from the NCBI database. “Protein molecular weight” [column D] is the gene product molecular weight in Daltons. “Protein score” [column E] is the MASCOT-generated protein score. “Protein ID probability” [column F] indicates Scaffold's percent probability that the protein identification is correct. “Spectral count” [column G] is the number of spectra assigned to the protein by Scaffold. “Unique proteins” [column H] refers to the number of recognized tryptic peptides attributed to the protein by MASCOT. “Peptide sequence” [column I] indicates the amino acid sequence of the tryptic peptide predicted by MASCOT. “MASCOT ion score” [column J] is the MASCOT quality assessment of the peptide sequence assignment. “M/Z (observed)” [column K] is mass/charge ratio. “Mass (observed)” [column L] of peptide is indicated in Daltons. “Mass (theoretical)” [column M] is idealized tryptic peptide mass as predicted by NCBI. “Mass error (ppm)” [column N] is the error in parts per million determined through comparison of theoretical peptide mass to data generated by mass spectrometry. “MS source” [column O] reflects the mass spectrometer that produced the observed data (Q-STAR or LTQ-FT). “Modifications” [column P] lists variable post-translational modifications identified by mass spectrometry peptide sequence analysis. (XLS) [file pone.0016032.s002.xls]

## Sheet: Sheet1
			Supplemental Table x. Mass Spectrometry and Database Search Results
			Database: nr_20070218 20070218 (4641100 sequences; 1602026208 residues)
			Database searching: Mascot Distiller (no spectra combining); Mascot version 2.2.04
			Protein Identification/ Spectral counting Quantification: Scaffold Proteome Software version 2.06.02
Heatmap #	Spot	(Accession) Primary Protein Name	Protein Molecular Weight	Protein Score	Protein Identification Probability	Spectral Count	Unique Peptides	Peptide Sequence	Mascot Ion Score	m/z (observed)	Mass (observed)	Mass (theoretical)	Mass Error (ppm)	Modifications
1	4709	hypothetical protein LOC146556 [Homo sapiens], gi|22761204|dbj|BAC11494.1| unnamed protein product [Homo sapiens]	48767.7	88	92	1	1	ATIADLILSALER	88	693.449	1384.88	1384.79	65.425
2	5659	1: gi|4502807 chromogranin B precursor [Homo sapiens] 2: gi|5834566 chromogranin B (secretogranin 1) [Homo sapiens] 3: gi|62089004 chromogranin B precursor variant [Homo sapiens]	78199.2	76	100	3	2	ELENLAAMDLELQK	65	808.997	1615.98	1615.81	103.252	"(gi|5834566) (gi|62089004)
3	4683	1: gi|4502101 annexin I [Homo sapiens]	38690	283	100	8	9	GTDVNVFNTILTTR	101	775.96	1549.9	1549.81	61.0694	"
								TPAQFDADELR	90	631.839	1261.66	1261.59	54.6016
								GVDEATIIDILTK	89	694.441	1386.87	1386.76	76.4674
								TPAQFDADELR	55	631.837	1261.66	1261.59	51.3279
								GVDEATIIDILTKR	46	515.333	1542.98	1542.86	74.7591
								KGTDVNVFNTILTTR	45	560.347	1678.02	1677.9	67.2249
								DLAKDITSDTSGDFR	42	547.641	1639.9	1639.77	80.3924
								AMVSEFLK	40	491.78	981.546	981.484	62.6724	Acetyl (N-term); Oxidation (M)
								RKGTDVNVFNTILTTR	35	612.387	1834.14	1834.01	72.6633
4	4608	1:gi|4502807 chromogranin B precursor [Homo sapiens] 2: gi|5834566 chromogranin B (secretogranin 1) [Homo sapiens]	78199	259	100	4		VAQLDQLLHYR	57	452.59	1354.75	1354.74	9.22689
								ADQTVLTEDEKK	42	459.57	1375.69	1375.68	3.70725
								DPADASEAHESSSR	68	486.87	1457.59	1457.6	-9.399
								GEAGAPGEEDIQGPTK	86	778.37	1554.73	1554.72	5.9818
4	4608	1: gi|62089004 chromogranin B precursor variant [Homo sapiens]	81555	258				DPADATEAHESSSR	67	491.5500	1471.6282	1471.6175	#VALUE!
4	4608	1:gi|134464 Secretogranin-2 precursor (Secretogranin II) (SgII) (Chromogranin C) 2: gi|18490917 Secretogranin II (chromogranin C) [Homo sapiens] 3: gi|68160947 secretogranin II precursor [Homo sapiens]	70825	146	100	2		LENVQK	19	365.71	729.4054	729.4021	#VALUE!
								ALEYIENLR	68	560.8	1119.59	1119.59	-6.25228
								QAENEPQSAPK	50	599.79	1197.57	1197.56	2.42159
5	4297	1: gi|4502807 chromogranin B precursor [Homo sapiens] 2: gi|5834566 chromogranin B (secretogranin 1) [Homo sapiens] 3: gi|62089004 chromogranin B precursor variant [Homo sapiens]	78199	64	99	2	2	ELENLAAMDLELQK	64	808.985	1615.95	1615.81	88.0052
								ADQTVLTEDEKKELENLAAMDLELQK		744.432	2973.7	2973.49	71.3977
								ADQTVLTEDEKKELENLAAMDLELQK		748.441	2989.73	2989.48	84.8977
6	4545	no data
7	4695	no data
8	4044	1: gi|4502807 chromogranin B precursor [Homo sapiens] 2: gi|5834566 chromogranin B (secretogranin 1) [Homo sapiens] 3: gi|62089004 chromogranin B precursor variant [Homo sapiens]	78199.2	71	95	1	1	ELENLAAMDLELQK	72	808.963	1615.91	1615.81	60.5516	"(gi|5834566) (gi|62089004)
9	1314	1: gi|1621283 hBRAVO/Nr-CAM precursor	143194	459	100	16	16	SVQLSWTPGDDNNSPITK	76	653.698	1958.07	1957.94	68.5032	"
								TLQIIHVSEADSGNYQCIAK	76	749.75	2246.23	2246.1	57.4925	Carbamidomethyl (C)
								DSTGTYTCVAR	75	615.809	1229.6	1229.53	55.2217	Carbamidomethyl (C)
								SLPSEASEQYLTK	74	726.893	1451.77	1451.71	39.2646
								YIVSGTPTFVPYLIK	63	849.517	1697.02	1696.94	44.4157
								KIDGDTIIFSNVQER	62	579.008	1734	1733.89	62.2841
								LLEDLVQPPTITQQSPK	54	636.386	1906.14	1906.04	49.9968
								HDHTLSLTVLWLK	52	521.657	1561.95	1561.86	56.0799
								VKHDHTLSLTVLWLK	50	597.387	1789.14	1789.03	64.3513
								AAPYWITAPQNLVLSPGEDGTLICR	49	914.857	2741.55	2741.38	60.1831	Carbamidomethyl (C)
								ENIVIQCEAK	46	602.33	1202.64	1202.6	40.2055	Carbamidomethyl (C)
								ISWLTNGVPIEIAPDDPSR	44	694.066	2079.18	2079.06	54.69
								LSPYVNYSFR	41	623.351	1244.69	1244.62	55.1325
								DYIIDPR	39	446.253	890.492	890.45	47.0998
								GNVLSLECIAEGLPTPIIYWAK	32	815.488	2443.44	2443.28	66.118	Carbamidomethyl (C)
								DATWIVK	31	416.758	831.501	831.449	62.0459
9	1314	1: gi|51095143 neuronal cell adhesion molecule [Homo sapiens]	130938	450	100	7	16	SVQLSWTPGDDNNSPITK	76	653.698	1958.07	1957.94	68.5032	"
								TLQIIHVSEADSGNYQCIAK	76	749.75	2246.23	2246.1	57.4925	Carbamidomethyl (C)
								DSTGTYTCVAR	75	615.809	1229.6	1229.53	55.2217	Carbamidomethyl (C)
								SLPSEASEQYLTK	74	726.893	1451.77	1451.71	39.2646
								YIVSGTPTFVPYLIK	63	849.517	1697.02	1696.94	44.4157
								KIDGDTIIFSNVQER	62	579.008	1734	1733.89	62.2841
								HDHTLSLTVLWLK	52	521.657	1561.95	1561.86	56.0799
								VKHDHTLSLTVLWLK	50	597.387	1789.14	1789.03	64.3513
								AAPYWITAPQNLVLSPGEDGTLICR	49	914.857	2741.55	2741.38	60.1831	Carbamidomethyl (C)
								ENIVIQCEAK	46	602.33	1202.64	1202.6	40.2055	Carbamidomethyl (C)
								ISWLTNGVPIEIAPDDPSR	44	694.066	2079.18	2079.06	54.69
								LSPYVNYSFR	41	623.351	1244.69	1244.62	55.1325
								NEVHLEIKDATWIVK	41	599.032	1794.07	1793.97	58.8734
								DYIIDPR	39	446.253	890.492	890.45	47.0998
								GNVLSLECIAEGLPTPIIYWAK	32	815.488	2443.44	2443.28	66.118	Carbamidomethyl (C)
								DATWIVK	31	416.758	831.501	831.449	62.0459
9	1314	1: gi|1483187 inter-alpha-trypsin inhibitor family heavy chain-related protein (IHRP) [Homo sapiens] 2: gi|4096840 inter-alpha-trypsin inhibitor family heavy chain-related protein [Homo sapiens] 3: gi|31542984 inter-alpha (globulin) inhibitor H4 [Homo sapiens]	103321	152	100	7	7	LGVYELLLK	53	524.356	1046.7	1046.64	57.7956	"(gi|4096840) (gi|31542984)
								FSSHVGGTLGQFYQEVLWGSPAASDDGRR	53	781.919	3123.65	3123.48	53.6914
								ITFELVYEELLKR	51	551.682	1652.02	1651.92	64.4112
								QLGLPGPPDVPDHAAYHPFRR	43	585.835	2339.31	2339.19	51.3716
								QLGLPGPPDVPDHAAYHPFR	38	546.813	2183.22	2183.09	59.9723
								AGFSWIEVTFK	36	642.874	1283.73	1283.65	60.5988
								QGPVNLLSDPEQGVEVTGQYER	34	805.774	2414.3	2414.17	53.0381
9	1314	1: gi|5453766 nel-like 2 [Homo sapiens] 2: gi|13874433 cerebral protein-12 [Homo sapiens]	91284.5	52	100	3	3	AFLFQDTPR	47	547.821	1093.63	1093.56	66.003	"(gi|13874433)
								LSLAISASHLILHIDCNK	32	669.068	2004.18	2004.08	49.968	Carbamidomethyl (C)
10	1320	1: gi|1621283 hBRAVO/Nr-CAM precursor	143194	376	100	12	12	SLPSEASEQYLTK	74	726.898	1451.78	1451.71	45.6929	"
								SVQLSWTPGDDNNSPITK	72	653.698	1958.07	1957.94	68.3546
								TLQIIHVSEADSGNYQCIAK	66	749.758	2246.25	2246.1	67.1813	Carbamidomethyl (C)
								ISWLTNGVPIEIAPDDPSR	66	694.066	2079.18	2079.06	54.589
								KIDGDTIIFSNVQER	66	579.016	1734.03	1733.89	75.1707
								YIVSGTPTFVPYLIK	60	849.524	1697.03	1696.94	53.2823
								AAPYWITAPQNLVLSPGEDGTLICR	53	914.851	2741.53	2741.38	53.9038	Carbamidomethyl (C)
								VKHDHTLSLTVLWLK	50	597.388	1789.14	1789.03	65.1126
								LLEDLVQPPTITQQSPK	48	636.387	1906.14	1906.04	52.0666
								LSPYVNYSFR	40	623.353	1244.69	1244.62	57.6104
								HDHTLSLTVLWLK	34	521.662	1561.96	1561.86	65.9681
								GNVLSLECIAEGLPTPIIYWAK	31	815.488	2443.44	2443.28	65.1554	Carbamidomethyl (C)
10	1320	1: gi|1483187 inter-alpha-trypsin inhibitor family heavy chain-related protein (IHRP) [Homo sapiens] 2: gi|4096840 inter-alpha-trypsin inhibitor family heavy chain-related protein [Homo sapiens] 3: gi|31542984 inter-alpha (globulin) inhibitor H4 [Homo sapiens]	103321	93	100	3	3	ITFELVYEELLKR	57	551.68	1652.02	1651.92	61.0315	"(gi|4096840) (gi|31542984)
								LGVYELLLK	55	524.356	1046.7	1046.64	57.2471
10	1320	1: gi|11360175 hypothetical protein DKFZp547E212.1 - human (fragment) 2: gi|29791402 TMEM132A protein [Homo sapiens] 3: gi|29791405 TMEM132A protein [Homo sapiens] 4: gi|30089935 transmembrane protein 132A isoform a [Homo sapiens] 5: gi|30089937 transmembrane protein 132A isoform b [Homo sapiens]	40680.1	81	100	2	2	AEELVNTAPLTGVPQHVPVR	58	709.764	2126.27	2126.15	57.5896	"(gi|29791402) (gi|29791405) (gi|30089935) (gi|30089937)
								LTVWAPLLPLR	50	639.943	1277.87	1277.79	66.2537
10	1320	1: gi|5453766 nel-like 2 [Homo sapiens] 2: gi|13874433 cerebral protein-12 [Homo sapiens]	91284.5	73	100	2	2	AFLFQDTPR	53	547.825	1093.64	1093.56	73.7137	"(gi|13874433)
								VVEKPSTDLPLGTTFWLGQR	46	748.789	2243.34	2243.19	66.5653
11	1382	1: gi|6651381 NgCAM-related related cell adhesion molecule /alternative carboxyl terminus [Homo sapiens] 2: gi|33112413 Neuronal cell adhesion molecule precursor (Nr-CAM) (NgCAM-related cell adhesion molecule) (Ng-CAM-r 3: gi|6651380 NgCAM-related related cell adhesion molecule [Homo sapiens]	136528	75	100	6	6	KIDGDTIIFSNVQER	42	579.044	1734.11	1733.89	124.809	"(gi|33112413) (gi|6651380)
								NEVHLEIK	40	491.321	980.627	980.529	100.076
								ENIVIQCEAK	39	602.367	1202.72	1202.6	102.175	Carbamidomethyl (C)
								LSPYVNYSFR	39	623.368	1244.72	1244.62	82.3618
								AETYEGVYQCTAR	35	774.403	1546.79	1546.67	76.8262	Carbamidomethyl (C)
								NALGAIHHTISVR	35	463.646	1387.92	1387.77	106.307
11	1382	1: gi|178849 apolipoprotein E 2: gi|178853 apolipoprotein E 3: gi|364011 apolipoprotein E mutant E3K 4: gi|4557325 apolipoprotein E precursor [Homo sapiens]	36187.8	69	100	4	4	SELEEQLTPVAEETR	47	866.02	1730.03	1729.84	109.154	"(gi|178853) (gi|364011) (gi|4557325)
								AATVGSLAGQPLQER	47	749.462	1496.91	1496.79	77.366
								LGPLVEQGR	42	484.842	967.67	967.545	129.233
								LQAEAFQAR	40	517.315	1032.62	1032.54	78.4128
11	1382	1: gi|229752 Chain B, Alpha-Ferrous-Carbonmonoxy, Beta-Cobaltous-Deoxy Hemoglobin (T State) 2: gi|442751 Chain B, Hemoglobin Ypsilanti (Carbon Monoxy Form) 3: gi|1942682 Chain B, Deoxy (Beta-(C93a,C112g)) Human Hemoglobin 4: gi|1942686 Chain B, (Alpha-Oxy, Beta-(C112g)deoxy) T-State Human Hemoglobin 5: gi|3660145 Chain B, Crystal Structure Of S-Nitroso-Nitrosyl Human Hemoglobin A 6: gi|4378804 he…	15857.2	56	99	2	3	LLVVYPWTQR	38	637.929	1273.84	1273.72	97.94	"(gi|442751) (gi|1942682) (gi|1942686) (gi|3660145) (gi|4378804) (gi|4504349) (gi|6003534) (gi|18418633) (gi|61679604)
								VNVDEVGGEALGR	37	657.894	1313.77	1313.66	88.8519
								VLGAFSDGLAHLDNLK	34	557.361	1669.06	1668.88	106.61
11	1382	1: gi|66473265 beta globin chain [Homo sapiens]	11479.8	56	99	2	3	LLVVYPWTKR	38	637.929	1273.84	1273.75	69.3784	"
								VNVDEVGGEALGR	37	657.894	1313.77	1313.66	88.8519
								VLGAFSDGLAHLDNLK	34	557.361	1669.06	1668.88	106.61
11	1382	1: gi|29446 unnamed protein product [Homo sapiens]	15956.2	56	99	2	3	LLVVYPWTQR	38	637.929	1273.84	1273.72	97.94	"
								VNVDEVGGEALGR	37	657.894	1313.77	1313.66	88.8519
								VLGAFSDGLAHLDNLK	34	557.361	1669.06	1668.88	106.61
12	1383	1: gi|6651381 NgCAM-related related cell adhesion molecule /alternative carboxyl terminus [Homo sapiens] 2: gi|1621283 hBRAVO/Nr-CAM precursor 3: gi|6651380 NgCAM-related related cell adhesion molecule [Homo sapiens] 4: gi|33112413 Neuronal cell adhesion molecule precursor (Nr-CAM) (NgCAM-related cell adhesion molecule) (Ng-CAM-r	136528	85	100	5	4	SLPSEASEQYLTK	46	726.941	1451.87	1451.71	105.82	"(gi|1621283) (gi|6651380) (gi|33112413)
								NALGAIHHTISVR	46	463.644	1387.91	1387.77	101.869
								KIDGDTIIFSNVQER	42	579.024	1734.05	1733.89	89.6958
								LLEDLVQPPTITQQSPK	36	636.441	1906.3	1906.04	135.879
13	4033	1: gi|4502807 chromogranin B precursor [Homo sapiens] 2: gi|5834566 chromogranin B (secretogranin 1) [Homo sapiens] 3: gi|62089004 chromogranin B precursor variant [Homo sapiens]	78199.2	87	100	2	2	ELENLAAMDLELQK	70	808.967	1615.92	1615.81	66.1426	"(gi|5834566) (gi|62089004)
								SAEFPDFYDSEEPVSTHQEAENEKDR	46	764.88	3055.49	3055.3	63.5696
14	4191	1: gi|4502807 chromogranin B precursor [Homo sapiens] 2: gi|5834566 chromogranin B (secretogranin 1) [Homo sapiens] 3: gi|62089004 chromogranin B precursor variant [Homo sapiens]	78199.2	99	100	3	2	ELENLAAMDLELQK	76	808.973	1615.93	1615.81	73.381	"(gi|5834566) (gi|62089004)
								SAEFPDFYDSEEPVSTHQEAENEKDR	42	764.897	3055.56	3055.3	86.1259
15	4293	1: gi|4502807 chromogranin B precursor [Homo sapiens] 2: gi|5834566 chromogranin B (secretogranin 1) [Homo sapiens] 3: gi|62089004 chromogranin B precursor variant [Homo sapiens]	78199.2	63	95	1	1	ELENLAAMDLELQK	64	808.997	1615.98	1615.81	103.269	"(gi|5834566) (gi|62089004)
16	4266	1: gi|62089004 chromogranin B precursor variant [Homo sapiens]	81554.9	69	100	4	2	GYPGVQGPEDLEWER	63	866.461	1730.91	1730.79	67.9135	"
								ELENLAAMDLELQK	38	808.967	1615.92	1615.81	65.9198
17	4615	no data
18	4677	no data
19	4906	no data
20	5014	1: gi|443295 Chain A, Transthyretin (Formerly Prealbumin) 2: gi|2098255 Chain A, Tertiary Structures Of Three Amyloidogenic Transthyretin Variants And Implications For Amy 3: gi|2098257 Chain A, Tertiary Structures Of Three Amyloidogenic Transthyretin Variants And Implications For Amy 4: gi|3891560 Chain A, Tertiary Structures Of Three Amyloidogenic Transthyretin Variants And Implications For Amy…	13752.9	311	100	10	8	RYTIAALLSPYSYSTTAVVTNPKE	81	882.524	2644.55	2644.37	66.677	"(gi|2098255) (gi|2098257) (gi|3891560) (gi|4507725) (gi|62738386) (gi|73535906) (gi|55669575)
								YTIAALLSPYSYSTTAVVTNPK	79	787.476	2359.4	2359.23	73.6159
								TSESGELHGLTTEEEFVEGIYK	57	819.111	2454.31	2454.14	68.5966
								YTIAALLSPYSYSTTAVVTNPKE	57	830.497	2488.47	2488.27	79.0833
								AADDTWEPFASGK	51	697.87	1393.73	1393.61	79.7473
								TSESGELHGLTTEEEFVEGIYKVEIDTK	47	785.952	3139.78	3139.51	86.7063
								GSPAINVAVHVFRK	47	498.989	1493.95	1493.85	66.395
								GSPAINVAVHVFR	41	456.298	1365.87	1365.75	87.2062
21	4884	gi|5454032 S100 calcium binding protein A1 [Homo sapiens]	10539	169			5	DVDAVDKVMK	19.72	379.19	1134.56	1134.55	9.51921	Oxidation (M)
								DVDAVDKVMK	29.21	568.29	1134.56	1134.57	-5.64093	Oxidation (M)
								ELLQTELSGFLDAQK	66.56	564.63	1690.88	1690.87	5.61842
								ELLQTELSGFLDAQK	55.63	846.45	1690.88	1690.89	-4.55383
								GSELETAMETLINVFHAHSGK	72.91	777.05	2328.11	2328.13	-9.75032	Acetyl (N-term); Oxidation (M)
21	4884	gi|28590 unnamed protein product [Homo sapiens]	69250	162			5	LVTDLTK	52.19	395.24	788.464	788.465	-1.26829
								YLYEIAR	36.66	464.25	926.486	926.485	0.755543
								CCTESLVNR	41.99	569.75	1137.49	1137.49	4.6594	2 Carbamidomethyl (C)
								YICENQDSISSK	25.1	722.33	1442.63	1442.65	-7.41693	Carbamidomethyl (C)
								ECCEKPLLEKSHCIAEVENDEMPADLPSLAADFVESK	5.92	1396.97	4187.9	4187.89	3.91605	Acetyl (N-term); Carbamidomethyl (C)
21	4884	gi|178741 apolipoprotein C-II	10177	121			2	TYLPAVDEK	43.93	518.27	1034.53	1034.53	2.89988
								TAAQNLYEK	77.01	519.27	1036.52	1036.53	-6.27095
21	4884	gi|62898141 prosaposin (variant Gaucher disease and variant metachromatic leukodystrophy) variant [Homo sapiens	58102	115			5	LVGYLDR	42.46	418.24	834.46	834.465	-6.59105
								QEILAALEK	55.91	499.28	996.549	996.545	3.71283	Pyro-glu (N-term Q)
								QEILAALEK	54.44	507.8	1013.58	1013.59	-9.56999
								DNGDVCQDCIR	8	427.17	1278.5	1278.49	6.80491	Acetyl (N-term)
								EVTKLIDNNKTEK	8.28	525.29	1572.84	1572.85	-7.88379	Acetyl (N-term)
21	4884	gi|7019519 proprotein convertase subtilisin/kexin type 1 inhibitor precursor [Homo sapiens]	27356	105			1	ILAGSADSEGVAAPR	105.02	707.37	1412.73	1412.73	0.353926
21	4884	gi|17136078 VGF nerve growth factor inducible precursor [Homo sapiens]	67218	99			3	QAAAQEER	47.34	443.21	884.399	884.405	-7.46264	Pyro-glu (N-term Q)
								QAAAQEER	28.08	451.72	901.425	901.425	-0.110935
								GLQEAAEER	51.87	501.75	1001.48	1001.49	-7.68858
21	4884	gi|20149993 Chain A, Structure Of Human Trypsin Iv (Brain Trypsin)	24262	97			1	VLEGNEQFINAVK	97.31	730.89	1459.77	1459.77	1.09607
21	4884	gi|619383 apolipoprotein D, apoD [human, plasma, Peptide, 246 aa]	27975	89			2	SPELQAEAK	76.94	486.75	971.492	971.485	7.10253
								VKSPELQAEAK	12.04	600.34	1198.66	1198.67	-8.09233
21	4884	gi|404390 beta-trace protein, prostaglandin D synthase, PGD synthase {EC 5.3.99.2} [human, cerebrospinal flui	18670	72			2	GPGEDFR	40.81	389.18	776.345	776.345	-0.128809
								MATLYSR	31.29	429.21	856.411	856.405	6.88926	Oxidation (M)
21	4884	gi|627391 brain-associated small cell lung cancer antigen - human (fragment)	1908	70			2	LQVDIVPSQGEISVGESK	44.48	629	1883.98	1883.98	3.02551
								LQVDIVPSQGEISVGESK	70.05	943	1883.98	1883.99	-0.796185
21	4884	gi|134464 Secretogranin-2 precursor (Secretogranin II) (SgII) (Chromogranin C) [Contains: Secretoneurin (SN)]	70825	59			1	IESQTQEEVR	58.75	609.8	1217.59	1217.59	2.79241
21	4884	gi|6808151 hypothetical protein [Homo sapiens]	36442	54			2	ALHPEEDPEGR	45.83	417.2	1248.57	1248.58	-3.84437
								ALHPEEDPEGR	54.46	625.3	1248.57	1248.59	-9.61088
21	4884	gi|1439613 neural cell adhesion molecule CD56; N-CAM [Homo sapiens]	93464	51			1	DKDISWFSPNGEK	51	508.24	1521.71	1521.7	7.68878
22	3423	1: gi|178855 apolipoprotein J precursor 2: gi|180620 complement cytolysis inhibitor precursor 3: gi|338057 sulfated glycoprotein-2 4: gi|338305 'SP40,40' 5: gi|27373753 apolipoprotein J [Homo sapiens] 6: gi|32891795 clusterin (complement lysis inhibitor, SP-40,40, sulfated glycoprotein 2, testosterone-repressed pr 7: gi|42716297 clusterin isoform 1 [Homo sapiens] 8: gi|42740907 clusterin isoform …	48772.1	62	95	1	1	ELDESLQVAER	62	644.862	1287.71	1287.63	61.0058	"(gi|180620) (gi|338057) (gi|338305) (gi|27373753) (gi|32891795) (gi|42716297) (gi|42740907) (gi|57997569)
23	3470	1: gi|338284 extracellular-superoxide dismutase (EC 1.15.1.1) 2: gi|114593356 PREDICTED: similar to superoxide dismutase 3, extracellular isoform 3 [Pan troglodytes]	25864.7	54	99	2	2	AGLAASLAGPHSIVGR	54	492.987	1475.94	1475.82	79.5503	"(gi|114593356)
								VTGVVLFR	33	445.811	889.607	889.538	77.2277
23	3470	gi|17402888 neuronal pentraxin receptor [Homo sapiens]	52813	71			2	VAQLPLSLK	41.19	484.844	967.607	967.672	-67.9982
								VAELEHGSSAYSPPDAFK	29.93	635.672	1903.9	1903.99	-51.2607
24	4954	1) gi|34616 beta-2 microglobulin [Homo sapiens]	12791	46		1	1	SNFLNCYVSGFHPSDIEVDLLK	46	852.133	2553.38	2553.22	61.0601	Carbamidomethyl (C)
25	3436	1) gi|39654998 Chain A, Hr1b Domain From Prk1	9054	77	92	2	2	DIPATNLSR	35	514.33	1026.64	1027.53	-861.581	Acetyl (N-term)
								MIPATNLSR	31	522.841	1043.67	1043.54	119.305	Acetyl (N-term)
26	3714	no data
27	4922	1: go|39654998 Chain A, Hr1b Domain From Prk1	9054	48	79	1	1	MIPATNLSR	41	522.824	1043.63	1043.54	86.4363	Acetyl (N-term)
28	3786	1: gi|2072129 chromogranin A	50718	19	80	1	1	RPEDQELESLSAIEAELEK	19	729.418	2185.23	2185.07	71.7138
29	4076	1: gi|7341255 brain acetylcholinesterase putative membrane anchor [Homo sapiens] 2:gi|7706244 cutA divalent cation tolerance homolog isoform 2 [Homo sapiens] 3:gi|565545579 Chain A, Divalent Cation Tolerant Protein Cuta From Homo Sapiens O60888 4: gi|62198241 cutA divalent cation tolerance homolog isoform 1 [Homo sapiens] 5:gi|62526026 cutA divalent cation tolerance homolog isoform 3 [Homo sapien…	14654	84				TQSSLVPALTDFVR	65	767.42	1532.83	1532.82	3.6534
								GKIEEDSEVLMMIK	10	541.28	1620.82	1620.81	4.9358
								GKIEEDSEVLMMIK	19	551.94	1652.8	1652.8	-1.08906
30	4111	1: gi|62089004 chromogranin B precursor variant [Homo sapiens]	81554.9	149	100	3	3	GYPGVQGPEDLEWER	80	866.444	1730.87	1730.79	48.5108	"
								ELENLAAMDLELQK	60	808.977	1615.94	1615.81	78.9163
								SAEFPDFYDSEEPVSTHQEAENEKDR	60	764.891	3055.53	3055.3	77.9224
31	4167	1: gi|4502807 chromogranin B precursor [Homo sapiens] 2: gi|5834566 chromogranin B (secretogranin 1) [Homo sapiens] 3: gi|62089004 chromogranin B precursor variant [Homo sapiens]	78199.2	85	95	1	1	ELENLAAMDLELQK	85	808.977	1615.94	1615.81	79.0686	"(gi|5834566) (gi|62089004)
32	2652	1: gi|28373309 Chain G, Gelsolin G4-G6ACTIN COMPLEX 2: gi|38492768 Chain A, The Calcium-Activated C-Terminal Half Of Gelsolin 3: gi|4504165 gelsolin isoform a precursor [Homo sapiens] 4: gi|38044288 gelsolin isoform b [Homo sapiens]	36347.2	51	100	5	3	AGALNSNDAFVLK	50	660.384	1318.75	1318.69	49.0814	"(gi|38492768) (gi|4504165) (gi|38044288)
								TGAQELLR	43	444.29	886.566	886.487	89.0458
33	1313	1: gi|1621283 hBRAVO/Nr-CAM precursor	143194	348	100	12	12	SLPSEASEQYLTK	93	726.898	1451.78	1451.71	45.6708	"
								SVQLSWTPGDDNNSPITK	67	653.696	1958.07	1957.94	64.8442
								TLQIIHVSEADSGNYQCIAK	63	749.753	2246.24	2246.1	60.3762	Carbamidomethyl (C)
								LLEDLVQPPTITQQSPK	55	636.387	1906.14	1906.04	50.7964
								KIDGDTIIFSNVQER	55	579.006	1733.99	1733.89	57.7405
								AAPYWITAPQNLVLSPGEDGTLICR	53	914.851	2741.53	2741.38	52.955	Carbamidomethyl (C)
								LSPYVNYSFR	53	623.361	1244.71	1244.62	70.5686
								YIVSGTPTFVPYLIK	50	849.523	1697.03	1696.94	50.9805
								VKHDHTLSLTVLWLK	42	597.385	1789.13	1789.03	59.775
								DSTGTYTCVAR	31	615.818	1229.62	1229.53	70.3136	Carbamidomethyl (C)
33	1313	1: gi|1483187 inter-alpha-trypsin inhibitor family heavy chain-related protein (IHRP) [Homo sapiens] 2: gi|4096840 inter-alpha-trypsin inhibitor family heavy chain-related protein [Homo sapiens] 3: gi|31542984 inter-alpha (globulin) inhibitor H4 [Homo sapiens]	103321	145	100	7	5	QGPVNLLSDPEQGVEVTGQYER	56	805.78	2414.32	2414.17	61.1862	"(gi|4096840) (gi|31542984)
								ITFELVYEELLKR	54	551.682	1652.02	1651.92	63.3542
								GPDVLTATVSGK	53	572.84	1143.66	1143.61	44.8683
								LGVYELLLK	47	524.356	1046.7	1046.64	58.0038
								QLGLPGPPDVPDHAAYHPFR	40	546.815	2183.23	2183.09	64.76
33	1313	1: gi|2511666 NrCAM protein [Homo sapiens] 2: gi|6651381 NgCAM-related related cell adhesion molecule /alternative carboxyl terminus [Homo sapiens] 3: gi|6651380 NgCAM-related related cell adhesion molecule [Homo sapiens] 4: gi|33112413 Neuronal cell adhesion molecule precursor (Nr-CAM) (NgCAM-related cell adhesion molecule) (Ng-CAM-r	143283	88	100	4	4	KIDGDTIIFSNVQER	65	579.008	1734	1733.89	62.3239	"(gi|6651381) (gi|6651380) (gi|33112413)
								SLPSEASEQYLTK	50	726.933	1451.85	1451.71	93.8484
								LSPYVNYSFR	35	623.357	1244.7	1244.62	63.9818
								NEVHLEIK	32	491.295	980.575	980.529	46.9022
33	1313	1: gi|51095143 neuronal cell adhesion molecule [Homo sapiens] 2: gi|68534652 NRCAM protein [Homo sapiens]	130938	229	100	9	9	LSPYVNYSFR	69	623.32	1244.63	1244.62	5.23935	"(gi|68534652)
								SLPSEASEQYLTK	58	726.87	1451.73	1451.71	7.64131
								QPEYAVVQR	55	545.29	1088.57	1088.56	3.70305
								NALGAIHHTISVR	54	463.6	1387.78	1387.77	7.05089
								GAAVSNNIVVRPSR	53	480.61	1438.81	1438.8	5.41215
								ENIVIQCEAK	46	602.31	1202.61	1202.6	7.45637	Carbamidomethyl (C)
								DSTGTYTCVAR	45	615.78	1229.55	1229.53	8.79276	Carbamidomethyl (C)
								LPQSER	42	365.2	728.385	728.382	5.16899
								NEVHLEIK	41	491.27	980.525	980.529	-3.67659
33	1313	1: gi|1483187 inter-alpha-trypsin inhibitor family heavy chain-related protein (IHRP) [Homo sapiens] 2: gi|4096840 inter-alpha-trypsin inhibitor family heavy chain-related protein [Homo sapiens] 3: gi|31542984 inter-alpha (globulin) inhibitor H4 [Homo sapiens]	103321	119	100	7	3	LGVYELLLK	53	524.33	1046.65	1046.64	7.56805	"(gi|4096840) (gi|31542984)
								ANTVQEATFQMELPK	43	861.93	1721.85	1721.83	9.32555	Oxidation (M)
								VQGNDHSATR	43	542.76	1083.51	1083.51	-0.239039
33	1313	1: gi|5453766 nel-like 2 [Homo sapiens] 2: gi|13874433 cerebral protein-12 [Homo sapiens]	91284.5	79	100	2	2	IMELQDILAK	59	595.33	1188.65	1188.64	2.5811	Oxidation (M)"(gi|13874433)
								ASTATAEQFFQK	45	664.83	1327.65	1327.64	3.50622
34	1372	1: gi|1942284 Chain , X-Ray Crystal Structure Of Human Ceruloplasmin At 3.0 Angstroms 2: gi|1620909 ceruloplasmin [Homo sapiens] 3: gi|4557485 ceruloplasmin precursor [Homo sapiens]	120009	156	100	9	7	QSEDSTFYLGER	76	716.376	1430.74	1430.63	74.7195	"(gi|1620909) (gi|4557485)
								EVGPTNADPVCLAK	52	735.927	1469.84	1469.72	82.8308	Carbamidomethyl (C)
								LISVDTEHSNIYLQNGPDR	39	724.421	2170.24	2170.07	80.5593
								GAYPLSIEPIGVR	38	686.44	1370.87	1370.76	80.3316
								KAEEEHLGILGPQLHADVGDKVK	34	621.7	2482.77	2482.32	182.495
								MFTTAPDQVDKEDEDFQESNK	32	830.766	2489.28	2489.05	89.7944	Oxidation (M)
								QYTDSTFRVPVER	31	533.319	1596.94	1596.79	91.6921
34	1372	1: gi|31874098 hypothetical protein [Homo sapiens] 2: gi|51095143 neuronal cell adhesion molecule [Homo sapiens] 3: gi|1621283 hBRAVO/Nr-CAM precursor 4: gi|6651381 NgCAM-related related cell adhesion molecule /alternative carboxyl terminus [Homo sapiens] 5: gi|6651380 NgCAM-related related cell adhesion molecule [Homo sapiens] 6: gi|33112413 Neuronal cell adhesion molecule precursor (Nr-CAM) (Ng…	130960	79	100	4	4	SLPSEASEQYLTK	54	726.921	1451.83	1451.71	77.8273	"(gi|51095143) (gi|1621283) (gi|6651381) (gi|6651380) (gi|33112413)
								KIDGDTIIFSNVQER	42	579.024	1734.05	1733.89	89.1334
								NALGAIHHTISVR	40	463.633	1387.88	1387.77	78.4101
34	1372	1: gi|1483187 inter-alpha-trypsin inhibitor family heavy chain-related protein (IHRP) [Homo sapiens] 2: gi|4096840 inter-alpha-trypsin inhibitor family heavy chain-related protein [Homo sapiens] 3: gi|31542984 inter-alpha (globulin) inhibitor H4 [Homo sapiens]	103321	69	100	6	5	LALDNGGLAR	51	500.303	998.592	998.551	40.8953	"(gi|4096840) (gi|31542984)
								NVVFVIDK	37	467.309	932.604	932.533	76.497
								LGVYELLLK	34	524.378	1046.74	1046.64	100.196
								ETLFSVMPGLK	33	619.388	1236.76	1236.64	96.9714	Oxidation (M)
								GPDVLTATVSGK	33	572.851	1143.69	1143.61	63.887
35	1387	1: gi|68534652 NRCAM protein [Homo sapiens] 2: gi|6651381 NgCAM-related related cell adhesion molecule /alternative carboxyl terminus [Homo sapiens] 3: gi|2511666 NrCAM protein [Homo sapiens] 4: gi|31874098 hypothetical protein [Homo sapiens] 5: gi|33112413 Neuronal cell adhesion molecule precursor (Nr-CAM) (NgCAM-related cell adhesion molecule) (Ng-CAM-r 6: gi|51095143 neuronal cell adhesion mol…	85268.3	69	100	3	3	ENIVIQCEAK	42	602.392	1202.77	1202.6	143.908	Carbamidomethyl (C)"(gi|6651381) (gi|2511666) (gi|31874098) (gi|33112413) (gi|51095143) (gi|6651380)
								KIDGDTIIFSNVQER	42	579.042	1734.1	1733.89	120.269
								DSTGTYTCVAR	41	615.826	1229.64	1229.53	82.9297	Carbamidomethyl (C)
35	1387	1: gi|1620909 ceruloplasmin [Homo sapiens] 2: gi|1942284 Chain , X-Ray Crystal Structure Of Human Ceruloplasmin At 3.0 Angstroms 3: gi|4557485 ceruloplasmin precursor [Homo sapiens]	115398	102	100	4	3	EVGPTNADPVCLAK	58	735.941	1469.87	1469.72	101.57	Carbamidomethyl (C)"(gi|1942284) (gi|4557485)
								GAYPLSIEPIGVR	51	686.424	1370.83	1370.76	56.2077
								LISVDTEHSNIYLQNGPDR	43	724.42	2170.24	2170.07	79.1395
35	1387	1: gi|68534652 NRCAM protein [Homo sapiens] 2: gi|31874098 hypothetical protein [Homo sapiens] 3: gi|51095143 neuronal cell adhesion molecule [Homo sapiens] 4: gi|1621283 hBRAVO/Nr-CAM precursor 5: gi|6651381 NgCAM-related related cell adhesion molecule /alternative carboxyl terminus [Homo sapiens] 6: gi|6651380 NgCAM-related related cell adhesion molecule [Homo sapiens] 7: gi|33112413 Neuronal c…	85268.3	82	100	5	5	NALGAIHHTISVR	39	463.643	1387.91	1387.77	99.3595	"(gi|31874098) (gi|51095143) (gi|1621283) (gi|6651381) (gi|6651380) (gi|33112413)
								LSPYVNYSFR	38	623.353	1244.69	1244.62	58.9988
								GKPPPSFSWTR	37	630.366	1258.72	1258.65	56.1333
								KIDGDTIIFSNVQER	34	579.018	1734.03	1733.89	79.8301
36	4808	1:gi|337760 cerebroside sulfate activator protein 2: gi|337765 cerebroside sulfate activator protein 3:gi|337767 cerebroside sulfate activator protein 4: gi|1565257 cerebroside sulfate activator [Homo sapiens] 5: gi|11386147 prosaposin isoform a preproprotein [Homo sapiens] 6:gi|48145609 PSAP [Homo sapiens] 7:gi|57209714 prosaposin (variant Gaucher disease and variant metachromatic leukodystrophy…	58429	105	100	2		LVGYLDR	36	418.24	834.465	834.46	6.59109
								QEILAALEK	62	499.28	996.545	996.549	-3.71281
								QEILAALEK	54	507.8	1013.59	1013.58	9.57008
								EVTKLIDNNKTEK	8	525.29	1572.85	1572.84	7.88385
37	1319	1: gi|1942284 Chain , X-Ray Crystal Structure Of Human Ceruloplasmin At 3.0 Angstroms 2: gi|4557485 ceruloplasmin precursor [Homo sapiens]	120009	235	100	12	10	DIFTGLIGPMK	57	596.376	1190.74	1190.64	84.8495	"(gi|4557485)
								HYYIGIIETTWDYASDHGEK	55	800.118	2397.33	2397.09	100.368
								GVYSSDVFDIFPGTYQTLEMFPR	49	890.505	2668.49	2668.25	90.1204
								DIASGLIGPLIICK	47	735.462	1468.91	1468.83	52.8631	Carbamidomethyl (C)
								GAYPLSIEPIGVR	44	686.426	1370.84	1370.76	59.2148
								LISVDTEHSNIYLQNGPDR	41	724.424	2170.25	2170.07	84.8269
								DLYSGLIGPLIVCR	41	788.482	1574.95	1574.85	63.6093	Carbamidomethyl (C)
								KALYLQYTDETFR	41	550.015	1647.02	1646.83	117.857
								EVGPTNADPVCLAK	36	735.859	1469.7	1469.72	-9.88625	Carbamidomethyl (C)
								KAEEEHLGILGPQLHADVGDKVK	36	621.7	2482.77	2482.32	182.495
37	1319	1: gi|68534652 NRCAM protein [Homo sapiens] 2: gi|51095143 neuronal cell adhesion molecule [Homo sapiens]	85268.3	71	100	5	4	AETYEGVYQCTAR	61	774.414	1546.81	1546.67	91.0206	Carbamidomethyl (C)"(gi|51095143)
								SLPSEASEQYLTK	39	726.92	1451.83	1451.71	76.8574
								ENIVIQCEAK	31	602.366	1202.72	1202.6	99.9745	Carbamidomethyl (C)
38	1386	no data
39	1353	1: gi|1483187 inter-alpha-trypsin inhibitor family heavy chain-related protein (IHRP) [Homo sapiens] 2: gi|4096840 inter-alpha-trypsin inhibitor family heavy chain-related protein [Homo sapiens] 3: gi|31542984 inter-alpha (globulin) inhibitor H4 [Homo sapiens]	103321	368	100	16	16	FSSHVGGTLGQFYQEVLWGSPAASDDGRR	76	781.919	3123.64	3123.48	52.891	"(gi|4096840) (gi|31542984)
								AEAQAQYSAAVAK	66	654.369	1306.72	1306.65	54.6909
								QGPVNLLSDPEQGVEVTGQYER	63	805.784	2414.33	2414.17	66.1991
								NPLVWVHASPEHVVVTR	61	647.4	1939.18	1939.04	69.7597
								GPDVLTATVSGK	57	572.847	1143.68	1143.61	56.9616
								QLGLPGPPDVPDHAAYHPFR	55	546.816	2183.24	2183.09	66.2277
								WKETLFSVMPGLK	53	512.643	1534.91	1534.82	56.4854
								LGVYELLLK	47	524.358	1046.7	1046.64	61.7969
								AGFSWIEVTFK	47	642.869	1283.72	1283.65	53.8774
								SPEQQETVLDGNLIIR	44	604.692	1811.06	1810.94	62.3869
								NVVFVIDK	43	467.302	932.59	932.533	61.156
								ITFELVYEELLKR	39	551.69	1652.05	1651.92	78.9488
								LQDRGPDVLTATVSGK	33	553	1655.98	1655.88	56.1954
								TGLLLLSDPDKVTIGLLFWDGRGEGLR	33	736.207	2940.8	2940.61	64.6217
								ETLFSVMPGLK	33	619.378	1236.74	1236.64	79.9641	Oxidation (M)
39	1353	1: gi|33315782 non-classical cadherin XB31alpha1 [Homo sapiens] 2: gi|57242755 calsyntenin 1 isoform 2 [Homo sapiens]	108469	192	100	14	14	GVQIQAHPSQLVLTLEGEDLGELDK	65	897.189	2688.54	2688.4	54.8301	"(gi|57242755)
								ATVHIQVNDVNEYAPVFK	60	682.065	2043.17	2043.04	64.0339
								EGLDLQVLEDSGR	54	715.902	1429.79	1429.7	58.8373
								ISIKPTCTPGWQGWNNR	43	672.374	2014.1	2013.98	57.9607	Carbamidomethyl (C)
								IHGQNVPFDAVVVDK	42	546.659	1636.95	1636.86	59.6521
								FAGEICGFK	40	514.777	1027.54	1027.48	57.6839	Carbamidomethyl (C)
								FAGEICGFK	40	514.779	1027.54	1027.48	61.6489	Carbamidomethyl (C)
								GNLAGLTLR	39	457.797	913.58	913.534	49.5657
								IHGQNVPFDAVVVDK	36	546.663	1636.97	1636.86	66.5434
								EPFTISVWMR	36	641.363	1280.71	1280.62	69.5209	Oxidation (M)
								AASEFESSEGVFLFPELR	34	672.378	2014.11	2013.97	71.4038
								LIFLFR	33	404.782	807.55	807.501	60.9287
								GNLAGLTLR	32	457.803	913.591	913.534	62.4235
								GVQIQAHPSQLVLTLEGEDLGELDKAMQHISYLNSR	32	1002.32	4005.26	4005.03	57.9157	Oxidation (M)
39	1353	1: gi|1621283 hBRAVO/Nr-CAM precursor 2: gi|2511666 NrCAM protein [Homo sapiens] 3: gi|6651381 NgCAM-related related cell adhesion molecule /alternative carboxyl terminus [Homo sapiens] 4: gi|6651380 NgCAM-related related cell adhesion molecule [Homo sapiens] 5: gi|31874098 hypothetical protein [Homo sapiens] 6: gi|33112413 Neuronal cell adhesion molecule precursor (Nr-CAM) (NgCAM-related cell ad…	143194	97	100	3	3	YIVSGTPTFVPYLIK	63	849.517	1697.02	1696.94	44.2165	"(gi|2511666) (gi|6651381) (gi|6651380) (gi|31874098) (gi|33112413) (gi|51095143)
								KIDGDTIIFSNVQER	56	579.009	1734.01	1733.89	63.8932
								LSPYVNYSFR	36	623.355	1244.7	1244.62	61.8045
39	1353	1: gi|21706696 Calsyntenin 1 [Homo sapiens] 2: gi|33315782 non-classical cadherin XB31alpha1 [Homo sapiens] 3: gi|40788983 KIAA0911 protein [Homo sapiens] 4: gi|57242755 calsyntenin 1 isoform 2 [Homo sapiens] 5: gi|57242757 calsyntenin 1 isoform 1 [Homo sapiens]	108601	73	100	2	2	EGLDLQVLEDSGR	60	715.891	1429.77	1429.7	43.5293	"(gi|33315782) (gi|40788983) (gi|57242755) (gi|57242757)
								ATVHIQVNDVNEYAPVFK	37	682.049	2043.12	2043.04	40.0902
39	1353	1: gi|21706696 Calsyntenin 1 [Homo sapiens] 2: gi|33315782 non-classical cadherin XB31alpha1 [Homo sapiens] 3: gi|40788983 KIAA0911 protein [Homo sapiens] 4: gi|57242755 calsyntenin 1 isoform 2 [Homo sapiens] 5: gi|57242757 calsyntenin 1 isoform 1 [Homo sapiens]	108601	196	100	13	10	ATEDVLVK	59	437.75	873.485	873.481	5.42084	"(gi|33315782) (gi|40788983) (gi|57242755) (gi|57242757)
								EPFTISVWMR	46	641.32	1280.63	1280.62	2.44725	Oxidation (M)
								RATEDVLVK	46	515.8	1029.59	1029.58	3.5257
								VIDCLYTCK	45	586.28	1170.55	1170.54	3.53853	2 Carbamidomethyl (C)
								IHGQNVPFDAVVVDK	44	546.63	1636.87	1636.86	6.67926
								LIFLFR	44	404.76	807.505	807.501	5.93436
								GPDGTNVK	44	394.2	786.385	786.387	-2.15924
								YISNEFK	37	450.73	899.445	899.439	7.34347
								AMQHISYLNSR	34	668.33	1334.65	1334.64	4.01382	Oxidation (M)
								STGEGVIR	33	409.72	817.425	817.429	-4.7576
39	1353	1: gi|1483187 inter-alpha-trypsin inhibitor family heavy chain-related protein (IHRP) [Homo sapiens] 2: gi|4096840 inter-alpha-trypsin inhibitor family heavy chain-related protein [Homo sapiens] 3: gi|31542984 inter-alpha (globulin) inhibitor H4 [Homo sapiens]	103321	179	100	8	7	LGVYELLLK	62	524.33	1046.65	1046.64	7.56805	"(gi|4096840) (gi|31542984)
								NMEQFQVSVSVAPNAK	61	882.94	1763.87	1763.85	8.09706	Oxidation (M)
								ANTVQEATFQMELPK	52	861.93	1721.85	1721.83	9.32555	Oxidation (M)
								VQGNDHSATR	50	542.76	1083.51	1083.51	-0.239039
								ILDDLSPR	40	464.76	927.505	927.503	3.14285
								LQDRGPDVLTATVSGK	35	552.97	1655.89	1655.88	2.39811
39	1353	1: gi|1621283 hBRAVO/Nr-CAM precursor 2: gi|2511666 NrCAM protein [Homo sapiens] 3: gi|6651380 NgCAM-related related cell adhesion molecule [Homo sapiens] 4: gi|6651381 NgCAM-related related cell adhesion molecule /alternative carboxyl terminus [Homo sapiens] 5: gi|31874098 hypothetical protein [Homo sapiens] 6: gi|33112413 Neuronal cell adhesion molecule precursor (Nr-CAM) (NgCAM-related cell ad…	143194	109	100	3	2	SLPSEASEQYLTK	84	726.87	1451.73	1451.71	7.64131	"(gi|2511666) (gi|6651380) (gi|6651381) (gi|31874098) (gi|33112413) (gi|40788219) (gi|51095143) (gi|68534652)
								NALGAIHHTISVR	51	463.6	1387.78	1387.77	7.05089
40	1329	1: gi|414791 contactin [Homo sapiens] 2: gi|28373117 contactin 1 isoform 1 precursor [Homo sapiens] 3: gi|28373119 contactin 1 isoform 2 precursor [Homo sapiens]	113263	92	100	3	3	TTKPYPADIVVQFK	49	536.328	1605.96	1605.88	52.91	"(gi|28373117) (gi|28373119)
								VQVTSQEYSAR	48	634.356	1266.7	1266.62	60.5454
								STEATLSFGYLDPFPPEERPEVR	46	879.806	2636.4	2636.28	45.6238
40	1329	1: gi|30089935 transmembrane protein 132A isoform a [Homo sapiens] 2: gi|30089937 transmembrane protein 132A isoform b [Homo sapiens]	110128	52	100	2	2	LTHLLGPDWLLDVSHLVAPHAR	40	615.884	2459.51	2459.34	66.1575	"(gi|30089937)
								LTVWAPLLPLR	35	639.938	1277.86	1277.79	59.6907
40	1329	1: gi|68534652 NRCAM protein [Homo sapiens] 2: gi|31874098 hypothetical protein [Homo sapiens] 3: gi|51095143 neuronal cell adhesion molecule [Homo sapiens] 4: gi|6651381 NgCAM-related related cell adhesion molecule /alternative carboxyl terminus [Homo sapiens] 5: gi|2511666 NrCAM protein [Homo sapiens] 6: gi|6651380 NgCAM-related related cell adhesion molecule [Homo sapiens] 7: gi|33112413 Neuro…	85268.3	54	99	2	2	SLPSEASEQYLTK	45	726.941	1451.87	1451.71	106.126	"(gi|31874098) (gi|51095143) (gi|6651381) (gi|2511666) (gi|6651380) (gi|33112413)
								LSPYVNYSFR	36	623.387	1244.76	1244.62	113.223
40	1329	1: gi|5453766 nel-like 2 [Homo sapiens] 2: gi|13874433 cerebral protein-12 [Homo sapiens]	91284.5	53	99	2	2	IMELQDILAK	48	595.383	1188.75	1188.64	92.4248	Oxidation (M)"(gi|13874433)
								AFLFQDTPR	34	547.85	1093.68	1093.56	118.125
40	1329	1: gi|2511666 NrCAM protein [Homo sapiens] 2: gi|6651380 NgCAM-related related cell adhesion molecule [Homo sapiens] 3: gi|6651381 NgCAM-related related cell adhesion molecule /alternative carboxyl terminus [Homo sapiens] 4: gi|31874098 hypothetical protein [Homo sapiens] 5: gi|33112413 Neuronal cell adhesion molecule precursor (Nr-CAM) (NgCAM-related cell adhesion molecule) (Ng-CAM-r 6: gi|51095…	143283	222	100	9	9	GAAVSNNIVVRPSR	56	480.61	1438.81	1438.8	5.41215	"(gi|6651380) (gi|6651381) (gi|31874098) (gi|33112413) (gi|51095143) (gi|68534652)
								QPEYAVVQR	55	545.29	1088.57	1088.56	3.70305
								SLPSEASEQYLTK	55	726.87	1451.73	1451.71	7.64131
								NALGAIHHTISVR	54	463.6	1387.78	1387.77	7.05089
								LSPYVNYSFR	53	623.32	1244.63	1244.62	5.23935
								NEVHLEIK	46	491.276	980.537	980.529	7.8682
								DSTGTYTCVAR	45	615.78	1229.55	1229.53	8.79276	Carbamidomethyl (C)
								ENIVIQCEAK	43	602.31	1202.61	1202.6	7.45637	Carbamidomethyl (C)
								LPQSER	39	365.2	728.385	728.382	5.16899
40	1329	1: gi|414791 contactin [Homo sapiens] 2: gi|28373117 contactin 1 isoform 1 precursor [Homo sapiens] 3: gi|28373119 contactin 1 isoform 2 precursor [Homo sapiens]	113263	152	100	6	4	IVESYQIR	74	504.28	1006.55	1006.54	0.735188	"(gi|28373117) (gi|28373119)
								IKTDGAAPNVAPSDVGGGGGR	50	632.66	1894.96	1894.95	4.5236
								VTVTNPDTGR	50	530.28	1058.55	1058.54	9.29019
								ILALAPTFEMNPMK	44	804.42	1606.83	1606.81	9.71055	2 Oxidation (M)
40	1329	1: gi|5453766 nel-like 2 [Homo sapiens] 2: gi|13874433 cerebral protein-12 [Homo sapiens]	91284.5	128	100	3	3	IMELQDILAK	63	595.33	1188.65	1188.64	2.5811	Oxidation (M)"(gi|13874433)
								ASTATAEQFFQK	62	664.83	1327.65	1327.64	3.50622
								AFLFQDTPR	55	547.79	1093.57	1093.56	8.98903
40	1329	1: gi|1483187 inter-alpha-trypsin inhibitor family heavy chain-related protein (IHRP) [Homo sapiens] 2: gi|4096840 inter-alpha-trypsin inhibitor family heavy chain-related protein [Homo sapiens] 3: gi|31542984 inter-alpha (globulin) inhibitor H4 [Homo sapiens]	103321	69	99	2	1	LGVYELLLK	69	524.33	1046.65	1046.64	7.56805	"(gi|4096840) (gi|31542984)
40	1329	1: gi|1621283 hBRAVO/Nr-CAM precursor 2: gi|6651381 NgCAM-related related cell adhesion molecule /alternative carboxyl terminus [Homo sapiens] 3: gi|6651380 NgCAM-related related cell adhesion molecule [Homo sapiens] 4: gi|33112413 Neuronal cell adhesion molecule precursor (Nr-CAM) (NgCAM-related cell adhesion molecule) (Ng-CAM-r	143194	223	100	8	7	TLQIIHVSEADSGNYQCIAK	70	749.757	2246.25	2246.1	66.9623	Carbamidomethyl (C)"(gi|6651381) (gi|6651380) (gi|33112413)
								SLPSEASEQYLTK	69	726.9	1451.79	1451.71	49.6165
								KIDGDTIIFSNVQER	63	579.005	1733.99	1733.89	57.4896
								SVQLSWTPGDDNNSPITK	48	653.697	1958.07	1957.94	66.237
								AAPYWITAPQNLVLSPGEDGTLICR	46	914.849	2741.53	2741.38	51.5148	Carbamidomethyl (C)
								YIVSGTPTFVPYLIK	42	849.518	1697.02	1696.94	45.79
								LLEDLVQPPTITQQSPK	39	636.391	1906.15	1906.04	57.5155
41	2456	1: gi|532198 angiotensinogen 2: gi|553181 angiotensinogen 3: gi|4557287 angiotensinogen preproprotein [Homo sapiens] 4: gi|15079348 Angiotensinogen (serpin peptidase inhibitor, clade A, member 8) [Homo sapiens] 5: gi|37790798 angiotensinogen (serine (or cysteine) proteinase inhibitor, clade A (alpha-1 antiproteinase, antitr 6: gi|62089124 angiotensinogen precursor variant [Homo sapiens] 7: gi|628…	53121.5	310	100	10	10	AAMVGMLANFLGFR	88	749.43	1496.85	1496.76	54.8657	"(gi|553181) (gi|4557287) (gi|15079348) (gi|37790798) (gi|62089124) (gi|62897155)
								SLDFTELDVAAEK	75	719.392	1436.77	1436.7	46.1675
								QPFVQGLALYTPVVLPR	70	941.088	1880.16	1880.06	55.6781	Pyro-glu (N-term Q)
								ALQDQLVLVAAK	67	634.917	1267.82	1267.75	55.3508
								ADSQAQLLLSTVVGVFTAPGLHLK	65	822.512	2464.52	2464.37	59.5434
								FMQAVTGWK	53	534.303	1066.59	1066.53	59.8457
								DPTFIPAPIQAK	53	649.398	1296.78	1296.71	57.2558
								QPFVQGLALYTPVVLPR	51	633.406	1897.2	1897.08	60.1086
								LDTEDKLR	40	495.293	988.572	988.519	53.4841
								LQAILGVPWK	37	562.874	1123.73	1123.68	50.9355
41	2456	1: gi|5802984 UDP-GlcNAc:betaGal beta-1,3-N-acetylglucosaminyltransferase 1 [Homo sapiens]	47088.9	93	99	2	2	TALASGGVLDASGDYR	82	776.89	1551.77	1551.75	8.12629	"
								VPTFDER	36	432.22	862.425	862.418	8.10627
42	2550	1: gi|20178323 Pigment epithelium-derived factor precursor (PEDF) (Serpin-F1) (EPC-1)	46313.3	356	100	11	12	LAAAVSNFGYDLYR	105	780.447	1558.88	1558.78	65.3871	"
								SSMSPTTNVLLSPLSVATALSALSLGAEQR	85	1006.62	3016.83	3016.57	84.9636	Oxidation (M)
								ELLDTVTAPQK	77	607.873	1213.73	1213.66	61.8545
								DTDTGALLFIGK	72	625.878	1249.74	1249.66	68.4573
								EIPDEISILLLGVAHFK	62	632.075	1893.2	1893.06	74.5739
								SSFVAPLEK	62	489.304	976.593	976.523	71.5836
								TVQAVLTVPK	52	528.368	1054.72	1054.64	78.6459
								TVQAVLTVPK	51	528.36	1054.71	1054.64	64.1405
								ALYYDLISSPDIHGTYK	46	652.708	1955.1	1954.97	69.3239
								IAQLPLTGSMSIIFFLPLK	40	702.465	2104.37	2104.2	81.3525	Oxidation (M)
								KTSLEDFYLDEER	35	548.973	1643.9	1643.77	78.4752
								SSFVAPLEK	33	489.304	976.594	976.523	72.5953
42	2550	1: gi|3983127 monocyte antigen CD14 precursor [Homo sapiens] 2: gi|4557417 CD14 antigen precursor [Homo sapiens]	40064.8	99	100	4	4	LTVGAAQVPAQLLVGALR	67	593.069	1776.19	1776.06	69.9317	"(gi|4557417)
								AFPALTSLDLSDNPGLGER	60	658.383	1972.13	1971.99	69.012
								SWLAELQQWLKPGLK	45	599.728	1796.16	1796	90.847
								VLSIAQAHSPAFSCEQVR	36	667.395	1999.16	1998.99	84.8056	Carbamidomethyl (C)
42	2550	1: gi|3451335 F22162_1 [Homo sapiens] 2: gi|21686977 immunoglobulin superfamily, member 4C [Homo sapiens]	41761.2	55	99	2	2	FQLEEFSPR	59	576.833	1151.65	1151.56	78.0896	"(gi|21686977)
43	2125	1: gi|21071039 carnosinase 1 [Homo sapiens]	56656.1	792	100	23	24	EWVAIESDSVQPVPR	109	856.484	1710.95	1710.86	56.3501	"
								FIIEGMEEAGSVALEELVEKEKDR	94	681.139	2720.53	2720.36	62.4451
								SVVLIPLGAVDDGEHSQNEK	85	703.069	2106.18	2106.06	59.5012
								FIIEGMEEAGSVALEELVEKEKDR	73	685.141	2736.54	2736.35	67.1324	Oxidation (M)
								YPSLSIHGIEGAFDEPGTK	72	673.381	2017.12	2016.98	71.0225
								GPVLAWINAVSAFR	71	750.959	1499.9	1499.82	53.0795
								FIIEGMEEAGSVALEELVEK	65	731.753	2192.24	2192.09	65.5064
								GDGWLTDPYVLTEVDGK	64	932.996	1863.98	1863.89	47.0232
								GTVCFYGHLDVQPADR	64	612.335	1833.98	1833.85	73.8022	Carbamidomethyl (C)
								VFQYIDLHQDEFVQTLK	62	708.409	2122.2	2122.07	61.839
								ALEQDLPVNIK	61	620.383	1238.75	1238.69	51.2882
								GATDNKGPVLAWINAVSAFR	60	696.413	2086.22	2086.1	57.8598
								FLFDTKEEILMHLWR	58	665.382	1993.12	1993.01	56.0117	Oxidation (M)
								MMAVAADTLQR	58	603.835	1205.66	1205.59	54.9142
								FLFDTKEEILMHLWR	53	495.293	1977.14	1977.02	62.1117
								GNSYFMVEVK	52	587.317	1172.62	1172.55	56.7479
								GNSYFMVEVK	52	595.318	1188.62	1188.55	61.1292	Oxidation (M)
								LFAAFFLEMAQLH	52	769.441	1536.87	1536.78	56.8526
								LFAAFFLEMAQLH	48	777.437	1552.86	1552.77	54.2906	Oxidation (M)
								KPAITYGTR	40	503.811	1005.61	1005.56	45.9773
								TVFGTEPDMIR	38	633.354	1264.69	1264.61	64.4332
								FLFDTK	35	385.729	769.444	769.401	55.8928
								TVFGTEPDMIR	33	641.344	1280.67	1280.61	52.2455	Oxidation (M)
								VASVDMGPQQLPDGQSLPIPPVILAELGSDPTK	31	1123.99	3368.94	3368.75	54.9209
43	2125	1: gi|532198 angiotensinogen 2: gi|553181 angiotensinogen 3: gi|4557287 angiotensinogen preproprotein [Homo sapiens] 4: gi|15079348 Angiotensinogen (serpin peptidase inhibitor, clade A, member 8) [Homo sapiens] 5: gi|37790798 angiotensinogen (serine (or cysteine) proteinase inhibitor, clade A (alpha-1 antiproteinase, antitr 6: gi|62089124 angiotensinogen precursor variant [Homo sapiens] 7: gi|628…	53121.5	316	100	11	12	SLDFTELDVAAEK	80	719.398	1436.78	1436.7	54.5144	"(gi|553181) (gi|4557287) (gi|15079348) (gi|37790798) (gi|62089124) (gi|62897155)
								VLSALQAVQGLLVAQGR	77	575.047	1722.12	1722.02	60.2724
								SLDFTELDVAAEKIDR	70	608.014	1821.02	1820.92	57.677
								AAMVGMLANFLGFR	68	749.431	1496.85	1496.76	55.9414
								FMQAVTGWK	58	534.305	1066.6	1066.53	64.4456
								DPTFIPAPIQAK	57	649.402	1296.79	1296.71	62.7219
								AAMVGMLANFLGFR	54	765.419	1528.82	1528.75	45.6045	2 Oxidation (M)
								LQAILGVPWK	49	562.883	1123.75	1123.68	67.1377
								ADSQAQLLLSTVVGVFTAPGLHLK	48	822.519	2464.53	2464.37	67.1105
								QPFVQGLALYTPVVLPR	38	633.418	1897.23	1897.08	78.5063
								ALQDQLVLVAAK	37	634.914	1267.81	1267.75	50.7127
								LDTEDKLR	31	495.297	988.58	988.519	62.0342
43	2125	1: gi|4504893 kininogen 1 [Homo sapiens] 2: gi|37748641 Kininogen 1 [Homo sapiens] 3: gi|62898910 kininogen 1 variant [Homo sapiens]	47852.7	157	100	6	7	DIPTNSPELEETLTHTITK	72	713.742	2138.2	2138.07	60.5442	"(gi|37748641) (gi|62898910)
								IGEIKEETTSHLR	53	504.966	1511.88	1511.79	53.9591
								KYFIDFVAR	51	579.846	1157.68	1157.62	47.2364
								YFIDFVAR	43	515.799	1029.58	1029.53	53.1952
								QVVAGLNFR	41	502.315	1002.61	1002.56	53.8192
								TVGSDTFYSFK	37	626.337	1250.66	1250.58	61.8552
								RPPGFSPFR	31	530.816	1059.62	1059.56	52.8936
43	2125	1: gi|4504893 kininogen 1 [Homo sapiens] 2: gi|37748641 Kininogen 1 [Homo sapiens] 3: gi|62898910 kininogen 1 variant [Homo sapiens]	47852.7	202	100	7	7	IGEIKEETTSHLR	86	504.94	1511.8	1511.79	2.54334	"(gi|37748641) (gi|62898910)
								TVGSDTFYSFK	59	626.3	1250.59	1250.58	2.85387
								YFIDFVAR	55	515.771	1029.53	1029.53	0.104902
								QVVAGLNFR	49	502.29	1002.57	1002.56	4.43165
								EGDCPVQSGK	39	538.74	1075.47	1075.46	4.70496	Carbamidomethyl (C)
								VQVVAGKK	35	414.77	827.525	827.523	3.16728
								RPPGFSPFR	34	530.79	1059.57	1059.56	3.86198
43	2125	1: gi|21071039 carnosinase 1 [Homo sapiens]	56656.1	184	100	9	7	MMAVAADTLQR	64	619.8	1237.59	1237.58	4.83201	2 Oxidation (M)"
								AIHLDLEEYR	58	629.83	1257.65	1257.64	8.05718
								HLEDVFSK	47	487.75	973.485	973.487	-1.45251
								HLEDVFSKR	44	377.54	1129.6	1129.59	9.03427
								KPAITYGTR	38	503.79	1005.57	1005.56	4.72274
43	2125	1: gi|21071039 carnosinase 1 [Homo sapiens] 2: gi|16555792 glutamate carboxypeptidase-like protein 2 [Homo sapiens]	56656.1	138	100	6	6	SVVLIPLGAVDDGEHSQNEK	61	703.068	2106.18	2106.06	58.6123	"(gi|16555792)
								EWVAIESDSVQPVPR	50	856.489	1710.96	1710.86	62.2431
								AIHLDLEEYR	49	629.862	1257.71	1257.64	58.156
								ALEQDLPVNIK	41	620.39	1238.76	1238.69	62.5194
								YPSLSIHGIEGAFDEPGTK	40	673.384	2017.13	2016.98	75.3865
								VFQYIDLHQDEFVQTLK	39	708.422	2122.25	2122.07	81.0443
43	2125	1: gi|36573 unnamed protein product [Homo sapiens] 2: gi|36575 unnamed protein product [Homo sapiens] 3: gi|13477169 Vitronectin [Homo sapiens] 4: gi|88853069 vitronectin precursor [Homo sapiens]	54308.1	88	100	4	4	DWHGVPGQVDAAMAGR	72	561.6	1681.78	1681.76	9.00305	Oxidation (M)"(gi|36575) (gi|13477169) (gi|88853069)
								DVWGIEGPIDAAFTR	36	823.92	1645.83	1645.81	9.40631
								TSAGTRQPQFISR	36	483.59	1447.75	1447.75	-3.4336
								QPQFISR	33	438.24	874.465	874.466	-0.722727
43	2125	1: gi|5531817 secretogranin III [Homo sapiens] 2: gi|15778922 Secretogranin III [Homo sapiens] 3: gi|19557645 secretogranin III [Homo sapiens]	53047.9	136	100	4	4	LLNLGLITESQAHTLEDEVAEVLQK	58	921.886	2762.64	2762.47	60.3054	"(gi|15778922) (gi|19557645)
								SSPLDNKLNVEDVDSTK	55	621.012	1860.01	1859.91	55.2188
								FQDDPDGLHQLDGTPLTAEDIVHK	54	666.118	2660.44	2660.27	65.0528
								TLIDFVK	45	418.275	834.536	834.485	60.6254
43	2125	1: gi|28332 unnamed protein product [Homo sapiens] 2: gi|177809 alpha-1-antichymotrypsin 3: gi|177933 alpha-1-antichymotrypsin precursor 4: gi|443345 Chain A, Alpha1 Antichymotrypsin 5: gi|1340142 alpha1-antichymotrypsin [Homo sapiens] 6: gi|2982038 Chain A, Cleaved Antichymotrypsin A349r 7: gi|2982150 Chain A, Cleaved Antichymotrypsin A347r 8: gi|2982165 Chain A, Cleaved Antichymotrypsin T345r 9…	25160	91	100	2	2	ADLSGITGAR	74	480.76	959.505	959.504	1.95622	"(gi|177809) (gi|177933) (gi|443345) (gi|1340142) (gi|2982038) (gi|2982150) (gi|2982165) (gi|4165890) (gi|6980544) (gi|15341985) (gi|21961493) (gi|50659080)
								NLAVSQVVHK	44	547.82	1093.63	1093.62	1.00949
43	2125	1: gi|532198 angiotensinogen 2: gi|553181 angiotensinogen 3: gi|4557287 angiotensinogen preproprotein [Homo sapiens] 4: gi|15079348 Angiotensinogen (serpin peptidase inhibitor, clade A, member 8) [Homo sapiens] 5: gi|37790798 angiotensinogen (serine (or cysteine) proteinase inhibitor, clade A (alpha-1 antiproteinase, antitr 6: gi|62089124 angiotensinogen precursor variant [Homo sapiens] 7: gi|628…	53121.5	53	99	2	2	ALQDQLVLVAAK	46	634.922	1267.83	1267.75	62.2749	"(gi|553181) (gi|4557287) (gi|15079348) (gi|37790798) (gi|62089124) (gi|62897155)
								SLDFTELDVAAEK	31	719.399	1436.78	1436.7	56.1111
43	2125	1: gi|7512417 extracellular protein - human 2: gi|9665262 EGF-containing fibulin-like extracellular matrix protein 1 precursor [Homo sapiens] 3: gi|62088004 EGF-containing fibulin-like extracellular matrix protein 1 isoform b variant [Homo sapiens] 4: gi|62822120 unknown [Homo sapiens]	43108.8	58	100	6	1	EHIVDLEMLTVSSIGTFR	59	688.38	2062.12	2062.04	37.9081	Oxidation (M)"(gi|9665262) (gi|62088004) (gi|62822120)
43	2125	1: gi|36575 unnamed protein product [Homo sapiens] 2: gi|36573 unnamed protein product [Homo sapiens] 3: gi|13477169 Vitronectin [Homo sapiens] 4: gi|88853069 vitronectin precursor [Homo sapiens]	54367.2	63	98	2	1	FEDGVLDPDYPR	64	711.891	1421.77	1421.65	84.9571	"(gi|36573) (gi|13477169) (gi|88853069)
44	2131	1: gi|21071039 carnosinase 1 [Homo sapiens]	56656.1	282	100	14	13	SVVLIPLGAVDDGEHSQNEK	71	703.082	2106.22	2106.06	77.8952	"
								EWVAIESDSVQPVPR	66	856.478	1710.94	1710.86	49.1607
								ALEQDLPVNIK	65	620.39	1238.77	1238.69	63.5463
								MMAVAADTLQR	58	603.849	1205.68	1205.59	77.7512
								GDGWLTDPYVLTEVDGK	48	933.008	1864	1863.89	60.0647
								FIIEGMEEAGSVALEELVEK	47	731.763	2192.27	2192.09	79.5902
								TVFGTEPDMIR	38	633.341	1264.67	1264.61	44.2547
								GNSYFMVEVK	34	595.312	1188.61	1188.55	51.5982	Oxidation (M)
								GNSYFMVEVK	33	587.316	1172.62	1172.55	53.6862
								HLEDVFSKR	33	377.573	1129.7	1129.59	96.0952
								FLFDTK	31	385.738	769.461	769.401	77.4031
44	2131	1: gi|21071039 carnosinase 1 [Homo sapiens]	56656.1	209	100	10	9	MMAVAADTLQR	58	603.857	1205.7	1205.59	91.9086	"
								EWVAIESDSVQPVPR	58	856.494	1710.97	1710.86	67.1821
								ALEQDLPVNIK	56	620.403	1238.79	1238.69	84.7268
								HLEDVFSK	50	487.791	973.567	973.487	82.0884
								FLFDTK	44	385.739	769.463	769.401	80.5692
								MMAVAADTLQR	43	611.854	1221.69	1221.58	88.3533	Oxidation (M)
								TVFGTEPDMIR	40	633.365	1264.71	1264.61	81.2463
								GNSYFMVEVK	39	595.326	1188.64	1188.55	74.5186	Oxidation (M)
44	2131	1: gi|21071039 carnosinase 1 [Homo sapiens]	56656.1	193	100	10	7	HLEDVFSK	56	487.75	973.485	973.487	-1.45251	"
								AIHLDLEEYR	56	629.83	1257.65	1257.64	8.05718
								MMAVAADTLQR	54	619.8	1237.59	1237.58	4.83201	2 Oxidation (M)
								YPSLSIHGIEGAFDEPGTK	47	673.34	2017	2016.98	9.40515
								HLEDVFSKR	41	377.54	1129.6	1129.59	9.03427
								WNYIEGTK	35	505.75	1009.49	1009.49	-1.40071
44	2131	1: gi|4504893 kininogen 1 [Homo sapiens] 2: gi|37748641 Kininogen 1 [Homo sapiens] 3: gi|62898910 kininogen 1 variant [Homo sapiens]	47852.7	122	100	6	5	YNSQNQSNNQFVLYR	50	625.69	1874.05	1873.87	94.7728	"(gi|37748641) (gi|62898910)
								DIPTNSPELEETLTHTITK	47	713.756	2138.25	2138.07	80.2442
								TVGSDTFYSFK	43	626.342	1250.67	1250.58	70.52
								ENFLFLTPDCK	37	692.372	1382.73	1382.65	53.9578	Carbamidomethyl (C)
								QVVAGLNFR	37	502.313	1002.61	1002.56	50.2982
44	2131	1: gi|4504893 kininogen 1 [Homo sapiens] 2: gi|37748641 Kininogen 1 [Homo sapiens] 3: gi|62898910 kininogen 1 variant [Homo sapiens]	47852.7	157	100	7	5	IGEIKEETTSHLR	92	504.94	1511.8	1511.79	2.54334	"(gi|37748641) (gi|62898910)
								TVGSDTFYSFK	51	626.3	1250.59	1250.58	2.85387
								QVVAGLNFR	51	502.29	1002.57	1002.56	4.43165
								VQVVAGKK	35	414.77	827.525	827.523	3.16728
								RPPGFSPFR	32	530.79	1059.57	1059.56	3.86198
44	2131	1: gi|4504893 kininogen 1 [Homo sapiens] 2: gi|37748641 Kininogen 1 [Homo sapiens] 3: gi|62898910 kininogen 1 variant [Homo sapiens] 4: gi|124056474 Kininogen-1 precursor (Alpha-2-thiol proteinase inhibitor) [Contains: Kininogen-1 heavy chain; Brad	47852.7	86	100	3	4	TVGSDTFYSFK	74	626.349	1250.68	1250.58	80.6417	"(gi|37748641) (gi|62898910) (gi|124056474)
								DIPTNSPELEETLTHTITK	34	713.775	2138.3	2138.07	106.682
								QVVAGLNFR	32	502.324	1002.63	1002.56	72.9761
								YNSQNQSNNQFVLYR	31	937.989	1873.96	1873.87	50.0456
44	2131	1: gi|532198 angiotensinogen 2: gi|553181 angiotensinogen 3: gi|4557287 angiotensinogen preproprotein [Homo sapiens] 4: gi|15079348 Angiotensinogen (serpin peptidase inhibitor, clade A, member 8) [Homo sapiens] 5: gi|37790798 angiotensinogen (serine (or cysteine) proteinase inhibitor, clade A (alpha-1 antiproteinase, antitr 6: gi|62089124 angiotensinogen precursor variant [Homo sapiens] 7: gi|628…	53121.5	104	100	4	4	ALQDQLVLVAAK	68	634.918	1267.82	1267.75	55.8667	"(gi|553181) (gi|4557287) (gi|15079348) (gi|37790798) (gi|62089124) (gi|62897155)
								SLDFTELDVAAEK	50	719.407	1436.8	1436.7	67.4092
								ADSQAQLLLSTVVGVFTAPGLHLK	45	822.527	2464.56	2464.37	77.7428
44	2131	1: gi|36573 unnamed protein product [Homo sapiens] 2: gi|13477169 Vitronectin [Homo sapiens] 3: gi|88853069 vitronectin precursor [Homo sapiens]	54308.1	104	100	4	3	DVWGIEGPIDAAFTR	69	823.92	1645.83	1645.81	9.40631	"(gi|13477169) (gi|88853069)
								DWHGVPGQVDAAMAGR	66	561.6	1681.78	1681.76	9.00305	Oxidation (M)
								QPQFISR	34	438.24	874.465	874.466	-0.722727
44	2131	1: gi|532198 angiotensinogen 2: gi|553181 angiotensinogen 3: gi|4557287 angiotensinogen preproprotein [Homo sapiens]	53121.5	62	99	2	2	VLSALQAVQGLLVAQGR	55	575.081	1722.22	1722.02	119.516	"(gi|553181) (gi|4557287)
								DPTFIPAPIQAK	51	649.414	1296.81	1296.71	81.5434
44	2131	1: gi|28332 unnamed protein product [Homo sapiens] 2: gi|177809 alpha-1-antichymotrypsin 3: gi|177933 alpha-1-antichymotrypsin precursor 4: gi|443345 Chain A, Alpha1 Antichymotrypsin 5: gi|1340142 alpha1-antichymotrypsin [Homo sapiens] 6: gi|2982038 Chain A, Cleaved Antichymotrypsin A349r 7: gi|2982150 Chain A, Cleaved Antichymotrypsin A347r 8: gi|2982165 Chain A, Cleaved Antichymotrypsin T345r 9…	25160	90	100	2	2	NLAVSQVVHK	61	547.82	1093.63	1093.62	1.00949	"(gi|177809) (gi|177933) (gi|443345) (gi|1340142) (gi|2982038) (gi|2982150) (gi|2982165) (gi|4165890) (gi|6980544) (gi|15341985) (gi|21961493) (gi|50659080)
								ADLSGITGAR	58	480.76	959.505	959.504	1.95622
45	2152	1: gi|21071039 carnosinase 1 [Homo sapiens]	56656.1	277	100	17	17	MMAVAADTLQR	64	603.814	1205.61	1205.59	19.4544	"
								SVVLIPLGAVDDGEHSQNEK	62	703.096	2106.27	2106.06	98.8149
								GPVLAWINAVSAFR	62	750.992	1499.97	1499.82	96.6833
								YPSLSIHGIEGAFDEPGTK	59	673.416	2017.23	2016.98	122.312
								GTVCFYGHLDVQPADR	50	612.377	1834.11	1833.85	143.69	Carbamidomethyl (C)
								ALEQDLPVNIK	48	620.399	1238.78	1238.69	77.8647
								MMAVAADTLQR	47	611.863	1221.71	1221.58	103.945	Oxidation (M)
								MMAVAADTLQR	44	611.856	1221.7	1221.58	92.2646	Oxidation (M)
								GDGWLTDPYVLTEVDGK	41	933.082	1864.15	1863.89	139.301
								TVFGTEPDMIR	40	633.355	1264.7	1264.61	66.1096
								GNSYFMVEVK	39	587.335	1172.66	1172.55	87.5713
								MMAVAADTLQR	33	611.846	1221.68	1221.58	76.2215	Oxidation (M)
								HLEDVFSK	32	487.763	973.512	973.487	25.9439
								DGSTIPIAK	32	451.294	900.574	900.492	91.7488
								FLFDTK	32	385.744	769.473	769.401	93.7872
								TVFGTEPDMIR	31	641.368	1280.72	1280.61	88.9906	Oxidation (M)
45	2152	1: gi|21071039 carnosinase 1 [Homo sapiens]	56656.1	366	100	16	15	EWVAIESDSVQPVPR	102	856.467	1710.92	1710.86	36.0796	"
								MMAVAADTLQR	65	611.836	1221.66	1221.58	59.4744	Oxidation (M)
								FLFDTKEEILMHLWR	56	660.063	1977.17	1977.02	75.8754
								MMAVAADTLQR	53	603.838	1205.66	1205.59	59.8147
								YPSLSIHGIEGAFDEPGTK	53	673.383	2017.13	2016.98	74.0687
								GTVCFYGHLDVQPADR	50	612.342	1834.01	1833.85	86.33	Carbamidomethyl (C)
								GNSYFMVEVK	50	587.314	1172.61	1172.55	51.7776
								MMAVAADTLQR	49	619.838	1237.66	1237.58	66.1808	2 Oxidation (M)
								TVFGTEPDMIR	49	633.316	1264.62	1264.61	3.57659
								ALEQDLPVNIK	45	620.382	1238.75	1238.69	50.3969
								GDGWLTDPYVLTEVDGK	44	933.022	1864.03	1863.89	75.3682
								HLEDVFSKR	42	565.782	1129.55	1129.59	-34.7038
								GNSYFMVEVK	33	595.319	1188.62	1188.55	62.5763	Oxidation (M)
								MMAVAADTLQR	33	611.826	1221.64	1221.58	44.0322	Oxidation (M)
45	2152	1: gi|553181 angiotensinogen 2: gi|532198 angiotensinogen 3: gi|4557287 angiotensinogen preproprotein [Homo sapiens] 4: gi|15079348 Angiotensinogen (serpin peptidase inhibitor, clade A, member 8) [Homo sapiens] 5: gi|37790798 angiotensinogen (serine (or cysteine) proteinase inhibitor, clade A (alpha-1 antiproteinase, antitr 6: gi|62089124 angiotensinogen precursor variant [Homo sapiens] 7: gi|628…	36549.9	153	100	5	5	SLDFTELDVAAEK	75	719.392	1436.77	1436.7	45.3531	"(gi|532198) (gi|4557287) (gi|15079348) (gi|37790798) (gi|62089124) (gi|62897155)
								ALQDQLVLVAAK	59	634.908	1267.8	1267.75	40.1459
								FMQAVTGWK	59	534.302	1066.59	1066.53	58.8893
								DPTFIPAPIQAK	50	649.394	1296.77	1296.71	50.0159
								QPFVQGLALYTPVVLPR	42	633.416	1897.23	1897.08	75.8607
45	2152	1: gi|532198 angiotensinogen 2: gi|553181 angiotensinogen 3: gi|4557287 angiotensinogen preproprotein [Homo sapiens] 4: gi|15079348 Angiotensinogen (serpin peptidase inhibitor, clade A, member 8) [Homo sapiens] 5: gi|37790798 angiotensinogen (serine (or cysteine) proteinase inhibitor, clade A (alpha-1 antiproteinase, antitr 6: gi|62089124 angiotensinogen precursor variant [Homo sapiens] 7: gi|628…	53121.5	88	100	4	5	DPTFIPAPIQAK	49	649.416	1296.82	1296.71	85.333	"(gi|553181) (gi|4557287) (gi|15079348) (gi|37790798) (gi|62089124) (gi|62897155)
								SLDFTELDVAAEK	48	719.415	1436.81	1436.7	77.5045
								FMQAVTGWK	41	534.304	1066.59	1066.53	61.9441
								ALQDQLVLVAAK	37	634.928	1267.84	1267.75	71.8793
45	2152	1: gi|4504893 kininogen 1 [Homo sapiens] 2: gi|37748641 Kininogen 1 [Homo sapiens] 3: gi|62898910 kininogen 1 variant [Homo sapiens]	47852.7	60	99	2	3	TVGSDTFYSFK	51	626.33	1250.64	1250.58	50.0527	"(gi|37748641) (gi|62898910)
								QVVAGLNFR	35	502.317	1002.62	1002.56	57.8848
								DIPTNSPELEETLTHTITK	31	713.752	2138.23	2138.07	75.1101
45	2152	1: gi|21071039 carnosinase 1 [Homo sapiens] 2: gi|16555792 glutamate carboxypeptidase-like protein 2 [Homo sapiens]	56656.1	192	100	7	6	SVVLIPLGAVDDGEHSQNEK	66	703.061	2106.16	2106.06	49.0485	"(gi|16555792)
								ALEQDLPVNIK	60	620.381	1238.75	1238.69	49.2877
								AIHLDLEEYR	57	629.852	1257.69	1257.64	43.2979
								VFQYIDLHQDEFVQTLK	57	708.401	2122.18	2122.07	50.8743
								YPSLSIHGIEGAFDEPGTK	55	673.359	2017.05	2016.98	37.1372
								HLEDVFSK	44	487.775	973.536	973.487	50.2667
45	2152	1: gi|553181 angiotensinogen 2: gi|532198 angiotensinogen 3: gi|4557287 angiotensinogen preproprotein [Homo sapiens] 4: gi|15079348 Angiotensinogen (serpin peptidase inhibitor, clade A, member 8) [Homo sapiens] 5: gi|37790798 angiotensinogen (serine (or cysteine) proteinase inhibitor, clade A (alpha-1 antiproteinase, antitr 6: gi|62089124 angiotensinogen precursor variant [Homo sapiens] 7: gi|628…	36549.9	153	100	3	5	ALQDQLVLVAAK	85	634.906	1267.8	1267.75	38.0872	"(gi|532198) (gi|4557287) (gi|15079348) (gi|37790798) (gi|62089124) (gi|62897155)
								SLDFTELDVAAEK	80	719.403	1436.79	1436.7	61.2604
								DPTFIPAPIQAK	39	649.387	1296.76	1296.71	39.7468
45	2152	1: gi|4504893 kininogen 1 [Homo sapiens] 2: gi|37748641 Kininogen 1 [Homo sapiens] 3: gi|62898910 kininogen 1 variant [Homo sapiens] 4: gi|124056474 Kininogen-1 precursor (Alpha-2-thiol proteinase inhibitor) [Contains: Kininogen-1 heavy chain; Brad	47852.7	95	100	4	4	DIPTNSPELEETLTHTITK	51	713.749	2138.22	2138.07	70.2272	"(gi|37748641) (gi|62898910) (gi|124056474)
								TVGSDTFYSFK	49	626.323	1250.63	1250.58	38.9811
								YFIDFVAR	35	515.801	1029.59	1029.53	57.8187
								QVVAGLNFR	35	493.298	984.581	985.534	-967.225	Pyro-glu (N-term Q)
45	2152	1: gi|4504893 kininogen 1 [Homo sapiens] 2: gi|37748641 Kininogen 1 [Homo sapiens] 3: gi|62898910 kininogen 1 variant [Homo sapiens]	47852.7	161	100	6	4	IGEIKEETTSHLR	86	504.94	1511.8	1511.79	2.54334	"(gi|37748641) (gi|62898910)
								QVVAGLNFR	54	502.29	1002.57	1002.56	4.43165
								TVGSDTFYSFK	50	626.3	1250.59	1250.58	2.85387
								YFIDFVAR	50	515.774	1029.53	1029.53	4.76723
46	5614	1: gi|21071039 carnosinase 1 [Homo sapiens]	56656.1	486	100	19	18	EWVAIESDSVQPVPR	96	856.508	1711	1710.86	84.2893	"
								SVVLIPLGAVDDGEHSQNEK	82	703.092	2106.26	2106.06	93.0942
								GPVLAWINAVSAFR	62	750.987	1499.96	1499.82	89.5865
								GTVCFYGHLDVQPADR	61	612.363	1834.07	1833.85	120.65	Carbamidomethyl (C)
								ALEQDLPVNIK	58	620.4	1238.79	1238.69	79.8394
								MMAVAADTLQR	54	611.853	1221.69	1221.58	87.7753	Oxidation (M)
								MMAVAADTLQR	53	603.856	1205.7	1205.59	88.6371
								YPSLSIHGIEGAFDEPGTK	52	673.41	2017.21	2016.98	112.938
								MMAVAADTLQR	50	611.863	1221.71	1221.58	104.447	Oxidation (M)
								TVFGTEPDMIR	49	633.368	1264.72	1264.61	85.801
								HLEDVFSK	43	487.778	973.542	973.487	56.5349
								MMAVAADTLQR	39	619.855	1237.7	1237.58	93.6554	2 Oxidation (M)
								MMAVAADTLQR	39	611.885	1221.76	1221.58	140.17	Oxidation (M)
								GDGWLTDPYVLTEVDGK	37	933.036	1864.06	1863.89	90.5397
								DGSTIPIAK	36	451.287	900.56	900.492	75.5709
								GNSYFMVEVK	36	587.344	1172.67	1172.55	101.621
								GNSYFMVEVK	33	595.357	1188.7	1188.55	127.223	Oxidation (M)
46	5614	1: gi|532198 angiotensinogen 2: gi|553181 angiotensinogen 3: gi|4557287 angiotensinogen preproprotein [Homo sapiens] 4: gi|15079348 Angiotensinogen (serpin peptidase inhibitor, clade A, member 8) [Homo sapiens] 5: gi|37790798 angiotensinogen (serine (or cysteine) proteinase inhibitor, clade A (alpha-1 antiproteinase, antitr 6: gi|62089124 angiotensinogen precursor variant [Homo sapiens] 7: gi|628…	53121.5	93	100	3	3	SLDFTELDVAAEK	62	719.437	1436.86	1436.7	108.352	"(gi|553181) (gi|4557287) (gi|15079348) (gi|37790798) (gi|62089124) (gi|62897155)
								ALQDQLVLVAAK	50	634.933	1267.85	1267.75	79.6111
								VLSALQAVQGLLVAQGR	46	575.062	1722.17	1722.02	87.091
46	5614	1: gi|4504893 kininogen 1 [Homo sapiens] 2: gi|37748641 Kininogen 1 [Homo sapiens] 3: gi|62898910 kininogen 1 variant [Homo sapiens]	47852.7	91	100	5	4	TVGSDTFYSFK	68	626.358	1250.7	1250.58	95.4108	"(gi|37748641) (gi|62898910)
								DIPTNSPELEETLTHTITK	37	713.783	2138.33	2138.07	118.091
								IGEIKEETTSHLR	35	504.99	1511.95	1511.79	102.46
								QVVAGLNFR	33	501.817	1001.62	1002.56	-938.517
46	5614	1: gi|532198 angiotensinogen 2: gi|553181 angiotensinogen 3: gi|4557287 angiotensinogen preproprotein [Homo sapiens] 4: gi|15079348 Angiotensinogen (serpin peptidase inhibitor, clade A, member 8) [Homo sapiens] 5: gi|37790798 angiotensinogen (serine (or cysteine) proteinase inhibitor, clade A (alpha-1 antiproteinase, antitr 6: gi|62089124 angiotensinogen precursor variant [Homo sapiens] 7: gi|628…	53121.5	112	100	4	4	QPFVQGLALYTPVVLPR	74	949.588	1897.16	1897.08	42.0525	"(gi|553181) (gi|4557287) (gi|15079348) (gi|37790798) (gi|62089124) (gi|62897155)
								SLDFTELDVAAEK	54	719.423	1436.83	1436.7	89.1381
								ADSQAQLLLSTVVGVFTAPGLHLK	38	822.57	2464.69	2464.37	129.292
								FMQAVTGWK	36	534.305	1066.59	1066.53	63.4968
46	5614	1: gi|4504893 kininogen 1 [Homo sapiens] 2: gi|37748641 Kininogen 1 [Homo sapiens] 3: gi|62898910 kininogen 1 variant [Homo sapiens] 4: gi|124056474 Kininogen-1 precursor (Alpha-2-thiol proteinase inhibitor) [Contains: Kininogen-1 heavy chain; Brad	47852.7	92	100	4	3	DIPTNSPELEETLTHTITK	71	713.794	2138.36	2138.07	133.608	"(gi|37748641) (gi|62898910) (gi|124056474)
								YFIDFVAR	47	515.817	1029.62	1029.53	88.5299
								QVVAGLNFR	34	502.339	1002.66	1002.56	103.137
47	2166	1: gi|21071039 carnosinase 1 [Homo sapiens]	56656.1	324	100	18	18	EWVAIESDSVQPVPR	78	856.478	1710.94	1710.86	49.5266	"
								TVFGTEPDMIR	69	633.344	1264.67	1264.61	48.0424
								GTVCFYGHLDVQPADR	61	612.349	1834.03	1833.85	97.9711	Carbamidomethyl (C)
								MMAVAADTLQR	59	603.836	1205.66	1205.59	56.0224
								ALEQDLPVNIK	52	620.388	1238.76	1238.69	60.5851
								GDGWLTDPYVLTEVDGK	48	933.001	1863.99	1863.89	53.3036
								MMAVAADTLQR	44	611.816	1221.62	1221.58	26.2831	Oxidation (M)
								LFAAFFLEMAQLH	43	769.429	1536.84	1536.78	41.0495
								FLFDTKEEILMHLWR	43	660.065	1977.17	1977.02	77.8814
								KPAITYGTR	43	503.816	1005.62	1005.56	56.9981
								YPSLSIHGIEGAFDEPGTK	42	673.377	2017.11	2016.98	64.7429
								TVFGTEPDMIR	42	641.353	1280.69	1280.61	65.5595	Oxidation (M)
								MMAVAADTLQR	41	611.837	1221.66	1221.58	61.3818	Oxidation (M)
								FLFDTK	38	385.729	769.444	769.401	56.0202
								KPAITYGTR	36	503.801	1005.59	1005.56	26.6747
								GNSYFMVEVK	33	587.314	1172.61	1172.55	50.4335
47	2166	1: gi|553181 angiotensinogen 2: gi|532198 angiotensinogen 3: gi|4557287 angiotensinogen preproprotein [Homo sapiens] 4: gi|15079348 Angiotensinogen (serpin peptidase inhibitor, clade A, member 8) [Homo sapiens] 5: gi|37790798 angiotensinogen (serine (or cysteine) proteinase inhibitor, clade A (alpha-1 antiproteinase, antitr 6: gi|62089124 angiotensinogen precursor variant [Homo sapiens] 7: gi|628…	36549.9	143	100	7	7	SLDFTELDVAAEK	67	719.395	1436.78	1436.7	50.2365	"(gi|532198) (gi|4557287) (gi|15079348) (gi|37790798) (gi|62089124) (gi|62897155)
								DPTFIPAPIQAK	52	649.397	1296.78	1296.71	55.9093
								LQAILGVPWK	48	562.88	1123.75	1123.68	62.9888
								FMQAVTGWK	46	534.312	1066.61	1066.53	78.1931
								ADSQAQLLLSTVVGVFTAPGLHLK	46	822.513	2464.52	2464.37	59.7212
								ALQDQLVLVAAK	41	634.912	1267.81	1267.75	46.3475
								QPFVQGLALYTPVVLPR	36	633.402	1897.18	1897.08	53.0177
47	2166	1: gi|21071039 carnosinase 1 [Homo sapiens]	56656.1	211	100	10	7	MMAVAADTLQR	64	619.8	1237.59	1237.58	4.83201	2 Oxidation (M)"
								AIHLDLEEYR	59	629.83	1257.65	1257.64	8.05718
								HLEDVFSK	56	487.75	973.485	973.487	-1.45251
								HLEDVFSKR	48	377.54	1129.6	1129.59	9.03427
								WNYIEGTK	46	505.75	1009.49	1009.49	-1.40071
								KPAITYGTR	38	503.79	1005.57	1005.56	4.72274
								GTVCFYGHLDVQPADR	37	612.29	1833.85	1833.85	0.763968	Carbamidomethyl (C)
47	2166	1: gi|4504893 kininogen 1 [Homo sapiens] 2: gi|37748641 Kininogen 1 [Homo sapiens] 3: gi|62898910 kininogen 1 variant [Homo sapiens] 4: gi|124056474 Kininogen-1 precursor (Alpha-2-thiol proteinase inhibitor) [Contains: Kininogen-1 heavy chain; Brad	47852.7	74	100	2	2	QVVAGLNFR	54	502.29	1002.57	1002.56	4.43165	"(gi|37748641) (gi|62898910) (gi|124056474)
								TVGSDTFYSFK	47	626.3	1250.59	1250.58	2.85387
48	2328	1: gi|416180 Man9-mannosidase [Homo sapiens] 2: gi|24497519 mannosidase, alpha, class 1A, member 1 [Homo sapiens]	70775.9	212	100	9	9	FDGGVEAIATR	71	568.319	1134.62	1134.57	49.1826	"(gi|24497519)
								KMYFDAVQAIETHLIR	62	651.042	1950.1	1950	51.7302	Oxidation (M)
								MYFDAVQAIETHLIR	59	608.343	1822.01	1821.91	54.6531	Oxidation (M)
								VNGGYSGLR	47	461.764	921.513	921.467	50.3393
								GGHSSSLFGNIK	40	602.345	1202.67	1202.6	58.6095
								GYAWGLNELKPISK	39	525.989	1574.95	1574.85	63.1256
								GLPPVDFVPPIGVESREPADAAIR	38	834.836	2501.49	2501.33	63.8261
								EPADAAIR	36	421.746	841.478	841.429	57.5045
								MYFDAVQAIETHLIR	33	603.022	1806.04	1805.91	72.7405
48	2328	1: gi|5080756 Human Fc gamma BP [AA 1-2843] [Homo sapiens] 2: gi|4503681 Fc fragment of IgG binding protein [Homo sapiens]	301609	74	100	2	2	VTLQPYNVAQLQSSVDLSGSK	53	745.435	2233.28	2233.16	55.1488	"(gi|4503681)
								YDLAFVVASQATK	47	706.912	1411.81	1411.73	52.7748
48	2328	1: gi|5802984 UDP-GlcNAc:betaGal beta-1,3-N-acetylglucosaminyltransferase 1 [Homo sapiens]	47088.9	448	100	12	12	TALASGGVLDASGDYR	110	776.916	1551.82	1551.75	41.4757	"
								TALASGGVLDASGDYR	84	776.927	1551.84	1551.75	55.6815
								TALASGGVLDASGDYR	82	776.921	1551.83	1551.75	48.433
								TTMDPNDVILATHASVDNLLHLSGLLER	76	766.188	3060.72	3060.55	55.091	Oxidation (M)
								EEAQLATVLAYALSSHCPDMR	71	788.087	2361.24	2361.11	55.2736	Carbamidomethyl (C)
								WEGPLSVSVFAATK	64	746.426	1490.84	1490.78	40.4507
								EPGEFALLR	59	516.307	1030.6	1030.54	53.7512
								TTMDPNDVILATHASVDNLLHLSGLLER	54	762.202	3044.78	3044.56	71.251
								ISQACELHVAGFDFEVLNEGFLVHK	40	715.645	2858.55	2858.41	51.3041	Carbamidomethyl (C)
								EEAQLATVLAYALSSHCPDMR	40	793.411	2377.21	2377.1	44.5231	Carbamidomethyl (C); Oxidation (M)
								VPTFDER	35	432.228	862.442	862.418	27.0971
								VAMHLVCPSR	34	395.888	1184.64	1184.58	53.1851	Carbamidomethyl (C); Oxidation (M)
49	3360	no data
50	3447	1: gi|32171249 prostaglandin H2 D-isomerase [Homo sapiens] 2: gi|55962673 prostaglandin D2 synthase 21kDa (brain) [Homo sapiens]	21015.3	63	98	2	1	TMLLQPAGSLGSYSYR	67	880.489	1758.96	1758.86	58.5612	Oxidation (M)"(gi|55962673)
51	3546	gi|1621283 hBRAVO/Nr-CAM precursor	143194	76			2	VFNTPEGVPSAPSSLK	37.21	815.48	1628.84	1628.94
								THGMLPGLEPFSHYTLNVR	38.74	547.063	2184.08	2184.22		Oxidation (M)
51	3546	1: gi|410564 beta-trace {N-terminal} [human, cerebrospinal fluid, Peptide Partial, 27 aa]	2891.46	64	95	1	1	APEAQVSVQPNFQQDKFLGR	64	753.778	2258.31	2258.14	73.7513	"
51	3546	1: gi|32171249 prostaglandin H2 D-isomerase [Homo sapiens] 2: gi|55962670 prostaglandin D2 synthase 21kDa (brain) [Homo sapiens] 3: gi|55962671 prostaglandin D2 synthase 21kDa (brain) [Homo sapiens] 4: gi|55962673 prostaglandin D2 synthase 21kDa (brain) [Homo sapiens]	21015.3	53	95	1	1	TMLLQPAGSLGSYSYR	53	587.334	1758.98	1758.86	67.5767	Oxidation (M)"(gi|55962670) (gi|55962671) (gi|55962673)
51	4745	no data
53	3032	1: gi|11056046 immunoglobulin superfamily, member 4B [Homo sapiens] 2: gi|74759761 Immunoglobulin superfamily member 4B precursor (Nectin-like protein 1) (TSLC1-like protein 1) (Syna	46991.4	56	100	3	2	SLVTVLGIPQKPIITGYK	50	643.136	1926.39	1926.16	120.356	"(gi|74759761)
54	3718	1: gi|32171249 prostaglandin H2 D-isomerase [Homo sapiens] 2: gi|55962673 prostaglandin D2 synthase 21kDa (brain) [Homo sapiens]	21015.3	55	100	3	3	TMLLQPAGSLGSYSYR	47	880.5	1758.99	1758.86	70.7418	Oxidation (M)"(gi|55962673)
								AQGFTEDTIVFLPQTDK	39	637.402	1909.18	1908.95	124.443
								FTAFCK	31	387.195	772.375	772.358	21.96	Carbamidomethyl (C)
56	3290	1: gi|409725 carbonic anhydrase IV 2: gi|2554743 Chain A, Human Carbonic Anhydrase Iv 3: gi|4502519 carbonic anhydrase IV precursor [Homo sapiens]	32884	62	95	1	1	QSPINIVTTK	62	550.847	1099.68	1099.62	50.9529	"(gi|2554743) (gi|4502519)
57	4379	1: gi|230651 Chain A, Prealbumin (Human Plasma) 2: gi|443295 Chain A, Transthyretin (Formerly Prealbumin) 3: gi|443297 Chain A, Transthyretin (Formerly Prealbumin) Mutant With Ala 109 Replaced By Thr (A109t) 4: gi|1827569 Chain A, Transthyretin - V122I CARDIOMYOPATHIC MUTANT 5: gi|2098257 Chain A, Tertiary Structures Of Three Amyloidogenic Transthyretin Variants And Implications For Amy 6: gi|209…	13751.9	71	100	3	3	AADDTWEPFASGK	42	697.902	1393.79	1393.61	125.464	"(gi|443295) (gi|443297) (gi|1827569) (gi|2098257) (gi|2098275) (gi|3891451) (gi|3891560) (gi|3891562) (gi|4507725) (gi|4558175) (gi|4558176) (gi|5107791) (gi|14719497) (gi|16975203) (gi|27065112) (gi|48145933) (gi|50513594) (gi|62738386) (gi|62738388) (gi|73535906)
								ALGISPFHEHAEVVFTANDSGPR	39	613.7	2450.77	2450.2	233.904
								GSPAINVAVHVFR	34	456.315	1365.92	1365.75	125.047
57	4379	1: gi|17942890 Chain A, An Engineered Transthyretin Monomer That Is Non-Amyloidogenic - Unless Partially Denatured	13754.8	71	100	3	3	AADDTWEPFASGK	42	697.902	1393.79	1393.61	125.464	"
								ALGISPMHEHAEVVFTANDSGPR	39	613.7	2450.77	2450.16	247.378	Oxidation (M)
								GSPAINVAVHVFR	34	456.315	1365.92	1365.75	125.047
57	4379	gi|39654998 Chain A, Hr1b Domain From Prk1	9054	53			4	MIPATNLSR	22.79	522.304	1043.54	1042.59	911.189	Acetyl (N-term)
								MIPATNLSR	39.17	522.817	1043.54	1043.62	-72.057	Acetyl (N-term)
								CIPATNLSR	5.7	537.308	1072.53	1072.6	-63.6769	Acetyl (N-term); Carbamidomethyl (C)
								CIPATNLSR	14.32	537.325	1072.53	1072.64	-95.559	Acetyl (N-term); Carbamidomethyl (C)
57	4379	gi|34999 unnamed protein product [Homo sapiens] gi|253483 N-cadherin [Homo sapiens] gi|14589889 cadherin 2, type 1 preproprotein [Homo sapiens] gi|22209070 Cadherin 2, type 1, N-cadherin (neuronal) [Homo sapiens]	99802	53			2	SFPLSSEHAK	17.5	551.836	1101.55	1101.66	-100.757
								LSLKPTLTEESVK	35.33	482.343	1443.82	1444.01	-130.055
58	4388	gi|32171249 prostaglandin H2 D-isomerase [Homo sapiens]	21015	87			4	MATLYSR	19.43	421.25	840.416	840.486	-82.3334
								TMLLQPAGSLGSYSYR	27.49	880.523	1758.86	1759.03	-96.9852	Oxidation (M)
								AQGFTEDTIVFLPQTDK	20.79	955.7	1908.95	1909.39	-229.655
								EKFTAFCKAQGFTEDTIVFLPQTDK	19.18	955.7	2863.41	2864.08	-233.234
58	4388	gi|39654998 Chain A, Hr1b Domain From Prk1	9054	75			3	DIPATNLSR	25.11	514.319	1027.53	1026.62	883.577	Acetyl (N-term)
								MIPATNLSR	28.95	522.818	1043.54	1043.62	-75.7937	Acetyl (N-term)
								FIPATNLSR	23.3	530.313	1059.57	1058.61	906.659	Acetyl (N-term)
58	4388	1: gi|443295 Chain A, Transthyretin (Formerly Prealbumin) 2: gi|443297 Chain A, Transthyretin (Formerly Prealbumin) Mutant With Ala 109 Replaced By Thr (A109t) 3: gi|1827569 Chain A, Transthyretin - V122I CARDIOMYOPATHIC MUTANT 4: gi|2098255 Chain A, Tertiary Structures Of Three Amyloidogenic Transthyretin Variants And Implications For Amy 5: gi|2098257 Chain A, Tertiary Structures Of Three Amylo…	13752.9	63	100	4	4	GSPAINVAVHVFR	41	456.317	1365.93	1365.75	129.247	"(gi|443297) (gi|1827569) (gi|2098255) (gi|2098257) (gi|3891451) (gi|3891560) (gi|3891562) (gi|4507725) (gi|14719497) (gi|48145933) (gi|50513594) (gi|55669575) (gi|62738386) (gi|62738388) (gi|73535906) (gi|27065112) (gi|31615374)
								ALGISPFHEHAEVVFTANDSGPR	36	613.646	2450.56	2450.2	146.295
								AADDTWEPFASGK	35	697.888	1393.76	1393.61	105.599
								VEIDTK	31	352.725	703.436	703.375	86.3494
59	2192	1: gi|21071039 carnosinase 1 [Homo sapiens]	56656.1	673	100	23	21	EWVAIESDSVQPVPR	103	856.475	1710.94	1710.86	45.2504	"
								FIIEGMEEAGSVALEELVEKEKDR	101	681.136	2720.51	2720.36	57.2443
								GPVLAWINAVSAFR	89	750.957	1499.9	1499.82	50.1872
								FIIEGMEEAGSVALEELVEKEKDR	82	685.136	2736.52	2736.35	59.6933	Oxidation (M)
								VFQYIDLHQDEFVQTLK	75	708.416	2122.23	2122.07	71.8015
								YPSLSIHGIEGAFDEPGTK	71	673.369	2017.09	2016.98	53.2499
								SVVLIPLGAVDDGEHSQNEK	67	703.066	2106.18	2106.06	55.6793
								GTVCFYGHLDVQPADR	62	612.327	1833.96	1833.85	60.6479	Carbamidomethyl (C)
								ALEQDLPVNIK	62	620.391	1238.77	1238.69	64.6539
								GDGWLTDPYVLTEVDGK	59	932.993	1863.97	1863.89	44.3728
								FIIEGMEEAGSVALEELVEKEK	58	817.461	2449.36	2449.23	53.5985
								FIIEGMEEAGSVALEELVEK	55	731.751	2192.23	2192.09	63.1141
								MMAVAADTLQR	54	603.834	1205.65	1205.59	53.446
								LFAAFFLEMAQLH	52	777.433	1552.85	1552.77	49.2544	Oxidation (M)
								LFAAFFLEMAQLH	45	769.451	1536.89	1536.78	70.502
								TVFGTEPDMIR	42	633.34	1264.67	1264.61	42.8202
								GNSYFMVEVK	42	595.318	1188.62	1188.55	60.9862	Oxidation (M)
								GNSYFMVEVK	39	595.323	1188.63	1188.55	70.0039	Oxidation (M)
								KPAITYGTR	37	503.81	1005.61	1005.56	45.3548
								GNSYFMVEVK	35	587.318	1172.62	1172.55	58.237
								AIHLDLEEYR	31	420.245	1257.71	1257.64	62.8068
59	2192	1: gi|532198 angiotensinogen 2: gi|553181 angiotensinogen 3: gi|4557287 angiotensinogen preproprotein [Homo sapiens] 4: gi|15079348 Angiotensinogen (serpin peptidase inhibitor, clade A, member 8) [Homo sapiens] 5: gi|37790798 angiotensinogen (serine (or cysteine) proteinase inhibitor, clade A (alpha-1 antiproteinase, antitr 6: gi|62089124 angiotensinogen precursor variant [Homo sapiens] 7: gi|628…	53121.5	173	100	9	9	SLDFTELDVAAEK	67	719.392	1436.77	1436.7	45.7053	"(gi|553181) (gi|4557287) (gi|15079348) (gi|37790798) (gi|62089124) (gi|62897155)
								AAMVGMLANFLGFR	63	749.435	1496.86	1496.76	61.9824
								ADSQAQLLLSTVVGVFTAPGLHLK	61	822.515	2464.52	2464.37	62.4322
								DPTFIPAPIQAK	45	649.395	1296.78	1296.71	52.0086
								LDTEDKLR	43	495.294	988.573	988.519	54.3055
								LQAILGVPWK	42	562.872	1123.73	1123.68	47.4078
								FMQAVTGWK	42	534.295	1066.57	1066.53	44.6112
								QPFVQGLALYTPVVLPR	39	633.407	1897.2	1897.08	62.1676
								ALQDQLVLVAAK	38	634.913	1267.81	1267.75	47.9582
59	2192	1: gi|9665262 EGF-containing fibulin-like extracellular matrix protein 1 precursor [Homo sapiens]	54604.2	165	100	6	6	EHIVDLEMLTVSSIGTFR	69	683.062	2046.16	2046.05	57.595	"
								SGNENGEFYLR	50	643.325	1284.64	1284.57	48.8582
								EHIVDLEMLTVSSIGTFR	50	688.394	2062.16	2062.04	57.5168	Oxidation (M)
								ADQVCINLR	47	544.81	1087.61	1087.54	55.9839	Carbamidomethyl (C)
								QTSPVSAMLVLVK	43	694.929	1387.84	1387.77	49.7667	Oxidation (M)
								CVNHYGGYLCLPK	43	527.617	1579.83	1579.73	64.0243	2 Carbamidomethyl (C)
59	2192	1: gi|5531817 secretogranin III [Homo sapiens] 2: gi|15778922 Secretogranin III [Homo sapiens] 3: gi|19557645 secretogranin III [Homo sapiens]	53047.9	136	100	5	5	VTPMAAIQDGLAK	68	657.893	1313.77	1313.7	52.6611	"(gi|15778922) (gi|19557645)
								SSPLDNKLNVEDVDSTK	54	621.015	1860.02	1859.91	60.5819
								EKETLITIMK	43	603.386	1204.76	1204.67	69.0394
								FQDDPDGLHQLDGTPLTAEDIVHK	42	666.116	2660.43	2660.27	60.8742
								TLIDFVK	39	418.272	834.53	834.485	54.3317
59	2192	1: gi|177933 alpha-1-antichymotrypsin precursor 2: gi|1340142 alpha1-antichymotrypsin [Homo sapiens] 3: gi|4165890 alpha-1-antichymotrypsin precursor [Homo sapiens] 4: gi|6980544 Chain A, Alpha1-Antichymotrypsin Serpin In The Delta Conformation (Partial Loop Insertion) 5: gi|21961493 Serpin peptidase inhibitor, clade A (alpha-1 antiproteinase, antitrypsin), member 3 [Homo sapiens] 6: gi|50659080 …	45453.4	113	100	4	4	ITLLSALVETR	83	608.404	1214.79	1214.72	57.6263	"(gi|1340142) (gi|4165890) (gi|6980544) (gi|21961493) (gi|50659080)
								AVLDVFEEGTEASAATAVK	50	636.694	1907.06	1906.95	57.0486
								EQLSLLDR	49	487.299	972.584	972.524	61.9429
								EIGELYLPK	42	531.327	1060.64	1060.58	56.5973
59	2192	1: gi|4504893 kininogen 1 [Homo sapiens] 2: gi|37748641 Kininogen 1 [Homo sapiens] 3: gi|62898910 kininogen 1 variant [Homo sapiens] 4: gi|124056474 Kininogen-1 precursor (Alpha-2-thiol proteinase inhibitor) [Contains: Kininogen-1 heavy chain; Brad	47852.7	100	100	4	4	DIPTNSPELEETLTHTITK	56	713.738	2138.19	2138.07	55.0537	"(gi|37748641) (gi|62898910) (gi|124056474)
								TVGSDTFYSFK	52	626.335	1250.66	1250.58	58.9829
								QVVAGLNFR	40	502.315	1002.61	1002.56	53.8291
								YFIDFVAR	38	515.798	1029.58	1029.53	52.4493
59	2192	1: gi|36573 unnamed protein product [Homo sapiens] 2: gi|36575 unnamed protein product [Homo sapiens] 3: gi|13477169 Vitronectin [Homo sapiens] 4: gi|88853069 vitronectin precursor [Homo sapiens]	54308.1	75	100	2	2	FEDGVLDPDYPR	57	711.874	1421.73	1421.65	60.802	"(gi|36575) (gi|13477169) (gi|88853069)
								DWHGVPGQVDAAMAGR	55	556.292	1665.85	1665.77	51.6116
59	2192	1: gi|4826876 osteomodulin [Homo sapiens]	49460.2	67	99	2	3	LQDIPYNIFNLPNIVELSVGHNK	41	879.861	2636.56	2636.4	62.923	"
								LLLGYNEISK	38	575.372	1148.73	1148.64	74.4904
								LPNLLQLHLEHNNLEEFPFPLPK	34	688.913	2751.62	2751.47	53.8202
59	2192	1: gi|28332 unnamed protein product [Homo sapiens] 2: gi|177809 alpha-1-antichymotrypsin 3: gi|177933 alpha-1-antichymotrypsin precursor 4: gi|1340142 alpha1-antichymotrypsin [Homo sapiens] 5: gi|4165890 alpha-1-antichymotrypsin precursor [Homo sapiens] 6: gi|6980544 Chain A, Alpha1-Antichymotrypsin Serpin In The Delta Conformation (Partial Loop Insertion) 7: gi|15341985 SERPINA3 protein [Homo sa…	25160	78	95	1	1	ITLLSALVETR	78	608.393	1214.77	1214.72	40.2972	"(gi|177809) (gi|177933) (gi|1340142) (gi|4165890) (gi|6980544) (gi|15341985) (gi|21961493) (gi|50659080)
59	2192	1: gi|21071039 carnosinase 1 [Homo sapiens]	56656.1	204	100	9	7	MMAVAADTLQR	65	619.8	1237.59	1237.58	4.83201	2 Oxidation (M)"
								YPSLSIHGIEGAFDEPGTK	56	673.34	2017	2016.98	9.40515
								HLEDVFSKR	56	377.54	1129.6	1129.59	9.03427
								AIHLDLEEYR	55	629.83	1257.65	1257.64	8.05718
								WNYIEGTK	45	505.75	1009.49	1009.49	-1.40071
								HLEDVFSK	44	487.75	973.485	973.487	-1.45251
								KPAITYGTR	39	503.79	1005.57	1005.56	4.72274
59	2192	1: gi|7512417 extracellular protein - human 2: gi|9665262 EGF-containing fibulin-like extracellular matrix protein 1 precursor [Homo sapiens] 3: gi|62088004 EGF-containing fibulin-like extracellular matrix protein 1 isoform b variant [Homo sapiens]	43108.8	201	100	6	5	QTSPVSAMLVLVK	63	694.9	1387.79	1387.77	7.92852	Oxidation (M)"(gi|9665262) (gi|62088004)
								SGNENGEFYLR	62	643.3	1284.59	1284.57	9.3712
								ADQVCINLR	61	544.78	1087.55	1087.54	0.96088	Carbamidomethyl (C)
								LNCEDIDECR	59	662.274	1322.53	1322.52	8.13672	2 Carbamidomethyl (C)
								GSFACQCPPGYQK	59	750.33	1498.65	1498.63	8.11539	2 Carbamidomethyl (C)
59	2192	1: gi|177809 alpha-1-antichymotrypsin 2: gi|177933 alpha-1-antichymotrypsin precursor 3: gi|443345 Chain A, Alpha1 Antichymotrypsin 4: gi|1340142 alpha1-antichymotrypsin [Homo sapiens] 5: gi|2982038 Chain A, Cleaved Antichymotrypsin A349r 6: gi|2982150 Chain A, Cleaved Antichymotrypsin A347r 7: gi|2982165 Chain A, Cleaved Antichymotrypsin T345r 8: gi|4165890 alpha-1-antichymotrypsin precursor [Ho…	48606	158	100	4	4	ADLSGITGAR	96	480.76	959.505	959.504	1.95622	"(gi|177933) (gi|443345) (gi|1340142) (gi|2982038) (gi|2982150) (gi|2982165) (gi|4165890) (gi|6980544) (gi|21961493) (gi|50659080)
								NLAVSQVVHK	67	547.82	1093.63	1093.62	1.00949
								EQLSLLDR	44	487.27	972.525	972.524	1.50228
								EIGELYLPK	38	531.3	1060.59	1060.58	4.74646
59	2192	1: gi|36573 unnamed protein product [Homo sapiens] 2: gi|13477169 Vitronectin [Homo sapiens] 3: gi|88853069 vitronectin precursor [Homo sapiens]	54308.1	107	100	5	5	DWHGVPGQVDAAMAGR	68	561.6	1681.78	1681.76	9.00305	Oxidation (M)"(gi|13477169) (gi|88853069)
								DVWGIEGPIDAAFTR	58	823.92	1645.83	1645.81	9.40631
								QPQFISR	33	438.24	874.465	874.466	-0.722727
								IYISGMAPRPSLAK	32	507.286	1518.84	1518.82	8.14315	Oxidation (M)
								GSQYWR	31	398.69	795.365	795.366	-1.15167
59	2192	1: gi|4504893 kininogen 1 [Homo sapiens] 2: gi|37748641 Kininogen 1 [Homo sapiens] 3: gi|62898910 kininogen 1 variant [Homo sapiens] 4: gi|124056474 Kininogen-1 precursor (Alpha-2-thiol proteinase inhibitor) [Contains: Kininogen-1 heavy chain; Brad	47852.7	79	100	2	2	QVVAGLNFR	57	502.29	1002.57	1002.56	4.43165	"(gi|37748641) (gi|62898910) (gi|124056474)
								TVGSDTFYSFK	50	626.3	1250.59	1250.58	2.85387
59	2192	1: gi|5531817 secretogranin III [Homo sapiens] 2: gi|15778922 Secretogranin III [Homo sapiens] 3: gi|19557645 secretogranin III [Homo sapiens] 4: gi|38197102 SCG3 protein [Homo sapiens]	53047.9	66	100	2	2	GILDKEEAEAIKR	66	491.28	1470.82	1470.8	9.54172	"(gi|15778922) (gi|19557645) (gi|38197102)
								MRDFINK	33	470.24	938.465	938.464	1.16467	Oxidation (M)
60	5336	1: gi|443295 Chain A, Transthyretin (Formerly Prealbumin) 2: gi|2098255 Chain A, Tertiary Structures Of Three Amyloidogenic Transthyretin Variants And Implications For Amy 3: gi|2098257 Chain A, Tertiary Structures Of Three Amyloidogenic Transthyretin Variants And Implications For Amy 4: gi|3891560 Chain A, Tertiary Structures Of Three Amyloidogenic Transthyretin Variants And Implications For Amy…	13752.9	224	100	7	6	AADDTWEPFASGK	76	697.868	1393.72	1393.61	76.7163	"(gi|2098255) (gi|2098257) (gi|3891560) (gi|4507725) (gi|55669575) (gi|62738386) (gi|73535906)
								YTIAALLSPYSYSTTAVVTNPKE	72	830.492	2488.46	2488.27	73.0454
								YTIAALLSPYSYSTTAVVTNPK	55	787.49	2359.45	2359.23	91.398
								GSPAINVAVHVFR	49	456.294	1365.86	1365.75	78.5934
								TSESGELHGLTTEEEFVEGIYK	48	819.122	2454.34	2454.14	81.6057
								TSESGELHGLTTEEEFVEGIYKVEIDTK	31	786	3139.97	3139.51	147.322
61	3009	1: gi|364011 apolipoprotein E mutant E3K 2: gi|4557325 apolipoprotein E precursor [Homo sapiens]	36130.8	91	100	8	7	LGADMEDVCGR	63	611.812	1221.61	1221.51	79.3615	Carbamidomethyl (C)"(gi|4557325)
								LGPLVEQGR	54	484.805	967.595	967.545	51.4426
								AKLEEQAQQIR	49	657.406	1312.8	1312.71	67.414
								DRLDEVKEQVAEVR	44	562.686	1685.04	1684.87	96.1276
								LEEQAQQIR	40	557.836	1113.66	1113.58	72.1072
								SELEEQLTPVAEETR	37	865.99	1729.96	1729.84	73.8827
								ELQAAQAR	36	443.781	885.548	885.467	91.6138
61	3009	1: gi|178855 apolipoprotein J precursor 2: gi|180620 complement cytolysis inhibitor precursor 3: gi|338057 sulfated glycoprotein-2 4: gi|338305 'SP40,40' 5: gi|32891795 clusterin (complement lysis inhibitor, SP-40,40, sulfated glycoprotein 2, testosterone-repressed pr 6: gi|42716297 clusterin isoform 1 [Homo sapiens] 7: gi|42740907 clusterin isoform 2 [Homo sapiens]	48772.1	58	99	2	2	ELDESLQVAER	58	644.886	1287.76	1287.63	97.973	"(gi|180620) (gi|338057) (gi|338305) (gi|32891795) (gi|42716297) (gi|42740907)
								ASSIIDELFQDR	32	697.394	1392.77	1392.69	60.6877
62	3042	1: gi|178849 apolipoprotein E 2: gi|364011 apolipoprotein E mutant E3K 3: gi|4557325 apolipoprotein E precursor [Homo sapiens]	36187.8	65	100	5	5	AATVGSLAGQPLQER	46	749.431	1496.85	1496.79	35.1504	"(gi|364011) (gi|4557325)
								VQAAVGTSAAPVPSDNH	40	810.946	1619.88	1619.79	53.7193
								SELEEQLTPVAEETR	38	866.039	1730.06	1729.84	130.649
								LGADMEDVCGR	35	611.83	1221.65	1221.51	110.199	Carbamidomethyl (C)
62	3042	1: gi|178855 apolipoprotein J precursor 2: gi|180620 complement cytolysis inhibitor precursor 3: gi|32891795 clusterin (complement lysis inhibitor, SP-40,40, sulfated glycoprotein 2, testosterone-repressed pr 4: gi|42740907 clusterin isoform 2 [Homo sapiens] 5: gi|57997569 hypothetical protein [Homo sapiens] 6: gi|338057 sulfated glycoprotein-2 7: gi|42716297 clusterin isoform 1 [Homo sapiens]	48772.1	59	100	3	2	ELDESLQVAER	56	644.948	1287.88	1287.63	195.287	"(gi|180620) (gi|32891795) (gi|42740907) (gi|57997569) (gi|338057) (gi|42716297)
								ASSIIDELFQDR	38	697.413	1392.81	1392.69	88.7959
62	3042	1: gi|364011 apolipoprotein E mutant E3K 2: gi|4557325 apolipoprotein E precursor [Homo sapiens]	36130.8	71	100	9	8	AKLEEQAQQIR	56	657.413	1312.81	1312.71	77.4345	"(gi|4557325)
								LGADMEDVCGR	50	611.807	1221.6	1221.51	72.3063	Carbamidomethyl (C)
								LGPLVEQGR	47	484.819	967.623	967.545	80.3859
								EQVAEVR	42	415.747	829.479	829.429	60.2354
								LQAEAFQAR	40	517.345	1032.68	1032.54	136.637
								GEVQAMLGQSTEELR	37	824.43	1646.85	1646.79	31.8996
								GEVQAMLGQSTEELR	36	832.489	1662.96	1662.79	105.935	Oxidation (M)
								ELQAAQAR	36	443.786	885.557	885.467	101.606
63	3016	1: gi|338305 'SP40,40' 2: gi|178855 apolipoprotein J precursor 3: gi|180620 complement cytolysis inhibitor precursor 4: gi|32891795 clusterin (complement lysis inhibitor, SP-40,40, sulfated glycoprotein 2, testosterone-repressed pr 5: gi|42740907 clusterin isoform 2 [Homo sapiens] 6: gi|338057 sulfated glycoprotein-2 7: gi|42716297 clusterin isoform 1 [Homo sapiens]	36712	52	100	2	1	ELDESLQVAER	56	644.925	1287.83	1287.63	158.382	"(gi|178855) (gi|180620) (gi|32891795) (gi|42740907) (gi|338057) (gi|42716297)
64	3050	1: gi|178855 apolipoprotein J precursor 2: gi|180620 complement cytolysis inhibitor precursor 3: gi|32891795 clusterin (complement lysis inhibitor, SP-40,40, sulfated glycoprotein 2, testosterone-repressed pr 4: gi|42716297 clusterin isoform 1 [Homo sapiens] 5: gi|42740907 clusterin isoform 2 [Homo sapiens]	48772.1	82	100	4	3	ELDESLQVAER	63	644.906	1287.8	1287.63	129.14	"(gi|180620) (gi|32891795) (gi|42716297) (gi|42740907)
								LFDSDPITVTVPVEVSR	54	937.596	1873.18	1872.98	104.081
								EIQNAVNGVK	36	536.341	1070.67	1070.57	88.3378
64	3050	1: gi|178849 apolipoprotein E 2: gi|364011 apolipoprotein E mutant E3K 3: gi|4557325 apolipoprotein E precursor [Homo sapiens]	36187.8	77	100	5	5	LGADMEDVCGR	57	611.809	1221.6	1221.51	75.0095	Carbamidomethyl (C)"(gi|364011) (gi|4557325)
								SELEEQLTPVAEETR	53	866.036	1730.06	1729.84	127.183
								LGPLVEQGR	44	484.825	967.635	967.545	93.0344
								LQAEAFQAR	40	517.331	1032.65	1032.54	108.883
64	3050	1: gi|364011 apolipoprotein E mutant E3K 2: gi|4557325 apolipoprotein E precursor [Homo sapiens]	36130.8	156	100	10	10	LGADMEDVCGR	70	611.834	1221.65	1221.51	116.429	Carbamidomethyl (C)"(gi|4557325)
								GEVQAMLGQSTEELR	61	824.459	1646.9	1646.79	67.0928
								AATVGSLAGQPLQER	51	749.464	1496.91	1496.79	80.0197
								GEVQAMLGQSTEELR	44	832.465	1662.92	1662.79	76.6574	Oxidation (M)
								DRLDEVKEQVAEVR	44	562.704	1685.09	1684.87	128.822
								LQAEAFQAR	43	517.318	1032.62	1032.54	83.7705
								LEEQAQQIR	43	557.836	1113.66	1113.58	72.2689
								ELQAAQAR	37	443.775	885.536	885.467	78.0391
								SELEEQLTPVAEETR	36	865.999	1729.98	1729.84	84.5635
64	3050	1: gi|178855 apolipoprotein J precursor 2: gi|180620 complement cytolysis inhibitor precursor 3: gi|338057 sulfated glycoprotein-2 4: gi|338305 'SP40,40' 5: gi|32891795 clusterin (complement lysis inhibitor, SP-40,40, sulfated glycoprotein 2, testosterone-repressed pr 6: gi|42716297 clusterin isoform 1 [Homo sapiens] 7: gi|42740907 clusterin isoform 2 [Homo sapiens]	48772.1	60	100	3	3	ASSIIDELFQDR	50	697.419	1392.82	1392.69	97.3161	"(gi|180620) (gi|338057) (gi|338305) (gi|32891795) (gi|42716297) (gi|42740907)
								ELDESLQVAER	47	644.868	1287.72	1287.63	70.0535
								VTTVASHTSDSDVPSGVTEVVVK	31	772.148	2313.42	2313.17	109.249
65	3075	1: gi|364011 apolipoprotein E mutant E3K 2: gi|4557325 apolipoprotein E precursor [Homo sapiens]	36130.8	114	100	7	6	LGADMEDVCGR	76	611.84	1221.67	1221.51	126.356	Carbamidomethyl (C)"(gi|4557325)
								AKLEEQAQQIR	61	657.454	1312.89	1312.71	140.332
								LGPLVEQGR	51	484.843	967.672	967.545	131.218
								LAVYQAGAR	41	474.832	947.649	947.519	136.951
								AATVGSLAGQPLQER	31	749.502	1496.99	1496.79	130.354
65	3075	1: gi|178855 apolipoprotein J precursor 2: gi|180620 complement cytolysis inhibitor precursor 3: gi|32891795 clusterin (complement lysis inhibitor, SP-40,40, sulfated glycoprotein 2, testosterone-repressed pr 4: gi|42716297 clusterin isoform 1 [Homo sapiens] 5: gi|42740907 clusterin isoform 2 [Homo sapiens]	48772.1	78	100	3	3	ELDESLQVAER	51	644.876	1287.74	1287.63	82.3085	"(gi|180620) (gi|32891795) (gi|42716297) (gi|42740907)
								LFDSDPITVTVPVEVSR	48	937.606	1873.2	1872.98	114.842
								ASSIIDELFQDR	43	697.415	1392.82	1392.69	91.6723
65	3075	1: gi|364011 apolipoprotein E mutant E3K 2: gi|4557325 apolipoprotein E precursor [Homo sapiens]	36130.8	133	100	11	10	LGADMEDVCGR	63	611.813	1221.61	1221.51	82.2645	Carbamidomethyl (C)"(gi|4557325)
								LGPLVEQGR	53	484.826	967.638	967.545	95.9718
								AATVGSLAGQPLQER	48	749.467	1496.92	1496.79	83.8893
								AKLEEQAQQIR	47	657.412	1312.81	1312.71	75.3045
								SELEEQLTPVAEETR	44	865.993	1729.97	1729.84	78.2207
								VQAAVGTSAAPVPSDNH	40	810.959	1619.9	1619.79	70.1597
								DRLDEVKEQVAEVR	37	562.694	1685.06	1684.87	110.237
								LDEVKEQVAEVR	33	472.312	1413.92	1413.75	119.557
65	3075	1: gi|338305 'SP40,40' 2: gi|178855 apolipoprotein J precursor 3: gi|180620 complement cytolysis inhibitor precursor 4: gi|338057 sulfated glycoprotein-2 5: gi|32891795 clusterin (complement lysis inhibitor, SP-40,40, sulfated glycoprotein 2, testosterone-repressed pr 6: gi|42716297 clusterin isoform 1 [Homo sapiens] 7: gi|42740907 clusterin isoform 2 [Homo sapiens]	36712	73	100	3	3	LFDSDPITVTVPVEVSR	57	937.561	1873.11	1872.98	66.7267	"(gi|178855) (gi|180620) (gi|338057) (gi|32891795) (gi|42716297) (gi|42740907)
								ELDESLQVAER	55	644.915	1287.81	1287.63	143.053
								ASSIIDELFQDR	43	697.363	1392.71	1392.69	15.9296
66	3038	1: gi|178855 apolipoprotein J precursor 2: gi|180620 complement cytolysis inhibitor precursor 3: gi|32891795 clusterin (complement lysis inhibitor, SP-40,40, sulfated glycoprotein 2, testosterone-repressed pr 4: gi|42716297 clusterin isoform 1 [Homo sapiens] 5: gi|42740907 clusterin isoform 2 [Homo sapiens]	48772.1	69	100	3	3	ELDESLQVAER	55	644.901	1287.79	1287.63	122.553	"(gi|180620) (gi|32891795) (gi|42716297) (gi|42740907)
								ASSIIDELFQDR	49	697.427	1392.84	1392.69	108.497
								EIQNAVNGVK	36	536.342	1070.67	1070.57	91.7005
66	3038	1: gi|364011 apolipoprotein E mutant E3K 2: gi|4557325 apolipoprotein E precursor [Homo sapiens]	36130.8	97	100	7	7	LGADMEDVCGR	62	611.81	1221.6	1221.51	76.1671	Carbamidomethyl (C)"(gi|4557325)
								GEVQAMLGQSTEELR	54	824.462	1646.91	1646.79	70.7569
								LDEVKEQVAEVR	50	472.316	1413.93	1413.75	127.215
								LEEQAQQIR	43	557.85	1113.69	1113.58	97.3628
								LQAEAFQAR	40	517.321	1032.63	1032.54	90.2633
								SELEEQLTPVAEETR	31	865.999	1729.98	1729.84	84.8964
67	3301	1: gi|178849 apolipoprotein E 2: gi|178853 apolipoprotein E 3: gi|364011 apolipoprotein E mutant E3K 4: gi|4557325 apolipoprotein E precursor [Homo sapiens]	36187.8	104	100	5	5	SELEEQLTPVAEETR	76	866.026	1730.04	1729.84	116.31	"(gi|178853) (gi|364011) (gi|4557325)
								AATVGSLAGQPLQER	52	749.483	1496.95	1496.79	104.477
								GEVQAMLGQSTEELR	40	555.345	1663.01	1662.79	135.94	Oxidation (M)
								WELALGR	38	422.809	843.604	843.46	170.921
								LGPLVEQGR	33	484.827	967.64	967.545	98.4357
68	3182	1: gi|178849 apolipoprotein E 2: gi|178853 apolipoprotein E 3: gi|364011 apolipoprotein E mutant E3K 4: gi|4557325 apolipoprotein E precursor [Homo sapiens]	36187.8	142	100	4	4	SWFEPLVEDMQR	86	768.908	1535.8	1535.71	61.5723	"(gi|178853) (gi|364011) (gi|4557325)
								WVQTLSEQVQEELLSSQVTQELR	66	910.874	2729.6	2729.39	78.3315
								SELEEQLTPVAEETR	52	865.988	1729.96	1729.84	72.0895
								AYKSELEEQLTPVAEETR	35	698.398	2092.17	2092.03	66.8331
68	3182	1: gi|178849 apolipoprotein E 2: gi|178853 apolipoprotein E 3: gi|364011 apolipoprotein E mutant E3K 4: gi|4557325 apolipoprotein E precursor [Homo sapiens]	36187.8	212	100	8	6	AATVGSLAGQPLQER	76	749.41	1496.81	1496.79	7.21609	"(gi|178853) (gi|364011) (gi|4557325)
								LGPLVEQGR	72	484.78	967.545	967.545	0.433055
								LQAEAFQAR	63	517.28	1032.55	1032.54	9.92315
								LAVYQAGAR	61	474.77	947.525	947.519	7.00144
								AKLEEQAQQIR	41	438.58	1312.72	1312.71	6.32508
								VQAAVGTSAAPVPSDNH	33	810.91	1619.81	1619.79	9.35306
68	3182	1: gi|178855 apolipoprotein J precursor 2: gi|180620 complement cytolysis inhibitor precursor 3: gi|32891795 clusterin (complement lysis inhibitor, SP-40,40, sulfated glycoprotein 2, testosterone-repressed pr 4: gi|42740907 clusterin isoform 2 [Homo sapiens] 5: gi|338057 sulfated glycoprotein-2 6: gi|42716297 clusterin isoform 1 [Homo sapiens]	48772.1	195	100	8	8	ASSIIDELFQDR	85	697.395	1392.77	1392.69	61.8595	"(gi|180620) (gi|32891795) (gi|42740907) (gi|338057) (gi|42716297)
								ELDESLQVAER	78	644.845	1287.68	1287.63	35.2407
								LFDSDPITVTVPVEVSR	72	937.551	1873.09	1872.98	55.599
								TLLSNLEEAK	54	559.339	1116.66	1116.6	54.5628
								VTTVASHTSDSDVPSGVTEVVVK	35	772.117	2313.33	2313.17	68.2561
								VTTVASHTSDSDVPSGVTEVVVK	35	772.11	2313.31	2313.17	59.7989
								VTTVASHTSDSDVPSGVTEVVVK	34	772.119	2313.33	2313.17	70.9563
								VTTVASHTSDSDVPSGVTEVVVK	32	772.112	2313.31	2313.17	62.0503
69	2443	1: gi|532198 angiotensinogen 2: gi|553181 angiotensinogen 3: gi|4557287 angiotensinogen preproprotein [Homo sapiens] 4: gi|15079348 Angiotensinogen (serpin peptidase inhibitor, clade A, member 8) [Homo sapiens] 5: gi|37790798 angiotensinogen (serine (or cysteine) proteinase inhibitor, clade A (alpha-1 antiproteinase, antitr 6: gi|62089124 angiotensinogen precursor variant [Homo sapiens] 7: gi|628…	53121.5	137	100	8	6	SLDFTELDVAAEK	67	719.42	1436.83	1436.7	85.0858	"(gi|553181) (gi|4557287) (gi|15079348) (gi|37790798) (gi|62089124) (gi|62897155)
								VLSALQAVQGLLVAQGR	55	575.072	1722.19	1722.02	103.596
								DPTFIPAPIQAK	54	649.42	1296.83	1296.71	91.3328
								FMQAVTGWK	48	534.309	1066.6	1066.53	71.3297
								ALQDQLVLVAAK	41	634.93	1267.85	1267.75	75.9921
								ADSQAQLLLSTVVGVFTAPGLHLK	36	822.539	2464.59	2464.37	91.5524
69	2443	1: gi|553181 angiotensinogen 2: gi|532198 angiotensinogen 3: gi|4557287 angiotensinogen preproprotein [Homo sapiens] 4: gi|15079348 Angiotensinogen (serpin peptidase inhibitor, clade A, member 8) [Homo sapiens] 5: gi|37790798 angiotensinogen (serine (or cysteine) proteinase inhibitor, clade A (alpha-1 antiproteinase, antitr 6: gi|62089124 angiotensinogen precursor variant [Homo sapiens] 7: gi|628…	36549.9	129	100	6	6	FMQAVTGWK	66	534.305	1066.6	1066.53	63.9881	"(gi|532198) (gi|4557287) (gi|15079348) (gi|37790798) (gi|62089124) (gi|62897155)
								SLDFTELDVAAEK	63	719.397	1436.78	1436.7	53.5163
								DPTFIPAPIQAK	52	649.396	1296.78	1296.71	53.824
								ALQDQLVLVAAK	35	634.915	1267.81	1267.75	51.1244
								QPFVQGLALYTPVVLPR	35	633.424	1897.25	1897.08	87.7526
								ADSQAQLLLSTVVGVFTAPGLHLK	31	822.522	2464.55	2464.37	71.527
70	2493	1: gi|7512417 extracellular protein - human 2: gi|9665262 EGF-containing fibulin-like extracellular matrix protein 1 precursor [Homo sapiens] 3: gi|62088004 EGF-containing fibulin-like extracellular matrix protein 1 isoform b variant [Homo sapiens]	43108.8	119	100	6	6	EHIVDLEMLTVSSIGTFR	64	683.083	2046.23	2046.05	88.6486	"(gi|9665262) (gi|62088004)
								SGNENGEFYLR	56	643.337	1284.66	1284.57	66.6167
								EHIVDLEMLTVSSIGTFR	46	688.413	2062.22	2062.04	86.4178	Oxidation (M)
								QTSPVSAMLVLVK	42	686.935	1371.86	1371.78	55.1838
								ELPQSIVYK	35	538.837	1075.66	1075.59	62.8324
								NNFVIR	35	381.741	761.467	761.418	64.4311
70	2493	1: gi|4503009 carboxypeptidase E precursor [Homo sapiens] 2: gi|6429043 carboxypeptidase E [Homo sapiens]	53117.1	98	100	7	6	LTASAPGYLAITK	51	653.411	1304.81	1304.73	57.0086	"(gi|6429043)
								LQQEDGISFEYHR	46	541.3	1620.88	1620.75	76.5255
								LLIPGNYK	41	459.301	916.588	916.538	54.0228
								ELLVIELSDNPGVHEPGEPEFK	40	816.813	2447.42	2447.22	79.3275
								IVYVNEK	34	432.775	863.535	863.475	68.6852
								IHIMPSLNPDGFEK	32	538.65	1612.93	1612.79	85.3446	Oxidation (M)
71	5621	1: gi|553181 angiotensinogen 2: gi|532198 angiotensinogen 3: gi|4557287 angiotensinogen preproprotein [Homo sapiens]	36549.9	279	100	9	10	VLSALQAVQGLLVAQGR	95	575.076	1722.21	1722.02	110.725	"(gi|532198) (gi|4557287)
								SLDFTELDVAAEK	75	719.41	1436.81	1436.7	71.5228
								LQAILGVPWK	68	562.885	1123.76	1123.68	71.4112
								ALQDQLVLVAAK	68	634.892	1267.77	1267.75	15.4423
								AAMVGMLANFLGFR	51	765.452	1528.89	1528.75	88.9261	2 Oxidation (M)
								FMQAVTGWK	51	534.324	1066.63	1066.53	99.9947
								DPTFIPAPIQAK	45	649.42	1296.83	1296.71	91.0429
								LDTEDKLR	42	495.304	988.594	988.519	75.691
								FMQAVTGWK	40	542.321	1082.63	1082.52	98.3888	Oxidation (M)
								ADSQAQLLLSTVVGVFTAPGLHLK	33	822.58	2464.72	2464.37	141.85
71	5621	1: gi|532198 angiotensinogen 2: gi|553181 angiotensinogen 3: gi|4557287 angiotensinogen preproprotein [Homo sapiens] 4: gi|15079348 Angiotensinogen (serpin peptidase inhibitor, clade A, member 8) [Homo sapiens] 5: gi|37790798 angiotensinogen (serine (or cysteine) proteinase inhibitor, clade A (alpha-1 antiproteinase, antitr 6: gi|62089124 angiotensinogen precursor variant [Homo sapiens] 7: gi|628…	53121.5	225	100	8	8	SLDFTELDVAAEK	75	719.425	1436.84	1436.7	91.57	"(gi|553181) (gi|4557287) (gi|15079348) (gi|37790798) (gi|62089124) (gi|62897155)
								AAMVGMLANFLGFR	67	749.456	1496.9	1496.76	89.4631
								VLSALQAVQGLLVAQGR	63	575.09	1722.25	1722.02	135.643
								DPTFIPAPIQAK	56	649.414	1296.81	1296.71	81.9321
								ALQDQLVLVAAK	48	634.94	1267.86	1267.75	90.3735
								FMQAVTGWK	46	534.326	1066.64	1066.53	103.147
								LQAILGVPWK	38	562.893	1123.77	1123.68	85.8015
								ADSQAQLLLSTVVGVFTAPGLHLK	32	822.576	2464.71	2464.37	136.899
72	5624	1: gi|532198 angiotensinogen 2: gi|553181 angiotensinogen 3: gi|4557287 angiotensinogen preproprotein [Homo sapiens] 4: gi|15079348 Angiotensinogen (serpin peptidase inhibitor, clade A, member 8) [Homo sapiens] 5: gi|37790798 angiotensinogen (serine (or cysteine) proteinase inhibitor, clade A (alpha-1 antiproteinase, antitr 6: gi|62089124 angiotensinogen precursor variant [Homo sapiens] 7: gi|628…	53121.5	243	100	11	11	ALQDQLVLVAAK	71	634.929	1267.84	1267.75	73.1177	"(gi|553181) (gi|4557287) (gi|15079348) (gi|37790798) (gi|62089124) (gi|62897155)
								AAMVGMLANFLGFR	66	749.455	1496.9	1496.76	88.1121
								SLDFTELDVAAEK	64	719.393	1436.77	1436.7	47.5916
								LQAILGVPWK	57	562.905	1123.79	1123.68	106.142
								DPTFIPAPIQAK	57	649.413	1296.81	1296.71	80.1167
								QPFVQGLALYTPVVLPR	55	941.103	1880.19	1880.06	72.0862	Pyro-glu (N-term Q)
								QPFVQGLALYTPVVLPR	47	949.617	1897.22	1897.08	71.8171
								FMQAVTGWK	45	542.314	1082.61	1082.52	85.1955	Oxidation (M)
								FMQAVTGWK	44	534.322	1066.63	1066.53	96.6567
								ADSQAQLLLSTVVGVFTAPGLHLK	33	822.552	2464.63	2464.37	107.781
								LDTEDKLR	31	495.309	988.604	988.519	85.9508
72	5624	1: gi|553181 angiotensinogen 2: gi|532198 angiotensinogen 3: gi|4557287 angiotensinogen preproprotein [Homo sapiens] 4: gi|15079348 Angiotensinogen (serpin peptidase inhibitor, clade A, member 8) [Homo sapiens] 5: gi|37790798 angiotensinogen (serine (or cysteine) proteinase inhibitor, clade A (alpha-1 antiproteinase, antitr 6: gi|62089124 angiotensinogen precursor variant [Homo sapiens] 7: gi|628…	36549.9	240	100	11	11	SLDFTELDVAAEK	74	719.412	1436.81	1436.7	74.2387	"(gi|532198) (gi|4557287) (gi|15079348) (gi|37790798) (gi|62089124) (gi|62897155)
								VLSALQAVQGLLVAQGR	65	575.076	1722.21	1722.02	111.145
								DPTFIPAPIQAK	56	649.422	1296.83	1296.71	93.1359
								FMQAVTGWK	54	534.331	1066.65	1066.53	112.786
								ALQDQLVLVAAK	54	634.901	1267.79	1267.75	28.9781
								ADSQAQLLLSTVVGVFTAPGLHLK	47	822.557	2464.65	2464.37	113.235
								ADSQAQLLLSTVVGVFTAPGLHLK	40	822.562	2464.66	2464.37	119.886
								SLDFTELDVAAEKIDR	35	608.052	1821.14	1820.92	120.685
								LDTEDKLR	35	495.299	988.583	988.519	64.804
								QPFVQGLALYTPVVLPR	32	633.444	1897.31	1897.08	120.226
73	5622	1: gi|553181 angiotensinogen 2: gi|532198 angiotensinogen 3: gi|4557287 angiotensinogen preproprotein [Homo sapiens] 4: gi|15079348 Angiotensinogen (serpin peptidase inhibitor, clade A, member 8) [Homo sapiens] 5: gi|37790798 angiotensinogen (serine (or cysteine) proteinase inhibitor, clade A (alpha-1 antiproteinase, antitr 6: gi|62089124 angiotensinogen precursor variant [Homo sapiens] 7: gi|628…	36549.9	378	100	12	13	SLDFTELDVAAEK	75	719.386	1436.76	1436.7	37.8331	"(gi|532198) (gi|4557287) (gi|15079348) (gi|37790798) (gi|62089124) (gi|62897155)
								VLSALQAVQGLLVAQGR	75	575.079	1722.22	1722.02	116.131
								ALQDQLVLVAAK	72	634.92	1267.83	1267.75	59.3216
								SLDFTELDVAAEKIDR	64	608.046	1821.12	1820.92	110.238
								QPFVQGLALYTPVVLPR	59	949.677	1897.34	1897.08	135.241
								LQAILGVPWK	59	562.896	1123.78	1123.68	90.9934
								AAMVGMLANFLGFR	54	765.457	1528.9	1528.75	96.2301	2 Oxidation (M)
								DPTFIPAPIQAK	53	649.402	1296.79	1296.71	62.8823
								FMQAVTGWK	53	542.315	1082.62	1082.52	86.1156	Oxidation (M)
								FMQAVTGWK	51	534.322	1066.63	1066.53	96.5742
								ANAGKPKDPTFIPAPIQAK	51	655.45	1963.33	1963.09	121.939
								LDTEDKLR	39	495.308	988.602	988.519	84.2027
74	5625	1: gi|532198 angiotensinogen 2: gi|553181 angiotensinogen 3: gi|4557287 angiotensinogen preproprotein [Homo sapiens] 4: gi|15079348 Angiotensinogen (serpin peptidase inhibitor, clade A, member 8) [Homo sapiens] 5: gi|37790798 angiotensinogen (serine (or cysteine) proteinase inhibitor, clade A (alpha-1 antiproteinase, antitr 6: gi|62089124 angiotensinogen precursor variant [Homo sapiens] 7: gi|628…	53121.5	302	100	11	11	SLDFTELDVAAEK	80	719.418	1436.82	1436.7	82.0121	"(gi|553181) (gi|4557287) (gi|15079348) (gi|37790798) (gi|62089124) (gi|62897155)
								VLSALQAVQGLLVAQGR	75	575.084	1722.23	1722.02	124.688
								ALQDQLVLVAAK	73	634.921	1267.83	1267.75	60.478
								QPFVQGLALYTPVVLPR	61	941.12	1880.22	1880.06	89.7878	Pyro-glu (N-term Q)
								ADSQAQLLLSTVVGVFTAPGLHLK	61	822.589	2464.74	2464.37	152.247
								AAMVGMLANFLGFR	59	749.6	1497.19	1496.76	282.159
								LQAILGVPWK	51	562.891	1123.77	1123.68	81.8341
								QPFVQGLALYTPVVLPR	50	633.438	1897.29	1897.08	110.988
								FMQAVTGWK	45	542.304	1082.59	1082.52	66.0532	Oxidation (M)
								LDTEDKLR	41	495.302	988.59	988.519	72.12
								DPTFIPAPIQAK	41	649.402	1296.79	1296.71	62.3348
74	5625	1: gi|553181 angiotensinogen 2: gi|532198 angiotensinogen 3: gi|4557287 angiotensinogen preproprotein [Homo sapiens] 4: gi|15079348 Angiotensinogen (serpin peptidase inhibitor, clade A, member 8) [Homo sapiens] 5: gi|37790798 angiotensinogen (serine (or cysteine) proteinase inhibitor, clade A (alpha-1 antiproteinase, antitr 6: gi|62089124 angiotensinogen precursor variant [Homo sapiens] 7: gi|628…	36549.9	208	100	8	8	SLDFTELDVAAEK	74	719.42	1436.83	1436.7	84.7851	"(gi|532198) (gi|4557287) (gi|15079348) (gi|37790798) (gi|62089124) (gi|62897155)
								ALQDQLVLVAAK	64	634.918	1267.82	1267.75	56.6886
								DPTFIPAPIQAK	62	649.42	1296.82	1296.71	90.045
								SLDFTELDVAAEKIDR	56	608.053	1821.14	1820.92	121.196
								FMQAVTGWK	42	534.318	1066.62	1066.53	87.7868
								LDTEDKLR	39	495.294	988.574	988.519	55.746
								VLSALQAVQGLLVAQGR	38	575.076	1722.21	1722.02	111.814
								ADSQAQLLLSTVVGVFTAPGLHLK	36	822.582	2464.72	2464.37	144.339
75	5627	no data
76	2849	1: gi|4557325 apolipoprotein E precursor [Homo sapiens]	36132	78	94	2	2	LGPLVEQGR	25	484.811	967.608	967.545	65.1133
								LQAEAFQAR	18	517.31	1032.61	1032.54	68.5691
								AATVGSLAGQPLQER	35	749.439	1496.86	1496.79	46.0317
77	5009	1: gi|443295 Chain A, Transthyretin (Formerly Prealbumin) 2: gi|2098255 Chain A, Tertiary Structures Of Three Amyloidogenic Transthyretin Variants And Implications For Amy 3: gi|2098257 Chain A, Tertiary Structures Of Three Amyloidogenic Transthyretin Variants And Implications For Amy 4: gi|3891560 Chain A, Tertiary Structures Of Three Amyloidogenic Transthyretin Variants And Implications For Amy…	13752.9	332	100	11	11	YTIAALLSPYSYSTTAVVTNPKE	79	830.492	2488.45	2488.27	72.3389	"(gi|2098255) (gi|2098257) (gi|3891560) (gi|4507725) (gi|62738386) (gi|73535906) (gi|55669575)
								RYTIAALLSPYSYSTTAVVTNPKE	77	882.523	2644.55	2644.37	65.4064
								AADDTWEPFASGK	55	697.861	1393.71	1393.61	66.2959
								GSPAINVAVHVFR	55	456.291	1365.85	1365.75	73.304
								GSPAINVAVHVFRK	48	498.999	1493.97	1493.85	85.7786
								YTIAALLSPYSYSTTAVVTNPK	45	787.488	2359.44	2359.23	89.6508
								TSESGELHGLTTEEEFVEGIYKVEIDTK	45	785.932	3139.7	3139.51	61.3163
								RYTIAALLSPYSYSTTAVVTNPK	42	839.509	2515.5	2515.33	68.5886
								ALGISPFHEHAEVVFTANDSGPR	42	613.609	2450.41	2450.2	85.9604
								ALGISPFHEHAEVVFTANDSGPRR	37	652.635	2606.51	2606.3	81.9027
								TSESGELHGLTTEEEFVEGIYK	37	819.11	2454.31	2454.14	67.384
78	5033	1: gi|443295 Chain A, Transthyretin (Formerly Prealbumin) 2: gi|2098255 Chain A, Tertiary Structures Of Three Amyloidogenic Transthyretin Variants And Implications For Amy 3: gi|2098257 Chain A, Tertiary Structures Of Three Amyloidogenic Transthyretin Variants And Implications For Amy 4: gi|3891560 Chain A, Tertiary Structures Of Three Amyloidogenic Transthyretin Variants And Implications For Amy…	13752.9	211	100	7	7	RYTIAALLSPYSYSTTAVVTNPKE	71	882.532	2644.57	2644.37	74.843	"(gi|2098255) (gi|2098257) (gi|3891560) (gi|4507725) (gi|62738386) (gi|73535906) (gi|55669575)
								YTIAALLSPYSYSTTAVVTNPKE	68	830.496	2488.47	2488.27	77.6028
								AADDTWEPFASGK	63	697.866	1393.72	1393.61	73.2792
								YTIAALLSPYSYSTTAVVTNPK	47	787.475	2359.4	2359.23	72.5147
								GSPAINVAVHVFR	38	456.297	1365.87	1365.75	85.6027
								TSESGELHGLTTEEEFVEGIYKVEIDTK	37	785.95	3139.77	3139.51	82.991
								ALGISPFHEHAEVVFTANDSGPR	35	613.612	2450.42	2450.2	89.9095
79	5078	1: gi|443295 Chain A, Transthyretin (Formerly Prealbumin) 2: gi|2098255 Chain A, Tertiary Structures Of Three Amyloidogenic Transthyretin Variants And Implications For Amy 3: gi|2098257 Chain A, Tertiary Structures Of Three Amyloidogenic Transthyretin Variants And Implications For Amy 4: gi|3891560 Chain A, Tertiary Structures Of Three Amyloidogenic Transthyretin Variants And Implications For Amy…	13752.9	277	100	9	9	RYTIAALLSPYSYSTTAVVTNPKE	59	882.526	2644.56	2644.37	68.2857	"(gi|2098255) (gi|2098257) (gi|3891560) (gi|4507725) (gi|62738386) (gi|73535906) (gi|55669575)
								YTIAALLSPYSYSTTAVVTNPK	57	787.477	2359.41	2359.23	75.2169
								AADDTWEPFASGK	56	697.866	1393.72	1393.61	74.2135
								TSESGELHGLTTEEEFVEGIYK	55	819.111	2454.31	2454.14	68.5343
								YTIAALLSPYSYSTTAVVTNPKE	54	830.488	2488.44	2488.27	68.0781
								GSPAINVAVHVFR	48	456.295	1365.86	1365.75	82.5494
								GSPAINVAVHVFRK	46	498.996	1493.97	1493.85	80.5089
								ALGISPFHEHAEVVFTANDSGPR	40	613.61	2450.41	2450.2	87.0069
								ALGISPFHEHAEVVFTANDSGPRR	36	652.635	2606.51	2606.3	81.4346
80	2958	1: gi|4504067 aspartate aminotransferase 1 [Homo sapiens]	46219	56	77	1	1	LALGDDSPALK	18	550.344	1098.67	1098.59	73.6397
								VGGVQSLGGTGALR	37	636.41	1270.8	1270.7	82.8678
81	3657	1: gi|32171249 prostaglandin H2 D-isomerase [Homo sapiens] 2: gi|55962673 prostaglandin D2 synthase 21kDa (brain) [Homo sapiens]	21015.3	52	100	5	5	MATLYSR	42	421.26	840.506	840.416	107.031	"(gi|55962673)
								TMLLQPAGSLGSYSYR	39	880.53	1759.05	1758.86	104.776	Oxidation (M)
								AQGFTEDTIVFLPQTDK	35	955.544	1909.07	1908.95	66.676
								GPGEDFR	31	389.216	776.418	776.345	93.6774
82	3867	no data
83	3176	1: gi|178849 apolipoprotein E 2: gi|364011 apolipoprotein E mutant E3K 3: gi|4557325 apolipoprotein E precursor [Homo sapiens]	36187.8	143	100	12	10	SELEEQLTPVAEETR	76	866.008	1730	1729.84	94.7771	"(gi|364011) (gi|4557325)
								SWFEPLVEDMQR	60	768.93	1535.85	1535.71	89.868
								LGPLVEQGR	55	484.834	967.654	967.545	113.065
								LGADMEDVCGR	44	611.9	1221.79	1221.51	224.053	Carbamidomethyl (C)
								AATVGSLAGQPLQER	42	749.478	1496.94	1496.79	97.5839
								LAVYQAGAR	41	474.805	947.595	947.519	80.1652
								VQAAVGTSAAPVPSDNH	39	810.982	1619.95	1619.79	98.6436
								AKLEEQAQQIR	38	657.401	1312.79	1312.71	59.6621
								GEVQAMLGQSTEELR	35	824.489	1646.96	1646.79	102.952
83	3176	1: gi|338305 'SP40,40' 2: gi|178855 apolipoprotein J precursor 3: gi|180620 complement cytolysis inhibitor precursor 4: gi|32891795 clusterin (complement lysis inhibitor, SP-40,40, sulfated glycoprotein 2, testosterone-repressed pr 5: gi|42716297 clusterin isoform 1 [Homo sapiens] 6: gi|42740907 clusterin isoform 2 [Homo sapiens] 7: gi|338057 sulfated glycoprotein-2	36712	72	100	2	2	ELDESLQVAER	56	644.884	1287.75	1287.63	95.0358	"(gi|178855) (gi|180620) (gi|32891795) (gi|42716297) (gi|42740907) (gi|338057)
								ASSIIDELFQDR	49	697.428	1392.84	1392.69	110.284
83	3176	1: gi|364011 apolipoprotein E mutant E3K 2: gi|4557325 apolipoprotein E precursor [Homo sapiens]	36130.8	123	100	13	10	LQAEAFQAR	56	517.354	1032.69	1032.54	153.515	"(gi|4557325)
								SELEEQLTPVAEETR	55	865.999	1729.98	1729.84	84.2524
								LGADMEDVCGR	53	611.838	1221.66	1221.51	121.915	Carbamidomethyl (C)
								LGPLVEQGR	41	484.834	967.653	967.545	111.293
								AATVGSLAGQPLQER	36	749.473	1496.93	1496.79	90.8294
								GEVQAMLGQSTEELR	36	824.447	1646.88	1646.79	52.8336
								WELALGR	36	422.777	843.539	843.46	93.203
								DRLDEVKEQVAEVR	34	562.74	1685.2	1684.87	192.548
								AKLEEQAQQIR	33	657.417	1312.82	1312.71	83.0412
83	3176	1: gi|364011 apolipoprotein E mutant E3K 2: gi|4557325 apolipoprotein E precursor [Homo sapiens]	36130.8	236	100	17	17	LGADMEDVCGR	69	611.819	1221.62	1221.51	91.1796	Carbamidomethyl (C)"(gi|4557325)
								LEEQAQQIR	57	557.846	1113.68	1113.58	89.3992
								LAVYQAGAR	53	474.807	947.599	947.519	84.5872
								SELEEQLTPVAEETR	51	866.005	1729.99	1729.84	91.2358
								AATVGSLAGQPLQER	51	749.468	1496.92	1496.79	84.9529
								SWFEPLVEDMQR	50	768.926	1535.84	1535.71	83.9137
								WVQTLSEQVQEELLSSQVTQELR	50	911.1	2730.28	2729.39	326.462
								LQAEAFQAR	48	517.36	1032.71	1032.54	165.761
								AKLEEQAQQIR	47	657.409	1312.8	1312.71	71.6007
								DRLDEVKEQVAEVR	43	562.712	1685.11	1684.87	142.219
								GEVQAMLGQSTEELR	38	832.471	1662.93	1662.79	83.7383	Oxidation (M)
								ALMDETMK	36	469.783	937.552	937.425	135.164
								AYKSELEEQLTPVAEETR	31	698.453	2092.34	2092.03	145.738
								LGPLVEQGR	44	484.806	967.598	967.545	54.7582
								EQVAEVR	43	415.765	829.515	829.429	103.817
								GEVQAMLGQSTEELR	37	824.5	1646.99	1646.79	116.712
								DRLDEVKEQVAEVR	34	562.699	1685.07	1684.87	118.787
84	3228	1: gi|178849 apolipoprotein E 2: gi|364011 apolipoprotein E mutant E3K 3: gi|4557325 apolipoprotein E precursor [Homo sapiens]	36187.8	99	100	5	6	LGADMEDVCGR	75	611.801	1221.59	1221.51	62.3645	Carbamidomethyl (C)"(gi|364011) (gi|4557325)
								GEVQAMLGQSTEELR	43	824.43	1646.85	1646.79	32.0866
								LQAEAFQAR	39	517.296	1032.58	1032.54	40.6049
								SELEEQLTPVAEETR	36	866.1	1730.19	1729.84	201.448
								AKLEEQAQQIR	33	657.407	1312.8	1312.71	67.6486
								DRLDEVKEQVAEVR	31	562.729	1685.17	1684.87	173.419
84	3228	1: gi|443295 Chain A, Transthyretin (Formerly Prealbumin) 2: gi|443297 Chain A, Transthyretin (Formerly Prealbumin) Mutant With Ala 109 Replaced By Thr (A109t) 3: gi|1827569 Chain A, Transthyretin - V122I CARDIOMYOPATHIC MUTANT 4: gi|2098255 Chain A, Tertiary Structures Of Three Amyloidogenic Transthyretin Variants And Implications For Amy 5: gi|2098257 Chain A, Tertiary Structures Of Three Amylo…	13752.9	65	100	3	2	TSESGELHGLTTEEEFVEGIYK	49	819.3	2454.88	2454.14	299.263	"(gi|443297) (gi|1827569) (gi|2098255) (gi|2098257) (gi|3891451) (gi|3891560) (gi|3891562) (gi|4507725) (gi|14719497) (gi|48145933) (gi|50513594) (gi|55669575) (gi|62738386) (gi|62738388) (gi|73535906) (gi|27065112) (gi|31615374)
								AADDTWEPFASGK	38	697.885	1393.76	1393.61	101.311
84	3228	1: gi|364011 apolipoprotein E mutant E3K 2: gi|4557325 apolipoprotein E precursor [Homo sapiens]	36130.8	176	100	17	18	LGADMEDVCGR	61	611.826	1221.64	1221.51	102.436	Carbamidomethyl (C)"(gi|4557325)
								AATVGSLAGQPLQER	60	749.456	1496.9	1496.79	68.7957
								SELEEQLTPVAEETR	59	866.006	1730	1729.84	92.5792
								LEEQAQQIR	58	557.841	1113.67	1113.58	81.3854
								LQAEAFQAR	57	517.319	1032.62	1032.54	84.9172
								LGPLVEQGR	49	484.826	967.638	967.545	96.0627
								LAVYQAGAR	48	474.808	947.602	947.519	87.3988
								AKLEEQAQQIR	41	657.427	1312.84	1312.71	99.383
								LDEVKEQVAEVR	39	472.318	1413.93	1413.75	130.755
								DRLDEVKEQVAEVR	38	562.709	1685.1	1684.87	136.559
								ELQAAQAR	36	443.797	885.579	885.467	126.31
								QQTEWQSGQR	31	624.316	1246.62	1246.57	38.1704
								DADDLQKR	31	480.786	959.557	959.467	93.3403
								GEVQAMLGQSTEELR	31	832.48	1662.94	1662.79	94.0811	Oxidation (M)
84	3228	1: gi|443295 Chain A, Transthyretin (Formerly Prealbumin) 2: gi|2098257 Chain A, Tertiary Structures Of Three Amyloidogenic Transthyretin Variants And Implications For Amy 3: gi|62738386 Chain A, The X-Ray Crystallographic Structure Of The Amyloidogenic Variant Ttr Tyr78phe 4: gi|73535906 Chain A, Crystal Structure Of Human Transthyretin With Bound Iodide	13752.9	94	100	6	6	GSPAINVAVHVFR	45	456.307	1365.9	1365.75	106.969	"(gi|2098257) (gi|62738386) (gi|73535906)
								YTIAALLSPYSYSTTAVVTNPKE	44	830.526	2488.56	2488.27	113.759
								GPTGTGESK	43	417.24	832.466	832.393	87.9225
								ALGISPFHEHAEVVFTANDSGPR	43	613.638	2450.52	2450.2	132.197
								GSPAINVAVHVFR	35	683.964	1365.91	1365.75	118.13
								CPLMVK	32	374.232	746.449	746.382	89.3082	Carbamidomethyl (C)
85	3074	1: gi|178855 apolipoprotein J precursor 2: gi|180620 complement cytolysis inhibitor precursor 3: gi|32891795 clusterin (complement lysis inhibitor, SP-40,40, sulfated glycoprotein 2, testosterone-repressed pr 4: gi|42716297 clusterin isoform 1 [Homo sapiens] 5: gi|42740907 clusterin isoform 2 [Homo sapiens]	48772.1	77	100	3	3	ELDESLQVAER	57	644.881	1287.75	1287.63	90.5764	"(gi|180620) (gi|32891795) (gi|42716297) (gi|42740907)
								ASSIIDELFQDR	49	697.436	1392.86	1392.69	121.896
								LFDSDPITVTVPVEVSR	39	937.596	1873.18	1872.98	104.02
85	3074	1: gi|178853 apolipoprotein E 2: gi|364011 apolipoprotein E mutant E3K 3: gi|4557325 apolipoprotein E precursor [Homo sapiens]	36184.8	308	100	12	11	LAVYQAGAR	71	474.77	947.525	947.519	7.00144	"(gi|364011) (gi|4557325)
								AATVGSLAGQPLQER	71	749.41	1496.81	1496.79	7.21609
								LGPLVEQGR	70	484.78	967.545	967.545	0.433055
								LQAEAFQAR	62	517.28	1032.55	1032.54	9.92315
								LEEQAQQIR	61	557.8	1113.59	1113.58	6.86346
								DADDLQKR	58	480.74	959.465	959.467	-1.83539
								VQAAVGTSAAPVPSDNH	51	810.91	1619.81	1619.79	9.35306
								AKLEEQAQQIR	42	438.58	1312.72	1312.71	6.32508
								AQAWGER	42	409.2	816.385	816.388	-2.90181
								QWAGLVEK	38	465.76	929.505	929.497	9.06189
								LASHLRK	36	412.76	823.505	823.503	3.22525
85	3074	1: gi|178855 apolipoprotein J precursor 2: gi|180620 complement cytolysis inhibitor precursor 3: gi|338057 sulfated glycoprotein-2 4: gi|338305 'SP40,40' 5: gi|32891795 clusterin (complement lysis inhibitor, SP-40,40, sulfated glycoprotein 2, testosterone-repressed pr 6: gi|42716297 clusterin isoform 1 [Homo sapiens] 7: gi|42740907 clusterin isoform 2 [Homo sapiens] 8: gi|57997569 hypothetical pr…	48772.1	57	98	2	1	ELDESLQVAER	57	644.88	1287.74	1287.63	88.52	"(gi|180620) (gi|338057) (gi|338305) (gi|32891795) (gi|42716297) (gi|42740907) (gi|57997569)
86	5647	1: gi|364011 apolipoprotein E mutant E3K 2: gi|4557325 apolipoprotein E precursor [Homo sapiens]	36130.8	83	100	9	8	SELEEQLTPVAEETR	70	865.996	1729.98	1729.84	81.0279	"(gi|4557325)
								LGADMEDVCGR	45	619.796	1237.58	1237.51	57.0623	Carbamidomethyl (C); Oxidation (M)
								ELQAAQAR	42	443.779	885.544	885.467	86.7125
								DADDLQKR	41	480.783	959.55	959.467	86.7992
								WELALGR	34	422.776	843.538	843.46	91.8941
								LDEVKEQVAEVR	33	472.322	1413.94	1413.75	140.474
87	3224	1: gi|178849 apolipoprotein E 2: gi|364011 apolipoprotein E mutant E3K 3: gi|4557325 apolipoprotein E precursor [Homo sapiens]	36187.8	138	100	7	7	VQAAVGTSAAPVPSDNH	72	810.982	1619.95	1619.79	97.9534	"(gi|364011) (gi|4557325)
								AATVGSLAGQPLQER	59	749.488	1496.96	1496.79	110.999
								LGADMEDVCGR	50	611.83	1221.65	1221.51	110.136	Carbamidomethyl (C)
								SELEEQLTPVAEETR	40	866.1	1730.19	1729.84	201.448
								LAVYQAGAR	35	474.838	947.661	947.519	149.675
								GEVQAMLGQSTEELR	35	824.48	1646.95	1646.79	92.858
87	3224	1: gi|364011 apolipoprotein E mutant E3K 2: gi|4557325 apolipoprotein E precursor [Homo sapiens]	36130.8	454	100	20	20	VQAAVGTSAAPVPSDNH	101	810.958	1619.9	1619.79	68.9707	"(gi|4557325)
								LGADMEDVCGR	82	611.838	1221.66	1221.51	122.39	Carbamidomethyl (C)
								AATVGSLAGQPLQER	78	749.453	1496.89	1496.79	64.6067
								AKLEEQAQQIR	69	657.399	1312.78	1312.71	56.007
								SWFEPLVEDMQR	67	768.938	1535.86	1535.71	100.388
								DADDLQKR	67	480.779	959.544	959.467	80.1205
								GEVQAMLGQSTEELR	65	824.471	1646.93	1646.79	80.9148
								LDEVKEQVAEVR	61	472.311	1413.91	1413.75	117.479
								LGADMEDVCGR	59	619.815	1237.62	1237.51	87.7401	Carbamidomethyl (C); Oxidation (M)
								SELEEQLTPVAEETR	56	865.988	1729.96	1729.84	72.1819
								LGPLVEQGR	53	484.827	967.64	967.545	98.2394
								LAVYQAGAR	49	474.786	947.557	947.519	40.3623
								LEEQAQQIR	48	557.85	1113.69	1113.58	96.5923
								QQTEWQSGQR	47	624.36	1246.7	1246.57	109.01
								DRLDEVKEQVAEVR	45	562.7	1685.08	1684.87	120.578
								AYKSELEEQLTPVAEETR	44	698.434	2092.28	2092.03	117.819
								ALMDETMK	41	469.765	937.515	937.425	96.4387
								QWAGLVEK	34	465.793	929.571	929.497	79.8313
								EQVAEVR	31	415.76	829.505	829.429	91.5099
87	3224	1: gi|443295 Chain A, Transthyretin (Formerly Prealbumin) 2: gi|2098257 Chain A, Tertiary Structures Of Three Amyloidogenic Transthyretin Variants And Implications For Amy 3: gi|62738386 Chain A, The X-Ray Crystallographic Structure Of The Amyloidogenic Variant Ttr Tyr78phe 4: gi|73535906 Chain A, Crystal Structure Of Human Transthyretin With Bound Iodide	13752.9	282	100	10	9	AADDTWEPFASGK	80	697.878	1393.74	1393.61	90.1031	"(gi|2098257) (gi|62738386) (gi|73535906)
								RYTIAALLSPYSYSTTAVVTNPKE	74	882.563	2644.67	2644.37	110.575
								TSESGELHGLTTEEEFVEGIYK	57	819.131	2454.37	2454.14	92.814
								GSPAINVAVHVFR	47	456.297	1365.87	1365.75	86.455
								ALGISPFHEHAEVVFTANDSGPR	47	613.624	2450.47	2450.2	110.642
								KAADDTWEPFASGK	42	508.302	1521.89	1521.71	115.101
								YTIAALLSPYSYSTTAVVTNPK	42	787.503	2359.49	2359.23	108.643
								YTIAALLSPYSYSTTAVVTNPKE	37	830.519	2488.54	2488.27	105.376
								VEIDTK	32	352.73	703.446	703.375	100.001
87	3224	1: gi|338305 'SP40,40' 2: gi|178855 apolipoprotein J precursor 3: gi|180620 complement cytolysis inhibitor precursor 4: gi|32891795 clusterin (complement lysis inhibitor, SP-40,40, sulfated glycoprotein 2, testosterone-repressed pr 5: gi|42740907 clusterin isoform 2 [Homo sapiens] 6: gi|338057 sulfated glycoprotein-2 7: gi|42716297 clusterin isoform 1 [Homo sapiens]	36712	83	100	2	2	ELDESLQVAER	68	644.892	1287.77	1287.63	107.931	"(gi|178855) (gi|180620) (gi|32891795) (gi|42740907) (gi|338057) (gi|42716297)
								RPHFFFPK	43	359.252	1074.73	1074.58	145.852
88	3126	1: gi|178849 apolipoprotein E 2: gi|364011 apolipoprotein E mutant E3K 3: gi|4557325 apolipoprotein E precursor [Homo sapiens]	36187.8	233	100	10	12	VQAAVGTSAAPVPSDNH	90	810.978	1619.94	1619.79	93.7072	"(gi|364011) (gi|4557325)
								GEVQAMLGQSTEELR	75	824.448	1646.88	1646.79	54.0796
								SELEEQLTPVAEETR	63	865.997	1729.98	1729.84	82.8835
								AKLEEQAQQIR	57	657.6	1313.19	1312.71	362.288
								LGADMEDVCGR	57	611.826	1221.64	1221.51	103.564	Carbamidomethyl (C)
								LAVYQAGAR	54	474.81	947.606	947.519	91.6098
								LGPLVEQGR	46	484.832	967.649	967.545	107.324
								DRLDEVKEQVAEVR	39	562.711	1685.11	1684.87	140.043
								AATVGSLAGQPLQER	33	749.475	1496.94	1496.79	94.5681
								WELALGR	33	422.78	843.545	843.46	100.95
88	3126	1: gi|364011 apolipoprotein E mutant E3K 2: gi|4557325 apolipoprotein E precursor [Homo sapiens]	36130.8	122	100	12	11	LGADMEDVCGR	65	611.819	1221.62	1221.51	91.9721	Carbamidomethyl (C)"(gi|4557325)
								AKLEEQAQQIR	51	657.423	1312.83	1312.71	92.8545
								SELEEQLTPVAEETR	41	865.998	1729.98	1729.84	83.9761
								AATVGSLAGQPLQER	40	749.474	1496.93	1496.79	93.3254
								LDEVKEQVAEVR	37	472.305	1413.89	1413.75	104.69
								LGPLVEQGR	36	484.851	967.687	967.545	146.839
								DRLDEVKEQVAEVR	35	562.709	1685.11	1684.87	136.922
								GEVQAMLGQSTEELR	34	824.474	1646.93	1646.79	84.6275
								DADDLQKR	32	480.792	959.569	959.467	105.933
								WELALGR	32	422.776	843.537	843.46	90.9503
88	3126	1: gi|178855 apolipoprotein J precursor 2: gi|180620 complement cytolysis inhibitor precursor 3: gi|338057 sulfated glycoprotein-2 4: gi|338305 'SP40,40' 5: gi|32891795 clusterin (complement lysis inhibitor, SP-40,40, sulfated glycoprotein 2, testosterone-repressed pr 6: gi|42716297 clusterin isoform 1 [Homo sapiens] 7: gi|42740907 clusterin isoform 2 [Homo sapiens] 8: gi|57997569 hypothetical pr…	48772.1	66	100	2	2	ASSIIDELFQDR	50	697.407	1392.8	1392.69	80.0315	"(gi|180620) (gi|338057) (gi|338305) (gi|32891795) (gi|42716297) (gi|42740907) (gi|57997569)
								ELDESLQVAER	50	644.909	1287.8	1287.63	134.667
89	5297	no data
90	3083	1: gi|178849 apolipoprotein E 2: gi|178853 apolipoprotein E 3: gi|364011 apolipoprotein E mutant E3K 4: gi|4557325 apolipoprotein E precursor [Homo sapiens]	36187.8	77	100	4	4	SELEEQLTPVAEETR	69	866.053	1730.09	1729.84	147.107	"(gi|178853) (gi|364011) (gi|4557325)
								GEVQAMLGQSTEELR	36	832.524	1663.03	1662.79	147.36	Oxidation (M)
								DRLDEVKEQVAEVR	34	562.727	1685.16	1684.87	168.236
								LQAEAFQAR	32	517.341	1032.67	1032.54	127.343
91	2218	1: gi|112911 Alpha-2-macroglobulin precursor (Alpha-2-M) 2: gi|46812315 alpha 2 macroglobulin [Homo sapiens] 3: gi|51476396 hypothetical protein [Homo sapiens] 4: gi|66932947 alpha-2-macroglobulin precursor [Homo sapiens] 5: gi|62088808 Alpha 2 macroglobulin variant [Homo sapiens]	163175	434	100	19	18	ALLAYAFALAGNQDK	83	783.457	1564.9	1564.82	48.0162	"(gi|46812315) (gi|51476396) (gi|66932947) (gi|62088808)
								QQNAQGGFSSTQDTVVALHALSK	80	796.444	2386.31	2386.19	51.2009
								ALLAYAFALAGNQDKR	67	574.682	1721.02	1720.93	56.4632
								VYDYYETDEFAIAEYNAPCSK	65	850.087	2547.24	2547.08	63.0487	Carbamidomethyl (C)
								SSGSLLNNAIK	62	552.332	1102.65	1102.6	45.7991
								SASNMAIVDVK	60	567.829	1133.64	1133.58	60.9717
								FQVDNNNR	53	503.765	1005.52	1005.46	52.2138
								LLLQQVSLPELPGEYSMK	51	687.743	2060.21	2060.09	58.3291	Oxidation (M)
								SSGSLLNNAIK	49	552.341	1102.67	1102.6	62.4053
								AIGYLNTGYQR	48	628.358	1254.7	1254.64	51.9458
								SSGSLLNNAIK	41	552.346	1102.68	1102.6	71.6889
								SLNEEAVKK	40	509.31	1016.61	1016.55	54.3456
								MVSGFIPLKPTVK	40	478.307	1431.9	1431.82	57.8566	Oxidation (M)
								LLLQQVSLPELPGEYSMK	39	682.404	2044.19	2044.09	49.034
								NQGNTWLTAFVLK	39	746.447	1490.88	1490.79	60.7115
								MVSGFIPLKPTVK	37	472.97	1415.89	1415.82	46.669
								SSGSLLNNAIK	33	552.335	1102.66	1102.6	52.0389
								TEVSSNHVLIYLDK	32	539.991	1616.95	1616.84	68.5621
91	2218	1: gi|425146 kallistatin 2: gi|21361302 serine (or cysteine) proteinase inhibitor, clade A (alpha-1 antiproteinase, antitrypsin), member 4 3: gi|28375497 unnamed protein product [Homo sapiens]	48525.2	147	100	8	6	FSISGSYVLDQILPR	59	565.677	1694.01	1693.9	62.5832	"(gi|21361302) (gi|28375497)
								FYYLIASETPGK	58	694.896	1387.78	1387.7	53.7795
								DVLMVLVNYIYFK	55	817.003	1631.99	1631.86	79.1371	Oxidation (M)
								IAPANADFAFR	46	596.841	1191.67	1191.6	53.9533
								LGFTDLFSK	46	514.31	1026.61	1026.54	65.6449
								GFQHLLHTLNLPGHGLETR	39	535.818	2139.24	2139.13	51.62
91	2218	1: gi|4557327 apolipoprotein H precursor [Homo sapiens] 2: gi|6573461 Chain A, Crystal Structure Of Human Beta-2-Glycoprotein-I (Apolipoprotein-H) 3: gi|543826 Beta-2-glycoprotein 1 precursor (Beta-2-glycoprotein I) (Apolipoprotein H) (Apo-H) (B2GPI) (Beta(2)	38286.7	117	100	5	5	FICPLTGLWPINTLK	50	887.033	1772.05	1771.97	45.8761	Carbamidomethyl (C)"(gi|6573461) (gi|543826)
								VCPFAGILENGAVR	47	751.929	1501.84	1501.77	47.9134	Carbamidomethyl (C)
								ATVVYQGER	47	511.798	1021.58	1021.52	60.8966
								KCSYTEDAQCIDGTIEVPK	42	738.715	2213.12	2213	57.188	2 Carbamidomethyl (C)
								TCPKPDDLPFSTVVPLK	36	638.71	1913.11	1913	58.3195	Carbamidomethyl (C)
92	2226	1: gi|6573461 Chain A, Crystal Structure Of Human Beta-2-Glycoprotein-I (Apolipoprotein-H)	36244.6	199	100	11	9	VCPFAGILENGAVR	66	751.93	1501.84	1501.77	48.9455	Carbamidomethyl (C)"
								ATVVYQGER	60	511.789	1021.56	1021.52	42.8509
								TCPKPDDLPFSTVVPLK	55	638.705	1913.09	1913	50.3765	Carbamidomethyl (C)
								KCSYTEDAQCIDGTIEVPK	40	738.716	2213.13	2213	57.5554	2 Carbamidomethyl (C)
								VSFFCK	38	394.221	786.427	786.373	67.8444	Carbamidomethyl (C)
								CSYTEDAQCIDGTIEVPK	36	695.9	2084.68	2084.9	-107.858	2 Carbamidomethyl (C)
								EHSSLAFWK	36	552.808	1103.6	1103.54	55.7868
								EHSSLAFWK	33	552.797	1103.58	1103.54	35.9217
								CTEEGKWSPELPVCAPIICPPPSIPTFATLR	33	881.733	3522.9	3522.73	48.0533	3 Carbamidomethyl (C)
92	2226	1: gi|112911 Alpha-2-macroglobulin precursor (Alpha-2-M) 2: gi|224053 macroglobulin alpha2 3: gi|46812315 alpha 2 macroglobulin [Homo sapiens] 4: gi|51476396 hypothetical protein [Homo sapiens] 5: gi|66932947 alpha-2-macroglobulin precursor [Homo sapiens] 6: gi|62088808 Alpha 2 macroglobulin variant [Homo sapiens]	163175	193	100	7	7	NQGNTWLTAFVLK	77	746.442	1490.87	1490.79	54.7804	"(gi|224053) (gi|46812315) (gi|51476396) (gi|66932947) (gi|62088808)
								ALLAYAFALAGNQDK	70	783.458	1564.9	1564.82	48.4214
								AIGYLNTGYQR	60	628.356	1254.7	1254.64	49.4717
								TEVSSNHVLIYLDK	57	539.985	1616.93	1616.84	56.5071
								SSGSLLNNAIK	48	552.343	1102.67	1102.6	67.1868
								SSGSLLNNAIK	41	552.328	1102.64	1102.6	38.4456
93	2252	1: gi|112911 Alpha-2-macroglobulin precursor (Alpha-2-M) 2: gi|46812315 alpha 2 macroglobulin [Homo sapiens] 3: gi|51476396 hypothetical protein [Homo sapiens] 4: gi|66932947 alpha-2-macroglobulin precursor [Homo sapiens] 5: gi|62088808 Alpha 2 macroglobulin variant [Homo sapiens]	163175	188	100	10	10	NQGNTWLTAFVLK	65	746.436	1490.86	1490.79	46.2708	"(gi|46812315) (gi|51476396) (gi|66932947) (gi|62088808)
								ALLAYAFALAGNQDK	60	783.452	1564.89	1564.82	40.8333
								AIGYLNTGYQR	57	628.353	1254.69	1254.64	44.9126
								ALLAYAFALAGNQDKR	49	574.687	1721.04	1720.93	66.0301
								TEVSSNHVLIYLDK	47	539.984	1616.93	1616.84	55.3177
								SSGSLLNNAIK	41	552.329	1102.64	1102.6	40.1561
								LLLQQVSLPELPGEYSMK	41	682.418	2044.23	2044.09	68.6608
								QQNAQGGFSSTQDTVVALHALSK	38	796.444	2386.31	2386.19	50.8678
								SSGSLLNNAIK	36	552.338	1102.66	1102.6	57.7182
								FQVDNNNR	33	503.755	1005.5	1005.46	33.128
93	2252	1: gi|4557327 apolipoprotein H precursor [Homo sapiens] 2: gi|6573461 Chain A, Crystal Structure Of Human Beta-2-Glycoprotein-I (Apolipoprotein-H) 3: gi|543826 Beta-2-glycoprotein 1 precursor (Beta-2-glycoprotein I) (Apolipoprotein H) (Apo-H) (B2GPI) (Beta(2)	38286.7	173	100	8	8	TDASDVKPC	62	496.746	991.478	991.428	50.3607	Carbamidomethyl (C)"(gi|6573461) (gi|543826)
								KCSYTEDAQCIDGTIEVPK	59	738.714	2213.12	2213	55.7402	2 Carbamidomethyl (C)
								FICPLTGLWPINTLK	54	887.034	1772.05	1771.97	47.8434	Carbamidomethyl (C)
								VCPFAGILENGAVR	51	751.931	1501.85	1501.77	51.0258	Carbamidomethyl (C)
								ATVVYQGER	43	511.793	1021.57	1021.52	50.422
								VSFFCK	42	394.218	786.422	786.373	61.2724	Carbamidomethyl (C)
								KATVVYQGER	39	575.844	1149.67	1149.61	51.2137
								TCPKPDDLPFSTVVPLK	33	638.705	1913.09	1913	50.654	Carbamidomethyl (C)
94	3255	no data
95	3630	gi|178775 proapolipoprotein gi|229479 lipoprotein Gln I gi|4557321 lipoprotein Gln I gi|4557321 apolipoprotein A-I preproprotein [Homo sapiens]	28944	159			6	QKVEPLR	30.81	426.778	851.486	851.542	-65.1759	Pyro-glu (N-term Q)
								LSPLGEEMR	39.68	516.314	1030.51	1030.61	-99.0672
								QGLLPVLESFK	8.76	615.893	1229.7	1229.77	-57.1651
								DLATVYVDVLK	19.6	618.398	1234.68	1234.78	-81.3099
								VQPYLDDFQK	36.43	626.875	1251.61	1251.74	-97.3049
								VSFLSALEEYTK	24.76	693.911	1385.71	1385.81	-71.7993
95	3630	gi|32171249 prostaglandin H2 D-isomerase [Homo sapiens] gi|55962673 prostaglandin D2 synthase 21kDa (brain) [Homo sapiens]	21015	132			4	MATLYSR	14.81	421.261	840.416	840.507	-107.792
								MATLYSR	14.38	421.265	840.416	840.515	-117.785
								TMLLQPAGSLGSYSYR	43.7	880.517	1758.86	1759.02	-90.3912	Oxidation (M)
								AQGFTEDTIVFLPQTDK	73.19	955.572	1908.95	1909.13	-95.3314
95	3630	gi|39654998 Chain A, Hr1b Domain From Prk1	9054	60			2	MIPATNLSR	40.57	522.83	1043.54	1043.65	-97.5427	Acetyl (N-term)
								CIPATNLSR	18.95	537.334	1072.53	1072.65	-111.313	Acetyl (N-term); Carbamidomethyl (C)
96	2229	1: gi|177933 alpha-1-antichymotrypsin precursor 2: gi|1340142 alpha1-antichymotrypsin [Homo sapiens] 3: gi|4165890 alpha-1-antichymotrypsin precursor [Homo sapiens] 4: gi|6980544 Chain A, Alpha1-Antichymotrypsin Serpin In The Delta Conformation (Partial Loop Insertion) 5: gi|50659080 serpin peptidase inhibitor, clade A, member 3 precursor [Homo sapiens]	45453.4	319	100	16	15	AVLDVFEEGTEASAATAVK	86	636.691	1907.05	1906.95	51.3049	"(gi|1340142) (gi|4165890) (gi|6980544) (gi|50659080)
								ITLLSALVETR	84	608.398	1214.78	1214.72	47.4034
								EIGELYLPK	68	531.344	1060.67	1060.58	88.1913
								DEELSCTVVELK	55	711.392	1420.77	1420.68	65.7941	Carbamidomethyl (C)
								EQLSLLDR	45	487.297	972.579	972.524	56.4665
								AKWEMPFDPQDTHQSR	44	658.347	1972.02	1971.89	65.2323
								MEEVEAMLLPETLK	44	824.945	1647.87	1647.81	39.2624	Oxidation (M)
								MEEVEAMLLPETLK	42	816.945	1631.88	1631.81	37.4675
								GTHVDLGLASANVDFAFSLYK	42	742.422	2224.24	2224.12	57.1751
								EQLSLLDR	41	487.298	972.581	972.524	58.5826
								FNRPFLMIIVPTDTQNIFFMSK	39	887.187	2658.54	2658.37	63.3821
								FNRPFLMIIVPTDTQNIFFMSK	39	897.838	2690.49	2690.36	48.7857	2 Oxidation (M)
								EQLSLLDRFTEDAKR	35	607.685	1820.03	1819.94	49.6972
								EQLSLLDR	32	487.297	972.58	972.524	57.8217
96	2229	1: gi|9665262 EGF-containing fibulin-like extracellular matrix protein 1 precursor [Homo sapiens]	54604.2	199	100	6	5	SVPSDIFQIQATTIYANTINTFR	80	867.501	2599.48	2599.33	58.4716	"
								EHIVDLEMLTVSSIGTFR	66	683.061	2046.16	2046.05	56.5012
								EHIVDLEMLTVSSIGTFR	59	688.389	2062.15	2062.04	51.111	Oxidation (M)
								SGNENGEFYLR	56	643.332	1284.65	1284.57	58.6483
								CVNHYGGYLCLPK	40	527.614	1579.82	1579.73	58.5512	2 Carbamidomethyl (C)
96	2229	1: gi|532198 angiotensinogen 2: gi|553181 angiotensinogen 3: gi|4557287 angiotensinogen preproprotein [Homo sapiens] 4: gi|15079348 Angiotensinogen (serpin peptidase inhibitor, clade A, member 8) [Homo sapiens] 5: gi|37790798 angiotensinogen (serine (or cysteine) proteinase inhibitor, clade A (alpha-1 antiproteinase, antitr 6: gi|62089124 angiotensinogen precursor variant [Homo sapiens] 7: gi|628…	53121.5	79	100	2	2	ADSQAQLLLSTVVGVFTAPGLHLK	53	822.513	2464.52	2464.37	60.5173	"(gi|553181) (gi|4557287) (gi|15079348) (gi|37790798) (gi|62089124) (gi|62897155)
								ALQDQLVLVAAK	51	634.916	1267.82	1267.75	54.0193
96	2229	1: gi|177809 alpha-1-antichymotrypsin 2: gi|177933 alpha-1-antichymotrypsin precursor 3: gi|1340142 alpha1-antichymotrypsin [Homo sapiens] 4: gi|4165890 alpha-1-antichymotrypsin precursor [Homo sapiens] 5: gi|6980544 Chain A, Alpha1-Antichymotrypsin Serpin In The Delta Conformation (Partial Loop Insertion) 6: gi|50659080 serpin peptidase inhibitor, clade A, member 3 precursor [Homo sapiens]	48606	249	100	9	9	ADLSGITGAR	88	480.76	959.505	959.504	1.95622	"(gi|177933) (gi|1340142) (gi|4165890) (gi|6980544) (gi|50659080)
								NLAVSQVVHK	73	547.82	1093.63	1093.62	1.00949
								ITLLSALVETR	68	608.37	1214.73	1214.72	1.68269
								EQLSLLDR	50	487.27	972.525	972.524	1.50228
								GKITDLIK	49	444.28	886.545	886.549	-3.70989
								DEELSCTVVELK	41	711.35	1420.69	1420.68	6.98682	Carbamidomethyl (C)
								DSLEFR	39	383.69	765.365	765.366	-0.318802
								NLAVSQVVHK	36	365.55	1093.63	1093.62	3.50029
								FTEDAKR	32	433.72	865.425	865.429	-4.51106
96	2229	1: gi|7512417 extracellular protein - human 2: gi|9665262 EGF-containing fibulin-like extracellular matrix protein 1 precursor [Homo sapiens] 3: gi|62088004 EGF-containing fibulin-like extracellular matrix protein 1 isoform b variant [Homo sapiens]	43108.8	79	100	2	2	SGNENGEFYLR	53	643.3	1284.59	1284.57	9.3712	"(gi|9665262) (gi|62088004)
								QTSPVSAMLVLVK	50	694.9	1387.79	1387.77	7.92852	Oxidation (M)
96	2229	1: gi|2521983 alpha2-HS glycoprotein [Homo sapiens] 2: gi|4502005 alpha-2-HS-glycoprotein [Homo sapiens]	39398.8	60	99	2	2	HTLNQIDEVK	55	598.82	1195.63	1195.62	4.82846	"(gi|4502005)
								FSVVYAK	31	407.23	812.445	812.443	2.77681
97	2235	1: gi|177933 alpha-1-antichymotrypsin precursor 2: gi|1340142 alpha1-antichymotrypsin [Homo sapiens] 3: gi|4165890 alpha-1-antichymotrypsin precursor [Homo sapiens] 4: gi|6980544 Chain A, Alpha1-Antichymotrypsin Serpin In The Delta Conformation (Partial Loop Insertion) 5: gi|50659080 serpin peptidase inhibitor, clade A, member 3 precursor [Homo sapiens]	45453.4	497	100	17	22	EIGELYLPK	87	531.349	1060.68	1060.58	97.2562	"(gi|1340142) (gi|4165890) (gi|6980544) (gi|50659080)
								MEEVEAMLLPETLK	77	816.948	1631.88	1631.81	40.8796
								DEELSCTVVELK	73	711.386	1420.76	1420.68	58.0456	Carbamidomethyl (C)
								AVLDVFEEGTEASAATAVK	68	636.691	1907.05	1906.95	52.1466
								LYGSEAFATDFQDSAAAK	67	946.476	1890.94	1890.86	39.5967
								AKWEMPFDPQDTHQSR	63	658.341	1972	1971.89	56.6685
								LYGSEAFATDFQDSAAAKK	62	674.033	2019.08	2018.96	58.8937
								ITLLSALVETR	60	608.397	1214.78	1214.72	45.8623
								NLAVSQVVHK	56	547.831	1093.65	1093.62	21.7607
								RLYGSEAFATDFQDSAAAKK	50	726.064	2175.17	2175.06	51.2335
								EQLSLLDR	46	487.296	972.578	972.524	55.831
								MEEVEAMLLPETLKR	46	597.007	1788	1787.92	45.6487
								FNRPFLMIIVPTDTQNIFFMSK	45	887.183	2658.53	2658.37	58.9312
								FNRPFLMIIVPTDTQNIFFMSK	37	892.498	2674.47	2674.37	40.5401	Oxidation (M)
								GTHVDLGLASANVDFAFSLYK	33	742.433	2224.28	2224.12	72.5115
								EQLSLLDR	33	487.296	972.577	972.524	54.9837
								EQLSLLDR	33	487.294	972.574	972.524	51.1216
								WVMVPMMSLHHLTIPYFR	33	565.326	2257.27	2257.14	60.773
								EQLSLLDRFTEDAKR	32	607.689	1820.05	1819.94	56.1672
								EQLSLLDR	32	487.292	972.57	972.524	47.2616
								FNRPFLMIIVPTDTQNIFFMSK	31	897.839	2690.5	2690.36	50.6122	2 Oxidation (M)
97	2235	1: gi|177933 alpha-1-antichymotrypsin precursor 2: gi|1340142 alpha1-antichymotrypsin [Homo sapiens] 3: gi|4165890 alpha-1-antichymotrypsin precursor [Homo sapiens] 4: gi|6980544 Chain A, Alpha1-Antichymotrypsin Serpin In The Delta Conformation (Partial Loop Insertion) 5: gi|50659080 serpin peptidase inhibitor, clade A, member 3 precursor [Homo sapiens]	45453.4	337	100	15	13	ADLSGITGAR	78	480.76	959.505	959.504	1.95622	"(gi|1340142) (gi|4165890) (gi|6980544) (gi|50659080)
								AKWEMPFDPQDTHQSR	70	663.64	1987.9	1987.88	6.80522	Oxidation (M)
								NLAVSQVVHK	70	547.82	1093.63	1093.62	1.00949
								ITLLSALVETR	64	608.373	1214.73	1214.72	6.85259
								AVLDVFEEGTEASAATAVK	63	636.66	1906.96	1906.95	3.07873
								GKITDLIK	51	444.28	886.545	886.549	-3.70989
								EQLSLLDR	51	487.27	972.525	972.524	1.50228
								DEELSCTVVELK	49	711.35	1420.69	1420.68	6.98682	Carbamidomethyl (C)
								WEMPFDPQDTHQSR	43	597.26	1788.76	1788.75	3.12676	Oxidation (M)
								ITDLIK	42	351.72	701.425	701.432	-9.80708
								DSLEFR	36	383.69	765.365	765.366	-0.318802
								NLAVSQVVHK	31	365.55	1093.63	1093.62	3.50029
97	2235	1: gi|2521983 alpha2-HS glycoprotein [Homo sapiens] 2: gi|4502005 alpha-2-HS-glycoprotein [Homo sapiens]	39398.8	115	100	4	4	HTFMGVVSLGSPSGEVSHPR	74	699.68	2096.02	2096.01	3.49378	Oxidation (M)"(gi|4502005)
								HTLNQIDEVK	57	598.82	1195.63	1195.62	4.82846
								CNLLAEK	36	424.22	846.425	846.427	-1.72726	Carbamidomethyl (C)
								FSVVYAK	32	407.23	812.445	812.443	2.77681
97	2235	1: gi|7512417 extracellular protein - human 2: gi|9665262 EGF-containing fibulin-like extracellular matrix protein 1 precursor [Homo sapiens] 3: gi|62088004 EGF-containing fibulin-like extracellular matrix protein 1 isoform b variant [Homo sapiens] 4: gi|62822120 unknown [Homo sapiens]	43108.8	133	100	6	4	EHIVDLEMLTVSSIGTFR	61	683.07	2046.19	2046.05	69.4642	"(gi|9665262) (gi|62088004) (gi|62822120)
								QTSPVSAMLVLVK	50	694.934	1387.85	1387.77	56.5272	Oxidation (M)
								SGNENGEFYLR	46	643.325	1284.64	1284.57	48.441
								EHIVDLEMLTVSSIGTFR	45	688.395	2062.16	2062.04	59.8097	Oxidation (M)
97	2235	1: gi|115851 Corticosteroid-binding globulin precursor (CBG) (Transcortin) (Serpin A6) 2: gi|73858564 corticosteroid binding globulin precursor [Homo sapiens]	45111.9	111	100	3	3	MNTVIAALSR	73	546.3	1090.59	1090.58	4.58838	Oxidation (M)"(gi|73858564)
								WSAGLTSSQVDLYIPK	45	882.97	1763.93	1763.91	9.11895
								HLVALSPK	43	432.77	863.525	863.523	2.99934
97	2235	1: gi|187025 lecithin:cholesterol acyltransferase precursor 2: gi|386858 lecithin-cholesterol acyltransferase precursor (EC 2.3.1.43) 3: gi|998999 lecithin:cholesterol acyltransferase, LCAT [human, plasma, Peptide, 416 aa] 4: gi|4557892 lecithin-cholesterol acyltransferase precursor [Homo sapiens]	47850.2	84	100	2	2	LAGYLHTLVQNLVNNGYVRDETVR	55	686.912	2743.62	2743.44	64.5248	"(gi|386858) (gi|998999) (gi|4557892)
								TYSVEYLDSSK	52	646.347	1290.68	1290.6	63.641
97	2235	1: gi|115851 Corticosteroid-binding globulin precursor (CBG) (Transcortin) (Serpin A6) 2: gi|73858564 corticosteroid binding globulin precursor [Homo sapiens]	45111.9	65	98	3	3	MNTVIAALSR	47	546.325	1090.63	1090.58	49.9716	Oxidation (M)"(gi|73858564)
								MNTVIAALSR	47	538.32	1074.62	1074.59	36.6002
97	2235	1: gi|7512417 extracellular protein - human 2: gi|9665262 EGF-containing fibulin-like extracellular matrix protein 1 precursor [Homo sapiens] 3: gi|62088004 EGF-containing fibulin-like extracellular matrix protein 1 isoform b variant [Homo sapiens] 4: gi|62822120 unknown [Homo sapiens]	43108.8	84			1	QTSPVSAMLVLVK	84	694.9	1387.79	1387.77	7.92852	Oxidation (M)"(gi|9665262) (gi|62088004) (gi|62822120)
98	2261	1: gi|177933 alpha-1-antichymotrypsin precursor 2: gi|1340142 alpha1-antichymotrypsin [Homo sapiens] 3: gi|4165890 alpha-1-antichymotrypsin precursor [Homo sapiens] 4: gi|6980544 Chain A, Alpha1-Antichymotrypsin Serpin In The Delta Conformation (Partial Loop Insertion) 5: gi|21961493 Serpin peptidase inhibitor, clade A (alpha-1 antiproteinase, antitrypsin), member 3 [Homo sapiens] 6: gi|50659080 …	45453.4	255	100	12	12	ITLLSALVETR	72	608.401	1214.79	1214.72	52.5815	"(gi|1340142) (gi|4165890) (gi|6980544) (gi|21961493) (gi|50659080)
								AVLDVFEEGTEASAATAVK	67	636.692	1907.05	1906.95	53.5561
								AKWEMPFDPQDTHQSR	62	658.349	1972.02	1971.89	68.514
								LYGSEAFATDFQDSAAAK	59	946.482	1890.95	1890.86	45.8415
								EIGELYLPK	55	531.331	1060.65	1060.58	63.5086
								EQLSLLDR	49	487.296	972.578	972.524	55.5801
								LYGSEAFATDFQDSAAAKK	47	674.031	2019.07	2018.96	55.7183
								FNRPFLMIIVPTDTQNIFFMSK	40	897.834	2690.48	2690.36	44.5126	2 Oxidation (M)
								FNRPFLMIIVPTDTQNIFFMSK	38	887.172	2658.5	2658.37	47.1767
								EQLSLLDR	36	487.295	972.576	972.524	53.4948
								EQLSLLDR	36	487.303	972.592	972.524	69.8338
								EQLSLLDR	32	487.294	972.573	972.524	50.5849
98	2261	1: gi|177809 alpha-1-antichymotrypsin 2: gi|177933 alpha-1-antichymotrypsin precursor 3: gi|1340142 alpha1-antichymotrypsin [Homo sapiens] 4: gi|4165890 alpha-1-antichymotrypsin precursor [Homo sapiens] 5: gi|6980544 Chain A, Alpha1-Antichymotrypsin Serpin In The Delta Conformation (Partial Loop Insertion) 6: gi|50659080 serpin peptidase inhibitor, clade A, member 3 precursor [Homo sapiens]	48606	236	100	9	9	ADLSGITGAR	73	480.76	959.505	959.504	1.95622	"(gi|177933) (gi|1340142) (gi|4165890) (gi|6980544) (gi|50659080)
								NLAVSQVVHK	73	547.82	1093.63	1093.62	1.00949
								ITLLSALVETR	68	608.375	1214.73	1214.72	9.47047
								DEELSCTVVELK	51	711.35	1420.69	1420.68	6.98682	Carbamidomethyl (C)
								EQLSLLDR	51	487.27	972.525	972.524	1.50228
								GKITDLIK	45	444.283	886.552	886.549	3.41888
								WEMPFDPQDTHQSR	35	597.26	1788.76	1788.75	3.12676	Oxidation (M)
								DSLEFR	35	383.69	765.365	765.366	-0.318802
								ITDLIK	35	351.72	701.425	701.432	-9.80708
98	2261	1: gi|9665262 EGF-containing fibulin-like extracellular matrix protein 1 precursor [Homo sapiens]	54604.2	140	100	6	6	EHIVDLEMLTVSSIGTFR	68	688.391	2062.15	2062.04	53.8069	Oxidation (M)"
								EHIVDLEMLTVSSIGTFR	51	683.062	2046.16	2046.05	57.271
								SVPSDIFQIQATTIYANTINTFR	50	867.496	2599.46	2599.33	52.6201
								ADQVCINLR	42	544.805	1087.6	1087.54	47.7636	Carbamidomethyl (C)
								CVNHYGGYLCLPK	32	527.612	1579.81	1579.73	54.5442	2 Carbamidomethyl (C)
98	2261	1: gi|532198 angiotensinogen 2: gi|553181 angiotensinogen 3: gi|4557287 angiotensinogen preproprotein [Homo sapiens] 4: gi|15079348 Angiotensinogen (serpin peptidase inhibitor, clade A, member 8) [Homo sapiens] 5: gi|37790798 angiotensinogen (serine (or cysteine) proteinase inhibitor, clade A (alpha-1 antiproteinase, antitr 6: gi|62089124 angiotensinogen precursor variant [Homo sapiens] 7: gi|628…	53121.5	95	100	3	3	ALQDQLVLVAAK	55	634.915	1267.82	1267.75	51.8407	"(gi|553181) (gi|4557287) (gi|15079348) (gi|37790798) (gi|62089124) (gi|62897155)
								ADSQAQLLLSTVVGVFTAPGLHLK	52	822.507	2464.5	2464.37	52.9685
								QPFVQGLALYTPVVLPR	44	633.398	1897.17	1897.08	46.6527
98	2261	1: gi|5531817 secretogranin III [Homo sapiens] 2: gi|15778922 Secretogranin III [Homo sapiens] 3: gi|19557645 secretogranin III [Homo sapiens]	53047.9	58	100	3	3	TLIDFVK	37	418.271	834.528	834.485	51.0914	"(gi|15778922) (gi|19557645)
								FQDDPDGLHQLDGTPLTAEDIVHK	33	666.113	2660.42	2660.27	56.7574
								LLNLGLITESQAHTLEDEVAEVLQK	32	921.872	2762.59	2762.47	44.4685
98	2261	1: gi|2521983 alpha2-HS glycoprotein [Homo sapiens] 2: gi|4502005 alpha-2-HS-glycoprotein [Homo sapiens]	39398.8	67	100	3	3	HTLNQIDEVK	57	598.82	1195.63	1195.62	4.82846	"(gi|4502005)
								CNLLAEK	36	424.22	846.425	846.427	-1.72726	Carbamidomethyl (C)
								FSVVYAK	32	407.23	812.445	812.443	2.77681
98	2261	1: gi|4826876 osteomodulin [Homo sapiens]	49460.2	50	98	2	2	LQDIPYNIFNLPNIVELSVGHNK	50	879.855	2636.54	2636.4	56.0955	"
								LLLGYNEISK	31	575.364	1148.71	1148.64	60.2859
98	2261	1: gi|5802984 UDP-GlcNAc:betaGal beta-1,3-N-acetylglucosaminyltransferase 1 [Homo sapiens]	47088.9	60	100	2	2	TALASGGVLDASGDYR	46	776.89	1551.77	1551.75	8.12629	"
								VPTFDER	40	432.22	862.425	862.418	8.10627
99	2262	1: gi|177933 alpha-1-antichymotrypsin precursor 2: gi|1340142 alpha1-antichymotrypsin [Homo sapiens] 3: gi|4165890 alpha-1-antichymotrypsin precursor [Homo sapiens] 4: gi|6980544 Chain A, Alpha1-Antichymotrypsin Serpin In The Delta Conformation (Partial Loop Insertion) 5: gi|50659080 serpin peptidase inhibitor, clade A, member 3 precursor [Homo sapiens]	45453.4	284	100	14	15	DEELSCTVVELK	73	711.386	1420.76	1420.68	57.9302	Carbamidomethyl (C)"(gi|1340142) (gi|4165890) (gi|6980544) (gi|50659080)
								ITLLSALVETR	70	608.401	1214.79	1214.72	53.4887
								MEEVEAMLLPETLK	56	816.956	1631.9	1631.81	50.9212
								EQLSLLDR	54	487.289	972.563	972.524	39.8067
								EQLSLLDR	54	487.299	972.584	972.524	62.0869
								AVLDVFEEGTEASAATAVK	52	636.691	1907.05	1906.95	51.1995
								EIGELYLPK	48	531.352	1060.69	1060.58	103.198
								EQLSLLDR	42	487.296	972.577	972.524	54.5622
								LYGSEAFATDFQDSAAAK	42	946.486	1890.96	1890.86	50.0258
								AKWEMPFDPQDTHQSR	41	658.342	1972	1971.89	57.3668
								EQLSLLDRFTEDAK	37	555.65	1663.93	1663.84	51.5337
								FNRPFLMIIVPTDTQNIFFMSK	35	887	2657.98	2658.37	-147.45
								GTHVDLGLASANVDFAFSLYK	35	742.411	2224.21	2224.12	43.2495
								FNRPFLMIIVPTDTQNIFFMSK	35	897.834	2690.48	2690.36	44.7524	2 Oxidation (M)
								EQLSLLDR	33	487.297	972.579	972.524	56.193
99	2262	1: gi|9665262 EGF-containing fibulin-like extracellular matrix protein 1 precursor [Homo sapiens]	54604.2	242	100	8	8	EHIVDLEMLTVSSIGTFR	79	683.054	2046.14	2046.05	46.9559	"
								SGNENGEFYLR	76	643.336	1284.66	1284.57	65.4692
								SGNENGEFYLR	76	643.326	1284.64	1284.57	49.6056
								SVPSDIFQIQATTIYANTINTFR	64	867.497	2599.47	2599.33	54.289
								EHIVDLEMLTVSSIGTFR	54	688.395	2062.16	2062.04	59.7675	Oxidation (M)
								CVNHYGGYLCLPK	40	527.613	1579.82	1579.73	57.0453	2 Carbamidomethyl (C)
								QTSPVSAMLVLVK	39	694.931	1387.85	1387.77	52.2556	Oxidation (M)
								ELPQSIVYK	31	538.825	1075.63	1075.59	40.296
99	2262	1: gi|177809 alpha-1-antichymotrypsin 2: gi|177933 alpha-1-antichymotrypsin precursor 3: gi|443345 Chain A, Alpha1 Antichymotrypsin 4: gi|1340142 alpha1-antichymotrypsin [Homo sapiens] 5: gi|2982038 Chain A, Cleaved Antichymotrypsin A349r 6: gi|2982150 Chain A, Cleaved Antichymotrypsin A347r 7: gi|2982165 Chain A, Cleaved Antichymotrypsin T345r 8: gi|4165890 alpha-1-antichymotrypsin precursor [Ho…	48606	180	100	6	6	ADLSGITGAR	84	480.76	959.505	959.504	1.95622	"(gi|177933) (gi|443345) (gi|1340142) (gi|2982038) (gi|2982150) (gi|2982165) (gi|4165890) (gi|6980544) (gi|50659080)
								NLAVSQVVHK	70	547.82	1093.63	1093.62	1.00949
								WEMPFDPQDTHQSR	50	597.26	1788.76	1788.75	3.12676	Oxidation (M)
								EQLSLLDR	45	487.27	972.525	972.524	1.50228
								DEELSCTVVELK	38	711.35	1420.69	1420.68	6.98682	Carbamidomethyl (C)
								DSLEFR	35	383.69	765.365	765.366	-0.318802
99	2262	1: gi|7512417 extracellular protein - human 2: gi|9665262 EGF-containing fibulin-like extracellular matrix protein 1 precursor [Homo sapiens] 3: gi|62088004 EGF-containing fibulin-like extracellular matrix protein 1 isoform b variant [Homo sapiens]	43108.8	158	100	5	5	ADQVCINLR	70	544.78	1087.55	1087.54	0.96088	Carbamidomethyl (C)"(gi|9665262) (gi|62088004)
								LNCEDIDECR	69	662.27	1322.53	1322.52	1.78522	2 Carbamidomethyl (C)
								SGNENGEFYLR	60	643.3	1284.59	1284.57	9.3712
								QTSPVSAMLVLVK	40	694.9	1387.79	1387.77	7.92852	Oxidation (M)
								RNPADPQR	31	477.25	952.485	952.484	1.67142
99	2262	1: gi|5802984 UDP-GlcNAc:betaGal beta-1,3-N-acetylglucosaminyltransferase 1 [Homo sapiens]	47088.9	168	100	4	4	TALASGGVLDASGDYR	77	776.907	1551.8	1551.75	30.4262	"
								TTMDPNDVILATHASVDNLLHLSGLLER	65	762.197	3044.76	3044.56	65.729
								TTMDPNDVILATHASVDNLLHLSGLLER	63	766.19	3060.73	3060.55	58.0316	Oxidation (M)
								EPGEFALLR	46	516.305	1030.6	1030.54	49.1963
99	2262	1: gi|532198 angiotensinogen 2: gi|553181 angiotensinogen 3: gi|4557287 angiotensinogen preproprotein [Homo sapiens] 4: gi|15079348 Angiotensinogen (serpin peptidase inhibitor, clade A, member 8) [Homo sapiens] 5: gi|37790798 angiotensinogen (serine (or cysteine) proteinase inhibitor, clade A (alpha-1 antiproteinase, antitr 6: gi|62089124 angiotensinogen precursor variant [Homo sapiens] 7: gi|628…	53121.5	133	100	3	3	SLDFTELDVAAEK	70	719.394	1436.77	1436.7	48.9906	"(gi|553181) (gi|4557287) (gi|15079348) (gi|37790798) (gi|62089124) (gi|62897155)
								ALQDQLVLVAAK	62	634.908	1267.8	1267.75	41.326
								ADSQAQLLLSTVVGVFTAPGLHLK	58	822.512	2464.51	2464.37	59.065
99	2262	1: gi|4504893 kininogen 1 [Homo sapiens] 2: gi|37748641 Kininogen 1 [Homo sapiens] 3: gi|62898910 kininogen 1 variant [Homo sapiens] 4: gi|124056474 Kininogen-1 precursor (Alpha-2-thiol proteinase inhibitor) [Contains: Kininogen-1 heavy chain; Brad	47852.7	59	100	3	3	DIPTNSPELEETLTHTITK	53	713.739	2138.2	2138.07	56.6926	"(gi|37748641) (gi|62898910) (gi|124056474)
								QVVAGLNFR	37	502.316	1002.62	1002.56	55.3313
								TVGSDTFYSFK	33	626.322	1250.63	1250.58	38.8211
99	2262	1: gi|4826876 osteomodulin [Homo sapiens]	49460.2	56	100	2	2	LQDIPYNIFNLPNIVELSVGHNK	45	879.84	2636.5	2636.4	39.1804	"
								LLLGYNEISK	38	575.352	1148.69	1148.64	38.737
99	2262	1: gi|5802984 UDP-GlcNAc:betaGal beta-1,3-N-acetylglucosaminyltransferase 1 [Homo sapiens]	47088.9	90	100	2	2	TALASGGVLDASGDYR	77	776.89	1551.77	1551.75	8.12629	"
								VPTFDER	39	432.22	862.425	862.418	8.10627
99	2262	1: gi|4504893 kininogen 1 [Homo sapiens] 2: gi|37748641 Kininogen 1 [Homo sapiens] 3: gi|62898910 kininogen 1 variant [Homo sapiens] 4: gi|124056474 Kininogen-1 precursor (Alpha-2-thiol proteinase inhibitor) [Contains: Kininogen-1 heavy chain; Brad	47852.7	67	100	2	2	TVGSDTFYSFK	53	626.3	1250.59	1250.58	2.85387	"(gi|37748641) (gi|62898910) (gi|124056474)
								QVVAGLNFR	44	502.29	1002.57	1002.56	4.43165
102	3508	1: gi|32171249 prostaglandin H2 D-isomerase [Homo sapiens] 2: gi|55962670 prostaglandin D2 synthase 21kDa (brain) [Homo sapiens] 3: gi|55962671 prostaglandin D2 synthase 21kDa (brain) [Homo sapiens] 4: gi|55962673 prostaglandin D2 synthase 21kDa (brain) [Homo sapiens]	21015.3	65	95	1	1	TMLLQPAGSLGSYSYR	65	587.34	1759	1758.86	77.6417	Oxidation (M)"(gi|55962670) (gi|55962671) (gi|55962673)
103	2825	1: gi|23512215 Chitinase 3-like 1 (cartilage glycoprotein-39) [Homo sapiens] 2: gi|29726259 Chain A, Crystal Structure Of Hcgp-39 In Complex With Chitin Tetramer 3: gi|84028186 Chitinase-3-like protein 1 precursor (Cartilage glycoprotein 39) (GP-39) (39 kDa synovial protein)	42499.3	206	100	10	7	QLLLSAALSAGK	73	586.393	1170.77	1170.7	63.3998	"(gi|29726259) (gi|84028186)
								SFTLASSETGVGAPISGPGIPGR	71	720.09	2157.25	2157.11	66.076
								ILGQQVPYATK	58	609.384	1216.75	1216.68	58.8354
								VTIDSSYDIAK	50	606.347	1210.68	1210.61	59.6204
								TLLSVGGWNFGSQR	47	507.967	1520.88	1520.77	69.147
								LVMGIPTFGR	40	553.846	1105.68	1105.6	74.9316	Oxidation (M)
								FPLTNAIK	39	452.305	902.595	902.523	80.8046
104	2863	1: gi|4557018 chitinase 3-like 1 [Homo sapiens] 2: gi|23512215 Chitinase 3-like 1 (cartilage glycoprotein-39) [Homo sapiens] 3: gi|29726259 Chain A, Crystal Structure Of Hcgp-39 In Complex With Chitin Tetramer 4: gi|84028186 Chitinase-3-like protein 1 precursor (Cartilage glycoprotein 39) (GP-39) (39 kDa synovial protein)	42586.4	150	100	5	5	SFTLASSETGVGAPISGPGIPGR	67	720.087	2157.24	2157.11	61.8287	"(gi|23512215) (gi|29726259) (gi|84028186)
								QLLLSAALSAGK	65	586.39	1170.76	1170.7	57.5059
								EAGTLAYYEICDFLR	58	607.665	1819.97	1819.85	69.5916	Carbamidomethyl (C)
								VTIDSSYDIAK	50	606.345	1210.68	1210.61	56.1528
105	2846	1: gi|29726259 Chain A, Crystal Structure Of Hcgp-39 In Complex With Chitin Tetramer 2: gi|84028186 Chitinase-3-like protein 1 precursor (Cartilage glycoprotein 39) (GP-39) (39 kDa synovial protein)	40463.3	346	100	15	13	EGDGSCFPDALDR	72	719.859	1437.7	1437.58	84.3103	Carbamidomethyl (C)"(gi|84028186)
								ILGQQVPYATK	71	609.378	1216.74	1216.68	49.349
								EGDGSCFPDALDR	64	719.844	1437.67	1437.58	62.2441	Carbamidomethyl (C)
								SFTLASSETGVGAPISGPGIPGR	63	720.094	2157.26	2157.11	70.6502
								QLLLSAALSAGK	61	586.393	1170.77	1170.7	62.8736
								ISQHLDFISIMTYDFHGAWR	51	614.097	2452.36	2452.16	79.2831	Oxidation (M)
								EGDGSCFPDALDR	50	719.862	1437.71	1437.58	88.3838	Carbamidomethyl (C)
								VTIDSSYDIAK	47	606.344	1210.67	1210.61	53.7226
								THGFDGLDLAWLYPGR	44	606.685	1817.03	1816.89	79.5359
								EAGTLAYYEICDFLR	44	607.678	1820.01	1819.85	91.4737	Carbamidomethyl (C)
								EGDGSCFPDALDR	44	719.856	1437.7	1437.58	79.7053	Carbamidomethyl (C)
								QHFTTLIK	37	485.81	969.605	969.528	78.7455	Pyro-glu (N-term Q)
								TLLSVGGWNFGSQR	34	761.443	1520.87	1520.77	63.8333
106	2843	1: gi|23512215 Chitinase 3-like 1 (cartilage glycoprotein-39) [Homo sapiens] 2: gi|29726259 Chain A, Crystal Structure Of Hcgp-39 In Complex With Chitin Tetramer 3: gi|84028186 Chitinase-3-like protein 1 precursor (Cartilage glycoprotein 39) (GP-39) (39 kDa synovial protein)	42499.3	65	100	5	2	ILGQQVPYATK	58	609.382	1216.75	1216.68	55.7336	"(gi|29726259) (gi|84028186)
								LVMGIPTFGR	36	553.854	1105.69	1105.6	88.3162	Oxidation (M)
107	3030	1: gi|178849 apolipoprotein E 2: gi|178853 apolipoprotein E 3: gi|364011 apolipoprotein E mutant E3K 4: gi|4557325 apolipoprotein E precursor [Homo sapiens]	36187.8	57	100	2	2	AATVGSLAGQPLQER	48	749.522	1497.03	1496.79	156.841	"(gi|178853) (gi|364011) (gi|4557325)
								AKLEEQAQQIR	45	657.432	1312.85	1312.71	106.433
107	3030	1: gi|364011 apolipoprotein E mutant E3K 2: gi|4557325 apolipoprotein E precursor [Homo sapiens]	36130.8	88	100	6	4	LGADMEDVCGR	63	611.796	1221.58	1221.51	53.2578	Carbamidomethyl (C)"(gi|4557325)
								LGPLVEQGR	54	484.828	967.641	967.545	99.5209
								SELEEQLTPVAEETR	47	865.993	1729.97	1729.84	77.3836
108	3152	1: gi|178849 apolipoprotein E 2: gi|178853 apolipoprotein E 3: gi|364011 apolipoprotein E mutant E3K 4: gi|4557325 apolipoprotein E precursor [Homo sapiens]	36187.8	229	100	8	8	WVQTLSEQVQEELLSSQVTQELR	84	910.865	2729.57	2729.39	67.9918	"(gi|178853) (gi|364011) (gi|4557325)
								SWFEPLVEDMQR	67	768.91	1535.81	1535.71	63.8032
								SELEEQLTPVAEETR	64	865.985	1729.95	1729.84	68.0798
								SELEEQLTPVAEETR	60	865.978	1729.94	1729.84	60.6814
								QWAGLVEK	57	465.782	929.549	929.497	55.4547
								GEVQAMLGQSTEELR	53	555.306	1662.9	1662.79	65.1147	Oxidation (M)
								AYKSELEEQLTPVAEETR	50	698.404	2092.19	2092.03	75.2794
								GEVQAMLGQSTEELR	49	549.98	1646.92	1646.79	75.0993
108	3152	1: gi|178855 apolipoprotein J precursor 2: gi|180620 complement cytolysis inhibitor precursor 3: gi|32891795 clusterin (complement lysis inhibitor, SP-40,40, sulfated glycoprotein 2, testosterone-repressed pr 4: gi|42740907 clusterin isoform 2 [Homo sapiens] 5: gi|57997569 hypothetical protein [Homo sapiens] 6: gi|338057 sulfated glycoprotein-2	48772.1	77	100	4	4	ELDESLQVAER	64	644.859	1287.7	1287.63	57.3154	"(gi|180620) (gi|32891795) (gi|42740907) (gi|57997569) (gi|338057)
								ASSIIDELFQDR	45	697.393	1392.77	1392.69	60.254
								TLLSNLEEAK	35	559.345	1116.68	1116.6	66.0065
								RPHFFFPK	33	359.231	1074.67	1074.58	87.0538
108	3152	1: gi|42716297 clusterin isoform 1 [Homo sapiens]	57795.6	77	100	4	4	ELDESLQVAER	64	644.859	1287.7	1287.63	57.3154	"
								ASSIIDELFQDR	45	697.393	1392.77	1392.69	60.254
								TLLSNLEEAK	35	559.345	1116.68	1116.6	66.0065
								RPHFFFPK	33	359.231	1074.67	1074.58	87.0538
109	3203	1: gi|178853 apolipoprotein E	36184.8	93	100	7	8	LGADMEDVR	53	503.312	1004.61	1004.46	148.818	"
								SELEEQLTPVAEETR	50	866.024	1730.03	1729.84	113.985
								AATVGSLAGQPLQER	46	749.483	1496.95	1496.79	105.288
								LGPLVEQGR	45	484.822	967.63	967.545	87.3189
								LAVYQAGAR	42	474.827	947.639	947.519	127.252
								AKLEEQAQQIR	36	657.421	1312.83	1312.71	90.2979
								DRLDEVKEQVAEVR	35	562.715	1685.12	1684.87	146.991
								LQAEAFQAR	34	517.323	1032.63	1032.54	93.0622
109	3203	1: gi|443295 Chain A, Transthyretin (Formerly Prealbumin) 2: gi|2098255 Chain A, Tertiary Structures Of Three Amyloidogenic Transthyretin Variants And Implications For Amy 3: gi|2098257 Chain A, Tertiary Structures Of Three Amyloidogenic Transthyretin Variants And Implications For Amy 4: gi|3891560 Chain A, Tertiary Structures Of Three Amyloidogenic Transthyretin Variants And Implications For Amy…	13752.9	56	99	2	2	TSESGELHGLTTEEEFVEGIYK	45	819.149	2454.43	2454.14	115.192	"(gi|2098255) (gi|2098257) (gi|3891560) (gi|4507725) (gi|62738386) (gi|73535906) (gi|55669575)
								AADDTWEPFASGK	35	697.879	1393.74	1393.61	91.6961
110	3185	1: gi|443295 Chain A, Transthyretin (Formerly Prealbumin) 2: gi|2098257 Chain A, Tertiary Structures Of Three Amyloidogenic Transthyretin Variants And Implications For Amy 3: gi|62738386 Chain A, The X-Ray Crystallographic Structure Of The Amyloidogenic Variant Ttr Tyr78phe 4: gi|73535906 Chain A, Crystal Structure Of Human Transthyretin With Bound Iodide	13752.9	186	100	8	8	AADDTWEPFASGK	67	697.877	1393.74	1393.61	88.734	"(gi|2098257) (gi|62738386) (gi|73535906)
								GSPAINVAVHVFR	59	456.306	1365.9	1365.75	105.699
								YTIAALLSPYSYSTTAVVTNPKE	43	830.7	2489.08	2488.27	323.319
								GSPAINVAVHVFRK	41	499.013	1494.02	1493.85	114.743
								GPTGTGESK	34	417.242	832.469	832.393	91.4304
								RYTIAALLSPYSYSTTAVVTNPKE	33	882.551	2644.63	2644.37	96.6058
								RYTIAALLSPYSYSTTAVVTNPK	33	839.545	2515.61	2515.33	111.707
								ALGISPFHEHAEVVFTANDSGPR	31	613.626	2450.48	2450.2	113.361
110	3185	1: gi|178853 apolipoprotein E	36184.8	108	100	6	6	LGADMEDVR	66	503.286	1004.56	1004.46	97.1428	"
								SELEEQLTPVAEETR	50	866.002	1729.99	1729.84	87.6539
								VQAAVGTSAAPVPSDNH	41	810.977	1619.94	1619.79	91.8749
								AATVGSLAGQPLQER	40	749.472	1496.93	1496.79	90.1413
								DRLDEVKEQVAEVR	36	562.704	1685.09	1684.87	128.701
								LQAEAFQAR	35	517.322	1032.63	1032.54	92.086
110	3185	1: gi|178855 apolipoprotein J precursor 2: gi|180620 complement cytolysis inhibitor precursor 3: gi|338057 sulfated glycoprotein-2 4: gi|338305 'SP40,40' 5: gi|32891795 clusterin (complement lysis inhibitor, SP-40,40, sulfated glycoprotein 2, testosterone-repressed pr 6: gi|42716297 clusterin isoform 1 [Homo sapiens] 7: gi|42740907 clusterin isoform 2 [Homo sapiens]	48772.1	53	98	2	2	ELDESLQVAER	52	644.881	1287.75	1287.63	90.2782	"(gi|180620) (gi|338057) (gi|338305) (gi|32891795) (gi|42716297) (gi|42740907)
								ASSIIDELFQDR	32	697.437	1392.86	1392.69	122.498
111	3069	1: gi|338305 'SP40,40' 2: gi|178855 apolipoprotein J precursor 3: gi|180620 complement cytolysis inhibitor precursor 4: gi|338057 sulfated glycoprotein-2 5: gi|32891795 clusterin (complement lysis inhibitor, SP-40,40, sulfated glycoprotein 2, testosterone-repressed pr 6: gi|42716297 clusterin isoform 1 [Homo sapiens] 7: gi|42740907 clusterin isoform 2 [Homo sapiens] 8: gi|57997569 hypothetical pr…	36712	56	95	1	1	LFDSDPITVTVPVEVSR	56	625.377	1873.11	1872.98	66.9766	"(gi|178855) (gi|180620) (gi|338057) (gi|32891795) (gi|42716297) (gi|42740907) (gi|57997569)
113	3133	1: gi|178853 apolipoprotein E	36184.8	416	100	16	17	GEVQAMLGQSTEELR	122	824.449	1646.88	1646.79	54.427	"
								GEVQAMLGQSTEELR	84	555.297	1662.87	1662.79	48.996	Oxidation (M)
								SELEEQLTPVAEETR	72	865.974	1729.93	1729.84	55.2127
								WVQTLSEQVQEELLSSQVTQELR	68	910.861	2729.56	2729.39	64.1921
								SWFEPLVEDMQR	63	768.904	1535.79	1535.71	55.8654
								AYKSELEEQLTPVAEETR	54	698.402	2092.18	2092.03	72.6724
								LKSWFEPLVEDMQR	52	593.335	1776.98	1776.89	54.7013
								GEVQAMLGQSTEELRVR	52	635.035	1902.08	1901.96	62.659
								QWAGLVEK	51	465.772	929.53	929.497	35.885
								LQAEAFQAR	51	516.796	1031.58	1032.54	-927.12
								SELEEQLTPVAEETR	49	577.664	1729.97	1729.84	76.9789
								QQTEWQSGQR	49	624.309	1246.6	1246.57	28.3883
								LGPLVEQGR	43	484.78	967.546	967.545	1.14413
								SWFEPLVEDMQR	35	777.2	1552.39	1551.7	439.971	Oxidation (M)
								LGADMEDVR	33	511.252	1020.49	1020.45	35.0971	Oxidation (M)
								LKSWFEPLVEDMQR	31	598.674	1793	1792.88	66.638	Oxidation (M)
113	3133	1: gi|338057 sulfated glycoprotein-2 2: gi|178855 apolipoprotein J precursor 3: gi|180620 complement cytolysis inhibitor precursor 4: gi|32891795 clusterin (complement lysis inhibitor, SP-40,40, sulfated glycoprotein 2, testosterone-repressed pr 5: gi|42740907 clusterin isoform 2 [Homo sapiens] 6: gi|42716297 clusterin isoform 1 [Homo sapiens]	45786.5	215	100	7	7	ASSIIDELFQDR	99	697.392	1392.77	1392.69	57.8629	"(gi|178855) (gi|180620) (gi|32891795) (gi|42740907) (gi|42716297)
								ELDESLQVAER	91	644.842	1287.67	1287.63	30.6322
								LFDSDPITVTVPVEVSR	58	625.37	1873.09	1872.98	56.7288
								VTTVASHTSDSDVPSGVTEVVVK	56	772.11	2313.31	2313.17	59.2697
								TLLSNLEEAK	54	559.336	1116.66	1116.6	48.5697
								ASSIIDELFQDRFFTR	40	649.042	1944.11	1943.97	67.6485
								VTTVASHTSDSDVPSGVTEVVVK	31	772.111	2313.31	2313.17	61.3474
113	3133	1: gi|178853 apolipoprotein E 2: gi|364011 apolipoprotein E mutant E3K 3: gi|4557325 apolipoprotein E precursor [Homo sapiens]	36184.8	283	100	14	10	AATVGSLAGQPLQER	74	749.41	1496.81	1496.79	7.21609	"(gi|364011) (gi|4557325)
								LAVYQAGAR	74	474.77	947.525	947.519	7.00144
								LGPLVEQGR	72	484.78	967.545	967.545	0.433055
								DADDLQKR	62	480.74	959.465	959.467	-1.83539
								LQAEAFQAR	57	517.28	1032.55	1032.54	9.92315
								VQAAVGTSAAPVPSDNH	55	810.91	1619.81	1619.79	9.35306
								AKLEEQAQQIR	40	438.58	1312.72	1312.71	6.32508
								AQAWGER	40	409.2	816.385	816.388	-2.90181
								LKSWFEPLVEDMQR	37	598.64	1792.9	1792.88	9.15398	Oxidation (M)
								QWAGLVEK	35	465.76	929.505	929.497	9.06189
113	3133	1: gi|178855 apolipoprotein J precursor 2: gi|180620 complement cytolysis inhibitor precursor 3: gi|338057 sulfated glycoprotein-2 4: gi|338305 'SP40,40' 5: gi|32891795 clusterin (complement lysis inhibitor, SP-40,40, sulfated glycoprotein 2, testosterone-repressed pr 6: gi|42716297 clusterin isoform 1 [Homo sapiens] 7: gi|42740907 clusterin isoform 2 [Homo sapiens] 8: gi|57997569 hypothetical pr…	48772.1	80	100	2	2	KYNELLK	60	454.27	906.525	906.517	8.84925	"(gi|180620) (gi|338057) (gi|338305) (gi|32891795) (gi|42716297) (gi|42740907) (gi|57997569)
								FMETVAEK	47	485.73	969.445	969.448	-2.31575	Oxidation (M)
114	3151	1: gi|178853 apolipoprotein E	36184.8	270	100	10	10	SELEEQLTPVAEETR	81	865.977	1729.94	1729.84	59.3264	"
								WVQTLSEQVQEELLSSQVTQELR	76	910.861	2729.56	2729.39	63.9503
								AKLEEQAQQIR	70	657.384	1312.75	1312.71	32.4893
								GEVQAMLGQSTEELR	65	824.451	1646.89	1646.79	57.4
								SWFEPLVEDMQR	63	768.91	1535.81	1535.71	64.2095
								SELEEQLTPVAEETR	58	865.976	1729.94	1729.84	57.6245
								AYKSELEEQLTPVAEETR	56	698.388	2092.14	2092.03	52.6651
								QQTEWQSGQR	43	624.327	1246.64	1246.57	57.1489
								LGADMEDVR	42	511.256	1020.5	1020.45	41.2277	Oxidation (M)
								QWAGLVEK	32	465.778	929.541	929.497	47.1986
114	3151	1: gi|178855 apolipoprotein J precursor 2: gi|180620 complement cytolysis inhibitor precursor 3: gi|32891795 clusterin (complement lysis inhibitor, SP-40,40, sulfated glycoprotein 2, testosterone-repressed pr 4: gi|42740907 clusterin isoform 2 [Homo sapiens] 5: gi|338057 sulfated glycoprotein-2 6: gi|42716297 clusterin isoform 1 [Homo sapiens]	48772.1	237	100	9	8	ASSIIDELFQDR	99	697.39	1392.77	1392.69	55.9615	"(gi|180620) (gi|32891795) (gi|42740907) (gi|338057) (gi|42716297)
								KTLLSNLEEAK	76	623.394	1244.77	1244.7	61.5627
								QQTHMLDVMQDHFSR	70	624.981	1871.92	1871.84	43.1281
								TLLSNLEEAK	57	559.343	1116.67	1116.6	62.469
								KTLLSNLEEAK	46	623.393	1244.77	1244.7	59.8418
								TLLSNLEEAKK	39	623.394	1244.77	1244.7	60.4315
								KTLLSNLEEAK	38	623.387	1244.76	1244.7	50.413
								RPHFFFPK	31	359.22	1074.64	1074.58	56.841
114	3151	1: gi|4557032 lactate dehydrogenase B [Homo sapiens] 2: gi|13786847 Chain A, Human Heart L-Lactate Dehydrogenase H Chain, Ternary Complex With Nadh And Oxamate 3: gi|49259209 Chain A, Human B Lactate Dehydrogenase Complexed With Nad+ And 4- Hydroxy-1,2,5-Oxadiazole-3-Carbox	36615.1	67	100	3	3	SADTLWDIQK	53	588.84	1175.66	1175.58	70.332	"(gi|13786847) (gi|49259209)
								MVVESAYEVIK	36	634.366	1266.72	1266.65	51.1806
								FIIPQIVK	34	479.34	956.665	956.606	61.9754
114	3151	1: gi|178849 apolipoprotein E 2: gi|178853 apolipoprotein E 3: gi|364011 apolipoprotein E mutant E3K 4: gi|4557325 apolipoprotein E precursor [Homo sapiens]	36187.8	222	100	6	6	AATVGSLAGQPLQER	77	749.41	1496.81	1496.79	7.21609	"(gi|178853) (gi|364011) (gi|4557325)
								VQAAVGTSAAPVPSDNH	71	810.91	1619.81	1619.79	9.35306
								LGPLVEQGR	67	484.78	967.545	967.545	0.433055
								LAVYQAGAR	59	474.77	947.525	947.519	7.00144
								LQAEAFQAR	49	517.28	1032.55	1032.54	9.92315
								AKLEEQAQQIR	35	438.58	1312.72	1312.71	6.32508
115	3249	1: gi|178855 apolipoprotein J precursor 2: gi|180620 complement cytolysis inhibitor precursor 3: gi|32891795 clusterin (complement lysis inhibitor, SP-40,40, sulfated glycoprotein 2, testosterone-repressed pr 4:gi| 42740907 clusterin isoform 2 [Homo sapiens] 5: gi|5799759 hypothetical protein [Homo sapiens] 6: gi|338057 sulfated glycoprotein-2 7: gi|42716297 clusterin isoform 1 [Homo sapiens]	48772	145	100	4	4	RPHFFFPK	32	359.225	1074.65	1074.58	72.6798
								TLLSNLEEAK	31	559.349	1116.68	1116.6	71.825
								TLLSNLEEAKK	44	623.389	1244.76	1244.7	53.3463
								KTLLSNLEEAK	45	623.402	1244.79	1244.7	73.8332
116	3118	1: gi|178849 apolipoprotein E 2: gi|178853 apolipoprotein E 3: gi|364011 apolipoprotein E mutant E3K 4: gi|4557325 apolipoprotein E precursor [Homo sapiens]	36187.8	171	100	5	5	WVQTLSEQVQEELLSSQVTQELR	95	910.851	2729.53	2729.39	52.2685	"(gi|178853) (gi|364011) (gi|4557325)
								SWFEPLVEDMQR	75	768.901	1535.79	1535.71	51.7996
								SELEEQLTPVAEETR	67	865.979	1729.94	1729.84	61.374
								QWAGLVEK	41	465.779	929.544	929.497	50.1207
								AYKSELEEQLTPVAEETR	40	698.391	2092.15	2092.03	56.9499
116	3118	1: gi|443295 Chain A, Transthyretin (Formerly Prealbumin) 2: gi|2098255 Chain A, Tertiary Structures Of Three Amyloidogenic Transthyretin Variants And Implications For Amy 3: gi|2098257 Chain A, Tertiary Structures Of Three Amyloidogenic Transthyretin Variants And Implications For Amy 4: gi|3891560 Chain A, Tertiary Structures Of Three Amyloidogenic Transthyretin Variants And Implications For Amy…	13752.9	119	100	16	5	TSESGELHGLTTEEEFVEGIYKVEIDTK	59	785.936	3139.71	3139.51	65.7259	"(gi|2098255) (gi|2098257) (gi|3891560) (gi|4507725) (gi|55669575) (gi|62738386) (gi|73535906)
								YTIAALLSPYSYSTTAVVTNPKE	45	830.474	2488.4	2488.27	50.49
								AADDTWEPFASGK	43	697.855	1393.69	1393.61	57.1112
								GSPAINVAVHVFR	35	456.286	1365.84	1365.75	62.5209
116	3118	1: gi|178849 apolipoprotein E 2: gi|178853 apolipoprotein E 3: gi|364011 apolipoprotein E mutant E3K 4: gi|4557325 apolipoprotein E precursor [Homo sapiens]	36187.8	170	100	5	5	LGPLVEQGR	73	484.78	967.545	967.545	0.433055	"(gi|178853) (gi|364011) (gi|4557325)
								LAVYQAGAR	71	474.77	947.525	947.519	7.00144
								LQAEAFQAR	48	517.28	1032.55	1032.54	9.92315
								AATVGSLAGQPLQER	42	749.41	1496.81	1496.79	7.21609
								QWAGLVEK	40	465.76	929.505	929.497	9.06189
117	5698	1: gi|178855 apolipoprotein J precursor 2: gi|180620 complement cytolysis inhibitor precursor 3: gi|338057 sulfated glycoprotein-2 4: gi|32891795 clusterin (complement lysis inhibitor, SP-40,40, sulfated glycoprotein 2, testosterone-repressed pr 5: gi|42740907 clusterin isoform 2 [Homo sapiens] 6: gi|57997569 hypothetical protein [Homo sapiens] 7: gi|42716297 clusterin isoform 1 [Homo sapiens]	48772	61	88	1	1	TLLSNLEEAK	23	559.368	1116.72	1116.6	107.111
								LFDSDPITVTVPVEVSR	40	625.394	1873.16	1872.98	94.1813
118	2819	1: gi|40737343 C4B3 [Homo sapiens] 2: gi|40737308 C4B1 [Homo sapiens] 3: gi|40737313 C4B1 [Homo sapiens] 4: gi|40737318 C4B [Homo sapiens] 5: gi|40737408 C4B5 [Homo sapiens] 6: gi|40737466 C4B1 [Homo sapiens] 7: gi|40737468 C4A [Homo sapiens] 8: gi|40737470 C4A [Homo sapiens] 9: gi|40737474 C4A3 [Homo sapiens] 10: gi|40737478 C4A3 [Homo sapiens] 11: gi|40737482 C4A [Homo sapiens] 12: gi|40737486 …	47424.2	182	100	6	6	SFFPENWLWR	61	691.385	1380.75	1380.66	67.48	"(gi|40737308) (gi|40737313) (gi|40737318) (gi|40737408) (gi|40737466) (gi|40737468) (gi|40737470) (gi|40737474) (gi|40737478) (gi|40737482) (gi|40737486) (gi|179674) (gi|443671) (gi|2347136) (gi|38649251) (gi|50345296) (gi|57209758) (gi|67190748) (gi|68533033) (gi|1314244)
								ALEILQEEDLIDEDDIPVR	61	742.442	2224.31	2224.11	87.3639
								EGAIHREELVYELNPLDHR	60	573.339	2289.33	2289.15	76.9893
								GSFEFPVGDAVSK	58	670.374	1338.73	1338.65	65.5872
								GLCVATPVQLR	42	607.389	1212.76	1212.66	80.5012	Carbamidomethyl (C)
								TLEIPGNSDPNMIPDGDFNSYVR	40	856.474	2566.4	2566.16	91.6188	Oxidation (M)
119	3137	1: gi|338305 'SP40,40' 2: gi|178855 apolipoprotein J precursor 3: gi|180620 complement cytolysis inhibitor precursor 4: gi|338057 sulfated glycoprotein-2 5: gi|32891795 clusterin (complement lysis inhibitor, SP-40,40, sulfated glycoprotein 2, testosterone-repressed pr 6: gi|42716297 clusterin isoform 1 [Homo sapiens] 7: gi|42740907 clusterin isoform 2 [Homo sapiens]	36712	115	100	3	3	LFDSDPITVTVPVEVSR	78	937.545	1873.08	1872.98	49.049	"(gi|178855) (gi|180620) (gi|338057) (gi|32891795) (gi|42716297) (gi|42740907)
								ASSIIDELFQDR	52	697.387	1392.76	1392.69	51.1751
								VTTVASHTSDSDVPSGVTEVVVK	46	772.11	2313.31	2313.17	59.7302

## Sheet: Sheet2
			Supplemental Table x. Mass Spectrometry and Database Search Results
			Database: nr_20070218 20070218 (4641100 sequences; 1602026208 residues)
			Database searching: Mascot Distiller (no spectra combining); Mascot version 2.2.04
			Protein Identification/ Spectral counting Quantification: Scaffold Proteome Software version 2.06.02
Heatmap #	Spot	(Accession) Primary Protein Name	Protein Molecular Weight	Protein Score	Protein Identification Probability	Spectral Count	Unique Peptides	Peptide Sequence	Mascot Ion Score	m/z (observed)	Mass (observed)	Mass (theoretical)	Mass Error (ppm)	MS source	Modifications
1	4709	1: 31543193 hypothetical protein LOC146556 [Homo sapiens], gi|22761204|dbj|BAC11494.1| unnamed protein product [Homo sapiens]	48767.7	88	92	1	1	ATIADLILSALER	88	693.449	1384.88	1384.79	65.425	Q-STAR
2	5659	1: gi|4502807 chromogranin B precursor [Homo sapiens] 2: gi|5834566 chromogranin B (secretogranin 1) [Homo sapiens] 3: gi|62089004 chromogranin B precursor variant [Homo sapiens]	78199.2	76	100	3	2	ELENLAAMDLELQK	65	808.997	1615.98	1615.81	103.252	Q-STAR	"(gi|5834566) (gi|62089004)
3	4683	1: gi|4502101 annexin I [Homo sapiens]	38690	283	100	8	9	GTDVNVFNTILTTR	101	775.96	1549.9	1549.81	61.0694	Q-STAR	"
								TPAQFDADELR	90	631.839	1261.66	1261.59	54.6016	Q-STAR
								GVDEATIIDILTK	89	694.441	1386.87	1386.76	76.4674	Q-STAR
								TPAQFDADELR	55	631.837	1261.66	1261.59	51.3279	Q-STAR
								GVDEATIIDILTKR	46	515.333	1542.98	1542.86	74.7591	Q-STAR
								KGTDVNVFNTILTTR	45	560.347	1678.02	1677.9	67.2249	Q-STAR
								DLAKDITSDTSGDFR	42	547.641	1639.9	1639.77	80.3924	Q-STAR
								AMVSEFLK	40	491.78	981.546	981.484	62.6724	Q-STAR	Acetyl (N-term); Oxidation (M)
								RKGTDVNVFNTILTTR	35	612.387	1834.14	1834.01	72.6633	Q-STAR
4	4608	1:gi|4502807 chromogranin B precursor [Homo sapiens] 2: gi|5834566 chromogranin B (secretogranin 1) [Homo sapiens]	78199	259	100	4		VAQLDQLLHYR	57	452.59	1354.75	1354.74	9.22689	LTQ-FT
								ADQTVLTEDEKK	42	459.57	1375.69	1375.68	3.70725	LTQ-FT
								DPADASEAHESSSR	68	486.87	1457.59	1457.6	-9.399	LTQ-FT
								GEAGAPGEEDIQGPTK	86	778.37	1554.73	1554.72	5.9818	LTQ-FT
4	4608	1: gi|62089004 chromogranin B precursor variant [Homo sapiens]	81555	258	100	4		DPADATEAHESSSR	67	491.5500	1471.63	1471.62	7.27091	LTQ-FT
4	4608	1:gi|134464 Secretogranin-2 precursor (Secretogranin II) (SgII) (Chromogranin C) 2: gi|18490917 Secretogranin II (chromogranin C) [Homo sapiens] 3: gi|68160947 secretogranin II precursor [Homo sapiens]	70825	146	100	2		LENVQK	19	365.71	729.405	729.402	4.52425	LTQ-FT
								ALEYIENLR	68	560.8	1119.59	1119.59	-6.25228	LTQ-FT
								QAENEPQSAPK	50	599.79	1197.57	1197.56	2.42159	LTQ-FT
4	4608	1: gi|181387 cystatin C 2: gi|4503107 cystatin C precursor [Homo sapiens] 3: gi|14278690 Chain A, Human Cystatin C; Dimeric Form With 3d Domain Swapping	15819.1	106	100	2	2	ALDFAVGEYNK	68	613.81	1225.61	1225.6	6.2	LTQ-FT	"(gi|4503107) (gi|14278690)
								LVGGPMDASVEEEGVRR	67	606.3	1815.88	1815.88	0.1	LTQ-FT	Oxidation (M)
5	4297	1: gi|4502807 chromogranin B precursor [Homo sapiens] 2: gi|5834566 chromogranin B (secretogranin 1) [Homo sapiens] 3: gi|62089004 chromogranin B precursor variant [Homo sapiens]	78199	64	99	2	2	ELENLAAMDLELQK	64	808.985	1615.95	1615.81	88.0052	Q-STAR
								ADQTVLTEDEKKELENLAAMDLELQK		744.432	2973.7	2973.49	71.3977	Q-STAR
								ADQTVLTEDEKKELENLAAMDLELQK		748.441	2989.73	2989.48	84.8977	Q-STAR
6	4545	no data
7	4695	1: gi|4502807 chromogranin B precursor [Homo sapiens]	78313.2	209	100	16	9	DPADASEAHESSSR	67	729.811	1457.61	1457.6	3.3	LTQ-FT	"
								HLEEPGETQNAFLNER	51	628.639	1882.9	1882.88	8.1	LTQ-FT
								ADQTVLTEDEKK	51	688.85	1375.69	1375.68	1.5	LTQ-FT
								ELENLAAMDLELQK	39	544.947	1631.82	1631.81	8	LTQ-FT	Oxidation (M)
								DRADQTVLTEDEKK	36	549.945	1646.81	1646.81	1.8	LTQ-FT
								ADQTVLTEDEKK	35	459.569	1375.68	1375.68	0.6	LTQ-FT
								ADQTVLTEDEK	35	624.804	1247.59	1247.59	3.6	LTQ-FT
								EDEEEEEGENYQK	33	814.322	1626.63	1626.62	7.7	LTQ-FT
7	4695	1: gi|5834566 chromogranin B (secretogranin 1) [Homo sapiens]	78343.2	202	100	16	8	DPADASEAHESSSR	67	729.811	1457.61	1457.6	3.3	LTQ-FT	"
								HLEEPGETQNAFLNER	51	628.639	1882.9	1882.88	8.1	LTQ-FT
								ADQTVLTEDEKK	51	688.85	1375.69	1375.68	1.5	LTQ-FT
								ELENLAAMDLELQK	39	544.947	1631.82	1631.81	8	LTQ-FT	Oxidation (M)
								DRADQTVLTEDEKK	36	549.945	1646.81	1646.81	1.8	LTQ-FT
								ADQTVLTEDEKK	35	459.569	1375.68	1375.68	0.6	LTQ-FT
								ADQTVLTEDEK	35	624.804	1247.59	1247.59	3.6	LTQ-FT
								EDEEEEEGENYQK	33	814.322	1626.63	1626.62	7.7	LTQ-FT
7	4695	1: gi|62089004 chromogranin B precursor variant [Homo sapiens]	81668.9	176	100	16	9	HLEEPGETQNAFLNER	51	628.639	1882.9	1882.88	8.1	LTQ-FT	"
								ADQTVLTEDEKK	51	688.85	1375.69	1375.68	1.5	LTQ-FT
								ELENLAAMDLELQK	39	544.947	1631.82	1631.81	8	LTQ-FT	Oxidation (M)
								GYPGVQGPEDLEWER	38	866.412	1730.81	1730.79	11	LTQ-FT
								DRADQTVLTEDEKK	36	549.945	1646.81	1646.81	1.8	LTQ-FT
								ADQTVLTEDEKK	35	459.569	1375.68	1375.68	0.6	LTQ-FT
								ADQTVLTEDEK	35	624.804	1247.59	1247.59	3.6	LTQ-FT
								EDEEEEEGENYQK	33	814.322	1626.63	1626.62	7.7	LTQ-FT
7	4695	1: gi|2724106 RIG-like 7-1 [Homo sapiens] 2: gi|11281120 REIC protein - human 3: gi|13124091 Dickkopf-related protein 3 precursor (Dkk-3) (Dickkopf-3) (hDkk-3) 4: gi|40548389 dickkopf homolog 3 precursor [Homo sapiens] 5: gi|46277118 putative tumor suppressor Dkk-3/REIC [Homo sapiens]	20354.3	61	91	1	1	DQDGEILLPR	61	578.308	1154.6	1154.59	6.5	LTQ-FT	"(gi|11281120) (gi|13124091) (gi|40548389) (gi|46277118)
7		1: gi|337760 cerebroside sulfate activator protein 2: gi|337765 cerebroside sulfate activator protein 3: gi|337767 cerebroside sulfate activator protein 4: gi|1565257 cerebroside sulfate activator [Homo sapiens] 5: gi|11386147 prosaposin isoform a preproprotein [Homo sapiens] 6: gi|48145609 PSAP [Homo sapiens] 7: gi|57209714 prosaposin (variant Gaucher disease and variant metachromatic leukodystr…	60196.7	59	100	2	1	QEILAALEK	56	507.797	1013.58	1013.58	3.1	LTQ-FT	"(gi|337765) (gi|337767) (gi|1565257) (gi|11386147) (gi|48145609) (gi|57209714) (gi|62089138) (gi|62898141) (gi|110224476)
7	4695	1: gi|224917 lipoprotein CIII 2: gi|521205 apolipoprotein C-III 3: gi|4557323 apolipoprotein C-III precursor [Homo sapiens]	8759.22	53	91	2	1	DALSSVQESQVAQQAR	47	858.938	1715.86	1715.84	10.2	LTQ-FT	"(gi|521205) (gi|4557323)
8	4044	1: gi|4502807 chromogranin B precursor [Homo sapiens] 2: gi|5834566 chromogranin B (secretogranin 1) [Homo sapiens] 3: gi|62089004 chromogranin B precursor variant [Homo sapiens]	78199.2	71	95	1	1	ELENLAAMDLELQK	72	808.963	1615.91	1615.81	60.5516	Q-STAR	"
															Carbamidomethyl (C)
9	1314	1: gi|1621283 hBRAVO/Nr-CAM precursor	143194	459	100	16	16	SVQLSWTPGDDNNSPITK	76	653.698	1958.07	1957.94	68.5032	Q-STAR	Carbamidomethyl (C)
								TLQIIHVSEADSGNYQCIAK	76	749.75	2246.23	2246.1	57.4925	Q-STAR
								DSTGTYTCVAR	75	615.809	1229.6	1229.53	55.2217	Q-STAR
								SLPSEASEQYLTK	74	726.893	1451.77	1451.71	39.2646	Q-STAR
								YIVSGTPTFVPYLIK	63	849.517	1697.02	1696.94	44.4157	Q-STAR
								KIDGDTIIFSNVQER	62	579.008	1734	1733.89	62.2841	Q-STAR
								LLEDLVQPPTITQQSPK	54	636.386	1906.14	1906.04	49.9968	Q-STAR
								HDHTLSLTVLWLK	52	521.657	1561.95	1561.86	56.0799	Q-STAR	Carbamidomethyl (C)
								VKHDHTLSLTVLWLK	50	597.387	1789.14	1789.03	64.3513	Q-STAR	Carbamidomethyl (C)
								AAPYWITAPQNLVLSPGEDGTLICR	49	914.857	2741.55	2741.38	60.1831	Q-STAR
								ENIVIQCEAK	46	602.33	1202.64	1202.6	40.2055	Q-STAR
								ISWLTNGVPIEIAPDDPSR	44	694.066	2079.18	2079.06	54.69	Q-STAR
								LSPYVNYSFR	41	623.351	1244.69	1244.62	55.1325	Q-STAR	Carbamidomethyl (C)
								DYIIDPR	39	446.253	890.492	890.45	47.0998	Q-STAR
								GNVLSLECIAEGLPTPIIYWAK	32	815.488	2443.44	2443.28	66.118	Q-STAR
								DATWIVK	31	416.758	831.501	831.449	62.0459	Q-STAR	"
															Carbamidomethyl (C)
9	1314	1: gi|51095143 neuronal cell adhesion molecule [Homo sapiens]	130938	450	100	7	16	SVQLSWTPGDDNNSPITK	76	653.698	1958.07	1957.94	68.5032	Q-STAR	Carbamidomethyl (C)
								TLQIIHVSEADSGNYQCIAK	76	749.75	2246.23	2246.1	57.4925	Q-STAR
								DSTGTYTCVAR	75	615.809	1229.6	1229.53	55.2217	Q-STAR
								SLPSEASEQYLTK	74	726.893	1451.77	1451.71	39.2646	Q-STAR
								YIVSGTPTFVPYLIK	63	849.517	1697.02	1696.94	44.4157	Q-STAR
								KIDGDTIIFSNVQER	62	579.008	1734	1733.89	62.2841	Q-STAR
								HDHTLSLTVLWLK	52	521.657	1561.95	1561.86	56.0799	Q-STAR	Carbamidomethyl (C)
								VKHDHTLSLTVLWLK	50	597.387	1789.14	1789.03	64.3513	Q-STAR	Carbamidomethyl (C)
								AAPYWITAPQNLVLSPGEDGTLICR	49	914.857	2741.55	2741.38	60.1831	Q-STAR
								ENIVIQCEAK	46	602.33	1202.64	1202.6	40.2055	Q-STAR
								ISWLTNGVPIEIAPDDPSR	44	694.066	2079.18	2079.06	54.69	Q-STAR
								LSPYVNYSFR	41	623.351	1244.69	1244.62	55.1325	Q-STAR
								NEVHLEIKDATWIVK	41	599.032	1794.07	1793.97	58.8734	Q-STAR	Carbamidomethyl (C)
								DYIIDPR	39	446.253	890.492	890.45	47.0998	Q-STAR
								GNVLSLECIAEGLPTPIIYWAK	32	815.488	2443.44	2443.28	66.118	Q-STAR
								DATWIVK	31	416.758	831.501	831.449	62.0459	Q-STAR	"(gi|4096840) (gi|31542984)
9	1314	1: gi|1483187 inter-alpha-trypsin inhibitor family heavy chain-related protein (IHRP) [Homo sapiens] 2: gi|4096840 inter-alpha-trypsin inhibitor family heavy chain-related protein [Homo sapiens] 3: gi|31542984 inter-alpha (globulin) inhibitor H4 [Homo sapiens]	103321	152	100	7	7	LGVYELLLK	53	524.356	1046.7	1046.64	57.7956	Q-STAR
								FSSHVGGTLGQFYQEVLWGSPAASDDGRR	53	781.919	3123.65	3123.48	53.6914	Q-STAR
								ITFELVYEELLKR	51	551.682	1652.02	1651.92	64.4112	Q-STAR
								QLGLPGPPDVPDHAAYHPFRR	43	585.835	2339.31	2339.19	51.3716	Q-STAR
								QLGLPGPPDVPDHAAYHPFR	38	546.813	2183.22	2183.09	59.9723	Q-STAR
								AGFSWIEVTFK	36	642.874	1283.73	1283.65	60.5988	Q-STAR
								QGPVNLLSDPEQGVEVTGQYER	34	805.774	2414.3	2414.17	53.0381	Q-STAR	"(gi|13874433)
														Q-STAR	Carbamidomethyl (C)
9	1314	1: gi|5453766 nel-like 2 [Homo sapiens] 2: gi|13874433 cerebral protein-12 [Homo sapiens]	91284.5	52	100	3	3	AFLFQDTPR	47	547.821	1093.63	1093.56	66.003	Q-STAR
								LSLAISASHLILHIDCNK	32	669.068	2004.18	2004.08	49.968	Q-STAR	"
10	1320	1: gi|1621283 hBRAVO/Nr-CAM precursor	143194	376	100	12	12	SLPSEASEQYLTK	74	726.898	1451.78	1451.71	45.6929	Q-STAR	Carbamidomethyl (C)
								SVQLSWTPGDDNNSPITK	72	653.698	1958.07	1957.94	68.3546	Q-STAR
								TLQIIHVSEADSGNYQCIAK	66	749.758	2246.25	2246.1	67.1813	Q-STAR
								ISWLTNGVPIEIAPDDPSR	66	694.066	2079.18	2079.06	54.589	Q-STAR
								KIDGDTIIFSNVQER	66	579.016	1734.03	1733.89	75.1707	Q-STAR	Carbamidomethyl (C)
								YIVSGTPTFVPYLIK	60	849.524	1697.03	1696.94	53.2823	Q-STAR
								AAPYWITAPQNLVLSPGEDGTLICR	53	914.851	2741.53	2741.38	53.9038	Q-STAR
								VKHDHTLSLTVLWLK	50	597.388	1789.14	1789.03	65.1126	Q-STAR
								LLEDLVQPPTITQQSPK	48	636.387	1906.14	1906.04	52.0666	Q-STAR
								LSPYVNYSFR	40	623.353	1244.69	1244.62	57.6104	Q-STAR	Carbamidomethyl (C)
								HDHTLSLTVLWLK	34	521.662	1561.96	1561.86	65.9681	Q-STAR
								GNVLSLECIAEGLPTPIIYWAK	31	815.488	2443.44	2443.28	65.1554	Q-STAR	"(gi|4096840) (gi|31542984)
10	1320	1: gi|1483187 inter-alpha-trypsin inhibitor family heavy chain-related protein (IHRP) [Homo sapiens] 2: gi|4096840 inter-alpha-trypsin inhibitor family heavy chain-related protein [Homo sapiens] 3: gi|31542984 inter-alpha (globulin) inhibitor H4 [Homo sapiens]	103321	93	100	3	3	ITFELVYEELLKR	57	551.68	1652.02	1651.92	61.0315	Q-STAR
								LGVYELLLK	55	524.356	1046.7	1046.64	57.2471	Q-STAR	"(gi|29791402) (gi|29791405) (gi|30089935) (gi|30089937)
10	1320	1: gi|11360175 hypothetical protein DKFZp547E212.1 - human (fragment) 2: gi|29791402 TMEM132A protein [Homo sapiens] 3: gi|29791405 TMEM132A protein [Homo sapiens] 4: gi|30089935 transmembrane protein 132A isoform a [Homo sapiens] 5: gi|30089937 transmembrane protein 132A isoform b [Homo sapiens]	40680.1	81	100	2	2	AEELVNTAPLTGVPQHVPVR	58	709.764	2126.27	2126.15	57.5896	Q-STAR
								LTVWAPLLPLR	50	639.943	1277.87	1277.79	66.2537	Q-STAR	"(gi|13874433)
10	1320	1: gi|5453766 nel-like 2 [Homo sapiens] 2: gi|13874433 cerebral protein-12 [Homo sapiens]	91284.5	73	100	2	2	AFLFQDTPR	53	547.825	1093.64	1093.56	73.7137	Q-STAR
								VVEKPSTDLPLGTTFWLGQR	46	748.789	2243.34	2243.19	66.5653	Q-STAR	"(gi|33112413) (gi|6651380)
11	1382	1: gi|6651381 NgCAM-related related cell adhesion molecule /alternative carboxyl terminus [Homo sapiens] 2: gi|33112413 Neuronal cell adhesion molecule precursor (Nr-CAM) (NgCAM-related cell adhesion molecule) (Ng-CAM-r 3: gi|6651380 NgCAM-related related cell adhesion molecule [Homo sapiens]	136528	75	100	6	6	KIDGDTIIFSNVQER	42	579.044	1734.11	1733.89	124.809	Q-STAR	Carbamidomethyl (C)
								NEVHLEIK	40	491.321	980.627	980.529	100.076	Q-STAR
								ENIVIQCEAK	39	602.367	1202.72	1202.6	102.175	Q-STAR	Carbamidomethyl (C)
								LSPYVNYSFR	39	623.368	1244.72	1244.62	82.3618	Q-STAR
								AETYEGVYQCTAR	35	774.403	1546.79	1546.67	76.8262	Q-STAR
								NALGAIHHTISVR	35	463.646	1387.92	1387.77	106.307	Q-STAR	"(gi|178853) (gi|364011) (gi|4557325)
11	1382	1: gi|178849 apolipoprotein E 2: gi|178853 apolipoprotein E 3: gi|364011 apolipoprotein E mutant E3K 4: gi|4557325 apolipoprotein E precursor [Homo sapiens]	36187.8	69	100	4	4	SELEEQLTPVAEETR	47	866.02	1730.03	1729.84	109.154	Q-STAR
								AATVGSLAGQPLQER	47	749.462	1496.91	1496.79	77.366	Q-STAR
								LGPLVEQGR	42	484.842	967.67	967.545	129.233	Q-STAR
								LQAEAFQAR	40	517.315	1032.62	1032.54	78.4128	Q-STAR	"(gi|442751) (gi|1942682) (gi|1942686) (gi|3660145) (gi|4378804) (gi|4504349) (gi|6003534) (gi|18418633) (gi|61679604)
11	1382	1: gi|229752 Chain B, Alpha-Ferrous-Carbonmonoxy, Beta-Cobaltous-Deoxy Hemoglobin (T State) 2: gi|442751 Chain B, Hemoglobin Ypsilanti (Carbon Monoxy Form) 3: gi|1942682 Chain B, Deoxy (Beta-(C93a,C112g)) Human Hemoglobin 4: gi|1942686 Chain B, (Alpha-Oxy, Beta-(C112g)deoxy) T-State Human Hemoglobin 5: gi|3660145 Chain B, Crystal Structure Of S-Nitroso-Nitrosyl Human Hemoglobin A 6: gi|4378804 he…	15857.2	56	99	2	3	LLVVYPWTQR	38	637.929	1273.84	1273.72	97.94	Q-STAR
								VNVDEVGGEALGR	37	657.894	1313.77	1313.66	88.8519	Q-STAR
								VLGAFSDGLAHLDNLK	34	557.361	1669.06	1668.88	106.61	Q-STAR	"
11	1382	1: gi|66473265 beta globin chain [Homo sapiens]	11479.8	56	99	2	3	LLVVYPWTKR	38	637.929	1273.84	1273.75	69.3784	Q-STAR
								VNVDEVGGEALGR	37	657.894	1313.77	1313.66	88.8519	Q-STAR
								VLGAFSDGLAHLDNLK	34	557.361	1669.06	1668.88	106.61	Q-STAR	"
11	1382	1: gi|29446 unnamed protein product [Homo sapiens]	15956.2	56	99	2	3	LLVVYPWTQR	38	637.929	1273.84	1273.72	97.94	Q-STAR
								VNVDEVGGEALGR	37	657.894	1313.77	1313.66	88.8519	Q-STAR
								VLGAFSDGLAHLDNLK	34	557.361	1669.06	1668.88	106.61	Q-STAR	"(gi|1621283) (gi|6651380) (gi|33112413)
12	1383	1: gi|6651381 NgCAM-related related cell adhesion molecule /alternative carboxyl terminus [Homo sapiens] 2: gi|1621283 hBRAVO/Nr-CAM precursor 3: gi|6651380 NgCAM-related related cell adhesion molecule [Homo sapiens] 4: gi|33112413 Neuronal cell adhesion molecule precursor (Nr-CAM) (NgCAM-related cell adhesion molecule) (Ng-CAM-r	136528	85	100	5	4	SLPSEASEQYLTK	46	726.941	1451.87	1451.71	105.82	Q-STAR
								NALGAIHHTISVR	46	463.644	1387.91	1387.77	101.869	Q-STAR
								KIDGDTIIFSNVQER	42	579.024	1734.05	1733.89	89.6958	Q-STAR
								LLEDLVQPPTITQQSPK	36	636.441	1906.3	1906.04	135.879	Q-STAR	"(gi|5834566) (gi|62089004)
13	4033	1: gi|4502807 chromogranin B precursor [Homo sapiens] 2: gi|5834566 chromogranin B (secretogranin 1) [Homo sapiens] 3: gi|62089004 chromogranin B precursor variant [Homo sapiens]	78199.2	87	100	2	2	ELENLAAMDLELQK	70	808.967	1615.92	1615.81	66.1426	Q-STAR
								SAEFPDFYDSEEPVSTHQEAENEKDR	46	764.88	3055.49	3055.3	63.5696	Q-STAR	"(gi|5834566) (gi|62089004)
14	4191	1: gi|4502807 chromogranin B precursor [Homo sapiens] 2: gi|5834566 chromogranin B (secretogranin 1) [Homo sapiens] 3: gi|62089004 chromogranin B precursor variant [Homo sapiens]	78199.2	99	100	3	2	ELENLAAMDLELQK	76	808.973	1615.93	1615.81	73.381	Q-STAR
								SAEFPDFYDSEEPVSTHQEAENEKDR	42	764.897	3055.56	3055.3	86.1259	Q-STAR	"(gi|5834566) (gi|62089004)
15	4293	1: gi|4502807 chromogranin B precursor [Homo sapiens] 2: gi|5834566 chromogranin B (secretogranin 1) [Homo sapiens] 3: gi|62089004 chromogranin B precursor variant [Homo sapiens]	78199.2	63	95	1	1	ELENLAAMDLELQK	64	808.997	1615.98	1615.81	103.269	Q-STAR	"
15	4293	1: gi|71664 calmodulin - salmon 2: gi|825635 calmodulin [Homo sapiens] 3: gi|4502549 calmodulin 2 [Homo sapiens] 4: gi|66360457 Chain O, Crystal Structure Of Anthrax Edema Factor (Ef) Truncation Mutant, Ef-Delta 64 In Complex W	16695.8	510	100	16	16	VFDKDGNGYISAAELR	83	877.94	1753.87	1753.86	1.1	LTQ-FT	"(gi|825635) (gi|4502549) (gi|66360457)
								DGNGYISAAELR	82	633.31	1264.61	1264.6	0.5	LTQ-FT
								ADQLTEEQIAEFK	76	782.38	1562.75	1562.75	0.5	LTQ-FT	Acetyl (N-term)
								EADIDGDGQVNYEEFVQMMTAK	69	841.36	2521.06	2521.06	1.6	LTQ-FT	2 Oxidation (M)
								VFDKDGNGYISAAELR	61	585.63	1753.87	1753.86	2.7	LTQ-FT
								DGDGTITTK	61	454.22	906.425	906.429	4.3	LTQ-FT
								MKDTDSEEEIR	59	684.8	1367.59	1367.59	1.4	LTQ-FT	Oxidation (M)
								MKDTDSEEEIR	55	456.87	1367.59	1367.59	0.5	LTQ-FT	Oxidation (M)
								EAFSLFDKDGDGTITTK	55	922.95	1843.89	1843.88	0.8	LTQ-FT
								MKDTDSEEEIREAFR	53	624.62	1870.84	1870.84	0.8	LTQ-FT	Oxidation (M)
								DTDSEEEIR	52	547.24	1092.47	1092.46	7.6	LTQ-FT
								EAFSLFDKDGDGTITTK	50	615.64	1843.9	1843.88	7.7	LTQ-FT
								EAFSLFDK	49	478.74	955.465	955.465	0.4	LTQ-FT
								DTDSEEEIREAFR	47	532.91	1595.71	1595.71	1.1	LTQ-FT
								KMKDTDSEEEIR	34	499.57	1495.69	1495.68	3.8	LTQ-FT	Oxidation (M)
								ELGTVMR	33	411.21	820.405	820.411	7	LTQ-FT	Oxidation (M)
15	4293	1: gi|66360499 Chain O, Crystal Structure Of Anthrax Edema Factor (Ef) In Complex With Calmodulin In The Presence	16625.4	416			14	VFDKDGNGYISAAELR	83	877.94	1753.87	1753.86	1.1	LTQ-FT	"
								DGNGYISAAELR	82	633.31	1264.61	1264.6	0.5	LTQ-FT
								DGDGTITTK	61	454.22	906.425	906.429	4.3	LTQ-FT
								VFDKDGNGYISAAELR	61	585.63	1753.87	1753.86	2.7	LTQ-FT
								MKDTDSEEEIR	59	684.8	1367.59	1367.59	1.4	LTQ-FT	Oxidation (M)
								EAFSLFDKDGDGTITTK	55	922.95	1843.89	1843.88	0.8	LTQ-FT
								MKDTDSEEEIR	55	456.87	1367.59	1367.59	0.5	LTQ-FT	Oxidation (M)
								MKDTDSEEEIREAFR	53	624.62	1870.84	1870.84	0.8	LTQ-FT	Oxidation (M)
								DTDSEEEIR	52	547.24	1092.47	1092.46	7.6	LTQ-FT
								EAFSLFDKDGDGTITTK	50	615.64	1843.9	1843.88	7.7	LTQ-FT
								EAFSLFDK	49	478.74	955.465	955.465	0.4	LTQ-FT
								DTDSEEEIREAFR	47	532.91	1595.71	1595.71	1.1	LTQ-FT
								KMKDTDSEEEIR	34	499.57	1495.69	1495.68	3.8	LTQ-FT	Oxidation (M)
								ELGTVMR	33	411.21	820.405	820.411	7	LTQ-FT	Oxidation (M)
15	4293	1: gi|61680528 Chain A, Trapped Intermediate Of Calmodulin	16464.3	376			11	VFDKDGNGYISAAELR	83	877.94	1753.87	1753.86	1.1	LTQ-FT	"
								DGNGYISAAELR	82	633.31	1264.61	1264.6	0.5	LTQ-FT
								ADQLTEEQIAEFK	76	782.38	1562.75	1562.75	0.5	LTQ-FT	Acetyl (N-term)
								DGDGTITTK	61	454.22	906.425	906.429	4.3	LTQ-FT
								VFDKDGNGYISAAELR	61	585.63	1753.87	1753.86	2.7	LTQ-FT
								EAFSLFDKDGDGTITTK	55	922.95	1843.89	1843.88	0.8	LTQ-FT
								DTDSEEEIR	52	547.24	1092.47	1092.46	7.6	LTQ-FT
								EAFSLFDKDGDGTITTK	50	615.64	1843.9	1843.88	7.7	LTQ-FT
								EAFSLFDK	49	478.74	955.465	955.465	0.4	LTQ-FT
								DTDSEEEIREAFR	47	532.91	1595.71	1595.71	1.1	LTQ-FT
								ELGTVMR	33	411.21	820.405	820.411	7	LTQ-FT	Oxidation (M)
15	4293	1: gi|4505051 lymphocyte antigen 6 complex, locus H [Homo sapiens] 2: gi|48146185 LY6H [Homo sapiens]	14659.1	91	100	2	2	HFFSDYLMGFINSGILK	89	669	2003.98	2003.98	1.6	LTQ-FT	Oxidation (M)"(gi|48146185)
								ITDPSSSR	34	431.72	861.425	861.419	7.2	LTQ-FT
15	4293	1: gi|5031863 galectin 3 binding protein [Homo sapiens] 2: gi|5107533 Chain , Structure Of M2bp Scavenger Receptor Cysteine-Rich Domain	65289.3	88	92	1	1	LADGGATNQGR	88	530.26	1058.51	1058.51	4.7	LTQ-FT	"(gi|5107533)
15	4293	1: gi|17136078 VGF nerve growth factor inducible precursor [Homo sapiens] 2: gi|20140360 Neurosecretory protein VGF precursor	67217.6	78	100	2	2	NSEPQDEGELFQGVDPR	51	958.93	1915.85	1915.85	4.8	LTQ-FT	"(gi|20140360)
								GLQEAAEER	51	501.75	1001.49	1001.48	7.6	LTQ-FT
16	4266	1: gi|62089004 chromogranin B precursor variant [Homo sapiens]	81554.9	69	100	4	2	GYPGVQGPEDLEWER	63	866.461	1730.91	1730.79	67.9135	Q-STAR
								ELENLAAMDLELQK	38	808.967	1615.92	1615.81	65.9198	Q-STAR
17	4615	no data
18	4677	no data
19	4906	1: gi|14277770 Chain A, Nmr Structure Of Human Apolipoprotein C-Ii In The Presence Of Sds 2: gi|28949071 Chain A, Global Structure And Dynamics Of Human Apolipoprotein Cii In Complex With Micelles: Evidence For Increased Mobility Of The Helix Involvved In The Activation Of Lipoprotein Lipase	8909.38	87	100	2	3	TAAQNLYEK	59	519.267	1036.52	1036.52	0.3	LTQ-FT	"(gi|28949071)
								TQQPQQDEMPSPTFLTQVK	37	740.367	2218.08	2218.06	9	LTQ-FT	Oxidation (M)
								ESLSSYWESAK	34	643.804	1285.59	1285.58	8	LTQ-FT
19	4906	1: gi|5454032 S100 calcium binding protein A1 [Homo sapiens]	10539.1	151	100	4	3	GSELETAMETLINVFHAHSGK	72	777.05	2328.13	2328.11	9.7	LTQ-FT	Acetyl (N-term); Oxidation (M)"
								ELLQTELSGFLDAQK	66	564.63	1690.87	1690.88	5.6	LTQ-FT
								ELLQTELSGFLDAQK	55	846.45	1690.89	1690.88	4.5	LTQ-FT
19	4906	1: gi|7019519 proprotein convertase subtilisin/kexin type 1 inhibitor precursor [Homo sapiens]	27355.8	105	94	1	1	ILAGSADSEGVAAPR	105	707.37	1412.73	1412.73	0.3	LTQ-FT
19	4906	1: gi|62898141 prosaposin (variant Gaucher disease and variant metachromatic leukodystrophy) variant [Homo sapiens	58101.9	91	100	3	3	QEILAALEK	55	499.28	996.545	996.549	3.6	LTQ-FT	Pyro-glu (N-term Q)"
								QEILAALEK	54	507.8	1013.59	1013.58	9.6	LTQ-FT
								LVGYLDR	42	418.24	834.465	834.46	6.6	LTQ-FT
19	4906	1: gi|627391 brain-associated small cell lung cancer antigen - human (fragment)	1907.95	88	94	2	2	LQVDIVPSQGEISVGESK	70	943	1883.99	1883.98	0.7	LTQ-FT
								LQVDIVPSQGEISVGESK	44	629	1883.98	1883.98	3	LTQ-FT
19	4906	1: gi|178741 apolipoprotein C-II 2: gi|178825 apolipoprotein CII 3: gi|14277770 Chain A, Nmr Structure Of Human Apolipoprotein C-Ii In The Presence Of Sds 4: gi|28949071 Chain A, Global Structure And Dynamics Of Human Apolipoprotein Cii In Complex With Micelles: Eviden 5: gi|30582255 apolipoprotein C-II [Homo sapiens] 6: gi|32130518 apolipoprotein C-II precursor [Homo sapiens] 7: gi|40807038 APOC…	10177.1	86	100	4	2	TAAQNLYEK	77	519.27	1036.53	1036.52	6.3	LTQ-FT	"(gi|178825) (gi|14277770) (gi|28949071) (gi|30582255) (gi|32130518) (gi|40807038)
								TYLPAVDEK	43	518.27	1034.53	1034.53	2.8	LTQ-FT
19	4906	1: gi|619383 apolipoprotein D, apoD [human, plasma, Peptide, 246 aa] 2: gi|671882 apolipoprotein [Homo sapiens] 3: gi|4502149 apolipoprotein A-II preproprotein [Homo sapiens] 4: gi|24987503 Chain A, Structures Of Apolipoprotein A-Ii And A Lipid Surrogate Complex Provide Insights Into Apol	27975.1	76	90	1	1	SPELQAEAK	76	486.75	971.485	971.492	7	LTQ-FT	"(gi|671882) (gi|4502149) (gi|24987503)
19	4906	1: gi|17136078 VGF nerve growth factor inducible precursor [Homo sapiens] 2: gi|20140360 Neurosecretory protein VGF precursor	67217.6	71	100	3	2	GLQEAAEER	51	501.75	1001.49	1001.48	7.6	LTQ-FT	"(gi|20140360)
								QAAAQEER	47	443.21	884.405	884.399	7.5	LTQ-FT	Pyro-glu (N-term Q)
19	4906	1: gi|31615330 Chain A, Human Serum Albumin Mutant R218h Complexed With Thyroxine (3,3',5,5'-Tetraiodo-L-Thyronine	66409.9	69	100	4	3	LVTDLTK	52	395.24	788.465	788.464	1.3	LTQ-FT
								CCTESLVNR	41	569.75	1137.49	1137.49	4.5	LTQ-FT	2 Carbamidomethyl (C)
								YLYEIAR	36	464.25	926.485	926.486	0.7	LTQ-FT
19	4906	1: gi|6808151 hypothetical protein [Homo sapiens] 2: gi|14318638 Brevican [Homo sapiens] 3: gi|14714841 Brevican [Homo sapiens] 4: gi|18605564 Brevican [Homo sapiens] 5: gi|38372935 brevican isoform 1 [Homo sapiens] 6: gi|62088720 brevican isoform 1 variant [Homo sapiens]	36442.4	69	94	2	2	ALHPEEDPEGR	54	625.3	1248.59	1248.57	9.6	LTQ-FT	"(gi|14318638) (gi|14714841) (gi|18605564) (gi|38372935) (gi|62088720)
								ALHPEEDPEGR	45	417.2	1248.58	1248.57	3.7	LTQ-FT
19	4906	1: gi|134464 Secretogranin-2 precursor (Secretogranin II) (SgII) (Chromogranin C) [Contains: Secretoneurin (SN)] 2: gi|18490917 Secretogranin II (chromogranin C) [Homo sapiens] 3: gi|68160947 secretogranin II precursor [Homo sapiens]	70825	58	94	1	1	IESQTQEEVR	58	609.8	1217.59	1217.59	2.7	LTQ-FT	"(gi|18490917) (gi|68160947)
19	4906	1: gi|1439613 neural cell adhesion molecule CD56; N-CAM [Homo sapiens] 2: gi|2213924 neural cell adhesion molecule [Homo sapiens] 3: gi|28703938 Neural cell adhesion molecule 1 [Homo sapiens] 4: gi|62088466 Neural cell adhesion molecule 1, 120 kDa isoform precursor variant [Homo sapiens] 5: gi|94420689 neural cell adhesion molecule 1 isoform 1 [Homo sapiens] 6: gi|115529478 neural cell adhesion m…	93463.7	51	94	1	1	DKDISWFSPNGEK	51	508.24	1521.7	1521.71	7.7	LTQ-FT	"(gi|2213924) (gi|28703938) (gi|62088466) (gi|94420689) (gi|115529478)
20	5014	1: gi|443295 Chain A, Transthyretin (Formerly Prealbumin) 2: gi|2098255 Chain A, Tertiary Structures Of Three Amyloidogenic Transthyretin Variants And Implications For Amy 3: gi|2098257 Chain A, Tertiary Structures Of Three Amyloidogenic Transthyretin Variants And Implications For Amy 4: gi|3891560 Chain A, Tertiary Structures Of Three Amyloidogenic Transthyretin Variants And Implications For Amy…	13752.9	311	100	10	8	RYTIAALLSPYSYSTTAVVTNPKE	81	882.524	2644.55	2644.37	66.677	Q-STAR
								YTIAALLSPYSYSTTAVVTNPK	79	787.476	2359.4	2359.23	73.6159	Q-STAR
								TSESGELHGLTTEEEFVEGIYK	57	819.111	2454.31	2454.14	68.5966	Q-STAR
								YTIAALLSPYSYSTTAVVTNPKE	57	830.497	2488.47	2488.27	79.0833	Q-STAR
								AADDTWEPFASGK	51	697.87	1393.73	1393.61	79.7473	Q-STAR
								TSESGELHGLTTEEEFVEGIYKVEIDTK	47	785.952	3139.78	3139.51	86.7063	Q-STAR
								GSPAINVAVHVFRK	47	498.989	1493.95	1493.85	66.395	Q-STAR
								GSPAINVAVHVFR	41	456.298	1365.87	1365.75	87.2062	Q-STAR	"
															2 Oxidation (M)
21	4884	1: gi|224917 lipoprotein CIII	8746.6	238	1	6	5	DALSSVQESQVAQQAR	89	572.96	1715.86	1715.84	8.3	LTQ-FT
								SEAEDASLLSFMQGYMK	85	646.95	1937.83	1937.84	5.3	LTQ-FT	2 Oxidation (M)
								DALSSVQESQVAQQAR	82	858.93	1715.85	1715.84	0.9	LTQ-FT
								SEAEDASLLSFMQGYMK	52	969.93	1937.85	1937.84	3.5	LTQ-FT	"(gi|28373117) (gi|28373119)
								GWVTDGFSSLKDYWSTVK	48	692.68	2075.02	2075	8.7	LTQ-FT
21	4884	1: gi|414791 contactin [Homo sapiens] 2: gi|28373117 contactin 1 isoform 1 precursor [Homo sapiens] 3: gi|28373119 contactin 1 isoform 2 precursor [Homo sapiens]	113263	99	0.998	2	2	VQVTSQEYSAR	70	634.32	1266.63	1266.62	3.9	LTQ-FT	Pyro-glu (N-term Q)"
								IVESYQIR	57	504.28	1006.55	1006.54	0.7	LTQ-FT
21	4884	1: gi|62898141 prosaposin (variant Gaucher disease and variant metachromatic leukodystrophy) variant [Homo sapiens	58101.9	99	0.999	4	3	QEILAALEK	62	499.28	996.545	996.549	3.6	LTQ-FT
								QEILAALEK	52	507.8	1013.59	1013.58	9.6	LTQ-FT	2 Carbamidomethyl (C)"(gi|28592) (gi|178345) (gi|3212456) (gi|4389275) (gi|4502027) (gi|6013427) (gi|11493459) (gi|23307793) (gi|25058739) (gi|31615330) (gi|31615331) (gi|51476390) (gi|55669910)
								LVGYLDR	45	418.24	834.465	834.46	6.6	LTQ-FT
21	4884	1: gi|17136078 VGF nerve growth factor inducible precursor [Homo sapiens] 2: gi|20140360 Neurosecretory protein VGF precursor	67217.6	74	0.998	2	2	GLQEAAEER	53	501.75	1001.49	1001.48	7.6	LTQ-FT	"(gi|180620) (gi|338057) (gi|338305) (gi|27373753) (gi|32891795) (gi|42716297) (gi|42740907) (gi|57997569)
								LLQQGLAQVEAGRR	51	513.63	1537.87	1537.87	0.4	LTQ-FT
22	3423	1:gi|39654998 Chain A, Hr1b Domain From Prk1 (Homo sapiens)	9054	85	82	1	5	DIPATNLSR	24	514.317	1026.62	1027.53	-886.008	Q-STAR	Acetyl (n-term)
								MIPATNLSR	19	522.324	1042.63	1043.54	871.1	Q-STAR	Acetyl (n-term)
								MIPATNLSR	40	522.821	1043.63	1043.54	80.8	Q-STAR	Acetyl (n-term)
								CIPATNLSR	23	537.328	1072.64	1072.53	100.5	Q-STAR	Acetyl (n-term) Carbamidomethyl '©
								CIPATNLSR	10	537.333	1072.65	1072.53	110.7	Q-STAR	Acetyl (n-term) Carbamidomethyl ©
22	3423	1: gi|32171249 prostaglandin H2 D-isomerase [Homo sapiens] 2: gi|55962670 prostaglandin D2 synthase 21kDa (brain) [Homo sapiens] 3: gi|55962671 prostaglandin D2 synthase 21kDa (brain) [Homo sapiens] 4: gi|55962673 prostaglandin D2 synthase 21kDa (brain) [Homo sapiens]	21015	63	84	2	1	ELDESLQVAER	63	644.862	1287.71	1287.63	61	Q-STAR
22	3423	1: gi|178855 apolipoprotein J precursor 2: gi|180620 complement cytolysis inhibitor precursor 3: gi|338057 sulfated glycoprotein-2 4: gi|338305 'SP40,40' 5: gi|27373753 apolipoprotein J [Homo sapiens] 6: gi|32891795 clusterin (complement lysis inhibitor, SP-40,40, sulfated glycoprotein 2, testosterone-repressed pr 7: gi|42716297 clusterin isoform 1 [Homo sapiens] 8: gi|42740907 clusterin isoform …	48772.1	62	95	1	1	ELDESLQVAER	62	644.862	1287.71	1287.63	61.0058	Q-STAR	"(gi|114593356)
23	3470	gi|17402888 neuronal pentraxin receptor [Homo sapiens]	52813	71	100	2	2	VAQLPLSLK	41.19	484.844	967.607	967.672	-67.9982	Q-STAR
								VAELEHGSSAYSPPDAFK	29.93	635.672	1903.9	1903.99	-51.2607	Q-STAR	Carbamidomethyl (C)
23	3470	1: gi|338284 extracellular-superoxide dismutase (EC 1.15.1.1) 2: gi|114593356 PREDICTED: similar to superoxide dismutase 3, extracellular isoform 3 [Pan troglodytes]	25864.7	54	99	2	2	AGLAASLAGPHSIVGR	54	492.987	1475.94	1475.82	79.5503	Q-STAR
								VTGVVLFR	33	445.811	889.607	889.538	77.2277	Q-STAR
24	4954	1) gi|34616 beta-2 microglobulin [Homo sapiens]	12791	46	89	1	1	SNFLNCYVSGFHPSDIEVDLLK	46	852.133	2553.38	2553.22	61.0601	Q-STAR	Acetyl (N-term)
25	3436	1: gi|32171249 prostaglandin H2 D-isomerase [Homo sapiens] 2: gi|55962670 prostaglandin D2 synthase 21kDa (brain) [Homo sapiens] 3: gi|55962671 prostaglandin D2 synthase 21kDa (brain) [Homo sapiens] 4: gi|55962673 prostaglandin D2 synthase 21kDa (brain) [Homo sapiens]	21015	95	82	1	4	FTAFCK	12	387.246	772.478	772.358	155.368	Q-STAR
								GPGEDFR	16	389.231	776.448	776.345	132.931	Q-STAR	Oxidation (M)
								TMLLQPAGSLGSYSYR	28	880.506	1759	1758.86	77.1522	Q-STAR
								AQGFTEDTIVFLPQTDK	39	955.551	1909.09	1908.95	73.3651	Q-STAR
25	3436	1: gi|178775 proapolipoprotein 2: gi|178777 proapo-A-I protein 3: gi|2914175 Chain A, Crystal Structure Of Human Apolipoprotein A-I 4: gi|4557321 apolipoprotein A-I preproprotein [Homo sapiens]	28944	79			3	TLLDIDNTR	14	530.865	1059.72	1059.56	150.5	Q-STAR
								QGVDADINGLR	18	579.364	1156.71	1156.58	112	Q-STAR
								SGGGGGGLGSGGSIR	47	616.838	1231.67	1231.59	57.7	Q-STAR
25	3436	1) gi|39654998 Chain A, Hr1b Domain From Prk1	9054	77	96	2	2	DIPATNLSR	35	514.33	1026.64	1027.53	-861.581	Q-STAR	Acetyl (N-term)
								MIPATNLSR	31	522.841	1043.67	1043.54	119.305	Q-STAR
26	3714	no data
27	4922	1: go|39654998 Chain A, Hr1b Domain From Prk1	9054	48	79	1	1	MIPATNLSR	41	522.824	1043.63	1043.54	86.4363	Q-STAR
28	3786	1: gi|2072129 chromogranin A	50718	19	80	1	1	RPEDQELESLSAIEAELEK	19	729.418	2185.23	2185.07	71.7138	Q-STAR
29	4076	1: gi|7341255 brain acetylcholinesterase putative membrane anchor [Homo sapiens] 2:gi|7706244 cutA divalent cation tolerance homolog isoform 2 [Homo sapiens] 3:gi|565545579 Chain A, Divalent Cation Tolerant Protein Cuta From Homo Sapiens O60888 4: gi|62198241 cutA divalent cation tolerance homolog isoform 1 [Homo sapiens] 5:gi|62526026 cutA divalent cation tolerance homolog isoform 3 [Homo sapien…	14654	84				TQSSLVPALTDFVR	65	767.42	1532.83	1532.82	3.6534	LTQ-FT
								GKIEEDSEVLMMIK	10	541.28	1620.82	1620.81	4.9358	LTQ-FT
								GKIEEDSEVLMMIK	19	551.94	1652.8	1652.8	-1.08906	LTQ-FT	"
30	4111	1: gi|62089004 chromogranin B precursor variant [Homo sapiens]	81554.9	149	100	3	3	GYPGVQGPEDLEWER	80	866.444	1730.87	1730.79	48.5108	Q-STAR
								ELENLAAMDLELQK	60	808.977	1615.94	1615.81	78.9163	Q-STAR
								SAEFPDFYDSEEPVSTHQEAENEKDR	60	764.891	3055.53	3055.3	77.9224	Q-STAR	"(gi|5834566) (gi|62089004)
31	4167	1: gi|4502807 chromogranin B precursor [Homo sapiens] 2: gi|5834566 chromogranin B (secretogranin 1) [Homo sapiens] 3: gi|62089004 chromogranin B precursor variant [Homo sapiens]	78199.2	85	95	1	1	ELENLAAMDLELQK	85	808.977	1615.94	1615.81	79.0686	Q-STAR	"(gi|38492768) (gi|4504165) (gi|38044288)
32	2652	1: gi|28373309 Chain G, Gelsolin G4-G6ACTIN COMPLEX 2: gi|38492768 Chain A, The Calcium-Activated C-Terminal Half Of Gelsolin 3: gi|4504165 gelsolin isoform a precursor [Homo sapiens] 4: gi|38044288 gelsolin isoform b [Homo sapiens]	36347.2	51	100	5	3	AGALNSNDAFVLK	50	660.384	1318.75	1318.69	49.0814	Q-STAR
								TGAQELLR	43	444.29	886.566	886.487	89.0458	Q-STAR	"
33	1313	1: gi|1621283 hBRAVO/Nr-CAM precursor	143194	348	100	12	12	SLPSEASEQYLTK	93	726.898	1451.78	1451.71	45.6708	Q-STAR	Carbamidomethyl (C)
								SVQLSWTPGDDNNSPITK	67	653.696	1958.07	1957.94	64.8442	Q-STAR
								TLQIIHVSEADSGNYQCIAK	63	749.753	2246.24	2246.1	60.3762	Q-STAR
								LLEDLVQPPTITQQSPK	55	636.387	1906.14	1906.04	50.7964	Q-STAR	Carbamidomethyl (C)
								KIDGDTIIFSNVQER	55	579.006	1733.99	1733.89	57.7405	Q-STAR
								AAPYWITAPQNLVLSPGEDGTLICR	53	914.851	2741.53	2741.38	52.955	Q-STAR
								LSPYVNYSFR	53	623.361	1244.71	1244.62	70.5686	Q-STAR
								YIVSGTPTFVPYLIK	50	849.523	1697.03	1696.94	50.9805	Q-STAR	Carbamidomethyl (C)
								VKHDHTLSLTVLWLK	42	597.385	1789.13	1789.03	59.775	Q-STAR
								DSTGTYTCVAR	31	615.818	1229.62	1229.53	70.3136	Q-STAR	"(gi|4096840) (gi|31542984)
33	1313	1: gi|1483187 inter-alpha-trypsin inhibitor family heavy chain-related protein (IHRP) [Homo sapiens] 2: gi|4096840 inter-alpha-trypsin inhibitor family heavy chain-related protein [Homo sapiens] 3: gi|31542984 inter-alpha (globulin) inhibitor H4 [Homo sapiens]	103321	145	100	7	5	QGPVNLLSDPEQGVEVTGQYER	56	805.78	2414.32	2414.17	61.1862	Q-STAR
								ITFELVYEELLKR	54	551.682	1652.02	1651.92	63.3542	Q-STAR
								GPDVLTATVSGK	53	572.84	1143.66	1143.61	44.8683	Q-STAR
								LGVYELLLK	47	524.356	1046.7	1046.64	58.0038	Q-STAR
								QLGLPGPPDVPDHAAYHPFR	40	546.815	2183.23	2183.09	64.76	Q-STAR	"(gi|6651381) (gi|6651380) (gi|33112413)
33	1313	1: gi|2511666 NrCAM protein [Homo sapiens] 2: gi|6651381 NgCAM-related related cell adhesion molecule /alternative carboxyl terminus [Homo sapiens] 3: gi|6651380 NgCAM-related related cell adhesion molecule [Homo sapiens] 4: gi|33112413 Neuronal cell adhesion molecule precursor (Nr-CAM) (NgCAM-related cell adhesion molecule) (Ng-CAM-r	143283	88	100	4	4	KIDGDTIIFSNVQER	65	579.008	1734	1733.89	62.3239	Q-STAR
								SLPSEASEQYLTK	50	726.933	1451.85	1451.71	93.8484	Q-STAR
								LSPYVNYSFR	35	623.357	1244.7	1244.62	63.9818	Q-STAR
								NEVHLEIK	32	491.295	980.575	980.529	46.9022	Q-STAR	"(gi|68534652)
33	1313	1: gi|51095143 neuronal cell adhesion molecule [Homo sapiens] 2: gi|68534652 NRCAM protein [Homo sapiens]	130938	229	100	9	9	LSPYVNYSFR	69	623.32	1244.63	1244.62	5.23935	LTQ-FT
								SLPSEASEQYLTK	58	726.87	1451.73	1451.71	7.64131	LTQ-FT
								QPEYAVVQR	55	545.29	1088.57	1088.56	3.70305	LTQ-FT
								NALGAIHHTISVR	54	463.6	1387.78	1387.77	7.05089	LTQ-FT	Carbamidomethyl (C)
								GAAVSNNIVVRPSR	53	480.61	1438.81	1438.8	5.41215	LTQ-FT	Carbamidomethyl (C)
								ENIVIQCEAK	46	602.31	1202.61	1202.6	7.45637	LTQ-FT
								DSTGTYTCVAR	45	615.78	1229.55	1229.53	8.79276	LTQ-FT
								LPQSER	42	365.2	728.385	728.382	5.16899	LTQ-FT
								NEVHLEIK	41	491.27	980.525	980.529	-3.67659	LTQ-FT	"(gi|4096840) (gi|31542984)
															Oxidation (M)
33	1313	1: gi|1483187 inter-alpha-trypsin inhibitor family heavy chain-related protein (IHRP) [Homo sapiens] 2: gi|4096840 inter-alpha-trypsin inhibitor family heavy chain-related protein [Homo sapiens] 3: gi|31542984 inter-alpha (globulin) inhibitor H4 [Homo sapiens]	103321	119	100	7	3	LGVYELLLK	53	524.33	1046.65	1046.64	7.56805	LTQ-FT
								ANTVQEATFQMELPK	43	861.93	1721.85	1721.83	9.32555	LTQ-FT
								VQGNDHSATR	43	542.76	1083.51	1083.51	-0.239039	LTQ-FT	Oxidation (M)"(gi|13874433)
33	1313	1: gi|5453766 nel-like 2 [Homo sapiens] 2: gi|13874433 cerebral protein-12 [Homo sapiens]	91284.5	79	100	2	2	IMELQDILAK	59	595.33	1188.65	1188.64	2.5811	LTQ-FT
								ASTATAEQFFQK	45	664.83	1327.65	1327.64	3.50622	LTQ-FT	"(gi|1620909) (gi|4557485)
															Carbamidomethyl (C)
34	1372	1: gi|1942284 Chain , X-Ray Crystal Structure Of Human Ceruloplasmin At 3.0 Angstroms 2: gi|1620909 ceruloplasmin [Homo sapiens] 3: gi|4557485 ceruloplasmin precursor [Homo sapiens]	120009	156	100	9	7	QSEDSTFYLGER	76	716.376	1430.74	1430.63	74.7195	Q-STAR
								EVGPTNADPVCLAK	52	735.927	1469.84	1469.72	82.8308	Q-STAR
								LISVDTEHSNIYLQNGPDR	39	724.421	2170.24	2170.07	80.5593	Q-STAR
								GAYPLSIEPIGVR	38	686.44	1370.87	1370.76	80.3316	Q-STAR	Oxidation (M)
								KAEEEHLGILGPQLHADVGDKVK	34	621.7	2482.77	2482.32	182.495	Q-STAR
								MFTTAPDQVDKEDEDFQESNK	32	830.766	2489.28	2489.05	89.7944	Q-STAR
								QYTDSTFRVPVER	31	533.319	1596.94	1596.79	91.6921	Q-STAR	"(gi|51095143) (gi|1621283) (gi|6651381) (gi|6651380) (gi|33112413)
34	1372	1: gi|31874098 hypothetical protein [Homo sapiens] 2: gi|51095143 neuronal cell adhesion molecule [Homo sapiens] 3: gi|1621283 hBRAVO/Nr-CAM precursor 4: gi|6651381 NgCAM-related related cell adhesion molecule /alternative carboxyl terminus [Homo sapiens] 5: gi|6651380 NgCAM-related related cell adhesion molecule [Homo sapiens] 6: gi|33112413 Neuronal cell adhesion molecule precursor (Nr-CAM) (Ng…	130960	79	100	4	4	SLPSEASEQYLTK	54	726.921	1451.83	1451.71	77.8273	Q-STAR
								KIDGDTIIFSNVQER	42	579.024	1734.05	1733.89	89.1334	Q-STAR
								NALGAIHHTISVR	40	463.633	1387.88	1387.77	78.4101	Q-STAR	"(gi|4096840) (gi|31542984)
34	1372	1: gi|1483187 inter-alpha-trypsin inhibitor family heavy chain-related protein (IHRP) [Homo sapiens] 2: gi|4096840 inter-alpha-trypsin inhibitor family heavy chain-related protein [Homo sapiens] 3: gi|31542984 inter-alpha (globulin) inhibitor H4 [Homo sapiens]	103321	69	100	6	5	LALDNGGLAR	51	500.303	998.592	998.551	40.8953	Q-STAR
								NVVFVIDK	37	467.309	932.604	932.533	76.497	Q-STAR	Oxidation (M)
								LGVYELLLK	34	524.378	1046.74	1046.64	100.196	Q-STAR
								ETLFSVMPGLK	33	619.388	1236.76	1236.64	96.9714	Q-STAR
								GPDVLTATVSGK	33	572.851	1143.69	1143.61	63.887	Q-STAR	"(gi|31874098) (gi|51095143) (gi|1621283) (gi|6651381) (gi|6651380) (gi|33112413)
35	1387	1: gi|68534652 NRCAM protein [Homo sapiens] 2: gi|31874098 hypothetical protein [Homo sapiens] 3: gi|51095143 neuronal cell adhesion molecule [Homo sapiens] 4: gi|1621283 hBRAVO/Nr-CAM precursor 5: gi|6651381 NgCAM-related related cell adhesion molecule /alternative carboxyl terminus [Homo sapiens] 6: gi|6651380 NgCAM-related related cell adhesion molecule [Homo sapiens] 7: gi|33112413 Neuronal c…	85268.3	82	100	5	5	NALGAIHHTISVR	39	463.643	1387.91	1387.77	99.3595	Q-STAR
								LSPYVNYSFR	38	623.353	1244.69	1244.62	58.9988	Q-STAR
								GKPPPSFSWTR	37	630.366	1258.72	1258.65	56.1333	Q-STAR
								KIDGDTIIFSNVQER	34	579.018	1734.03	1733.89	79.8301	Q-STAR	Carbamidomethyl (C)"(gi|1942284) (gi|4557485)
35	1387	1: gi|1620909 ceruloplasmin [Homo sapiens] 2: gi|1942284 Chain , X-Ray Crystal Structure Of Human Ceruloplasmin At 3.0 Angstroms 3: gi|4557485 ceruloplasmin precursor [Homo sapiens]	115398	102	100	4	3	EVGPTNADPVCLAK	58	735.941	1469.87	1469.72	101.57	Q-STAR
								GAYPLSIEPIGVR	51	686.424	1370.83	1370.76	56.2077	Q-STAR
								LISVDTEHSNIYLQNGPDR	43	724.42	2170.24	2170.07	79.1395	Q-STAR
36	4808	1:gi|337760 cerebroside sulfate activator protein 2: gi|337765 cerebroside sulfate activator protein 3:gi|337767 cerebroside sulfate activator protein 4: gi|1565257 cerebroside sulfate activator [Homo sapiens] 5: gi|11386147 prosaposin isoform a preproprotein [Homo sapiens] 6:gi|48145609 PSAP [Homo sapiens] 7:gi|57209714 prosaposin (variant Gaucher disease and variant metachromatic leukodystrophy…	58429	105	100	2		LVGYLDR	36	418.24	834.465	834.46	6.59109	LTQ-FT
								QEILAALEK	62	499.28	996.545	996.549	-3.71281	LTQ-FT
								QEILAALEK	54	507.8	1013.59	1013.58	9.57008	LTQ-FT
								EVTKLIDNNKTEK	8	525.29	1572.85	1572.84	7.88385	LTQ-FT	"(gi|4557485)
37	1319	1: gi|1942284 Chain , X-Ray Crystal Structure Of Human Ceruloplasmin At 3.0 Angstroms 2: gi|4557485 ceruloplasmin precursor [Homo sapiens]	120009	235	100	12	10	DIFTGLIGPMK	57	596.376	1190.74	1190.64	84.8495	Q-STAR
								HYYIGIIETTWDYASDHGEK	55	800.118	2397.33	2397.09	100.368	Q-STAR	Carbamidomethyl (C)
								GVYSSDVFDIFPGTYQTLEMFPR	49	890.505	2668.49	2668.25	90.1204	Q-STAR
								DIASGLIGPLIICK	47	735.462	1468.91	1468.83	52.8631	Q-STAR
								GAYPLSIEPIGVR	44	686.426	1370.84	1370.76	59.2148	Q-STAR	Carbamidomethyl (C)
								LISVDTEHSNIYLQNGPDR	41	724.424	2170.25	2170.07	84.8269	Q-STAR
								DLYSGLIGPLIVCR	41	788.482	1574.95	1574.85	63.6093	Q-STAR	Carbamidomethyl (C)
								KALYLQYTDETFR	41	550.015	1647.02	1646.83	117.857	Q-STAR
								EVGPTNADPVCLAK	36	735.859	1469.7	1469.72	-9.88625	Q-STAR
								KAEEEHLGILGPQLHADVGDKVK	36	621.7	2482.77	2482.32	182.495	Q-STAR	Carbamidomethyl (C)"(gi|51095143)
37	1319	1: gi|68534652 NRCAM protein [Homo sapiens] 2: gi|51095143 neuronal cell adhesion molecule [Homo sapiens]	85268.3	71	100	5	4	AETYEGVYQCTAR	61	774.414	1546.81	1546.67	91.0206	Q-STAR	Carbamidomethyl (C)
								SLPSEASEQYLTK	39	726.92	1451.83	1451.71	76.8574	Q-STAR
								ENIVIQCEAK	31	602.366	1202.72	1202.6	99.9745	Q-STAR	"(gi|6651380) (gi|33112413)
38	1386	1: gi|6651381 NgCAM-related related cell adhesion molecule /alternative carboxyl terminus [Homo sapiens] 2: gi|6651380 NgCAM-related related cell adhesion molecule [Homo sapiens] 3: gi|33112413 Neuronal cell adhesion molecule precursor (Nr-CAM) (NgCAM-related cell adhesion molecule) (Ng-CAM-r	136528	159	100	7	8	LSPYVNYSFR	63	623.3	1244.59	1244.62	26.8	Q-STAR
								LLEDLVQPPTITQQSPK	57	636.337	1905.99	1906.04	27.8	Q-STAR
								ISWLTNGVPIEIAPDDPSR	52	694.007	2079	2079.06	31.5	Q-STAR
								KIDGDTIIFSNVQER	51	578.944	1733.81	1733.89	49.2	Q-STAR
								SVQLSWTPGDDNNSPITK	45	653.635	1957.88	1957.94	28.3	Q-STAR
								VKHDHTLSLTVLWLK	32	448.252	1788.98	1789.03	26.8	Q-STAR	"(gi|553181) (gi|4557287) (gi|15079348) (gi|37790798) (gi|62089124) (gi|62897155)
								ASEPDKNPTAVEGLGSEPDNLVITWKPLNGFESNGPGLQYK	31	1093	4367.98	4368.15	40.7	Q-STAR
38	1386	1: gi|532198 angiotensinogen 2: gi|553181 angiotensinogen 3: gi|4557287 angiotensinogen preproprotein [Homo sapiens] 4: gi|15079348 Angiotensinogen (serpin peptidase inhibitor, clade A, member 8) [Homo sapiens] 5: gi|37790798 angiotensinogen (serine (or cysteine) proteinase inhibitor, clade A (alpha-1 antiproteinase, antitr 6: gi|62089124 angiotensinogen precursor variant [Homo sapiens] 7: gi|628…	53121.5	128	100	3	3	ADSQAQLLLSTVVGVFTAPGLHLK	90	822.438	2464.29	2464.37	31.1	Q-STAR
								AAMVGMLANFLGFR	57	749.359	1496.7	1496.76	39.9	Q-STAR	"(gi|57209758) (gi|67190748) (gi|68533033)
								VLSALQAVQGLLVAQGR	42	574.996	1721.97	1722.02	27.8	Q-STAR
38	1386	1: gi|179674 complement component C4A 2: gi|57209758 complement component 4A (Rodgers blood group) [Homo sapiens] 3: gi|67190748 complement component 4A preproprotein [Homo sapiens] 4: gi|68533033 C4A variant protein [Homo sapiens]	192741	122	100	3	4	ASAGLLGAHAAAITAYALTLTK	77	695.707	2084.1	2084.16	30.7	Q-STAR
								DSSTWLTAFVLK	52	684.343	1366.67	1366.71	30.3	Q-STAR
								TYNVLDMK	40	492.234	982.454	982.479	25.3	Q-STAR	"(gi|50345296)
								STQDTVIALDALSAYWIASHTTEER	35	926.755	2777.24	2777.35	38.6	Q-STAR
38	1386	1: gi|2347136 complement component C4 [Homo sapiens] 2: gi|50345296 complement component 4B preproprotein [Homo sapiens]	192677	109			4	ASAGLLGAHAAAITAYALTLTK	77	695.707	2084.1	2084.16	30.7	Q-STAR
								TYNVLDMK	40	492.234	982.454	982.479	25.3	Q-STAR
								GSSTWLTAFVLK	39	655.341	1308.67	1308.71	30.9	Q-STAR	"(gi|22477205) (gi|28373117) (gi|28373119)
								STQDTVIALDALSAYWIASHTTEER	35	926.755	2777.24	2777.35	38.6	Q-STAR
38	1386	1: gi|414791 contactin [Homo sapiens] 2: gi|22477205 CNTN1 protein [Homo sapiens] 3: gi|28373117 contactin 1 isoform 1 precursor [Homo sapiens] 4: gi|28373119 contactin 1 isoform 2 precursor [Homo sapiens]	113263	84	100	2	2	STEATLSFGYLDPFPPEERPEVR	61	879.736	2636.19	2636.28	34.2	Q-STAR	"(gi|1942284) (gi|4557485)
								WLLNEFPVFITMDK	51	876.925	1751.84	1751.9	34.2	Q-STAR
38	1386	1: gi|1620909 ceruloplasmin [Homo sapiens] 2: gi|1942284 Chain , X-Ray Crystal Structure Of Human Ceruloplasmin At 3.0 Angstroms 3: gi|4557485 ceruloplasmin precursor [Homo sapiens]	115398	48	100	1	2	GAYPLSIEPIGVR	39	686.362	1370.71	1370.76	33.7	Q-STAR
								TTIEKPVWLGFLGPIIK	36	638.028	1911.06	1911.12	32.3	Q-STAR	"(gi|4096840) (gi|31542984)
39	1353	1: gi|1483187 inter-alpha-trypsin inhibitor family heavy chain-related protein (IHRP) [Homo sapiens] 2: gi|4096840 inter-alpha-trypsin inhibitor family heavy chain-related protein [Homo sapiens] 3: gi|31542984 inter-alpha (globulin) inhibitor H4 [Homo sapiens]	103321	368	100	16	16	FSSHVGGTLGQFYQEVLWGSPAASDDGRR	76	781.919	3123.64	3123.48	52.891	Q-STAR
								AEAQAQYSAAVAK	66	654.369	1306.72	1306.65	54.6909	Q-STAR
								QGPVNLLSDPEQGVEVTGQYER	63	805.784	2414.33	2414.17	66.1991	Q-STAR
								NPLVWVHASPEHVVVTR	61	647.4	1939.18	1939.04	69.7597	Q-STAR
								GPDVLTATVSGK	57	572.847	1143.68	1143.61	56.9616	Q-STAR
								QLGLPGPPDVPDHAAYHPFR	55	546.816	2183.24	2183.09	66.2277	Q-STAR
								WKETLFSVMPGLK	53	512.643	1534.91	1534.82	56.4854	Q-STAR
								LGVYELLLK	47	524.358	1046.7	1046.64	61.7969	Q-STAR
								AGFSWIEVTFK	47	642.869	1283.72	1283.65	53.8774	Q-STAR
								SPEQQETVLDGNLIIR	44	604.692	1811.06	1810.94	62.3869	Q-STAR
								NVVFVIDK	43	467.302	932.59	932.533	61.156	Q-STAR
								ITFELVYEELLKR	39	551.69	1652.05	1651.92	78.9488	Q-STAR
								LQDRGPDVLTATVSGK	33	553	1655.98	1655.88	56.1954	Q-STAR	Oxidation (M)
								TGLLLLSDPDKVTIGLLFWDGRGEGLR	33	736.207	2940.8	2940.61	64.6217	Q-STAR	"(gi|4096840) (gi|31542984)
								ETLFSVMPGLK	33	619.378	1236.74	1236.64	79.9641	Q-STAR	Oxidation (M)
39	1353	1: gi|1483187 inter-alpha-trypsin inhibitor family heavy chain-related protein (IHRP) [Homo sapiens] 2: gi|4096840 inter-alpha-trypsin inhibitor family heavy chain-related protein [Homo sapiens] 3: gi|31542984 inter-alpha (globulin) inhibitor H4 [Homo sapiens]	103321	179	100	8	7	LGVYELLLK	62	524.33	1046.65	1046.64	7.56805	LTQ-FT	Oxidation (M)
								NMEQFQVSVSVAPNAK	61	882.94	1763.87	1763.85	8.09706	LTQ-FT
								ANTVQEATFQMELPK	52	861.93	1721.85	1721.83	9.32555	LTQ-FT
								VQGNDHSATR	50	542.76	1083.51	1083.51	-0.239039	LTQ-FT
								ILDDLSPR	40	464.76	927.505	927.503	3.14285	LTQ-FT	"(gi|33315782) (gi|40788983) (gi|57242755) (gi|57242757)
								LQDRGPDVLTATVSGK	35	552.97	1655.89	1655.88	2.39811	LTQ-FT	Oxidation (M)
39	1353	1: gi|21706696 Calsyntenin 1 [Homo sapiens] 2: gi|33315782 non-classical cadherin XB31alpha1 [Homo sapiens] 3: gi|40788983 KIAA0911 protein [Homo sapiens] 4: gi|57242755 calsyntenin 1 isoform 2 [Homo sapiens] 5: gi|57242757 calsyntenin 1 isoform 1 [Homo sapiens]	108601	196	100	13	10	ATEDVLVK	59	437.75	873.485	873.481	5.42084	LTQ-FT
								EPFTISVWMR	46	641.32	1280.63	1280.62	2.44725	LTQ-FT	2 Carbamidomethyl (C)
								RATEDVLVK	46	515.8	1029.59	1029.58	3.5257	LTQ-FT
								VIDCLYTCK	45	586.28	1170.55	1170.54	3.53853	LTQ-FT
								IHGQNVPFDAVVVDK	44	546.63	1636.87	1636.86	6.67926	LTQ-FT
								LIFLFR	44	404.76	807.505	807.501	5.93436	LTQ-FT
								GPDGTNVK	44	394.2	786.385	786.387	-2.15924	LTQ-FT	Oxidation (M)
								YISNEFK	37	450.73	899.445	899.439	7.34347	LTQ-FT
								AMQHISYLNSR	34	668.33	1334.65	1334.64	4.01382	LTQ-FT	"(gi|2511666) (gi|6651380) (gi|6651381) (gi|31874098) (gi|33112413) (gi|40788219) (gi|51095143) (gi|68534652)
								STGEGVIR	33	409.72	817.425	817.429	-4.7576	LTQ-FT
39	1353	1: gi|1621283 hBRAVO/Nr-CAM precursor 2: gi|2511666 NrCAM protein [Homo sapiens] 3: gi|6651380 NgCAM-related related cell adhesion molecule [Homo sapiens] 4: gi|6651381 NgCAM-related related cell adhesion molecule /alternative carboxyl terminus [Homo sapiens] 5: gi|31874098 hypothetical protein [Homo sapiens] 6: gi|33112413 Neuronal cell adhesion molecule precursor (Nr-CAM) (NgCAM-related cell ad…	143194	109	100	3	2	SLPSEASEQYLTK	84	726.87	1451.73	1451.71	7.64131	LTQ-FT	"(gi|28373117) (gi|28373119)
								NALGAIHHTISVR	51	463.6	1387.78	1387.77	7.05089	LTQ-FT
40	1329	1: gi|414791 contactin [Homo sapiens] 2: gi|28373117 contactin 1 isoform 1 precursor [Homo sapiens] 3: gi|28373119 contactin 1 isoform 2 precursor [Homo sapiens]	113263	92	100	3	3	TTKPYPADIVVQFK	49	536.328	1605.96	1605.88	52.91	LTQ-FT
								VQVTSQEYSAR	48	634.356	1266.7	1266.62	60.5454	Q-STAR
								STEATLSFGYLDPFPPEERPEVR	46	879.806	2636.4	2636.28	45.6238	Q-STAR	"(gi|30089937)
40	1329	1: gi|30089935 transmembrane protein 132A isoform a [Homo sapiens] 2: gi|30089937 transmembrane protein 132A isoform b [Homo sapiens]	110128	52	100	2	2	LTHLLGPDWLLDVSHLVAPHAR	40	615.884	2459.51	2459.34	66.1575	Q-STAR
								LTVWAPLLPLR	35	639.938	1277.86	1277.79	59.6907	Q-STAR	"(gi|31874098) (gi|51095143) (gi|6651381) (gi|2511666) (gi|6651380) (gi|33112413)
40	1329	1: gi|68534652 NRCAM protein [Homo sapiens] 2: gi|31874098 hypothetical protein [Homo sapiens] 3: gi|51095143 neuronal cell adhesion molecule [Homo sapiens] 4: gi|6651381 NgCAM-related related cell adhesion molecule /alternative carboxyl terminus [Homo sapiens] 5: gi|2511666 NrCAM protein [Homo sapiens] 6: gi|6651380 NgCAM-related related cell adhesion molecule [Homo sapiens] 7: gi|33112413 Neuro…	85268.3	54	99	2	2	SLPSEASEQYLTK	45	726.941	1451.87	1451.71	106.126	Q-STAR
								LSPYVNYSFR	36	623.387	1244.76	1244.62	113.223	Q-STAR	Oxidation (M)"(gi|13874433)
40	1329	1: gi|5453766 nel-like 2 [Homo sapiens] 2: gi|13874433 cerebral protein-12 [Homo sapiens]	91284.5	53	99	2	2	IMELQDILAK	48	595.383	1188.75	1188.64	92.4248	Q-STAR
								AFLFQDTPR	34	547.85	1093.68	1093.56	118.125	Q-STAR	"(gi|6651380) (gi|6651381) (gi|31874098) (gi|33112413) (gi|51095143) (gi|68534652)
40	1329	1: gi|2511666 NrCAM protein [Homo sapiens] 2: gi|6651380 NgCAM-related related cell adhesion molecule [Homo sapiens] 3: gi|6651381 NgCAM-related related cell adhesion molecule /alternative carboxyl terminus [Homo sapiens] 4: gi|31874098 hypothetical protein [Homo sapiens] 5: gi|33112413 Neuronal cell adhesion molecule precursor (Nr-CAM) (NgCAM-related cell adhesion molecule) (Ng-CAM-r 6: gi|51095…	143283	222	100	9	9	GAAVSNNIVVRPSR	56	480.61	1438.81	1438.8	5.41215	LTQ-FT
								QPEYAVVQR	55	545.29	1088.57	1088.56	3.70305	LTQ-FT
								SLPSEASEQYLTK	55	726.87	1451.73	1451.71	7.64131	LTQ-FT
								NALGAIHHTISVR	54	463.6	1387.78	1387.77	7.05089	LTQ-FT
								LSPYVNYSFR	53	623.32	1244.63	1244.62	5.23935	LTQ-FT	Carbamidomethyl (C)
								NEVHLEIK	46	491.276	980.537	980.529	7.8682	LTQ-FT	Carbamidomethyl (C)
								DSTGTYTCVAR	45	615.78	1229.55	1229.53	8.79276	LTQ-FT
								ENIVIQCEAK	43	602.31	1202.61	1202.6	7.45637	LTQ-FT
								LPQSER	39	365.2	728.385	728.382	5.16899	LTQ-FT	"(gi|28373117) (gi|28373119)
40	1329	1: gi|414791 contactin [Homo sapiens] 2: gi|28373117 contactin 1 isoform 1 precursor [Homo sapiens] 3: gi|28373119 contactin 1 isoform 2 precursor [Homo sapiens]	113263	152	100	6	4	IVESYQIR	74	504.28	1006.55	1006.54	0.735188	LTQ-FT
								IKTDGAAPNVAPSDVGGGGGR	50	632.66	1894.96	1894.95	4.5236	LTQ-FT	2 Oxidation (M)
								VTVTNPDTGR	50	530.28	1058.55	1058.54	9.29019	LTQ-FT
								ILALAPTFEMNPMK	44	804.42	1606.83	1606.81	9.71055	LTQ-FT	Oxidation (M)"(gi|13874433)
40	1329	1: gi|5453766 nel-like 2 [Homo sapiens] 2: gi|13874433 cerebral protein-12 [Homo sapiens]	91284.5	128	100	3	3	IMELQDILAK	63	595.33	1188.65	1188.64	2.5811	LTQ-FT
								ASTATAEQFFQK	62	664.83	1327.65	1327.64	3.50622	LTQ-FT
								AFLFQDTPR	55	547.79	1093.57	1093.56	8.98903	LTQ-FT	"(gi|4096840) (gi|31542984)
40	1329	1: gi|1483187 inter-alpha-trypsin inhibitor family heavy chain-related protein (IHRP) [Homo sapiens] 2: gi|4096840 inter-alpha-trypsin inhibitor family heavy chain-related protein [Homo sapiens] 3: gi|31542984 inter-alpha (globulin) inhibitor H4 [Homo sapiens]	103321	69	99	2	1	LGVYELLLK	69	524.33	1046.65	1046.64	7.56805	LTQ-FT	Carbamidomethyl (C)"(gi|6651381) (gi|6651380) (gi|33112413)
40	1329	1: gi|1621283 hBRAVO/Nr-CAM precursor 2: gi|6651381 NgCAM-related related cell adhesion molecule /alternative carboxyl terminus [Homo sapiens] 3: gi|6651380 NgCAM-related related cell adhesion molecule [Homo sapiens] 4: gi|33112413 Neuronal cell adhesion molecule precursor (Nr-CAM) (NgCAM-related cell adhesion molecule) (Ng-CAM-r	143194	223	100	8	7	TLQIIHVSEADSGNYQCIAK	70	749.757	2246.25	2246.1	66.9623	Q-STAR
								SLPSEASEQYLTK	69	726.9	1451.79	1451.71	49.6165	Q-STAR
								KIDGDTIIFSNVQER	63	579.005	1733.99	1733.89	57.4896	Q-STAR	Carbamidomethyl (C)
								SVQLSWTPGDDNNSPITK	48	653.697	1958.07	1957.94	66.237	Q-STAR
								AAPYWITAPQNLVLSPGEDGTLICR	46	914.849	2741.53	2741.38	51.5148	Q-STAR
								YIVSGTPTFVPYLIK	42	849.518	1697.02	1696.94	45.79	Q-STAR
								LLEDLVQPPTITQQSPK	39	636.391	1906.15	1906.04	57.5155	Q-STAR	"(gi|553181) (gi|4557287) (gi|15079348) (gi|37790798) (gi|62089124) (gi|62897155)
41	2456	1: gi|532198 angiotensinogen 2: gi|553181 angiotensinogen 3: gi|4557287 angiotensinogen preproprotein [Homo sapiens] 4: gi|15079348 Angiotensinogen (serpin peptidase inhibitor, clade A, member 8) [Homo sapiens] 5: gi|37790798 angiotensinogen (serine (or cysteine) proteinase inhibitor, clade A (alpha-1 antiproteinase, antitr 6: gi|62089124 angiotensinogen precursor variant [Homo sapiens] 7: gi|628…	53121.5	310	100	10	10	AAMVGMLANFLGFR	88	749.43	1496.85	1496.76	54.8657	Q-STAR	Pyro-glu (N-term Q)
								SLDFTELDVAAEK	75	719.392	1436.77	1436.7	46.1675	Q-STAR
								QPFVQGLALYTPVVLPR	70	941.088	1880.16	1880.06	55.6781	Q-STAR
								ALQDQLVLVAAK	67	634.917	1267.82	1267.75	55.3508	Q-STAR
								ADSQAQLLLSTVVGVFTAPGLHLK	65	822.512	2464.52	2464.37	59.5434	Q-STAR
								FMQAVTGWK	53	534.303	1066.59	1066.53	59.8457	Q-STAR
								DPTFIPAPIQAK	53	649.398	1296.78	1296.71	57.2558	Q-STAR
								QPFVQGLALYTPVVLPR	51	633.406	1897.2	1897.08	60.1086	Q-STAR
								LDTEDKLR	40	495.293	988.572	988.519	53.4841	Q-STAR
								LQAILGVPWK	37	562.874	1123.73	1123.68	50.9355	Q-STAR	"
41	2456	1: gi|5802984 UDP-GlcNAc:betaGal beta-1,3-N-acetylglucosaminyltransferase 1 [Homo sapiens]	47088.9	93	99	2	2	TALASGGVLDASGDYR	82	776.89	1551.77	1551.75	8.12629	LTQ-FT
								VPTFDER	36	432.22	862.425	862.418	8.10627	LTQ-FT	"
															Oxidation (M)
42	2550	1: gi|20178323 Pigment epithelium-derived factor precursor (PEDF) (Serpin-F1) (EPC-1)	46313.3	356	100	11	12	LAAAVSNFGYDLYR	105	780.447	1558.88	1558.78	65.3871	Q-STAR
								SSMSPTTNVLLSPLSVATALSALSLGAEQR	85	1006.62	3016.83	3016.57	84.9636	Q-STAR
								ELLDTVTAPQK	77	607.873	1213.73	1213.66	61.8545	Q-STAR
								DTDTGALLFIGK	72	625.878	1249.74	1249.66	68.4573	Q-STAR
								EIPDEISILLLGVAHFK	62	632.075	1893.2	1893.06	74.5739	Q-STAR
								SSFVAPLEK	62	489.304	976.593	976.523	71.5836	Q-STAR
								TVQAVLTVPK	52	528.368	1054.72	1054.64	78.6459	Q-STAR
								TVQAVLTVPK	51	528.36	1054.71	1054.64	64.1405	Q-STAR	Oxidation (M)
								ALYYDLISSPDIHGTYK	46	652.708	1955.1	1954.97	69.3239	Q-STAR
								IAQLPLTGSMSIIFFLPLK	40	702.465	2104.37	2104.2	81.3525	Q-STAR
								KTSLEDFYLDEER	35	548.973	1643.9	1643.77	78.4752	Q-STAR
								SSFVAPLEK	33	489.304	976.594	976.523	72.5953	Q-STAR	"(gi|4557417)
42	2550	1: gi|3983127 monocyte antigen CD14 precursor [Homo sapiens] 2: gi|4557417 CD14 antigen precursor [Homo sapiens]	40064.8	99	100	4	4	LTVGAAQVPAQLLVGALR	67	593.069	1776.19	1776.06	69.9317	Q-STAR
								AFPALTSLDLSDNPGLGER	60	658.383	1972.13	1971.99	69.012	Q-STAR	Carbamidomethyl (C)
								SWLAELQQWLKPGLK	45	599.728	1796.16	1796	90.847	Q-STAR
								VLSIAQAHSPAFSCEQVR	36	667.395	1999.16	1998.99	84.8056	Q-STAR	"(gi|21686977)
42	2550	1: gi|3451335 F22162_1 [Homo sapiens] 2: gi|21686977 immunoglobulin superfamily, member 4C [Homo sapiens]	41761.2	55	99	2	2	FQLEEFSPR	59	576.833	1151.65	1151.56	78.0896	Q-STAR	"
43	2125	1: gi|21071039 carnosinase 1 [Homo sapiens]	56656.1	792	100	23	24	EWVAIESDSVQPVPR	109	856.484	1710.95	1710.86	56.3501	Q-STAR
								FIIEGMEEAGSVALEELVEKEKDR	94	681.139	2720.53	2720.36	62.4451	Q-STAR	Oxidation (M)
								SVVLIPLGAVDDGEHSQNEK	85	703.069	2106.18	2106.06	59.5012	Q-STAR
								FIIEGMEEAGSVALEELVEKEKDR	73	685.141	2736.54	2736.35	67.1324	Q-STAR
								YPSLSIHGIEGAFDEPGTK	72	673.381	2017.12	2016.98	71.0225	Q-STAR
								GPVLAWINAVSAFR	71	750.959	1499.9	1499.82	53.0795	Q-STAR
								FIIEGMEEAGSVALEELVEK	65	731.753	2192.24	2192.09	65.5064	Q-STAR	Carbamidomethyl (C)
								GDGWLTDPYVLTEVDGK	64	932.996	1863.98	1863.89	47.0232	Q-STAR
								GTVCFYGHLDVQPADR	64	612.335	1833.98	1833.85	73.8022	Q-STAR
								VFQYIDLHQDEFVQTLK	62	708.409	2122.2	2122.07	61.839	Q-STAR
								ALEQDLPVNIK	61	620.383	1238.75	1238.69	51.2882	Q-STAR	Oxidation (M)
								GATDNKGPVLAWINAVSAFR	60	696.413	2086.22	2086.1	57.8598	Q-STAR
								FLFDTKEEILMHLWR	58	665.382	1993.12	1993.01	56.0117	Q-STAR
								MMAVAADTLQR	58	603.835	1205.66	1205.59	54.9142	Q-STAR
								FLFDTKEEILMHLWR	53	495.293	1977.14	1977.02	62.1117	Q-STAR	Oxidation (M)
								GNSYFMVEVK	52	587.317	1172.62	1172.55	56.7479	Q-STAR
								GNSYFMVEVK	52	595.318	1188.62	1188.55	61.1292	Q-STAR	Oxidation (M)
								LFAAFFLEMAQLH	52	769.441	1536.87	1536.78	56.8526	Q-STAR
								LFAAFFLEMAQLH	48	777.437	1552.86	1552.77	54.2906	Q-STAR
								KPAITYGTR	40	503.811	1005.61	1005.56	45.9773	Q-STAR
								TVFGTEPDMIR	38	633.354	1264.69	1264.61	64.4332	Q-STAR	Oxidation (M)
								FLFDTK	35	385.729	769.444	769.401	55.8928	Q-STAR
								TVFGTEPDMIR	33	641.344	1280.67	1280.61	52.2455	Q-STAR
								VASVDMGPQQLPDGQSLPIPPVILAELGSDPTK	31	1123.99	3368.94	3368.75	54.9209	Q-STAR	"(gi|553181) (gi|4557287) (gi|15079348) (gi|37790798) (gi|62089124) (gi|62897155)
43	2125	1: gi|532198 angiotensinogen 2: gi|553181 angiotensinogen 3: gi|4557287 angiotensinogen preproprotein [Homo sapiens] 4: gi|15079348 Angiotensinogen (serpin peptidase inhibitor, clade A, member 8) [Homo sapiens] 5: gi|37790798 angiotensinogen (serine (or cysteine) proteinase inhibitor, clade A (alpha-1 antiproteinase, antitr 6: gi|62089124 angiotensinogen precursor variant [Homo sapiens] 7: gi|628…	53121.5	316	100	11	12	SLDFTELDVAAEK	80	719.398	1436.78	1436.7	54.5144	Q-STAR
								VLSALQAVQGLLVAQGR	77	575.047	1722.12	1722.02	60.2724	Q-STAR
								SLDFTELDVAAEKIDR	70	608.014	1821.02	1820.92	57.677	Q-STAR
								AAMVGMLANFLGFR	68	749.431	1496.85	1496.76	55.9414	Q-STAR
								FMQAVTGWK	58	534.305	1066.6	1066.53	64.4456	Q-STAR	2 Oxidation (M)
								DPTFIPAPIQAK	57	649.402	1296.79	1296.71	62.7219	Q-STAR
								AAMVGMLANFLGFR	54	765.419	1528.82	1528.75	45.6045	Q-STAR
								LQAILGVPWK	49	562.883	1123.75	1123.68	67.1377	Q-STAR
								ADSQAQLLLSTVVGVFTAPGLHLK	48	822.519	2464.53	2464.37	67.1105	Q-STAR
								QPFVQGLALYTPVVLPR	38	633.418	1897.23	1897.08	78.5063	Q-STAR
								ALQDQLVLVAAK	37	634.914	1267.81	1267.75	50.7127	Q-STAR
								LDTEDKLR	31	495.297	988.58	988.519	62.0342	Q-STAR	"(gi|37748641) (gi|62898910)
43	2125	1: gi|4504893 kininogen 1 [Homo sapiens] 2: gi|37748641 Kininogen 1 [Homo sapiens] 3: gi|62898910 kininogen 1 variant [Homo sapiens]	47852.7	157	100	6	7	DIPTNSPELEETLTHTITK	72	713.742	2138.2	2138.07	60.5442	Q-STAR
								IGEIKEETTSHLR	53	504.966	1511.88	1511.79	53.9591	Q-STAR
								KYFIDFVAR	51	579.846	1157.68	1157.62	47.2364	Q-STAR
								YFIDFVAR	43	515.799	1029.58	1029.53	53.1952	Q-STAR
								QVVAGLNFR	41	502.315	1002.61	1002.56	53.8192	Q-STAR
								TVGSDTFYSFK	37	626.337	1250.66	1250.58	61.8552	Q-STAR
								RPPGFSPFR	31	530.816	1059.62	1059.56	52.8936	Q-STAR	"(gi|37748641) (gi|62898910)
43	2125	1: gi|4504893 kininogen 1 [Homo sapiens] 2: gi|37748641 Kininogen 1 [Homo sapiens] 3: gi|62898910 kininogen 1 variant [Homo sapiens]	47852.7	202	100	7	7	IGEIKEETTSHLR	86	504.94	1511.8	1511.79	2.54334	LTQ-FT
								TVGSDTFYSFK	59	626.3	1250.59	1250.58	2.85387	LTQ-FT
								YFIDFVAR	55	515.771	1029.53	1029.53	0.104902	LTQ-FT	Carbamidomethyl (C)
								QVVAGLNFR	49	502.29	1002.57	1002.56	4.43165	LTQ-FT
								EGDCPVQSGK	39	538.74	1075.47	1075.46	4.70496	LTQ-FT
								VQVVAGKK	35	414.77	827.525	827.523	3.16728	LTQ-FT
								RPPGFSPFR	34	530.79	1059.57	1059.56	3.86198	LTQ-FT	2 Oxidation (M)"
43	2125	1: gi|21071039 carnosinase 1 [Homo sapiens]	56656.1	184	100	9	7	MMAVAADTLQR	64	619.8	1237.59	1237.58	4.83201	LTQ-FT
								AIHLDLEEYR	58	629.83	1257.65	1257.64	8.05718	LTQ-FT
								HLEDVFSK	47	487.75	973.485	973.487	-1.45251	LTQ-FT
								HLEDVFSKR	44	377.54	1129.6	1129.59	9.03427	LTQ-FT
								KPAITYGTR	38	503.79	1005.57	1005.56	4.72274	LTQ-FT	"(gi|16555792)
43	2125	1: gi|21071039 carnosinase 1 [Homo sapiens] 2: gi|16555792 glutamate carboxypeptidase-like protein 2 [Homo sapiens]	56656.1	138	100	6	6	SVVLIPLGAVDDGEHSQNEK	61	703.068	2106.18	2106.06	58.6123	Q-STAR
								EWVAIESDSVQPVPR	50	856.489	1710.96	1710.86	62.2431	Q-STAR
								AIHLDLEEYR	49	629.862	1257.71	1257.64	58.156	Q-STAR
								ALEQDLPVNIK	41	620.39	1238.76	1238.69	62.5194	Q-STAR
								YPSLSIHGIEGAFDEPGTK	40	673.384	2017.13	2016.98	75.3865	Q-STAR
								VFQYIDLHQDEFVQTLK	39	708.422	2122.25	2122.07	81.0443	Q-STAR	Oxidation (M)"(gi|36575) (gi|13477169) (gi|88853069)
43	2125	1: gi|36573 unnamed protein product [Homo sapiens] 2: gi|36575 unnamed protein product [Homo sapiens] 3: gi|13477169 Vitronectin [Homo sapiens] 4: gi|88853069 vitronectin precursor [Homo sapiens]	54308.1	88	100	4	4	DWHGVPGQVDAAMAGR	72	561.6	1681.78	1681.76	9.00305	LTQ-FT
								DVWGIEGPIDAAFTR	36	823.92	1645.83	1645.81	9.40631	LTQ-FT
								TSAGTRQPQFISR	36	483.59	1447.75	1447.75	-3.4336	LTQ-FT
								QPQFISR	33	438.24	874.465	874.466	-0.722727	LTQ-FT	"(gi|15778922) (gi|19557645)
43	2125	1: gi|5531817 secretogranin III [Homo sapiens] 2: gi|15778922 Secretogranin III [Homo sapiens] 3: gi|19557645 secretogranin III [Homo sapiens]	53047.9	136	100	4	4	LLNLGLITESQAHTLEDEVAEVLQK	58	921.886	2762.64	2762.47	60.3054	Q-STAR
								SSPLDNKLNVEDVDSTK	55	621.012	1860.01	1859.91	55.2188	Q-STAR
								FQDDPDGLHQLDGTPLTAEDIVHK	54	666.118	2660.44	2660.27	65.0528	Q-STAR
								TLIDFVK	45	418.275	834.536	834.485	60.6254	Q-STAR	"(gi|177809) (gi|177933) (gi|443345) (gi|1340142) (gi|2982038) (gi|2982150) (gi|2982165) (gi|4165890) (gi|6980544) (gi|15341985) (gi|21961493) (gi|50659080)
43	2125	1: gi|28332 unnamed protein product [Homo sapiens] 2: gi|177809 alpha-1-antichymotrypsin 3: gi|177933 alpha-1-antichymotrypsin precursor 4: gi|443345 Chain A, Alpha1 Antichymotrypsin 5: gi|1340142 alpha1-antichymotrypsin [Homo sapiens] 6: gi|2982038 Chain A, Cleaved Antichymotrypsin A349r 7: gi|2982150 Chain A, Cleaved Antichymotrypsin A347r 8: gi|2982165 Chain A, Cleaved Antichymotrypsin T345r 9…	25160	91	100	2	2	ADLSGITGAR	74	480.76	959.505	959.504	1.95622	LTQ-FT
								NLAVSQVVHK	44	547.82	1093.63	1093.62	1.00949	LTQ-FT	"(gi|553181) (gi|4557287) (gi|15079348) (gi|37790798) (gi|62089124) (gi|62897155)
43	2125	1: gi|532198 angiotensinogen 2: gi|553181 angiotensinogen 3: gi|4557287 angiotensinogen preproprotein [Homo sapiens] 4: gi|15079348 Angiotensinogen (serpin peptidase inhibitor, clade A, member 8) [Homo sapiens] 5: gi|37790798 angiotensinogen (serine (or cysteine) proteinase inhibitor, clade A (alpha-1 antiproteinase, antitr 6: gi|62089124 angiotensinogen precursor variant [Homo sapiens] 7: gi|628…	53121.5	53	99	2	2	ALQDQLVLVAAK	46	634.922	1267.83	1267.75	62.2749	Q-STAR
								SLDFTELDVAAEK	31	719.399	1436.78	1436.7	56.1111	Q-STAR	Oxidation (M)"(gi|9665262) (gi|62088004) (gi|62822120)
43	2125	1: gi|7512417 extracellular protein - human 2: gi|9665262 EGF-containing fibulin-like extracellular matrix protein 1 precursor [Homo sapiens] 3: gi|62088004 EGF-containing fibulin-like extracellular matrix protein 1 isoform b variant [Homo sapiens] 4: gi|62822120 unknown [Homo sapiens]	43108.8	58	100	6	1	EHIVDLEMLTVSSIGTFR	59	688.38	2062.12	2062.04	37.9081	Q-STAR	"(gi|36573) (gi|13477169) (gi|88853069)
43	2125	1: gi|36575 unnamed protein product [Homo sapiens] 2: gi|36573 unnamed protein product [Homo sapiens] 3: gi|13477169 Vitronectin [Homo sapiens] 4: gi|88853069 vitronectin precursor [Homo sapiens]	54367.2	63	98	2	1	FEDGVLDPDYPR	64	711.891	1421.77	1421.65	84.9571	Q-STAR	"
44	2131	1: gi|21071039 carnosinase 1 [Homo sapiens]	56656.1	282	100	14	13	SVVLIPLGAVDDGEHSQNEK	71	703.082	2106.22	2106.06	77.8952	Q-STAR
								EWVAIESDSVQPVPR	66	856.478	1710.94	1710.86	49.1607	Q-STAR
								ALEQDLPVNIK	65	620.39	1238.77	1238.69	63.5463	Q-STAR
								MMAVAADTLQR	58	603.849	1205.68	1205.59	77.7512	Q-STAR
								GDGWLTDPYVLTEVDGK	48	933.008	1864	1863.89	60.0647	Q-STAR
								FIIEGMEEAGSVALEELVEK	47	731.763	2192.27	2192.09	79.5902	Q-STAR	Oxidation (M)
								TVFGTEPDMIR	38	633.341	1264.67	1264.61	44.2547	Q-STAR
								GNSYFMVEVK	34	595.312	1188.61	1188.55	51.5982	Q-STAR
								GNSYFMVEVK	33	587.316	1172.62	1172.55	53.6862	Q-STAR
								HLEDVFSKR	33	377.573	1129.7	1129.59	96.0952	Q-STAR
								FLFDTK	31	385.738	769.461	769.401	77.4031	Q-STAR	"
44	2131	1: gi|21071039 carnosinase 1 [Homo sapiens]	56656.1	193	100	10	7	HLEDVFSK	56	487.75	973.485	973.487	-1.45251	LTQ-FT	2 Oxidation (M)
								AIHLDLEEYR	56	629.83	1257.65	1257.64	8.05718	LTQ-FT
								MMAVAADTLQR	54	619.8	1237.59	1237.58	4.83201	LTQ-FT
								YPSLSIHGIEGAFDEPGTK	47	673.34	2017	2016.98	9.40515	LTQ-FT
								HLEDVFSKR	41	377.54	1129.6	1129.59	9.03427	LTQ-FT
								WNYIEGTK	35	505.75	1009.49	1009.49	-1.40071	LTQ-FT	"(gi|37748641) (gi|62898910)
44	2131	1: gi|4504893 kininogen 1 [Homo sapiens] 2: gi|37748641 Kininogen 1 [Homo sapiens] 3: gi|62898910 kininogen 1 variant [Homo sapiens]	47852.7	122	100	6	5	YNSQNQSNNQFVLYR	50	625.69	1874.05	1873.87	94.7728	Q-STAR
								DIPTNSPELEETLTHTITK	47	713.756	2138.25	2138.07	80.2442	Q-STAR	Carbamidomethyl (C)
								TVGSDTFYSFK	43	626.342	1250.67	1250.58	70.52	Q-STAR
								ENFLFLTPDCK	37	692.372	1382.73	1382.65	53.9578	Q-STAR
								QVVAGLNFR	37	502.313	1002.61	1002.56	50.2982	Q-STAR	"(gi|37748641) (gi|62898910)
44	2131	1: gi|4504893 kininogen 1 [Homo sapiens] 2: gi|37748641 Kininogen 1 [Homo sapiens] 3: gi|62898910 kininogen 1 variant [Homo sapiens]	47852.7	157	100	7	5	IGEIKEETTSHLR	92	504.94	1511.8	1511.79	2.54334	LTQ-FT
								TVGSDTFYSFK	51	626.3	1250.59	1250.58	2.85387	LTQ-FT
								QVVAGLNFR	51	502.29	1002.57	1002.56	4.43165	LTQ-FT
								VQVVAGKK	35	414.77	827.525	827.523	3.16728	LTQ-FT
								RPPGFSPFR	32	530.79	1059.57	1059.56	3.86198	LTQ-FT	"(gi|37748641) (gi|62898910) (gi|124056474)
44	2131	1: gi|532198 angiotensinogen 2: gi|553181 angiotensinogen 3: gi|4557287 angiotensinogen preproprotein [Homo sapiens] 4: gi|15079348 Angiotensinogen (serpin peptidase inhibitor, clade A, member 8) [Homo sapiens] 5: gi|37790798 angiotensinogen (serine (or cysteine) proteinase inhibitor, clade A (alpha-1 antiproteinase, antitr 6: gi|62089124 angiotensinogen precursor variant [Homo sapiens] 7: gi|628…	53121.5	104	100	4	4	ALQDQLVLVAAK	68	634.918	1267.82	1267.75	55.8667	Q-STAR
								SLDFTELDVAAEK	50	719.407	1436.8	1436.7	67.4092	Q-STAR
								ADSQAQLLLSTVVGVFTAPGLHLK	45	822.527	2464.56	2464.37	77.7428	Q-STAR	"(gi|13477169) (gi|88853069)
															Oxidation (M)
44	2131	1: gi|36573 unnamed protein product [Homo sapiens] 2: gi|13477169 Vitronectin [Homo sapiens] 3: gi|88853069 vitronectin precursor [Homo sapiens]	54308.1	104	100	4	3	DVWGIEGPIDAAFTR	69	823.92	1645.83	1645.81	9.40631	LTQ-FT
								DWHGVPGQVDAAMAGR	66	561.6	1681.78	1681.76	9.00305	LTQ-FT
								QPQFISR	34	438.24	874.465	874.466	-0.722727	LTQ-FT	"(gi|553181) (gi|4557287)
44	2131	1: gi|28332 unnamed protein product [Homo sapiens] 2: gi|177809 alpha-1-antichymotrypsin 3: gi|177933 alpha-1-antichymotrypsin precursor 4: gi|443345 Chain A, Alpha1 Antichymotrypsin 5: gi|1340142 alpha1-antichymotrypsin [Homo sapiens] 6: gi|2982038 Chain A, Cleaved Antichymotrypsin A349r 7: gi|2982150 Chain A, Cleaved Antichymotrypsin A347r 8: gi|2982165 Chain A, Cleaved Antichymotrypsin T345r 9…	25160	90	100	2	2	NLAVSQVVHK	61	547.82	1093.63	1093.62	1.00949	LTQ-FT
								ADLSGITGAR	58	480.76	959.505	959.504	1.95622	LTQ-FT	"
45	2152	1: gi|21071039 carnosinase 1 [Homo sapiens]	56656.1	277	100	17	17	MMAVAADTLQR	64	603.814	1205.61	1205.59	19.4544	Q-STAR
								SVVLIPLGAVDDGEHSQNEK	62	703.096	2106.27	2106.06	98.8149	Q-STAR
								GPVLAWINAVSAFR	62	750.992	1499.97	1499.82	96.6833	Q-STAR	Carbamidomethyl (C)
								YPSLSIHGIEGAFDEPGTK	59	673.416	2017.23	2016.98	122.312	Q-STAR
								GTVCFYGHLDVQPADR	50	612.377	1834.11	1833.85	143.69	Q-STAR	Oxidation (M)
								ALEQDLPVNIK	48	620.399	1238.78	1238.69	77.8647	Q-STAR	Oxidation (M)
								MMAVAADTLQR	47	611.863	1221.71	1221.58	103.945	Q-STAR
								MMAVAADTLQR	44	611.856	1221.7	1221.58	92.2646	Q-STAR
								GDGWLTDPYVLTEVDGK	41	933.082	1864.15	1863.89	139.301	Q-STAR
								TVFGTEPDMIR	40	633.355	1264.7	1264.61	66.1096	Q-STAR	Oxidation (M)
								GNSYFMVEVK	39	587.335	1172.66	1172.55	87.5713	Q-STAR
								MMAVAADTLQR	33	611.846	1221.68	1221.58	76.2215	Q-STAR
								HLEDVFSK	32	487.763	973.512	973.487	25.9439	Q-STAR
								DGSTIPIAK	32	451.294	900.574	900.492	91.7488	Q-STAR	Oxidation (M)
								FLFDTK	32	385.744	769.473	769.401	93.7872	Q-STAR
								TVFGTEPDMIR	31	641.368	1280.72	1280.61	88.9906	Q-STAR	"
															Oxidation (M)
45	2152	1: gi|21071039 carnosinase 1 [Homo sapiens]	56656.1	366	100	16	15	EWVAIESDSVQPVPR	102	856.467	1710.92	1710.86	36.0796	Q-STAR
								MMAVAADTLQR	65	611.836	1221.66	1221.58	59.4744	Q-STAR
								FLFDTKEEILMHLWR	56	660.063	1977.17	1977.02	75.8754	Q-STAR
								MMAVAADTLQR	53	603.838	1205.66	1205.59	59.8147	Q-STAR	Carbamidomethyl (C)
								YPSLSIHGIEGAFDEPGTK	53	673.383	2017.13	2016.98	74.0687	Q-STAR
								GTVCFYGHLDVQPADR	50	612.342	1834.01	1833.85	86.33	Q-STAR	2 Oxidation (M)
								GNSYFMVEVK	50	587.314	1172.61	1172.55	51.7776	Q-STAR
								MMAVAADTLQR	49	619.838	1237.66	1237.58	66.1808	Q-STAR
								TVFGTEPDMIR	49	633.316	1264.62	1264.61	3.57659	Q-STAR
								ALEQDLPVNIK	45	620.382	1238.75	1238.69	50.3969	Q-STAR
								GDGWLTDPYVLTEVDGK	44	933.022	1864.03	1863.89	75.3682	Q-STAR	Oxidation (M)
								HLEDVFSKR	42	565.782	1129.55	1129.59	-34.7038	Q-STAR	Oxidation (M)
								GNSYFMVEVK	33	595.319	1188.62	1188.55	62.5763	Q-STAR
								MMAVAADTLQR	33	611.826	1221.64	1221.58	44.0322	Q-STAR	"(gi|532198) (gi|4557287) (gi|15079348) (gi|37790798) (gi|62089124) (gi|62897155)
45	2152	1: gi|553181 angiotensinogen 2: gi|532198 angiotensinogen 3: gi|4557287 angiotensinogen preproprotein [Homo sapiens] 4: gi|15079348 Angiotensinogen (serpin peptidase inhibitor, clade A, member 8) [Homo sapiens] 5: gi|37790798 angiotensinogen (serine (or cysteine) proteinase inhibitor, clade A (alpha-1 antiproteinase, antitr 6: gi|62089124 angiotensinogen precursor variant [Homo sapiens] 7: gi|628…	36549.9	153	100	5	5	SLDFTELDVAAEK	75	719.392	1436.77	1436.7	45.3531	Q-STAR
								ALQDQLVLVAAK	59	634.908	1267.8	1267.75	40.1459	Q-STAR
								FMQAVTGWK	59	534.302	1066.59	1066.53	58.8893	Q-STAR
								DPTFIPAPIQAK	50	649.394	1296.77	1296.71	50.0159	Q-STAR
								QPFVQGLALYTPVVLPR	42	633.416	1897.23	1897.08	75.8607	Q-STAR	"(gi|553181) (gi|4557287) (gi|15079348) (gi|37790798) (gi|62089124) (gi|62897155)
45	2152	1: gi|532198 angiotensinogen 2: gi|553181 angiotensinogen 3: gi|4557287 angiotensinogen preproprotein [Homo sapiens] 4: gi|15079348 Angiotensinogen (serpin peptidase inhibitor, clade A, member 8) [Homo sapiens] 5: gi|37790798 angiotensinogen (serine (or cysteine) proteinase inhibitor, clade A (alpha-1 antiproteinase, antitr 6: gi|62089124 angiotensinogen precursor variant [Homo sapiens] 7: gi|628…	53121.5	88	100	4	5	DPTFIPAPIQAK	49	649.416	1296.82	1296.71	85.333	Q-STAR
								SLDFTELDVAAEK	48	719.415	1436.81	1436.7	77.5045	Q-STAR
								FMQAVTGWK	41	534.304	1066.59	1066.53	61.9441	Q-STAR
								ALQDQLVLVAAK	37	634.928	1267.84	1267.75	71.8793	Q-STAR	"(gi|37748641) (gi|62898910)
45	2152	1: gi|4504893 kininogen 1 [Homo sapiens] 2: gi|37748641 Kininogen 1 [Homo sapiens] 3: gi|62898910 kininogen 1 variant [Homo sapiens]	47852.7	60	99	2	3	TVGSDTFYSFK	51	626.33	1250.64	1250.58	50.0527	Q-STAR
								QVVAGLNFR	35	502.317	1002.62	1002.56	57.8848	Q-STAR
								DIPTNSPELEETLTHTITK	31	713.752	2138.23	2138.07	75.1101	Q-STAR	"(gi|16555792)
45	2152	1: gi|21071039 carnosinase 1 [Homo sapiens] 2: gi|16555792 glutamate carboxypeptidase-like protein 2 [Homo sapiens]	56656.1	192	100	7	6	SVVLIPLGAVDDGEHSQNEK	66	703.061	2106.16	2106.06	49.0485	Q-STAR
								ALEQDLPVNIK	60	620.381	1238.75	1238.69	49.2877	Q-STAR
								AIHLDLEEYR	57	629.852	1257.69	1257.64	43.2979	Q-STAR
								VFQYIDLHQDEFVQTLK	57	708.401	2122.18	2122.07	50.8743	Q-STAR
								YPSLSIHGIEGAFDEPGTK	55	673.359	2017.05	2016.98	37.1372	Q-STAR
								HLEDVFSK	44	487.775	973.536	973.487	50.2667	Q-STAR	"(gi|532198) (gi|4557287) (gi|15079348) (gi|37790798) (gi|62089124) (gi|62897155)
45	2152	1: gi|553181 angiotensinogen 2: gi|532198 angiotensinogen 3: gi|4557287 angiotensinogen preproprotein [Homo sapiens] 4: gi|15079348 Angiotensinogen (serpin peptidase inhibitor, clade A, member 8) [Homo sapiens] 5: gi|37790798 angiotensinogen (serine (or cysteine) proteinase inhibitor, clade A (alpha-1 antiproteinase, antitr 6: gi|62089124 angiotensinogen precursor variant [Homo sapiens] 7: gi|628…	36549.9	153	100	3	5	ALQDQLVLVAAK	85	634.906	1267.8	1267.75	38.0872	Q-STAR
								SLDFTELDVAAEK	80	719.403	1436.79	1436.7	61.2604	Q-STAR
								DPTFIPAPIQAK	39	649.387	1296.76	1296.71	39.7468	Q-STAR	"(gi|37748641) (gi|62898910) (gi|124056474)
45	2152	1: gi|4504893 kininogen 1 [Homo sapiens] 2: gi|37748641 Kininogen 1 [Homo sapiens] 3: gi|62898910 kininogen 1 variant [Homo sapiens] 4: gi|124056474 Kininogen-1 precursor (Alpha-2-thiol proteinase inhibitor) [Contains: Kininogen-1 heavy chain; Brad	47852.7	95	100	4	4	DIPTNSPELEETLTHTITK	51	713.749	2138.22	2138.07	70.2272	Q-STAR
								TVGSDTFYSFK	49	626.323	1250.63	1250.58	38.9811	Q-STAR	Pyro-glu (N-term Q)
								YFIDFVAR	35	515.801	1029.59	1029.53	57.8187	Q-STAR
								QVVAGLNFR	35	493.298	984.581	985.534	-967.225	Q-STAR	"(gi|37748641) (gi|62898910)
45	2152	1: gi|4504893 kininogen 1 [Homo sapiens] 2: gi|37748641 Kininogen 1 [Homo sapiens] 3: gi|62898910 kininogen 1 variant [Homo sapiens]	47852.7	161	100	6	4	IGEIKEETTSHLR	86	504.94	1511.8	1511.79	2.54334	LTQ-FT
								QVVAGLNFR	54	502.29	1002.57	1002.56	4.43165	LTQ-FT
								TVGSDTFYSFK	50	626.3	1250.59	1250.58	2.85387	LTQ-FT
								YFIDFVAR	50	515.774	1029.53	1029.53	4.76723	LTQ-FT	"
46	5614	1: gi|21071039 carnosinase 1 [Homo sapiens]	56656.1	486	100	19	18	EWVAIESDSVQPVPR	96	856.508	1711	1710.86	84.2893	Q-STAR
								SVVLIPLGAVDDGEHSQNEK	82	703.092	2106.26	2106.06	93.0942	Q-STAR	Carbamidomethyl (C)
								GPVLAWINAVSAFR	62	750.987	1499.96	1499.82	89.5865	Q-STAR
								GTVCFYGHLDVQPADR	61	612.363	1834.07	1833.85	120.65	Q-STAR	Oxidation (M)
								ALEQDLPVNIK	58	620.4	1238.79	1238.69	79.8394	Q-STAR
								MMAVAADTLQR	54	611.853	1221.69	1221.58	87.7753	Q-STAR
								MMAVAADTLQR	53	603.856	1205.7	1205.59	88.6371	Q-STAR	Oxidation (M)
								YPSLSIHGIEGAFDEPGTK	52	673.41	2017.21	2016.98	112.938	Q-STAR
								MMAVAADTLQR	50	611.863	1221.71	1221.58	104.447	Q-STAR
								TVFGTEPDMIR	49	633.368	1264.72	1264.61	85.801	Q-STAR	2 Oxidation (M)
								HLEDVFSK	43	487.778	973.542	973.487	56.5349	Q-STAR	Oxidation (M)
								MMAVAADTLQR	39	619.855	1237.7	1237.58	93.6554	Q-STAR
								MMAVAADTLQR	39	611.885	1221.76	1221.58	140.17	Q-STAR
								GDGWLTDPYVLTEVDGK	37	933.036	1864.06	1863.89	90.5397	Q-STAR
								DGSTIPIAK	36	451.287	900.56	900.492	75.5709	Q-STAR	Oxidation (M)
								GNSYFMVEVK	36	587.344	1172.67	1172.55	101.621	Q-STAR
								GNSYFMVEVK	33	595.357	1188.7	1188.55	127.223	Q-STAR	"(gi|553181) (gi|4557287) (gi|15079348) (gi|37790798) (gi|62089124) (gi|62897155)
46	5614	1: gi|532198 angiotensinogen 2: gi|553181 angiotensinogen 3: gi|4557287 angiotensinogen preproprotein [Homo sapiens] 4: gi|15079348 Angiotensinogen (serpin peptidase inhibitor, clade A, member 8) [Homo sapiens] 5: gi|37790798 angiotensinogen (serine (or cysteine) proteinase inhibitor, clade A (alpha-1 antiproteinase, antitr 6: gi|62089124 angiotensinogen precursor variant [Homo sapiens] 7: gi|628…	53121.5	93	100	3	3	SLDFTELDVAAEK	62	719.437	1436.86	1436.7	108.352	Q-STAR
								ALQDQLVLVAAK	50	634.933	1267.85	1267.75	79.6111	Q-STAR
								VLSALQAVQGLLVAQGR	46	575.062	1722.17	1722.02	87.091	Q-STAR	"(gi|37748641) (gi|62898910)
46	5614	1: gi|4504893 kininogen 1 [Homo sapiens] 2: gi|37748641 Kininogen 1 [Homo sapiens] 3: gi|62898910 kininogen 1 variant [Homo sapiens]	47852.7	91	100	5	4	TVGSDTFYSFK	68	626.358	1250.7	1250.58	95.4108	Q-STAR
								DIPTNSPELEETLTHTITK	37	713.783	2138.33	2138.07	118.091	Q-STAR
								IGEIKEETTSHLR	35	504.99	1511.95	1511.79	102.46	Q-STAR
								QVVAGLNFR	33	501.817	1001.62	1002.56	-938.517	Q-STAR	"(gi|553181) (gi|4557287) (gi|15079348) (gi|37790798) (gi|62089124) (gi|62897155)
46	5614	1: gi|532198 angiotensinogen 2: gi|553181 angiotensinogen 3: gi|4557287 angiotensinogen preproprotein [Homo sapiens] 4: gi|15079348 Angiotensinogen (serpin peptidase inhibitor, clade A, member 8) [Homo sapiens] 5: gi|37790798 angiotensinogen (serine (or cysteine) proteinase inhibitor, clade A (alpha-1 antiproteinase, antitr 6: gi|62089124 angiotensinogen precursor variant [Homo sapiens] 7: gi|628…	53121.5	112	100	4	4	QPFVQGLALYTPVVLPR	74	949.588	1897.16	1897.08	42.0525	Q-STAR
								SLDFTELDVAAEK	54	719.423	1436.83	1436.7	89.1381	Q-STAR
								ADSQAQLLLSTVVGVFTAPGLHLK	38	822.57	2464.69	2464.37	129.292	Q-STAR
								FMQAVTGWK	36	534.305	1066.59	1066.53	63.4968	Q-STAR	"(gi|37748641) (gi|62898910) (gi|124056474)
46	5614	1: gi|4504893 kininogen 1 [Homo sapiens] 2: gi|37748641 Kininogen 1 [Homo sapiens] 3: gi|62898910 kininogen 1 variant [Homo sapiens] 4: gi|124056474 Kininogen-1 precursor (Alpha-2-thiol proteinase inhibitor) [Contains: Kininogen-1 heavy chain; Brad	47852.7	92	100	4	3	DIPTNSPELEETLTHTITK	71	713.794	2138.36	2138.07	133.608	Q-STAR
								YFIDFVAR	47	515.817	1029.62	1029.53	88.5299	Q-STAR
								QVVAGLNFR	34	502.339	1002.66	1002.56	103.137	Q-STAR	"
47	2166	1: gi|21071039 carnosinase 1 [Homo sapiens]	56656.1	324	100	18	18	EWVAIESDSVQPVPR	78	856.478	1710.94	1710.86	49.5266	Q-STAR	Carbamidomethyl (C)
								TVFGTEPDMIR	69	633.344	1264.67	1264.61	48.0424	Q-STAR
								GTVCFYGHLDVQPADR	61	612.349	1834.03	1833.85	97.9711	Q-STAR
								MMAVAADTLQR	59	603.836	1205.66	1205.59	56.0224	Q-STAR
								ALEQDLPVNIK	52	620.388	1238.76	1238.69	60.5851	Q-STAR	Oxidation (M)
								GDGWLTDPYVLTEVDGK	48	933.001	1863.99	1863.89	53.3036	Q-STAR
								MMAVAADTLQR	44	611.816	1221.62	1221.58	26.2831	Q-STAR
								LFAAFFLEMAQLH	43	769.429	1536.84	1536.78	41.0495	Q-STAR
								FLFDTKEEILMHLWR	43	660.065	1977.17	1977.02	77.8814	Q-STAR
								KPAITYGTR	43	503.816	1005.62	1005.56	56.9981	Q-STAR	Oxidation (M)
								YPSLSIHGIEGAFDEPGTK	42	673.377	2017.11	2016.98	64.7429	Q-STAR	Oxidation (M)
								TVFGTEPDMIR	42	641.353	1280.69	1280.61	65.5595	Q-STAR
								MMAVAADTLQR	41	611.837	1221.66	1221.58	61.3818	Q-STAR
								FLFDTK	38	385.729	769.444	769.401	56.0202	Q-STAR
								KPAITYGTR	36	503.801	1005.59	1005.56	26.6747	Q-STAR
								GNSYFMVEVK	33	587.314	1172.61	1172.55	50.4335	Q-STAR	"(gi|532198) (gi|4557287) (gi|15079348) (gi|37790798) (gi|62089124) (gi|62897155)
47	2166	1: gi|553181 angiotensinogen 2: gi|532198 angiotensinogen 3: gi|4557287 angiotensinogen preproprotein [Homo sapiens] 4: gi|15079348 Angiotensinogen (serpin peptidase inhibitor, clade A, member 8) [Homo sapiens] 5: gi|37790798 angiotensinogen (serine (or cysteine) proteinase inhibitor, clade A (alpha-1 antiproteinase, antitr 6: gi|62089124 angiotensinogen precursor variant [Homo sapiens] 7: gi|628…	36549.9	143	100	7	7	SLDFTELDVAAEK	67	719.395	1436.78	1436.7	50.2365	Q-STAR
								DPTFIPAPIQAK	52	649.397	1296.78	1296.71	55.9093	Q-STAR
								LQAILGVPWK	48	562.88	1123.75	1123.68	62.9888	Q-STAR
								FMQAVTGWK	46	534.312	1066.61	1066.53	78.1931	Q-STAR
								ADSQAQLLLSTVVGVFTAPGLHLK	46	822.513	2464.52	2464.37	59.7212	Q-STAR
								ALQDQLVLVAAK	41	634.912	1267.81	1267.75	46.3475	Q-STAR
								QPFVQGLALYTPVVLPR	36	633.402	1897.18	1897.08	53.0177	Q-STAR	2 Oxidation (M)"
47	2166	1: gi|21071039 carnosinase 1 [Homo sapiens]	56656.1	211	100	10	7	MMAVAADTLQR	64	619.8	1237.59	1237.58	4.83201	LTQ-FT
								AIHLDLEEYR	59	629.83	1257.65	1257.64	8.05718	LTQ-FT
								HLEDVFSK	56	487.75	973.485	973.487	-1.45251	LTQ-FT
								HLEDVFSKR	48	377.54	1129.6	1129.59	9.03427	LTQ-FT
								WNYIEGTK	46	505.75	1009.49	1009.49	-1.40071	LTQ-FT	Carbamidomethyl (C)
								KPAITYGTR	38	503.79	1005.57	1005.56	4.72274	LTQ-FT
								GTVCFYGHLDVQPADR	37	612.29	1833.85	1833.85	0.763968	LTQ-FT	"(gi|37748641) (gi|62898910) (gi|124056474)
47	2166	1: gi|4504893 kininogen 1 [Homo sapiens] 2: gi|37748641 Kininogen 1 [Homo sapiens] 3: gi|62898910 kininogen 1 variant [Homo sapiens] 4: gi|124056474 Kininogen-1 precursor (Alpha-2-thiol proteinase inhibitor) [Contains: Kininogen-1 heavy chain; Brad	47852.7	74	100	2	2	QVVAGLNFR	54	502.29	1002.57	1002.56	4.43165	LTQ-FT
								TVGSDTFYSFK	47	626.3	1250.59	1250.58	2.85387	LTQ-FT	"(gi|24497519)
															Oxidation (M)
48	2328	1: gi|416180 Man9-mannosidase [Homo sapiens] 2: gi|24497519 mannosidase, alpha, class 1A, member 1 [Homo sapiens]	70775.9	212	100	9	9	FDGGVEAIATR	71	568.319	1134.62	1134.57	49.1826	Q-STAR	Oxidation (M)
								KMYFDAVQAIETHLIR	62	651.042	1950.1	1950	51.7302	Q-STAR
								MYFDAVQAIETHLIR	59	608.343	1822.01	1821.91	54.6531	Q-STAR
								VNGGYSGLR	47	461.764	921.513	921.467	50.3393	Q-STAR
								GGHSSSLFGNIK	40	602.345	1202.67	1202.6	58.6095	Q-STAR
								GYAWGLNELKPISK	39	525.989	1574.95	1574.85	63.1256	Q-STAR
								GLPPVDFVPPIGVESREPADAAIR	38	834.836	2501.49	2501.33	63.8261	Q-STAR
								EPADAAIR	36	421.746	841.478	841.429	57.5045	Q-STAR
								MYFDAVQAIETHLIR	33	603.022	1806.04	1805.91	72.7405	Q-STAR	"(gi|4503681)
48	2328	1: gi|5080756 Human Fc gamma BP [AA 1-2843] [Homo sapiens] 2: gi|4503681 Fc fragment of IgG binding protein [Homo sapiens]	301609	74	100	2	2	VTLQPYNVAQLQSSVDLSGSK	53	745.435	2233.28	2233.16	55.1488	Q-STAR
								YDLAFVVASQATK	47	706.912	1411.81	1411.73	52.7748	Q-STAR	"
48	2328	1: gi|5802984 UDP-GlcNAc:betaGal beta-1,3-N-acetylglucosaminyltransferase 1 [Homo sapiens]	47088.9	448	100	12	12	TALASGGVLDASGDYR	110	776.916	1551.82	1551.75	41.4757	Q-STAR
								TALASGGVLDASGDYR	84	776.927	1551.84	1551.75	55.6815	Q-STAR	Oxidation (M)
								TALASGGVLDASGDYR	82	776.921	1551.83	1551.75	48.433	Q-STAR	Carbamidomethyl (C)
								TTMDPNDVILATHASVDNLLHLSGLLER	76	766.188	3060.72	3060.55	55.091	Q-STAR
								EEAQLATVLAYALSSHCPDMR	71	788.087	2361.24	2361.11	55.2736	Q-STAR
								WEGPLSVSVFAATK	64	746.426	1490.84	1490.78	40.4507	Q-STAR
								EPGEFALLR	59	516.307	1030.6	1030.54	53.7512	Q-STAR	Carbamidomethyl (C)
								TTMDPNDVILATHASVDNLLHLSGLLER	54	762.202	3044.78	3044.56	71.251	Q-STAR	Carbamidomethyl (C); Oxidation (M)
								ISQACELHVAGFDFEVLNEGFLVHK	40	715.645	2858.55	2858.41	51.3041	Q-STAR
								EEAQLATVLAYALSSHCPDMR	40	793.411	2377.21	2377.1	44.5231	Q-STAR	Carbamidomethyl (C); Oxidation (M)
								VPTFDER	35	432.228	862.442	862.418	27.0971	Q-STAR
								VAMHLVCPSR	34	395.888	1184.64	1184.58	53.1851	Q-STAR
49	3360	no data
															Oxidation (M)"(gi|55962673)
50	3447	1: gi|32171249 prostaglandin H2 D-isomerase [Homo sapiens] 2: gi|55962673 prostaglandin D2 synthase 21kDa (brain) [Homo sapiens]	21015.3	63	98	2	1	TMLLQPAGSLGSYSYR	67	880.489	1758.96	1758.86	58.5612	Q-STAR
															Oxidation (M)
51	3546	gi|1621283 hBRAVO/Nr-CAM precursor	143194	76	90	1	2	VFNTPEGVPSAPSSLK	37.21	815.48	1628.84	1628.94	-63.6609	Q-STAR
								THGMLPGLEPFSHYTLNVR	38.74	547.063	2184.08	2184.22	-66.9803	Q-STAR	"
51	3546	1: gi|410564 beta-trace {N-terminal} [human, cerebrospinal fluid, Peptide Partial, 27 aa]	2891.46	64	95	1	1	APEAQVSVQPNFQQDKFLGR	64	753.778	2258.31	2258.14	73.7513	Q-STAR	Oxidation (M)"(gi|55962670) (gi|55962671) (gi|55962673)
51	3546	1: gi|32171249 prostaglandin H2 D-isomerase [Homo sapiens] 2: gi|55962670 prostaglandin D2 synthase 21kDa (brain) [Homo sapiens] 3: gi|55962671 prostaglandin D2 synthase 21kDa (brain) [Homo sapiens] 4: gi|55962673 prostaglandin D2 synthase 21kDa (brain) [Homo sapiens]	21015.3	53	95	1	1	TMLLQPAGSLGSYSYR	53	587.334	1758.98	1758.86	67.5767	Q-STAR
52	4745	1: gi|230651 Chain A, Prealbumin (Human Plasma) 2: gi|443295 Chain A, Transthyretin (Formerly Prealbumin) 3: gi|443297 Chain A, Transthyretin (Formerly Prealbumin) Mutant With Ala 109 Replaced By Thr (A109t) 4: gi|1827569 Chain A, Transthyretin - V122I CARDIOMYOPATHIC MUTANT 5: gi|2098257 Chain A, Tertiary Structures Of Three Amyloidogenic Transthyretin Variants And Implications For Amy 6: gi|209…	13752	456	90	1	9	GSPAINVAHVFR	48	456.295	1365.86	1365.75	82.6	Q-STAR
								AADDTWEPFASGK	56	697.866	1393.72	1393.62	74.2	Q-STAR
								GSPAINVAHVFRK	47	498.996	1493.97	1493.85	80.5	Q-STAR
								YTIAALLSPYSYSTTAVVTNPK	58	787.477	2359.41	2359.23	75.2	Q-STAR
								ALGISPFHEHAEVVFTANDSGPR	41	613.61	2450.41	2450.2	87	Q-STAR
								TSESGELHGLTTEEEFVEGIYK	56	819.111	2454.31	2454.14	68.5	Q-STAR
								VTIAALLSPYSYSTTAVVTNPKE	54	830.488	2488.44	2488.27	68.1	Q-STAR
								ALGISPFHEHAEVVFTANDSGPRR	37	652.645	2606.51	2606.3	81.4	Q-STAR
								RYTIAALLSPYSYSTTAVVTNPKE	59	882.526	2644.56	2644.37	68.3	Q-STAR
52	4745	1: gi|5834566 chromogranin B (secretogranin 1) [Homo sapiens]	78343.2	189			8	HLEEPGETQNAFLNER	72	628.639	1882.9	1882.88	7.9	LTQ-FT	"
								ADQTVLTEDEKK	46	688.85	1375.68	1375.68	1.2	LTQ-FT
								SSQESGEETGSQENHPQESK	43	725.649	2173.93	2173.9	11.8	LTQ-FT
								EDEEEEEGENYQK	37	814.322	1626.63	1626.62	7.7	LTQ-FT
								DRADQTVLTEDEKK	35	549.945	1646.81	1646.81	1.3	LTQ-FT
								EKSSQESGEETGSQENHPQESK	34	811.357	2431.05	2431.04	4.3	LTQ-FT
								ADQTVLTEDEK	33	624.802	1247.59	1247.59	1.6	LTQ-FT
								ADQTVLTEDEKK	32	459.569	1375.68	1375.68	0.4	LTQ-FT
52	4745	1: gi|62089004 chromogranin B precursor variant [Homo sapiens]	81668.9	164	90	1	8	HLEEPGETQNAFLNER	72	628.639	1882.9	1882.88	7.9	LTQ-FT	"
								ADQTVLTEDEKK	46	688.85	1375.68	1375.68	1.2	LTQ-FT
								EDEEEEEGENYQK	37	814.322	1626.63	1626.62	7.7	LTQ-FT
								DRADQTVLTEDEKK	35	549.945	1646.81	1646.81	1.3	LTQ-FT
								GYPGVQGPEDLEWER	35	866.41	1730.8	1730.79	8.3	LTQ-FT
								ADQTVLTEDEK	33	624.802	1247.59	1247.59	1.6	LTQ-FT
								SSQESGEEAGSQENHPQESK	33	715.645	2143.91	2143.89	11.1	LTQ-FT
								ADQTVLTEDEKK	32	459.569	1375.68	1375.68	0.4	LTQ-FT
52	4745	1: gi|4502807 chromogranin B precursor [Homo sapiens]	78313.2	160	90	1	7	HLEEPGETQNAFLNER	72	628.639	1882.9	1882.88	7.9	LTQ-FT	"
								ADQTVLTEDEKK	46	688.85	1375.68	1375.68	1.2	LTQ-FT
								EDEEEEEGENYQK	37	814.322	1626.63	1626.62	7.7	LTQ-FT
								DRADQTVLTEDEKK	35	549.945	1646.81	1646.81	1.3	LTQ-FT
								SSQESGEEAGSQENHPQESK	33	715.645	2143.91	2143.89	11.1	LTQ-FT
								ADQTVLTEDEK	33	624.802	1247.59	1247.59	1.6	LTQ-FT
								ADQTVLTEDEKK	32	459.569	1375.68	1375.68	0.4	LTQ-FT
52	4745	1: gi|224917 lipoprotein CIII	8759.22	90	100	4	3	DALSSVQESQVAQQAR	65	572.96	1715.86	1715.84	8.4	LTQ-FT	"
								GWVTDGFSSLK	41	598.807	1195.6	1195.59	10	LTQ-FT
								DALSSVQESQVAQQAR	35	858.94	1715.87	1715.84	12.7	LTQ-FT
52	4745	1: gi|337760 cerebroside sulfate activator protein 2: gi|337765 cerebroside sulfate activator protein 3: gi|337767 cerebroside sulfate activator protein 4: gi|1565257 cerebroside sulfate activator [Homo sapiens] 5: gi|11386147 prosaposin isoform a preproprotein [Homo sapiens] 6: gi|48145609 PSAP [Homo sapiens] 7: gi|57209714 prosaposin (variant Gaucher disease and variant metachromatic leukodystr…	60196.7	67	100	3	2	QEILAALEK	51	507.797	1013.58	1013.58	4	LTQ-FT	"(gi|337765) (gi|337767) (gi|1565257) (gi|11386147) (gi|48145609) (gi|57209714) (gi|62089138) (gi|62898141) (gi|110224476)
								GCSFLPDPYQK	43	656.31	1310.61	1310.6	6.7	LTQ-FT
52	4745	1: gi|5453876 proenkephalin [Homo sapiens] 2: gi|49456613 PENK [Homo sapiens]	31166.2	64	100	2	2	DAEEDDSLANSSDLLK	46	861.395	1720.78	1720.76	7.1	LTQ-FT	"(gi|49456613)
								ELLETGDNR	39	523.76	1045.51	1045.5	1.5	LTQ-FT
52	4745	1: gi|36573 unnamed protein product [Homo sapiens] 2: gi|36575 unnamed protein product [Homo sapiens] 3: gi|13477169 Vitronectin [Homo sapiens] 4: gi|88853069 vitronectin precursor [Homo sapiens]	55106.4	56	90	2	2	RVDTVDPPYPR	45	657.847	1313.68	1313.67	4.8	LTQ-FT	"(gi|36575) (gi|13477169) (gi|88853069)
								RVDTVDPPYPR	39	438.9	1313.68	1313.67	3	LTQ-FT
52	4745	1: gi|553734 putative [Homo sapiens]	2269.19	51	90	3	2	GITLSVRP	44	421.759	841.504	841.502	2.5	LTQ-FT	"
								GITLSVRP	37	421.76	841.505	841.502	3.9	LTQ-FT
53	3032	1:gi|4506147 protease, serine, 2 preproprotein [Homo sapiens]	26488	59	90	1	2	NRPGVYTK	42	467.805	933.595	933.503	98.6	Q-STAR
								LSSPAVINSR	17	522.315	1042.62	1042.58	36.9	Q-STAR
53	3032	1: gi|11056046 immunoglobulin superfamily, member 4B [Homo sapiens] 2: gi|74759761 Immunoglobulin superfamily member 4B precursor (Nectin-like protein 1) (TSLC1-like protein 1) (Syna	46991.4	56	100	3	2	SLVTVLGIPQKPIITGYK	50	643.136	1926.39	1926.16	120.356	Q-STAR	Oxidation (M)"(gi|55962673)
54	3718	gi|39654998 Chain A, Hr1b Domain From Prk1	9054	56	51	1	3	MIPATNLSR	33	522.82	1043.62	1043.54	78	Q-STAR	Acetyl (N-term)
								CIPATNLSR	16	537.321	1072.63	1072.53	87.9	Q-STAR	Acetyl (N-term), Carbamidomethyl (C)
								CIPATNLSR	23	537.342	1072.67	1072.53	126.3	Q-STAR	Acetyl (N-term), Carbamidomethyl (C)
54	3718	1: gi|32171249 prostaglandin H2 D-isomerase [Homo sapiens] 2: gi|55962673 prostaglandin D2 synthase 21kDa (brain) [Homo sapiens]	21015.3	55	100	3	3	TMLLQPAGSLGSYSYR	47	880.5	1758.99	1758.86	70.7418	Q-STAR	Carbamidomethyl (C)
								AQGFTEDTIVFLPQTDK	39	637.402	1909.18	1908.95	124.443	Q-STAR
								FTAFCK	31	387.195	772.375	772.358	21.96	Q-STAR	"(gi|2554743) (gi|4502519)
55	4902	1: gi|14277770 Chain A, Nmr Structure Of Human Apolipoprotein C-Ii In The Presence Of Sds 2: gi|28949071 Chain A, Global Structure And Dynamics Of Human Apolipoprotein Cii In Complex With Micelles: Eviden	8909.38	210	100	7	7	STAAMSTYTGIFTDQVLSVLK	71	750.39	2248.15	2248.13	8.2	LTQ-FT	Oxidation (M)"(gi|28949071)
								TAAQNLYEK	66	519.27	1036.53	1036.52	6.3	LTQ-FT
								TYLPAVDEK	65	518.27	1034.53	1034.53	2.8	LTQ-FT
								TQQPQQDEMPSPTFLTQVK	57	740.36	2218.06	2218.06	0.2	LTQ-FT	Oxidation (M)
								STAAMSTYTGIFTDQVLSVLKGEE	48	855.42	2563.24	2563.24	0.7	LTQ-FT	Oxidation (M)
								LRDLYSK	37	447.76	893.505	893.497	9.4	LTQ-FT
								STAAMSTYTGIFTDQVLSVLK	37	1125.07	2248.13	2248.13	1.8	LTQ-FT	Oxidation (M)
55	4902	1: gi|553734 putative [Homo sapiens]	2212.17	151	91	3	18	GITLSVRP	46	421.76	841.505	841.502	3.9	LTQ-FT	"
								GITLSVRP	37	421.76	841.505	841.502	3.9	LTQ-FT
								GITLSVRP	37	421.76	841.505	841.502	3.9	LTQ-FT
								GITLSVRP	35	421.76	841.505	841.502	3.9	LTQ-FT
								GITLSVRP	34	421.76	841.505	841.502	3.9	LTQ-FT
								GITLSVRP	34	421.76	841.505	841.502	3.9	LTQ-FT
								GITLSVRP	34	421.76	841.505	841.502	3.9	LTQ-FT
								GITLSVRP	33	421.76	841.505	841.502	3.9	LTQ-FT
								GITLSVRP	33	421.76	841.505	841.502	3.9	LTQ-FT
								GITLSVRP	33	421.76	841.505	841.502	3.9	LTQ-FT
								GITLSVRP	32	421.76	841.505	841.502	3.9	LTQ-FT
								GITLSVRP	32	421.76	841.505	841.502	3.9	LTQ-FT
								GITLSVRP	32	421.76	841.505	841.502	3.9	LTQ-FT
								GITLSVRP	32	421.76	841.505	841.502	3.9	LTQ-FT
								GITLSVRP	32	421.76	841.505	841.502	3.9	LTQ-FT
								GITLSVRP	31	421.76	841.505	841.502	3.9	LTQ-FT
								GITLSVRP	31	421.76	841.505	841.502	3.9	LTQ-FT
								GITLSVRP	31	421.76	841.505	841.502	3.9	LTQ-FT
55	4902	1: gi|17136078 VGF nerve growth factor inducible precursor [Homo sapiens]	67217.6	132	91	1	3	LADLASDLLLQYLLQGGAR	91	677.38	2029.12	2029.12	1.2	LTQ-FT	"
								GLQEAAEER	56	501.75	1001.49	1001.48	7.6	LTQ-FT
								QAAAQEER	39	443.21	884.405	884.399	7.5	LTQ-FT	Pyro-glu (N-term Q)
55	4902	1: gi|2072129 chromogranin A 2: gi|4502805 chromogranin A precursor [Homo sapiens] 3: gi|6832905 Chromogranin A precursor (CgA) (Pituitary secretory protein I) (SP-I) [Contains: Vasostatin-1 (Vaso 4: gi|28207875 unnamed protein product [Homo sapiens] 5: gi|62898323 chromogranin A variant [Homo sapiens]	50687.6	128	100	2	2	RPEDQELESLSAIEAELEK	101	729.37	2185.09	2185.07	6	LTQ-FT	"(gi|4502805) (gi|6832905) (gi|28207875) (gi|62898323)
								VAHQLQALR	59	518.31	1034.61	1034.6	6.7	LTQ-FT
														LTQ-FT
55	4902	1: gi|180529 chromogranin A	50898.9	128			2	RPEDQELESLSAIEAELEK	101	729.37	2185.09	2185.07	6	LTQ-FT	"
								VAHQLQALR	59	518.31	1034.61	1034.6	6.7	LTQ-FT
														LTQ-FT
55	4902	1: gi|337760 cerebroside sulfate activator protein 2: gi|337765 cerebroside sulfate activator protein 3: gi|337767 cerebroside sulfate activator protein 4: gi|1565257 cerebroside sulfate activator [Homo sapiens] 5: gi|11386147 prosaposin isoform a preproprotein [Homo sapiens] 6: gi|48145609 PSAP [Homo sapiens] 7: gi|57209714 prosaposin (variant Gaucher disease and variant metachromatic leukodystr…	58429	97	91	2	2	QEILAALEK	66	507.8	1013.59	1013.58	9.6	LTQ-FT	"(gi|337765) (gi|337767) (gi|1565257) (gi|11386147) (gi|48145609) (gi|57209714) (gi|62089138) (gi|62898141) (gi|110224476)
								QEILAALEK	62	499.28	996.545	996.549	3.6	LTQ-FT	Pyro-glu (N-term Q)
55	4902	1: gi|7019519 proprotein convertase subtilisin/kexin type 1 inhibitor precursor [Homo sapiens]	27355.8	83	91	1	1	AEAQEAEDQQAR	83	673.3	1344.59	1344.59	3.7	LTQ-FT	"
55	4902	1: gi|497763 Na+, K+ -ATPase catalytic subunit 2: gi|1359715 Na+,K+ ATPase [Homo sapiens] 3: gi|22748667 Na+/K+ -ATPase alpha 3 subunit [Homo sapiens] 4: gi|62898870 Na+/K+ -ATPase alpha 3 subunit variant [Homo sapiens]	111562	76	91	1	1	VDNSSLTGESEPQTR	76	810.38	1618.75	1618.74	1.2	LTQ-FT	"(gi|1359715) (gi|22748667) (gi|62898870)
55	4902	1: gi|20137386 Potassium-transporting ATPase alpha chain 1 (Proton pump) (Gastric H(+)/K(+) ATPase subunit alpha)	114963	76	91	1	1	VDNSSLTGESEPQTR	76	810.38	1618.75	1618.74	1.2	LTQ-FT
55	4902	1: gi|224917 lipoprotein CIII 2: gi|521205 apolipoprotein C-III 3: gi|4557323 apolipoprotein C-III precursor [Homo sapiens]	8759.22	75	91	1	1	DALSSVQESQVAQQAR	75	572.96	1715.86	1715.84	8.3	LTQ-FT	"(gi|521205) (gi|4557323)
55	4902	1: gi|178775 proapolipoprotein 2: gi|178777 proapo-A-I protein 3: gi|2914175 Chain A, Crystal Structure Of Human Apolipoprotein A-I 4: gi|4557321 apolipoprotein A-I preproprotein [Homo sapiens]	28943.9	73	99	2	1	VSFLSALEEYTK	73	693.86	1385.71	1385.71	1.6	LTQ-FT	"(gi|178777) (gi|2914175) (gi|4557321)
55	4902	1: gi|229479 lipoprotein Gln I	28328.7	73	65	1	1	VSFLSALEEYTK	73	693.86	1385.71	1385.71	1.6	LTQ-FT	"
55	4902	1: gi|32171249 prostaglandin H2 D-isomerase [Homo sapiens] 2: gi|55962673 prostaglandin D2 synthase 21kDa (brain) [Homo sapiens]	21015.3	56	100	16	3	GPGEDFR	40	389.18	776.345	776.345	0.2	LTQ-FT	"(gi|55962673)
								AQGFTEDTIVFLPQTDK	33	637.32	1908.94	1908.95	4.5	LTQ-FT
								MATLYSR	32	429.21	856.405	856.411	6.7	LTQ-FT	Oxidation (M)
55	4902	1: gi|7662036 sparc/osteonectin, cwcv and kazal-like domains proteoglycan (testican) 2 [Homo sapiens] 2: gi|37182960 SPOCK2 [Homo sapiens] 3: gi|40788936 KIAA0275 [Homo sapiens]	46748.9	55	91	1	1	IQIQEAAK	55	450.76	899.505	899.508	2.3	LTQ-FT	"(gi|37182960) (gi|40788936)
55	4902	1: gi|5174659 S100 calcium binding protein A13 [Homo sapiens] 2: gi|62632859 S100A13 [Homo sapiens]	11464.1	49	100	2	2	DVGSLDEK	46	431.71	861.405	861.408	2.8	LTQ-FT	"(gi|62632859)
								DSLSVNEFK	33	519.76	1037.51	1037.5	2.4	LTQ-FT
55	4902	1: gi|5834566 chromogranin B (secretogranin 1) [Homo sapiens]	78343.2	153	100	6	5	HLEEPGETQNAFLNER	62	628.639	1882.9	1882.88	7.6	LTQ-FT	"
								EDEEEEEGENYQK	47	814.324	1626.63	1626.62	10.2	LTQ-FT
								SQREDEEEEEGENYQK	46	666.95	1997.83	1997.81	9.3	LTQ-FT
								ELENLAAMDLELQK	43	816.919	1631.82	1631.81	10.1	LTQ-FT	Oxidation (M)
								GYPGVQAPEDLEWER	34	873.421	1744.83	1744.81	11.9	LTQ-FT
55	4902	1: gi|62089004 chromogranin B precursor variant [Homo sapiens]	81668.9	144	78	1	4	HLEEPGETQNAFLNER	62	628.639	1882.9	1882.88	7.6	LTQ-FT	"
								EDEEEEEGENYQK	47	814.324	1626.63	1626.62	10.2	LTQ-FT
								SQREDEEEEEGENYQK	46	666.95	1997.83	1997.81	9.3	LTQ-FT
								ELENLAAMDLELQK	43	816.919	1631.82	1631.81	10.1	LTQ-FT	Oxidation (M)
55	4902	1: gi|1942471 Chain , Apolipoprotein E3 (Apoe3) 2: gi|1942472 Chain , Apolipoprotein E2 (Apoe2, D154a Mutation) 3: gi|15826034 Chain A, Apolipoprotein E3 22kd Fragment Lys146gln Mutant 4: gi|15826264 Chain A, Apolipoprotein E3 22kd Fragment Lys146glu Mutant 5: gi|15826311 Chain A, Apolipoprotein E4 (Apoe4), 22k Fragment	22173.5	130			3	LGPLVEQGR	78	484.78	967.546	967.545	0.5	LTQ-FT	"(gi|1942472) (gi|15826034) (gi|15826264) (gi|15826311)
								SELEEQLTPVAEETR	65	865.927	1729.84	1729.84	1.3	LTQ-FT
								KVEQAVETEPEPELR	37	585.305	1752.89	1752.89	1.5	LTQ-FT
55	4902	1: gi|41281656 CD99 antigen-like 2 isoform E4 [Homo sapiens] 2: gi|41281670 CD99 antigen-like 2 isoform E3-E4 [Homo sapiens] 3: gi|71067336 CD99 antigen-like 2 isoform E3'-E4'-E3-E4 [Homo sapiens]	20458.9	127	100	4	3	RKPIAGGGGFSDKDLEDIVGGGEYKPDK	81	727.13	2904.49	2904.46	9.5	LTQ-FT	"(gi|41281670) (gi|71067336)
								DLEDIVGGGEYKPDK	54	817.905	1633.8	1633.78	7.4	LTQ-FT
								DLEDIVGGGEYKPDK	49	545.604	1633.79	1633.78	4.2	LTQ-FT
55	4902	1: gi|178849 apolipoprotein E 2: gi|178853 apolipoprotein E 3: gi|364011 apolipoprotein E mutant E3K 4: gi|4557325 apolipoprotein E precursor [Homo sapiens]	36301.8	119			2	LGPLVEQGR	78	484.78	967.546	967.545	0.5	LTQ-FT	"(gi|178853) (gi|364011) (gi|4557325)
								SELEEQLTPVAEETR	65	865.927	1729.84	1729.84	1.3	LTQ-FT
55	4902	1: gi|998501 chromogranin B isoform {internal fragment} [human, endocrine tumor extracts, Peptide Partial, 52 aa]	6144.71	70	91	1	2	APRPQSEESWDEED	53	837.857	1673.7	1673.68	11.1	LTQ-FT	"
								GYPGVQAPEDLEWER	34	873.421	1744.83	1744.81	11.9	LTQ-FT
55	4902	1: gi|178855 apolipoprotein J precursor 2: gi|180620 complement cytolysis inhibitor precursor 3: gi|338057 sulfated glycoprotein-2 4: gi|338305 'SP40,40' 5: gi|32891795 clusterin (complement lysis inhibitor, SP-40,40, sulfated glycoprotein 2, testosterone-repressed prostate message 2, apolipoprotein J) [Homo sapiens] 6: gi|42716297 clusterin isoform 1 [Homo sapiens] 7: gi|42740907 clusterin isofo…	49342.3	62			1	ELDESLQVAER	62	644.824	1287.63	1287.63	2.9	LTQ-FT	"(gi|180620) (gi|338057) (gi|338305) (gi|32891795) (gi|42716297) (gi|42740907)
55	4902	1: gi|337760 cerebroside sulfate activator protein 2: gi|337765 cerebroside sulfate activator protein 3: gi|337767 cerebroside sulfate activator protein 4: gi|1565257 cerebroside sulfate activator [Homo sapiens] 5: gi|11386147 prosaposin isoform a preproprotein [Homo sapiens] 6: gi|48145609 PSAP [Homo sapiens] 7: gi|57209714 prosaposin (variant Gaucher disease and variant metachromatic leukodystr…	60196.7	59	100	2	2	QEILAALEK	51	507.798	1013.58	1013.58	5.9	LTQ-FT	"(gi|337765) (gi|337767) (gi|1565257) (gi|11386147) (gi|48145609) (gi|57209714) (gi|62089138) (gi|62898141) (gi|110224476)
								EILDAFDK	35	475.748	949.481	949.476	5.3	LTQ-FT
55	4902	1: gi|553734 putative [Homo sapiens]	2269.19	55	91	3	2	GITLSVRP	44	421.759	841.504	841.502	2.2	LTQ-FT	"
								GITLSVRP	40	421.761	841.507	841.502	5.6	LTQ-FT
55	4902	1: gi|6808151 hypothetical protein [Homo sapiens] 2: gi|14318638 Brevican [Homo sapiens] 3: gi|14714841 Brevican [Homo sapiens] 4: gi|18605564 Brevican [Homo sapiens] 5: gi|38372935 brevican isoform 1 [Homo sapiens] 6: gi|62088720 brevican isoform 1 variant [Homo sapiens]	37354.7	55	91	2	2	ALHPEEDPEGR	42	417.2	1248.58	1248.57	4.1	LTQ-FT	"(gi|14318638) (gi|14714841) (gi|18605564) (gi|38372935) (gi|62088720)
								ALHPEEDPEGR	41	625.298	1248.58	1248.57	6.6	LTQ-FT
55	4902	1: gi|619383 apolipoprotein D, apoD [human, plasma, Peptide, 246 aa] 2: gi|671882 apolipoprotein [Homo sapiens] 3: gi|4502149 apolipoprotein A-II preproprotein [Homo sapiens] 4: gi|24987503 Chain A, Structures Of Apolipoprotein A-Ii And A Lipid Surrogate Complex Provide Insights Into Apolipoprotein-Lipid Interactions	28317.2	54	91	1	1	SPELQAEAK	54	486.757	971.499	971.492	6.9	LTQ-FT	"(gi|671882) (gi|4502149) (gi|24987503)
55	4902	1: gi|5453876 proenkephalin [Homo sapiens] 2: gi|49456613 PENK [Homo sapiens]	31166.2	53	100	2	2	ELLETGDNR	37	523.761	1045.51	1045.5	3.2	LTQ-FT	"(gi|49456613)
								DAEEDDSLANSSDLLK	33	861.396	1720.78	1720.76	8.3	LTQ-FT
55	4902	1: gi|32171249 prostaglandin H2 D-isomerase [Homo sapiens] 2: gi|55962670 prostaglandin D2 synthase 21kDa (brain) [Homo sapiens] 3: gi|55962671 prostaglandin D2 synthase 21kDa (brain) [Homo sapiens] 4: gi|55962673 prostaglandin D2 synthase 21kDa (brain) [Homo sapiens]	21243.4	51	91	1	1	TMLLQPAGSLGSYSYR	51	880.446	1758.88	1758.86	8.9	LTQ-FT	Oxidation (M)"(gi|55962670) (gi|55962671) (gi|55962673)
55	4902	1: gi|5531817 secretogranin III [Homo sapiens] 2: gi|15778922 Secretogranin III [Homo sapiens] 3: gi|19557645 secretogranin III [Homo sapiens]	53047.9	49	91	1	1	LNVEDVDSTK	49	560.283	1118.55	1118.55	4.8	LTQ-FT	"(gi|15778922) (gi|19557645)
56	3290	1: gi|409725 carbonic anhydrase IV 2: gi|2554743 Chain A, Human Carbonic Anhydrase Iv 3: gi|4502519 carbonic anhydrase IV precursor [Homo sapiens]	32884	62	95	1	1	QSPINIVTTK	62	550.847	1099.68	1099.62	50.9529	Q-STAR	"(gi|443295) (gi|443297) (gi|1827569) (gi|2098257) (gi|2098275) (gi|3891451) (gi|3891560) (gi|3891562) (gi|4507725) (gi|4558175) (gi|4558176) (gi|5107791) (gi|14719497) (gi|16975203) (gi|27065112) (gi|48145933) (gi|50513594) (gi|62738386) (gi|62738388) (gi|73535906)
57	4379	1: gi|230651 Chain A, Prealbumin (Human Plasma) 2: gi|443295 Chain A, Transthyretin (Formerly Prealbumin) 3: gi|443297 Chain A, Transthyretin (Formerly Prealbumin) Mutant With Ala 109 Replaced By Thr (A109t) 4: gi|1827569 Chain A, Transthyretin - V122I CARDIOMYOPATHIC MUTANT 5: gi|2098257 Chain A, Tertiary Structures Of Three Amyloidogenic Transthyretin Variants And Implications For Amy 6: gi|209…	13751.9	71	100	3	3	AADDTWEPFASGK	42	697.902	1393.79	1393.61	125.464	Q-STAR
								ALGISPFHEHAEVVFTANDSGPR	39	613.7	2450.77	2450.2	233.904	Q-STAR
								GSPAINVAVHVFR	34	456.315	1365.92	1365.75	125.047	Q-STAR	"
															Oxidation (M)
57	4379	1: gi|17942890 Chain A, An Engineered Transthyretin Monomer That Is Non-Amyloidogenic - Unless Partially Denatured	13754.8	71	100	3	3	AADDTWEPFASGK	42	697.902	1393.79	1393.61	125.464	Q-STAR
								ALGISPMHEHAEVVFTANDSGPR	39	613.7	2450.77	2450.16	247.378	Q-STAR
								GSPAINVAVHVFR	34	456.315	1365.92	1365.75	125.047	Q-STAR	Acetyl (N-term)
															Acetyl (N-term)
57	4379	gi|39654998 Chain A, Hr1b Domain From Prk1	9054	53	93	1	4	MIPATNLSR	22.79	522.304	1043.54	1042.59	911.189	Q-STAR	Acetyl (N-term); Carbamidomethyl (C)
								MIPATNLSR	39.17	522.817	1043.54	1043.62	-72.057	Q-STAR	Acetyl (N-term); Carbamidomethyl (C)
								CIPATNLSR	5.7	537.308	1072.53	1072.6	-63.6769	Q-STAR
								CIPATNLSR	14.32	537.325	1072.53	1072.64	-95.559	Q-STAR
57	4379	gi|34999 unnamed protein product [Homo sapiens] gi|253483 N-cadherin [Homo sapiens] gi|14589889 cadherin 2, type 1 preproprotein [Homo sapiens] gi|22209070 Cadherin 2, type 1, N-cadherin (neuronal) [Homo sapiens]	99802	53	95	1	2	SFPLSSEHAK	17.5	551.836	1101.55	1101.66	-100.757	Q-STAR
								LSLKPTLTEESVK	35.33	482.343	1443.82	1444.01	-130.055	Q-STAR
															Oxidation (M)
58	4388	gi|32171249 prostaglandin H2 D-isomerase [Homo sapiens]	21015	87	91	2	4	MATLYSR	19.43	421.25	840.416	840.486	-82.3334	Q-STAR
								TMLLQPAGSLGSYSYR	27.49	880.523	1758.86	1759.03	-96.9852	Q-STAR
								AQGFTEDTIVFLPQTDK	20.79	955.7	1908.95	1909.39	-229.655	Q-STAR
								EKFTAFCKAQGFTEDTIVFLPQTDK	19.18	955.7	2863.41	2864.08	-233.234	Q-STAR	Acetyl (N-term)
															Acetyl (N-term)
58	4388	gi|39654998 Chain A, Hr1b Domain From Prk1	9054	75	43	1	3	DIPATNLSR	25.11	514.319	1027.53	1026.62	883.577	Q-STAR	Acetyl (N-term)
								MIPATNLSR	28.95	522.818	1043.54	1043.62	-75.7937	Q-STAR
								FIPATNLSR	23.3	530.313	1059.57	1058.61	906.659	Q-STAR	"(gi|443297) (gi|1827569) (gi|2098255) (gi|2098257) (gi|3891451) (gi|3891560) (gi|3891562) (gi|4507725) (gi|14719497) (gi|48145933) (gi|50513594) (gi|55669575) (gi|62738386) (gi|62738388) (gi|73535906) (gi|27065112) (gi|31615374)
58	4388	1: gi|443295 Chain A, Transthyretin (Formerly Prealbumin) 2: gi|443297 Chain A, Transthyretin (Formerly Prealbumin) Mutant With Ala 109 Replaced By Thr (A109t) 3: gi|1827569 Chain A, Transthyretin - V122I CARDIOMYOPATHIC MUTANT 4: gi|2098255 Chain A, Tertiary Structures Of Three Amyloidogenic Transthyretin Variants And Implications For Amy 5: gi|2098257 Chain A, Tertiary Structures Of Three Amylo…	13752.9	63	100	4	4	GSPAINVAVHVFR	41	456.317	1365.93	1365.75	129.247	Q-STAR
								ALGISPFHEHAEVVFTANDSGPR	36	613.646	2450.56	2450.2	146.295	Q-STAR
								AADDTWEPFASGK	35	697.888	1393.76	1393.61	105.599	Q-STAR
								VEIDTK	31	352.725	703.436	703.375	86.3494	Q-STAR	"
59	2192	1: gi|21071039 carnosinase 1 [Homo sapiens]	56656.1	673	100	23	21	EWVAIESDSVQPVPR	103	856.475	1710.94	1710.86	45.2504	Q-STAR
								FIIEGMEEAGSVALEELVEKEKDR	101	681.136	2720.51	2720.36	57.2443	Q-STAR	Oxidation (M)
								GPVLAWINAVSAFR	89	750.957	1499.9	1499.82	50.1872	Q-STAR
								FIIEGMEEAGSVALEELVEKEKDR	82	685.136	2736.52	2736.35	59.6933	Q-STAR
								VFQYIDLHQDEFVQTLK	75	708.416	2122.23	2122.07	71.8015	Q-STAR
								YPSLSIHGIEGAFDEPGTK	71	673.369	2017.09	2016.98	53.2499	Q-STAR	Carbamidomethyl (C)
								SVVLIPLGAVDDGEHSQNEK	67	703.066	2106.18	2106.06	55.6793	Q-STAR
								GTVCFYGHLDVQPADR	62	612.327	1833.96	1833.85	60.6479	Q-STAR
								ALEQDLPVNIK	62	620.391	1238.77	1238.69	64.6539	Q-STAR
								GDGWLTDPYVLTEVDGK	59	932.993	1863.97	1863.89	44.3728	Q-STAR
								FIIEGMEEAGSVALEELVEKEK	58	817.461	2449.36	2449.23	53.5985	Q-STAR
								FIIEGMEEAGSVALEELVEK	55	731.751	2192.23	2192.09	63.1141	Q-STAR	Oxidation (M)
								MMAVAADTLQR	54	603.834	1205.65	1205.59	53.446	Q-STAR
								LFAAFFLEMAQLH	52	777.433	1552.85	1552.77	49.2544	Q-STAR
								LFAAFFLEMAQLH	45	769.451	1536.89	1536.78	70.502	Q-STAR	Oxidation (M)
								TVFGTEPDMIR	42	633.34	1264.67	1264.61	42.8202	Q-STAR	Oxidation (M)
								GNSYFMVEVK	42	595.318	1188.62	1188.55	60.9862	Q-STAR
								GNSYFMVEVK	39	595.323	1188.63	1188.55	70.0039	Q-STAR
								KPAITYGTR	37	503.81	1005.61	1005.56	45.3548	Q-STAR
								GNSYFMVEVK	35	587.318	1172.62	1172.55	58.237	Q-STAR
								AIHLDLEEYR	31	420.245	1257.71	1257.64	62.8068	Q-STAR	"(gi|553181) (gi|4557287) (gi|15079348) (gi|37790798) (gi|62089124) (gi|62897155)
59	2192	1: gi|532198 angiotensinogen 2: gi|553181 angiotensinogen 3: gi|4557287 angiotensinogen preproprotein [Homo sapiens] 4: gi|15079348 Angiotensinogen (serpin peptidase inhibitor, clade A, member 8) [Homo sapiens] 5: gi|37790798 angiotensinogen (serine (or cysteine) proteinase inhibitor, clade A (alpha-1 antiproteinase, antitr 6: gi|62089124 angiotensinogen precursor variant [Homo sapiens] 7: gi|628…	53121.5	173	100	9	9	SLDFTELDVAAEK	67	719.392	1436.77	1436.7	45.7053	Q-STAR
								AAMVGMLANFLGFR	63	749.435	1496.86	1496.76	61.9824	Q-STAR
								ADSQAQLLLSTVVGVFTAPGLHLK	61	822.515	2464.52	2464.37	62.4322	Q-STAR
								DPTFIPAPIQAK	45	649.395	1296.78	1296.71	52.0086	Q-STAR
								LDTEDKLR	43	495.294	988.573	988.519	54.3055	Q-STAR
								LQAILGVPWK	42	562.872	1123.73	1123.68	47.4078	Q-STAR
								FMQAVTGWK	42	534.295	1066.57	1066.53	44.6112	Q-STAR
								QPFVQGLALYTPVVLPR	39	633.407	1897.2	1897.08	62.1676	Q-STAR
								ALQDQLVLVAAK	38	634.913	1267.81	1267.75	47.9582	Q-STAR	"
59	2192	1: gi|9665262 EGF-containing fibulin-like extracellular matrix protein 1 precursor [Homo sapiens]	54604.2	165	100	6	6	EHIVDLEMLTVSSIGTFR	69	683.062	2046.16	2046.05	57.595	Q-STAR	Oxidation (M)
								SGNENGEFYLR	50	643.325	1284.64	1284.57	48.8582	Q-STAR	Carbamidomethyl (C)
								EHIVDLEMLTVSSIGTFR	50	688.394	2062.16	2062.04	57.5168	Q-STAR	Oxidation (M)
								ADQVCINLR	47	544.81	1087.61	1087.54	55.9839	Q-STAR	2 Carbamidomethyl (C)
								QTSPVSAMLVLVK	43	694.929	1387.84	1387.77	49.7667	Q-STAR
								CVNHYGGYLCLPK	43	527.617	1579.83	1579.73	64.0243	Q-STAR	"(gi|15778922) (gi|19557645)
59	2192	1: gi|5531817 secretogranin III [Homo sapiens] 2: gi|15778922 Secretogranin III [Homo sapiens] 3: gi|19557645 secretogranin III [Homo sapiens]	53047.9	136	100	5	5	VTPMAAIQDGLAK	68	657.893	1313.77	1313.7	52.6611	Q-STAR
								SSPLDNKLNVEDVDSTK	54	621.015	1860.02	1859.91	60.5819	Q-STAR
								EKETLITIMK	43	603.386	1204.76	1204.67	69.0394	Q-STAR
								FQDDPDGLHQLDGTPLTAEDIVHK	42	666.116	2660.43	2660.27	60.8742	Q-STAR
								TLIDFVK	39	418.272	834.53	834.485	54.3317	Q-STAR	"(gi|1340142) (gi|4165890) (gi|6980544) (gi|21961493) (gi|50659080)
59	2192	1: gi|177933 alpha-1-antichymotrypsin precursor 2: gi|1340142 alpha1-antichymotrypsin [Homo sapiens] 3: gi|4165890 alpha-1-antichymotrypsin precursor [Homo sapiens] 4: gi|6980544 Chain A, Alpha1-Antichymotrypsin Serpin In The Delta Conformation (Partial Loop Insertion) 5: gi|21961493 Serpin peptidase inhibitor, clade A (alpha-1 antiproteinase, antitrypsin), member 3 [Homo sapiens] 6: gi|50659080 …	45453.4	113	100	4	4	ITLLSALVETR	83	608.404	1214.79	1214.72	57.6263	Q-STAR
								AVLDVFEEGTEASAATAVK	50	636.694	1907.06	1906.95	57.0486	Q-STAR
								EQLSLLDR	49	487.299	972.584	972.524	61.9429	Q-STAR
								EIGELYLPK	42	531.327	1060.64	1060.58	56.5973	Q-STAR	"(gi|37748641) (gi|62898910) (gi|124056474)
59	2192	1: gi|4504893 kininogen 1 [Homo sapiens] 2: gi|37748641 Kininogen 1 [Homo sapiens] 3: gi|62898910 kininogen 1 variant [Homo sapiens] 4: gi|124056474 Kininogen-1 precursor (Alpha-2-thiol proteinase inhibitor) [Contains: Kininogen-1 heavy chain; Brad	47852.7	100	100	4	4	DIPTNSPELEETLTHTITK	56	713.738	2138.19	2138.07	55.0537	Q-STAR
								TVGSDTFYSFK	52	626.335	1250.66	1250.58	58.9829	Q-STAR
								QVVAGLNFR	40	502.315	1002.61	1002.56	53.8291	Q-STAR
								YFIDFVAR	38	515.798	1029.58	1029.53	52.4493	Q-STAR	"(gi|36575) (gi|13477169) (gi|88853069)
59	2192	1: gi|36573 unnamed protein product [Homo sapiens] 2: gi|36575 unnamed protein product [Homo sapiens] 3: gi|13477169 Vitronectin [Homo sapiens] 4: gi|88853069 vitronectin precursor [Homo sapiens]	54308.1	75	100	2	2	FEDGVLDPDYPR	57	711.874	1421.73	1421.65	60.802	Q-STAR
								DWHGVPGQVDAAMAGR	55	556.292	1665.85	1665.77	51.6116	Q-STAR	"
59	2192	1: gi|4826876 osteomodulin [Homo sapiens]	49460.2	67	99	2	3	LQDIPYNIFNLPNIVELSVGHNK	41	879.861	2636.56	2636.4	62.923	Q-STAR
								LLLGYNEISK	38	575.372	1148.73	1148.64	74.4904	Q-STAR
								LPNLLQLHLEHNNLEEFPFPLPK	34	688.913	2751.62	2751.47	53.8202	Q-STAR	"(gi|177809) (gi|177933) (gi|1340142) (gi|4165890) (gi|6980544) (gi|15341985) (gi|21961493) (gi|50659080)
59	2192	1: gi|28332 unnamed protein product [Homo sapiens] 2: gi|177809 alpha-1-antichymotrypsin 3: gi|177933 alpha-1-antichymotrypsin precursor 4: gi|1340142 alpha1-antichymotrypsin [Homo sapiens] 5: gi|4165890 alpha-1-antichymotrypsin precursor [Homo sapiens] 6: gi|6980544 Chain A, Alpha1-Antichymotrypsin Serpin In The Delta Conformation (Partial Loop Insertion) 7: gi|15341985 SERPINA3 protein [Homo sa…	25160	78	95	1	1	ITLLSALVETR	78	608.393	1214.77	1214.72	40.2972	Q-STAR	2 Oxidation (M)"
59	2192	1: gi|21071039 carnosinase 1 [Homo sapiens]	56656.1	204	100	9	7	MMAVAADTLQR	65	619.8	1237.59	1237.58	4.83201	LTQ-FT
								YPSLSIHGIEGAFDEPGTK	56	673.34	2017	2016.98	9.40515	LTQ-FT
								HLEDVFSKR	56	377.54	1129.6	1129.59	9.03427	LTQ-FT
								AIHLDLEEYR	55	629.83	1257.65	1257.64	8.05718	LTQ-FT
								WNYIEGTK	45	505.75	1009.49	1009.49	-1.40071	LTQ-FT
								HLEDVFSK	44	487.75	973.485	973.487	-1.45251	LTQ-FT
								KPAITYGTR	39	503.79	1005.57	1005.56	4.72274	LTQ-FT	Oxidation (M)"(gi|9665262) (gi|62088004)
59	2192	1: gi|7512417 extracellular protein - human 2: gi|9665262 EGF-containing fibulin-like extracellular matrix protein 1 precursor [Homo sapiens] 3: gi|62088004 EGF-containing fibulin-like extracellular matrix protein 1 isoform b variant [Homo sapiens]	43108.8	201	100	6	5	QTSPVSAMLVLVK	63	694.9	1387.79	1387.77	7.92852	LTQ-FT	Carbamidomethyl (C)
								SGNENGEFYLR	62	643.3	1284.59	1284.57	9.3712	LTQ-FT	2 Carbamidomethyl (C)
								ADQVCINLR	61	544.78	1087.55	1087.54	0.96088	LTQ-FT	2 Carbamidomethyl (C)
								LNCEDIDECR	59	662.274	1322.53	1322.52	8.13672	LTQ-FT
								GSFACQCPPGYQK	59	750.33	1498.65	1498.63	8.11539	LTQ-FT	"(gi|177933) (gi|443345) (gi|1340142) (gi|2982038) (gi|2982150) (gi|2982165) (gi|4165890) (gi|6980544) (gi|21961493) (gi|50659080)
59	2192	1: gi|177809 alpha-1-antichymotrypsin 2: gi|177933 alpha-1-antichymotrypsin precursor 3: gi|443345 Chain A, Alpha1 Antichymotrypsin 4: gi|1340142 alpha1-antichymotrypsin [Homo sapiens] 5: gi|2982038 Chain A, Cleaved Antichymotrypsin A349r 6: gi|2982150 Chain A, Cleaved Antichymotrypsin A347r 7: gi|2982165 Chain A, Cleaved Antichymotrypsin T345r 8: gi|4165890 alpha-1-antichymotrypsin precursor [Ho…	48606	158	100	4	4	ADLSGITGAR	96	480.76	959.505	959.504	1.95622	LTQ-FT
								NLAVSQVVHK	67	547.82	1093.63	1093.62	1.00949	LTQ-FT
								EQLSLLDR	44	487.27	972.525	972.524	1.50228	LTQ-FT
								EIGELYLPK	38	531.3	1060.59	1060.58	4.74646	LTQ-FT	Oxidation (M)"(gi|13477169) (gi|88853069)
59	2192	1: gi|36573 unnamed protein product [Homo sapiens] 2: gi|13477169 Vitronectin [Homo sapiens] 3: gi|88853069 vitronectin precursor [Homo sapiens]	54308.1	107	100	5	5	DWHGVPGQVDAAMAGR	68	561.6	1681.78	1681.76	9.00305	LTQ-FT
								DVWGIEGPIDAAFTR	58	823.92	1645.83	1645.81	9.40631	LTQ-FT	Oxidation (M)
								QPQFISR	33	438.24	874.465	874.466	-0.722727	LTQ-FT
								IYISGMAPRPSLAK	32	507.286	1518.84	1518.82	8.14315	LTQ-FT
								GSQYWR	31	398.69	795.365	795.366	-1.15167	LTQ-FT	"(gi|37748641) (gi|62898910) (gi|124056474)
59	2192	1: gi|4504893 kininogen 1 [Homo sapiens] 2: gi|37748641 Kininogen 1 [Homo sapiens] 3: gi|62898910 kininogen 1 variant [Homo sapiens] 4: gi|124056474 Kininogen-1 precursor (Alpha-2-thiol proteinase inhibitor) [Contains: Kininogen-1 heavy chain; Brad	47852.7	79	100	2	2	QVVAGLNFR	57	502.29	1002.57	1002.56	4.43165	LTQ-FT
								TVGSDTFYSFK	50	626.3	1250.59	1250.58	2.85387	LTQ-FT	"(gi|15778922) (gi|19557645) (gi|38197102)
															Oxidation (M)
59	2192	1: gi|5531817 secretogranin III [Homo sapiens] 2: gi|15778922 Secretogranin III [Homo sapiens] 3: gi|19557645 secretogranin III [Homo sapiens] 4: gi|38197102 SCG3 protein [Homo sapiens]	53047.9	66	100	2	2	GILDKEEAEAIKR	66	491.28	1470.82	1470.8	9.54172	LTQ-FT
								MRDFINK	33	470.24	938.465	938.464	1.16467	LTQ-FT	"(gi|2098255) (gi|2098257) (gi|3891560) (gi|4507725) (gi|55669575) (gi|62738386) (gi|73535906)
60	5336	1: gi|443295 Chain A, Transthyretin (Formerly Prealbumin) 2: gi|2098255 Chain A, Tertiary Structures Of Three Amyloidogenic Transthyretin Variants And Implications For Amy 3: gi|2098257 Chain A, Tertiary Structures Of Three Amyloidogenic Transthyretin Variants And Implications For Amy 4: gi|3891560 Chain A, Tertiary Structures Of Three Amyloidogenic Transthyretin Variants And Implications For Amy…	13752.9	224	100	7	6	AADDTWEPFASGK	76	697.868	1393.72	1393.61	76.7163	Q-STAR
								YTIAALLSPYSYSTTAVVTNPKE	72	830.492	2488.46	2488.27	73.0454	Q-STAR
								YTIAALLSPYSYSTTAVVTNPK	55	787.49	2359.45	2359.23	91.398	Q-STAR
								GSPAINVAVHVFR	49	456.294	1365.86	1365.75	78.5934	Q-STAR
								TSESGELHGLTTEEEFVEGIYK	48	819.122	2454.34	2454.14	81.6057	Q-STAR
								TSESGELHGLTTEEEFVEGIYKVEIDTK	31	786	3139.97	3139.51	147.322	Q-STAR	Carbamidomethyl (C)"(gi|4557325)
61	3009	1: gi|364011 apolipoprotein E mutant E3K 2: gi|4557325 apolipoprotein E precursor [Homo sapiens]	36130.8	91	100	8	7	LGADMEDVCGR	63	611.812	1221.61	1221.51	79.3615	Q-STAR
								LGPLVEQGR	54	484.805	967.595	967.545	51.4426	Q-STAR
								AKLEEQAQQIR	49	657.406	1312.8	1312.71	67.414	Q-STAR
								DRLDEVKEQVAEVR	44	562.686	1685.04	1684.87	96.1276	Q-STAR
								LEEQAQQIR	40	557.836	1113.66	1113.58	72.1072	Q-STAR
								SELEEQLTPVAEETR	37	865.99	1729.96	1729.84	73.8827	Q-STAR
								ELQAAQAR	36	443.781	885.548	885.467	91.6138	Q-STAR	"(gi|180620) (gi|338057) (gi|338305) (gi|32891795) (gi|42716297) (gi|42740907)
61	3009	1: gi|178855 apolipoprotein J precursor 2: gi|180620 complement cytolysis inhibitor precursor 3: gi|338057 sulfated glycoprotein-2 4: gi|338305 'SP40,40' 5: gi|32891795 clusterin (complement lysis inhibitor, SP-40,40, sulfated glycoprotein 2, testosterone-repressed pr 6: gi|42716297 clusterin isoform 1 [Homo sapiens] 7: gi|42740907 clusterin isoform 2 [Homo sapiens]	48772.1	58	99	2	2	ELDESLQVAER	58	644.886	1287.76	1287.63	97.973	Q-STAR
								ASSIIDELFQDR	32	697.394	1392.77	1392.69	60.6877	Q-STAR	"(gi|364011) (gi|4557325)
61	3009	1:gi|4506147 protease, serine, 2 preproprotein [Homo sapiens]	26488	46			2	NRPGVYTK	27	467.793	933.572	933.503	73.9	Q-STAR
								LSSPAVINSR	19	522.299	1042.58	1042.58	5.9	Q-STAR
62	3042	1: gi|178849 apolipoprotein E 2: gi|364011 apolipoprotein E mutant E3K 3: gi|4557325 apolipoprotein E precursor [Homo sapiens]	36187.8	65	100	5	5	AATVGSLAGQPLQER	46	749.431	1496.85	1496.79	35.1504	Q-STAR
								VQAAVGTSAAPVPSDNH	40	810.946	1619.88	1619.79	53.7193	Q-STAR	Carbamidomethyl (C)
								SELEEQLTPVAEETR	38	866.039	1730.06	1729.84	130.649	Q-STAR
								LGADMEDVCGR	35	611.83	1221.65	1221.51	110.199	Q-STAR	"(gi|180620) (gi|32891795) (gi|42740907) (gi|57997569) (gi|338057) (gi|42716297)
62	3042	1: gi|178855 apolipoprotein J precursor 2: gi|180620 complement cytolysis inhibitor precursor 3: gi|32891795 clusterin (complement lysis inhibitor, SP-40,40, sulfated glycoprotein 2, testosterone-repressed pr 4: gi|42740907 clusterin isoform 2 [Homo sapiens] 5: gi|57997569 hypothetical protein [Homo sapiens] 6: gi|338057 sulfated glycoprotein-2 7: gi|42716297 clusterin isoform 1 [Homo sapiens]	48772.1	59	100	3	2	ELDESLQVAER	56	644.948	1287.88	1287.63	195.287	Q-STAR
								ASSIIDELFQDR	38	697.413	1392.81	1392.69	88.7959	Q-STAR	"(gi|4557325)
															Carbamidomethyl (C)
62	3042	1: gi|364011 apolipoprotein E mutant E3K 2: gi|4557325 apolipoprotein E precursor [Homo sapiens]	36130.8	71	100	9	8	AKLEEQAQQIR	56	657.413	1312.81	1312.71	77.4345	Q-STAR
								LGADMEDVCGR	50	611.807	1221.6	1221.51	72.3063	Q-STAR
								LGPLVEQGR	47	484.819	967.623	967.545	80.3859	Q-STAR
								EQVAEVR	42	415.747	829.479	829.429	60.2354	Q-STAR
								LQAEAFQAR	40	517.345	1032.68	1032.54	136.637	Q-STAR	Oxidation (M)
								GEVQAMLGQSTEELR	37	824.43	1646.85	1646.79	31.8996	Q-STAR
								GEVQAMLGQSTEELR	36	832.489	1662.96	1662.79	105.935	Q-STAR
								ELQAAQAR	36	443.786	885.557	885.467	101.606	Q-STAR	"(gi|178855) (gi|180620) (gi|32891795) (gi|42740907) (gi|338057) (gi|42716297)
63	3016	1: gi|338305 'SP40,40' 2: gi|178855 apolipoprotein J precursor 3: gi|180620 complement cytolysis inhibitor precursor 4: gi|32891795 clusterin (complement lysis inhibitor, SP-40,40, sulfated glycoprotein 2, testosterone-repressed pr 5: gi|42740907 clusterin isoform 2 [Homo sapiens] 6: gi|338057 sulfated glycoprotein-2 7: gi|42716297 clusterin isoform 1 [Homo sapiens]	36712	52	100	2	1	ELDESLQVAER	56	644.925	1287.83	1287.63	158.382	Q-STAR	"(gi|180620) (gi|32891795) (gi|42716297) (gi|42740907)
64	3050	1: gi|178855 apolipoprotein J precursor 2: gi|180620 complement cytolysis inhibitor precursor 3: gi|32891795 clusterin (complement lysis inhibitor, SP-40,40, sulfated glycoprotein 2, testosterone-repressed pr 4: gi|42716297 clusterin isoform 1 [Homo sapiens] 5: gi|42740907 clusterin isoform 2 [Homo sapiens]	48772.1	82	100	4	3	ELDESLQVAER	63	644.906	1287.8	1287.63	129.14	Q-STAR
								LFDSDPITVTVPVEVSR	54	937.596	1873.18	1872.98	104.081	Q-STAR
								EIQNAVNGVK	36	536.341	1070.67	1070.57	88.3378	Q-STAR	Carbamidomethyl (C)"(gi|364011) (gi|4557325)
64	3050	1: gi|178849 apolipoprotein E 2: gi|364011 apolipoprotein E mutant E3K 3: gi|4557325 apolipoprotein E precursor [Homo sapiens]	36187.8	77	100	5	5	LGADMEDVCGR	57	611.809	1221.6	1221.51	75.0095	Q-STAR
								SELEEQLTPVAEETR	53	866.036	1730.06	1729.84	127.183	Q-STAR
								LGPLVEQGR	44	484.825	967.635	967.545	93.0344	Q-STAR
								LQAEAFQAR	40	517.331	1032.65	1032.54	108.883	Q-STAR	Carbamidomethyl (C)"(gi|4557325)
64	3050	1: gi|364011 apolipoprotein E mutant E3K 2: gi|4557325 apolipoprotein E precursor [Homo sapiens]	36130.8	156	100	10	10	LGADMEDVCGR	70	611.834	1221.65	1221.51	116.429	Q-STAR
								GEVQAMLGQSTEELR	61	824.459	1646.9	1646.79	67.0928	Q-STAR	Oxidation (M)
								AATVGSLAGQPLQER	51	749.464	1496.91	1496.79	80.0197	Q-STAR
								GEVQAMLGQSTEELR	44	832.465	1662.92	1662.79	76.6574	Q-STAR
								DRLDEVKEQVAEVR	44	562.704	1685.09	1684.87	128.822	Q-STAR
								LQAEAFQAR	43	517.318	1032.62	1032.54	83.7705	Q-STAR
								LEEQAQQIR	43	557.836	1113.66	1113.58	72.2689	Q-STAR
								ELQAAQAR	37	443.775	885.536	885.467	78.0391	Q-STAR
								SELEEQLTPVAEETR	36	865.999	1729.98	1729.84	84.5635	Q-STAR	"(gi|180620) (gi|338057) (gi|338305) (gi|32891795) (gi|42716297) (gi|42740907)
64	3050	1: gi|178855 apolipoprotein J precursor 2: gi|180620 complement cytolysis inhibitor precursor 3: gi|338057 sulfated glycoprotein-2 4: gi|338305 'SP40,40' 5: gi|32891795 clusterin (complement lysis inhibitor, SP-40,40, sulfated glycoprotein 2, testosterone-repressed pr 6: gi|42716297 clusterin isoform 1 [Homo sapiens] 7: gi|42740907 clusterin isoform 2 [Homo sapiens]	48772.1	60	100	3	3	ASSIIDELFQDR	50	697.419	1392.82	1392.69	97.3161	Q-STAR
								ELDESLQVAER	47	644.868	1287.72	1287.63	70.0535	Q-STAR
								VTTVASHTSDSDVPSGVTEVVVK	31	772.148	2313.42	2313.17	109.249	Q-STAR	Carbamidomethyl (C)"(gi|4557325)
65	3075	1: gi|364011 apolipoprotein E mutant E3K 2: gi|4557325 apolipoprotein E precursor [Homo sapiens]	36130.8	114	100	7	6	LGADMEDVCGR	76	611.84	1221.67	1221.51	126.356	Q-STAR
								AKLEEQAQQIR	61	657.454	1312.89	1312.71	140.332	Q-STAR
								LGPLVEQGR	51	484.843	967.672	967.545	131.218	Q-STAR
								LAVYQAGAR	41	474.832	947.649	947.519	136.951	Q-STAR
								AATVGSLAGQPLQER	31	749.502	1496.99	1496.79	130.354	Q-STAR	"(gi|180620) (gi|32891795) (gi|42716297) (gi|42740907)
65	3075	1: gi|178855 apolipoprotein J precursor 2: gi|180620 complement cytolysis inhibitor precursor 3: gi|32891795 clusterin (complement lysis inhibitor, SP-40,40, sulfated glycoprotein 2, testosterone-repressed pr 4: gi|42716297 clusterin isoform 1 [Homo sapiens] 5: gi|42740907 clusterin isoform 2 [Homo sapiens]	48772.1	78	100	3	3	ELDESLQVAER	51	644.876	1287.74	1287.63	82.3085	Q-STAR
								LFDSDPITVTVPVEVSR	48	937.606	1873.2	1872.98	114.842	Q-STAR
								ASSIIDELFQDR	43	697.415	1392.82	1392.69	91.6723	Q-STAR	Carbamidomethyl (C)"(gi|4557325)
65	3075	1: gi|364011 apolipoprotein E mutant E3K 2: gi|4557325 apolipoprotein E precursor [Homo sapiens]	36130.8	133	100	11	10	LGADMEDVCGR	63	611.813	1221.61	1221.51	82.2645	Q-STAR
								LGPLVEQGR	53	484.826	967.638	967.545	95.9718	Q-STAR
								AATVGSLAGQPLQER	48	749.467	1496.92	1496.79	83.8893	Q-STAR
								AKLEEQAQQIR	47	657.412	1312.81	1312.71	75.3045	Q-STAR
								SELEEQLTPVAEETR	44	865.993	1729.97	1729.84	78.2207	Q-STAR
								VQAAVGTSAAPVPSDNH	40	810.959	1619.9	1619.79	70.1597	Q-STAR
								DRLDEVKEQVAEVR	37	562.694	1685.06	1684.87	110.237	Q-STAR
								LDEVKEQVAEVR	33	472.312	1413.92	1413.75	119.557	Q-STAR	"(gi|178855) (gi|180620) (gi|338057) (gi|32891795) (gi|42716297) (gi|42740907)
65	3075	1: gi|338305 'SP40,40' 2: gi|178855 apolipoprotein J precursor 3: gi|180620 complement cytolysis inhibitor precursor 4: gi|338057 sulfated glycoprotein-2 5: gi|32891795 clusterin (complement lysis inhibitor, SP-40,40, sulfated glycoprotein 2, testosterone-repressed pr 6: gi|42716297 clusterin isoform 1 [Homo sapiens] 7: gi|42740907 clusterin isoform 2 [Homo sapiens]	36712	73	100	3	3	LFDSDPITVTVPVEVSR	57	937.561	1873.11	1872.98	66.7267	Q-STAR
								ELDESLQVAER	55	644.915	1287.81	1287.63	143.053	Q-STAR
								ASSIIDELFQDR	43	697.363	1392.71	1392.69	15.9296	Q-STAR	"(gi|180620) (gi|32891795) (gi|42716297) (gi|42740907)
66	3038	1: gi|178855 apolipoprotein J precursor 2: gi|180620 complement cytolysis inhibitor precursor 3: gi|32891795 clusterin (complement lysis inhibitor, SP-40,40, sulfated glycoprotein 2, testosterone-repressed pr 4: gi|42716297 clusterin isoform 1 [Homo sapiens] 5: gi|42740907 clusterin isoform 2 [Homo sapiens]	48772.1	69	100	3	3	ELDESLQVAER	55	644.901	1287.79	1287.63	122.553	Q-STAR
								ASSIIDELFQDR	49	697.427	1392.84	1392.69	108.497	Q-STAR
								EIQNAVNGVK	36	536.342	1070.67	1070.57	91.7005	Q-STAR	Carbamidomethyl (C)"(gi|4557325)
66	3038	1: gi|364011 apolipoprotein E mutant E3K 2: gi|4557325 apolipoprotein E precursor [Homo sapiens]	36130.8	97	100	7	7	LGADMEDVCGR	62	611.81	1221.6	1221.51	76.1671	Q-STAR
								GEVQAMLGQSTEELR	54	824.462	1646.91	1646.79	70.7569	Q-STAR
								LDEVKEQVAEVR	50	472.316	1413.93	1413.75	127.215	Q-STAR
								LEEQAQQIR	43	557.85	1113.69	1113.58	97.3628	Q-STAR
								LQAEAFQAR	40	517.321	1032.63	1032.54	90.2633	Q-STAR
								SELEEQLTPVAEETR	31	865.999	1729.98	1729.84	84.8964	Q-STAR	"(gi|178853) (gi|364011) (gi|4557325)
67	3301	1: gi|178849 apolipoprotein E 2: gi|178853 apolipoprotein E 3: gi|364011 apolipoprotein E mutant E3K 4: gi|4557325 apolipoprotein E precursor [Homo sapiens]	36187.8	104	100	5	5	SELEEQLTPVAEETR	76	866.026	1730.04	1729.84	116.31	Q-STAR	Oxidation (M)
								AATVGSLAGQPLQER	52	749.483	1496.95	1496.79	104.477	Q-STAR
								GEVQAMLGQSTEELR	40	555.345	1663.01	1662.79	135.94	Q-STAR
								WELALGR	38	422.809	843.604	843.46	170.921	Q-STAR
								LGPLVEQGR	33	484.827	967.64	967.545	98.4357	Q-STAR	"(gi|178853) (gi|364011) (gi|4557325)
68	3182	1: gi|178849 apolipoprotein E 2: gi|178853 apolipoprotein E 3: gi|364011 apolipoprotein E mutant E3K 4: gi|4557325 apolipoprotein E precursor [Homo sapiens]	36187.8	142	100	4	4	SWFEPLVEDMQR	86	768.908	1535.8	1535.71	61.5723	Q-STAR
								WVQTLSEQVQEELLSSQVTQELR	66	910.874	2729.6	2729.39	78.3315	Q-STAR
								SELEEQLTPVAEETR	52	865.988	1729.96	1729.84	72.0895	Q-STAR
								AYKSELEEQLTPVAEETR	35	698.398	2092.17	2092.03	66.8331	Q-STAR	"(gi|178853) (gi|364011) (gi|4557325)
68	3182	1: gi|178849 apolipoprotein E 2: gi|178853 apolipoprotein E 3: gi|364011 apolipoprotein E mutant E3K 4: gi|4557325 apolipoprotein E precursor [Homo sapiens]	36187.8	212	100	8	6	AATVGSLAGQPLQER	76	749.41	1496.81	1496.79	7.21609	LTQ-FT
								LGPLVEQGR	72	484.78	967.545	967.545	0.433055	LTQ-FT
								LQAEAFQAR	63	517.28	1032.55	1032.54	9.92315	LTQ-FT
								LAVYQAGAR	61	474.77	947.525	947.519	7.00144	LTQ-FT
								AKLEEQAQQIR	41	438.58	1312.72	1312.71	6.32508	LTQ-FT
								VQAAVGTSAAPVPSDNH	33	810.91	1619.81	1619.79	9.35306	LTQ-FT	"(gi|180620) (gi|32891795) (gi|42740907) (gi|338057) (gi|42716297)
68	3182	1: gi|178855 apolipoprotein J precursor 2: gi|180620 complement cytolysis inhibitor precursor 3: gi|32891795 clusterin (complement lysis inhibitor, SP-40,40, sulfated glycoprotein 2, testosterone-repressed pr 4: gi|42740907 clusterin isoform 2 [Homo sapiens] 5: gi|338057 sulfated glycoprotein-2 6: gi|42716297 clusterin isoform 1 [Homo sapiens]	48772.1	195	100	8	8	ASSIIDELFQDR	85	697.395	1392.77	1392.69	61.8595	Q-STAR
								ELDESLQVAER	78	644.845	1287.68	1287.63	35.2407	Q-STAR
								LFDSDPITVTVPVEVSR	72	937.551	1873.09	1872.98	55.599	Q-STAR
								TLLSNLEEAK	54	559.339	1116.66	1116.6	54.5628	Q-STAR
								VTTVASHTSDSDVPSGVTEVVVK	35	772.117	2313.33	2313.17	68.2561	Q-STAR
								VTTVASHTSDSDVPSGVTEVVVK	35	772.11	2313.31	2313.17	59.7989	Q-STAR
								VTTVASHTSDSDVPSGVTEVVVK	34	772.119	2313.33	2313.17	70.9563	Q-STAR
								VTTVASHTSDSDVPSGVTEVVVK	32	772.112	2313.31	2313.17	62.0503	Q-STAR	"(gi|553181) (gi|4557287) (gi|15079348) (gi|37790798) (gi|62089124) (gi|62897155)
69	2443	1: gi|532198 angiotensinogen 2: gi|553181 angiotensinogen 3: gi|4557287 angiotensinogen preproprotein [Homo sapiens] 4: gi|15079348 Angiotensinogen (serpin peptidase inhibitor, clade A, member 8) [Homo sapiens] 5: gi|37790798 angiotensinogen (serine (or cysteine) proteinase inhibitor, clade A (alpha-1 antiproteinase, antitr 6: gi|62089124 angiotensinogen precursor variant [Homo sapiens] 7: gi|628…	53121.5	137	100	8	6	SLDFTELDVAAEK	67	719.42	1436.83	1436.7	85.0858	Q-STAR
								VLSALQAVQGLLVAQGR	55	575.072	1722.19	1722.02	103.596	Q-STAR
								DPTFIPAPIQAK	54	649.42	1296.83	1296.71	91.3328	Q-STAR
								FMQAVTGWK	48	534.309	1066.6	1066.53	71.3297	Q-STAR
								ALQDQLVLVAAK	41	634.93	1267.85	1267.75	75.9921	Q-STAR
								ADSQAQLLLSTVVGVFTAPGLHLK	36	822.539	2464.59	2464.37	91.5524	Q-STAR	"(gi|532198) (gi|4557287) (gi|15079348) (gi|37790798) (gi|62089124) (gi|62897155)
69	2443	1: gi|553181 angiotensinogen 2: gi|532198 angiotensinogen 3: gi|4557287 angiotensinogen preproprotein [Homo sapiens] 4: gi|15079348 Angiotensinogen (serpin peptidase inhibitor, clade A, member 8) [Homo sapiens] 5: gi|37790798 angiotensinogen (serine (or cysteine) proteinase inhibitor, clade A (alpha-1 antiproteinase, antitr 6: gi|62089124 angiotensinogen precursor variant [Homo sapiens] 7: gi|628…	36549.9	129	100	6	6	FMQAVTGWK	66	534.305	1066.6	1066.53	63.9881	Q-STAR
								SLDFTELDVAAEK	63	719.397	1436.78	1436.7	53.5163	Q-STAR
								DPTFIPAPIQAK	52	649.396	1296.78	1296.71	53.824	Q-STAR
								ALQDQLVLVAAK	35	634.915	1267.81	1267.75	51.1244	Q-STAR
								QPFVQGLALYTPVVLPR	35	633.424	1897.25	1897.08	87.7526	Q-STAR
								ADSQAQLLLSTVVGVFTAPGLHLK	31	822.522	2464.55	2464.37	71.527	Q-STAR	"(gi|9665262) (gi|62088004)
70	2493	1: gi|7512417 extracellular protein - human 2: gi|9665262 EGF-containing fibulin-like extracellular matrix protein 1 precursor [Homo sapiens] 3: gi|62088004 EGF-containing fibulin-like extracellular matrix protein 1 isoform b variant [Homo sapiens]	43108.8	119	100	6	6	EHIVDLEMLTVSSIGTFR	64	683.083	2046.23	2046.05	88.6486	Q-STAR	Oxidation (M)
								SGNENGEFYLR	56	643.337	1284.66	1284.57	66.6167	Q-STAR
								EHIVDLEMLTVSSIGTFR	46	688.413	2062.22	2062.04	86.4178	Q-STAR
								QTSPVSAMLVLVK	42	686.935	1371.86	1371.78	55.1838	Q-STAR
								ELPQSIVYK	35	538.837	1075.66	1075.59	62.8324	Q-STAR
								NNFVIR	35	381.741	761.467	761.418	64.4311	Q-STAR	"(gi|6429043)
70	2493	1: gi|4503009 carboxypeptidase E precursor [Homo sapiens] 2: gi|6429043 carboxypeptidase E [Homo sapiens]	53117.1	98	100	7	6	LTASAPGYLAITK	51	653.411	1304.81	1304.73	57.0086	Q-STAR
								LQQEDGISFEYHR	46	541.3	1620.88	1620.75	76.5255	Q-STAR
								LLIPGNYK	41	459.301	916.588	916.538	54.0228	Q-STAR
								ELLVIELSDNPGVHEPGEPEFK	40	816.813	2447.42	2447.22	79.3275	Q-STAR	Oxidation (M)
								IVYVNEK	34	432.775	863.535	863.475	68.6852	Q-STAR
								IHIMPSLNPDGFEK	32	538.65	1612.93	1612.79	85.3446	Q-STAR	"(gi|532198) (gi|4557287)
71	5621	1: gi|553181 angiotensinogen 2: gi|532198 angiotensinogen 3: gi|4557287 angiotensinogen preproprotein [Homo sapiens]	36549.9	279	100	9	10	VLSALQAVQGLLVAQGR	95	575.076	1722.21	1722.02	110.725	Q-STAR
								SLDFTELDVAAEK	75	719.41	1436.81	1436.7	71.5228	Q-STAR
								LQAILGVPWK	68	562.885	1123.76	1123.68	71.4112	Q-STAR	2 Oxidation (M)
								ALQDQLVLVAAK	68	634.892	1267.77	1267.75	15.4423	Q-STAR
								AAMVGMLANFLGFR	51	765.452	1528.89	1528.75	88.9261	Q-STAR
								FMQAVTGWK	51	534.324	1066.63	1066.53	99.9947	Q-STAR
								DPTFIPAPIQAK	45	649.42	1296.83	1296.71	91.0429	Q-STAR	Oxidation (M)
								LDTEDKLR	42	495.304	988.594	988.519	75.691	Q-STAR
								FMQAVTGWK	40	542.321	1082.63	1082.52	98.3888	Q-STAR
								ADSQAQLLLSTVVGVFTAPGLHLK	33	822.58	2464.72	2464.37	141.85	Q-STAR	"(gi|553181) (gi|4557287) (gi|15079348) (gi|37790798) (gi|62089124) (gi|62897155)
71	5621	1: gi|532198 angiotensinogen 2: gi|553181 angiotensinogen 3: gi|4557287 angiotensinogen preproprotein [Homo sapiens] 4: gi|15079348 Angiotensinogen (serpin peptidase inhibitor, clade A, member 8) [Homo sapiens] 5: gi|37790798 angiotensinogen (serine (or cysteine) proteinase inhibitor, clade A (alpha-1 antiproteinase, antitr 6: gi|62089124 angiotensinogen precursor variant [Homo sapiens] 7: gi|628…	53121.5	225	100	8	8	SLDFTELDVAAEK	75	719.425	1436.84	1436.7	91.57	Q-STAR
								AAMVGMLANFLGFR	67	749.456	1496.9	1496.76	89.4631	Q-STAR
								VLSALQAVQGLLVAQGR	63	575.09	1722.25	1722.02	135.643	Q-STAR
								DPTFIPAPIQAK	56	649.414	1296.81	1296.71	81.9321	Q-STAR
								ALQDQLVLVAAK	48	634.94	1267.86	1267.75	90.3735	Q-STAR
								FMQAVTGWK	46	534.326	1066.64	1066.53	103.147	Q-STAR
								LQAILGVPWK	38	562.893	1123.77	1123.68	85.8015	Q-STAR
								ADSQAQLLLSTVVGVFTAPGLHLK	32	822.576	2464.71	2464.37	136.899	Q-STAR	"(gi|553181) (gi|4557287) (gi|15079348) (gi|37790798) (gi|62089124) (gi|62897155)
72	5624	1: gi|532198 angiotensinogen 2: gi|553181 angiotensinogen 3: gi|4557287 angiotensinogen preproprotein [Homo sapiens] 4: gi|15079348 Angiotensinogen (serpin peptidase inhibitor, clade A, member 8) [Homo sapiens] 5: gi|37790798 angiotensinogen (serine (or cysteine) proteinase inhibitor, clade A (alpha-1 antiproteinase, antitr 6: gi|62089124 angiotensinogen precursor variant [Homo sapiens] 7: gi|628…	53121.5	243	100	11	11	ALQDQLVLVAAK	71	634.929	1267.84	1267.75	73.1177	Q-STAR
								AAMVGMLANFLGFR	66	749.455	1496.9	1496.76	88.1121	Q-STAR
								SLDFTELDVAAEK	64	719.393	1436.77	1436.7	47.5916	Q-STAR
								LQAILGVPWK	57	562.905	1123.79	1123.68	106.142	Q-STAR	Pyro-glu (N-term Q)
								DPTFIPAPIQAK	57	649.413	1296.81	1296.71	80.1167	Q-STAR
								QPFVQGLALYTPVVLPR	55	941.103	1880.19	1880.06	72.0862	Q-STAR	Oxidation (M)
								QPFVQGLALYTPVVLPR	47	949.617	1897.22	1897.08	71.8171	Q-STAR
								FMQAVTGWK	45	542.314	1082.61	1082.52	85.1955	Q-STAR
								FMQAVTGWK	44	534.322	1066.63	1066.53	96.6567	Q-STAR
								ADSQAQLLLSTVVGVFTAPGLHLK	33	822.552	2464.63	2464.37	107.781	Q-STAR
								LDTEDKLR	31	495.309	988.604	988.519	85.9508	Q-STAR	"(gi|532198) (gi|4557287) (gi|15079348) (gi|37790798) (gi|62089124) (gi|62897155)
72	5624	1: gi|553181 angiotensinogen 2: gi|532198 angiotensinogen 3: gi|4557287 angiotensinogen preproprotein [Homo sapiens] 4: gi|15079348 Angiotensinogen (serpin peptidase inhibitor, clade A, member 8) [Homo sapiens] 5: gi|37790798 angiotensinogen (serine (or cysteine) proteinase inhibitor, clade A (alpha-1 antiproteinase, antitr 6: gi|62089124 angiotensinogen precursor variant [Homo sapiens] 7: gi|628…	36549.9	240	100	11	11	SLDFTELDVAAEK	74	719.412	1436.81	1436.7	74.2387	Q-STAR
								VLSALQAVQGLLVAQGR	65	575.076	1722.21	1722.02	111.145	Q-STAR
								DPTFIPAPIQAK	56	649.422	1296.83	1296.71	93.1359	Q-STAR
								FMQAVTGWK	54	534.331	1066.65	1066.53	112.786	Q-STAR
								ALQDQLVLVAAK	54	634.901	1267.79	1267.75	28.9781	Q-STAR
								ADSQAQLLLSTVVGVFTAPGLHLK	47	822.557	2464.65	2464.37	113.235	Q-STAR
								ADSQAQLLLSTVVGVFTAPGLHLK	40	822.562	2464.66	2464.37	119.886	Q-STAR
								SLDFTELDVAAEKIDR	35	608.052	1821.14	1820.92	120.685	Q-STAR
								LDTEDKLR	35	495.299	988.583	988.519	64.804	Q-STAR
								QPFVQGLALYTPVVLPR	32	633.444	1897.31	1897.08	120.226	Q-STAR	"(gi|532198) (gi|4557287) (gi|15079348) (gi|37790798) (gi|62089124) (gi|62897155)
73	5622	1: gi|553181 angiotensinogen 2: gi|532198 angiotensinogen 3: gi|4557287 angiotensinogen preproprotein [Homo sapiens] 4: gi|15079348 Angiotensinogen (serpin peptidase inhibitor, clade A, member 8) [Homo sapiens] 5: gi|37790798 angiotensinogen (serine (or cysteine) proteinase inhibitor, clade A (alpha-1 antiproteinase, antitr 6: gi|62089124 angiotensinogen precursor variant [Homo sapiens] 7: gi|628…	36549.9	378	100	12	13	SLDFTELDVAAEK	75	719.386	1436.76	1436.7	37.8331	Q-STAR
								VLSALQAVQGLLVAQGR	75	575.079	1722.22	1722.02	116.131	Q-STAR
								ALQDQLVLVAAK	72	634.92	1267.83	1267.75	59.3216	Q-STAR
								SLDFTELDVAAEKIDR	64	608.046	1821.12	1820.92	110.238	Q-STAR
								QPFVQGLALYTPVVLPR	59	949.677	1897.34	1897.08	135.241	Q-STAR	2 Oxidation (M)
								LQAILGVPWK	59	562.896	1123.78	1123.68	90.9934	Q-STAR
								AAMVGMLANFLGFR	54	765.457	1528.9	1528.75	96.2301	Q-STAR	Oxidation (M)
								DPTFIPAPIQAK	53	649.402	1296.79	1296.71	62.8823	Q-STAR
								FMQAVTGWK	53	542.315	1082.62	1082.52	86.1156	Q-STAR
								FMQAVTGWK	51	534.322	1066.63	1066.53	96.5742	Q-STAR
								ANAGKPKDPTFIPAPIQAK	51	655.45	1963.33	1963.09	121.939	Q-STAR
								LDTEDKLR	39	495.308	988.602	988.519	84.2027	Q-STAR	"(gi|553181) (gi|4557287) (gi|15079348) (gi|37790798) (gi|62089124) (gi|62897155)
74	5625	1: gi|532198 angiotensinogen 2: gi|553181 angiotensinogen 3: gi|4557287 angiotensinogen preproprotein [Homo sapiens] 4: gi|15079348 Angiotensinogen (serpin peptidase inhibitor, clade A, member 8) [Homo sapiens] 5: gi|37790798 angiotensinogen (serine (or cysteine) proteinase inhibitor, clade A (alpha-1 antiproteinase, antitr 6: gi|62089124 angiotensinogen precursor variant [Homo sapiens] 7: gi|628…	53121.5	302	100	11	11	SLDFTELDVAAEK	80	719.418	1436.82	1436.7	82.0121	Q-STAR
								VLSALQAVQGLLVAQGR	75	575.084	1722.23	1722.02	124.688	Q-STAR	Pyro-glu (N-term Q)
								ALQDQLVLVAAK	73	634.921	1267.83	1267.75	60.478	Q-STAR
								QPFVQGLALYTPVVLPR	61	941.12	1880.22	1880.06	89.7878	Q-STAR
								ADSQAQLLLSTVVGVFTAPGLHLK	61	822.589	2464.74	2464.37	152.247	Q-STAR
								AAMVGMLANFLGFR	59	749.6	1497.19	1496.76	282.159	Q-STAR
								LQAILGVPWK	51	562.891	1123.77	1123.68	81.8341	Q-STAR	Oxidation (M)
								QPFVQGLALYTPVVLPR	50	633.438	1897.29	1897.08	110.988	Q-STAR
								FMQAVTGWK	45	542.304	1082.59	1082.52	66.0532	Q-STAR
								LDTEDKLR	41	495.302	988.59	988.519	72.12	Q-STAR
								DPTFIPAPIQAK	41	649.402	1296.79	1296.71	62.3348	Q-STAR	"(gi|532198) (gi|4557287) (gi|15079348) (gi|37790798) (gi|62089124) (gi|62897155)
74	5625	1: gi|553181 angiotensinogen 2: gi|532198 angiotensinogen 3: gi|4557287 angiotensinogen preproprotein [Homo sapiens] 4: gi|15079348 Angiotensinogen (serpin peptidase inhibitor, clade A, member 8) [Homo sapiens] 5: gi|37790798 angiotensinogen (serine (or cysteine) proteinase inhibitor, clade A (alpha-1 antiproteinase, antitr 6: gi|62089124 angiotensinogen precursor variant [Homo sapiens] 7: gi|628…	36549.9	208	100	8	8	SLDFTELDVAAEK	74	719.42	1436.83	1436.7	84.7851	Q-STAR
								ALQDQLVLVAAK	64	634.918	1267.82	1267.75	56.6886	Q-STAR
								DPTFIPAPIQAK	62	649.42	1296.82	1296.71	90.045	Q-STAR
								SLDFTELDVAAEKIDR	56	608.053	1821.14	1820.92	121.196	Q-STAR
								FMQAVTGWK	42	534.318	1066.62	1066.53	87.7868	Q-STAR
								LDTEDKLR	39	495.294	988.574	988.519	55.746	Q-STAR
								VLSALQAVQGLLVAQGR	38	575.076	1722.21	1722.02	111.814	Q-STAR
								ADSQAQLLLSTVVGVFTAPGLHLK	36	822.582	2464.72	2464.37	144.339	Q-STAR
75	5627	no data
76	2849	1: gi|4557325 apolipoprotein E precursor [Homo sapiens]	36132	78	94	2	2	LGPLVEQGR	25	484.811	967.608	967.545	65.1133	Q-STAR
								LQAEAFQAR	18	517.31	1032.61	1032.54	68.5691	Q-STAR
								AATVGSLAGQPLQER	35	749.439	1496.86	1496.79	46.0317	Q-STAR	"(gi|2098255) (gi|2098257) (gi|3891560) (gi|4507725) (gi|62738386) (gi|73535906) (gi|55669575)
77	5009	1: gi|443295 Chain A, Transthyretin (Formerly Prealbumin) 2: gi|2098255 Chain A, Tertiary Structures Of Three Amyloidogenic Transthyretin Variants And Implications For Amy 3: gi|2098257 Chain A, Tertiary Structures Of Three Amyloidogenic Transthyretin Variants And Implications For Amy 4: gi|3891560 Chain A, Tertiary Structures Of Three Amyloidogenic Transthyretin Variants And Implications For Amy…	13752.9	332	100	11	11	YTIAALLSPYSYSTTAVVTNPKE	79	830.492	2488.45	2488.27	72.3389	Q-STAR
								RYTIAALLSPYSYSTTAVVTNPKE	77	882.523	2644.55	2644.37	65.4064	Q-STAR
								AADDTWEPFASGK	55	697.861	1393.71	1393.61	66.2959	Q-STAR
								GSPAINVAVHVFR	55	456.291	1365.85	1365.75	73.304	Q-STAR
								GSPAINVAVHVFRK	48	498.999	1493.97	1493.85	85.7786	Q-STAR
								YTIAALLSPYSYSTTAVVTNPK	45	787.488	2359.44	2359.23	89.6508	Q-STAR
								TSESGELHGLTTEEEFVEGIYKVEIDTK	45	785.932	3139.7	3139.51	61.3163	Q-STAR
								RYTIAALLSPYSYSTTAVVTNPK	42	839.509	2515.5	2515.33	68.5886	Q-STAR
								ALGISPFHEHAEVVFTANDSGPR	42	613.609	2450.41	2450.2	85.9604	Q-STAR
								ALGISPFHEHAEVVFTANDSGPRR	37	652.635	2606.51	2606.3	81.9027	Q-STAR
								TSESGELHGLTTEEEFVEGIYK	37	819.11	2454.31	2454.14	67.384	Q-STAR	"(gi|2098255) (gi|2098257) (gi|3891560) (gi|4507725) (gi|62738386) (gi|73535906) (gi|55669575)
78	5033	1: gi|443295 Chain A, Transthyretin (Formerly Prealbumin) 2: gi|2098255 Chain A, Tertiary Structures Of Three Amyloidogenic Transthyretin Variants And Implications For Amy 3: gi|2098257 Chain A, Tertiary Structures Of Three Amyloidogenic Transthyretin Variants And Implications For Amy 4: gi|3891560 Chain A, Tertiary Structures Of Three Amyloidogenic Transthyretin Variants And Implications For Amy…	13752.9	211	100	7	7	RYTIAALLSPYSYSTTAVVTNPKE	71	882.532	2644.57	2644.37	74.843	Q-STAR
								YTIAALLSPYSYSTTAVVTNPKE	68	830.496	2488.47	2488.27	77.6028	Q-STAR
								AADDTWEPFASGK	63	697.866	1393.72	1393.61	73.2792	Q-STAR
								YTIAALLSPYSYSTTAVVTNPK	47	787.475	2359.4	2359.23	72.5147	Q-STAR
								GSPAINVAVHVFR	38	456.297	1365.87	1365.75	85.6027	Q-STAR
								TSESGELHGLTTEEEFVEGIYKVEIDTK	37	785.95	3139.77	3139.51	82.991	Q-STAR
								ALGISPFHEHAEVVFTANDSGPR	35	613.612	2450.42	2450.2	89.9095	Q-STAR	"(gi|2098255) (gi|2098257) (gi|3891560) (gi|4507725) (gi|62738386) (gi|73535906) (gi|55669575)
79	5078	1: gi|443295 Chain A, Transthyretin (Formerly Prealbumin) 2: gi|2098255 Chain A, Tertiary Structures Of Three Amyloidogenic Transthyretin Variants And Implications For Amy 3: gi|2098257 Chain A, Tertiary Structures Of Three Amyloidogenic Transthyretin Variants And Implications For Amy 4: gi|3891560 Chain A, Tertiary Structures Of Three Amyloidogenic Transthyretin Variants And Implications For Amy…	13752.9	277	100	9	9	RYTIAALLSPYSYSTTAVVTNPKE	59	882.526	2644.56	2644.37	68.2857	Q-STAR
								YTIAALLSPYSYSTTAVVTNPK	57	787.477	2359.41	2359.23	75.2169	Q-STAR
								AADDTWEPFASGK	56	697.866	1393.72	1393.61	74.2135	Q-STAR
								TSESGELHGLTTEEEFVEGIYK	55	819.111	2454.31	2454.14	68.5343	Q-STAR
								YTIAALLSPYSYSTTAVVTNPKE	54	830.488	2488.44	2488.27	68.0781	Q-STAR
								GSPAINVAVHVFR	48	456.295	1365.86	1365.75	82.5494	Q-STAR
								GSPAINVAVHVFRK	46	498.996	1493.97	1493.85	80.5089	Q-STAR
								ALGISPFHEHAEVVFTANDSGPR	40	613.61	2450.41	2450.2	87.0069	Q-STAR
								ALGISPFHEHAEVVFTANDSGPRR	36	652.635	2606.51	2606.3	81.4346	Q-STAR
80	2958	1: gi|4504067 aspartate aminotransferase 1 [Homo sapiens]	46219	56	77	1	1	LALGDDSPALK	18	550.344	1098.67	1098.59	73.6397	Q-STAR
								VGGVQSLGGTGALR	37	636.41	1270.8	1270.7	82.8678	Q-STAR	"(gi|55962673)
															Oxidation (M)
81	3657	1: gi|32171249 prostaglandin H2 D-isomerase [Homo sapiens] 2: gi|55962673 prostaglandin D2 synthase 21kDa (brain) [Homo sapiens]	21015.3	52	100	5	5	MATLYSR	42	421.26	840.506	840.416	107.031	Q-STAR
								TMLLQPAGSLGSYSYR	39	880.53	1759.05	1758.86	104.776	Q-STAR
								AQGFTEDTIVFLPQTDK	35	955.544	1909.07	1908.95	66.676	Q-STAR
								GPGEDFR	31	389.216	776.418	776.345	93.6774	Q-STAR
82	3867	no data													"(gi|364011) (gi|4557325)
83	3176	1: gi|178849 apolipoprotein E 2: gi|364011 apolipoprotein E mutant E3K 3: gi|4557325 apolipoprotein E precursor [Homo sapiens]	36187.8	143	100	12	10	SELEEQLTPVAEETR	76	866.008	1730	1729.84	94.7771	Q-STAR
								SWFEPLVEDMQR	60	768.93	1535.85	1535.71	89.868	Q-STAR	Carbamidomethyl (C)
								LGPLVEQGR	55	484.834	967.654	967.545	113.065	Q-STAR
								LGADMEDVCGR	44	611.9	1221.79	1221.51	224.053	Q-STAR
								AATVGSLAGQPLQER	42	749.478	1496.94	1496.79	97.5839	Q-STAR
								LAVYQAGAR	41	474.805	947.595	947.519	80.1652	Q-STAR
								VQAAVGTSAAPVPSDNH	39	810.982	1619.95	1619.79	98.6436	Q-STAR
								AKLEEQAQQIR	38	657.401	1312.79	1312.71	59.6621	Q-STAR
								GEVQAMLGQSTEELR	35	824.489	1646.96	1646.79	102.952	Q-STAR	"(gi|178855) (gi|180620) (gi|32891795) (gi|42716297) (gi|42740907) (gi|338057)
83	3176	1: gi|338305 'SP40,40' 2: gi|178855 apolipoprotein J precursor 3: gi|180620 complement cytolysis inhibitor precursor 4: gi|32891795 clusterin (complement lysis inhibitor, SP-40,40, sulfated glycoprotein 2, testosterone-repressed pr 5: gi|42716297 clusterin isoform 1 [Homo sapiens] 6: gi|42740907 clusterin isoform 2 [Homo sapiens] 7: gi|338057 sulfated glycoprotein-2	36712	72	100	2	2	ELDESLQVAER	56	644.884	1287.75	1287.63	95.0358	Q-STAR
								ASSIIDELFQDR	49	697.428	1392.84	1392.69	110.284	Q-STAR	"(gi|4557325)
83	3176	1: gi|364011 apolipoprotein E mutant E3K 2: gi|4557325 apolipoprotein E precursor [Homo sapiens]	36130.8	123	100	13	10	LQAEAFQAR	56	517.354	1032.69	1032.54	153.515	Q-STAR	Carbamidomethyl (C)
								SELEEQLTPVAEETR	55	865.999	1729.98	1729.84	84.2524	Q-STAR
								LGADMEDVCGR	53	611.838	1221.66	1221.51	121.915	Q-STAR
								LGPLVEQGR	41	484.834	967.653	967.545	111.293	Q-STAR
								AATVGSLAGQPLQER	36	749.473	1496.93	1496.79	90.8294	Q-STAR
								GEVQAMLGQSTEELR	36	824.447	1646.88	1646.79	52.8336	Q-STAR
								WELALGR	36	422.777	843.539	843.46	93.203	Q-STAR
								DRLDEVKEQVAEVR	34	562.74	1685.2	1684.87	192.548	Q-STAR
								AKLEEQAQQIR	33	657.417	1312.82	1312.71	83.0412	Q-STAR	Carbamidomethyl (C)"(gi|4557325)
83	3176	1: gi|364011 apolipoprotein E mutant E3K 2: gi|4557325 apolipoprotein E precursor [Homo sapiens]	36130.8	236	100	17	17	LGADMEDVCGR	69	611.819	1221.62	1221.51	91.1796	Q-STAR
								LEEQAQQIR	57	557.846	1113.68	1113.58	89.3992	Q-STAR
								LAVYQAGAR	53	474.807	947.599	947.519	84.5872	Q-STAR
								SELEEQLTPVAEETR	51	866.005	1729.99	1729.84	91.2358	Q-STAR
								AATVGSLAGQPLQER	51	749.468	1496.92	1496.79	84.9529	Q-STAR
								SWFEPLVEDMQR	50	768.926	1535.84	1535.71	83.9137	Q-STAR
								WVQTLSEQVQEELLSSQVTQELR	50	911.1	2730.28	2729.39	326.462	Q-STAR
								LQAEAFQAR	48	517.36	1032.71	1032.54	165.761	Q-STAR
								AKLEEQAQQIR	47	657.409	1312.8	1312.71	71.6007	Q-STAR	Oxidation (M)
								DRLDEVKEQVAEVR	43	562.712	1685.11	1684.87	142.219	Q-STAR
								GEVQAMLGQSTEELR	38	832.471	1662.93	1662.79	83.7383	Q-STAR
								ALMDETMK	36	469.783	937.552	937.425	135.164	Q-STAR
								AYKSELEEQLTPVAEETR	31	698.453	2092.34	2092.03	145.738	Q-STAR
								LGPLVEQGR	44	484.806	967.598	967.545	54.7582	Q-STAR
								EQVAEVR	43	415.765	829.515	829.429	103.817	Q-STAR
								GEVQAMLGQSTEELR	37	824.5	1646.99	1646.79	116.712	Q-STAR
								DRLDEVKEQVAEVR	34	562.699	1685.07	1684.87	118.787	Q-STAR	Carbamidomethyl (C)"(gi|364011) (gi|4557325)
84	3228	1: gi|178849 apolipoprotein E 2: gi|364011 apolipoprotein E mutant E3K 3: gi|4557325 apolipoprotein E precursor [Homo sapiens]	36187.8	99	100	5	6	LGADMEDVCGR	75	611.801	1221.59	1221.51	62.3645	Q-STAR
								GEVQAMLGQSTEELR	43	824.43	1646.85	1646.79	32.0866	Q-STAR
								LQAEAFQAR	39	517.296	1032.58	1032.54	40.6049	Q-STAR
								SELEEQLTPVAEETR	36	866.1	1730.19	1729.84	201.448	Q-STAR
								AKLEEQAQQIR	33	657.407	1312.8	1312.71	67.6486	Q-STAR
								DRLDEVKEQVAEVR	31	562.729	1685.17	1684.87	173.419	Q-STAR	"(gi|443297) (gi|1827569) (gi|2098255) (gi|2098257) (gi|3891451) (gi|3891560) (gi|3891562) (gi|4507725) (gi|14719497) (gi|48145933) (gi|50513594) (gi|55669575) (gi|62738386) (gi|62738388) (gi|73535906) (gi|27065112) (gi|31615374)
84	3228	1: gi|443295 Chain A, Transthyretin (Formerly Prealbumin) 2: gi|443297 Chain A, Transthyretin (Formerly Prealbumin) Mutant With Ala 109 Replaced By Thr (A109t) 3: gi|1827569 Chain A, Transthyretin - V122I CARDIOMYOPATHIC MUTANT 4: gi|2098255 Chain A, Tertiary Structures Of Three Amyloidogenic Transthyretin Variants And Implications For Amy 5: gi|2098257 Chain A, Tertiary Structures Of Three Amylo…	13752.9	65	100	3	2	TSESGELHGLTTEEEFVEGIYK	49	819.3	2454.88	2454.14	299.263	Q-STAR
								AADDTWEPFASGK	38	697.885	1393.76	1393.61	101.311		Carbamidomethyl (C)"(gi|4557325)
84	3228	1: gi|364011 apolipoprotein E mutant E3K 2: gi|4557325 apolipoprotein E precursor [Homo sapiens]	36130.8	176	100	17	18	LGADMEDVCGR	61	611.826	1221.64	1221.51	102.436	Q-STAR
								AATVGSLAGQPLQER	60	749.456	1496.9	1496.79	68.7957	Q-STAR
								SELEEQLTPVAEETR	59	866.006	1730	1729.84	92.5792	Q-STAR
								LEEQAQQIR	58	557.841	1113.67	1113.58	81.3854	Q-STAR
								LQAEAFQAR	57	517.319	1032.62	1032.54	84.9172	Q-STAR
								LGPLVEQGR	49	484.826	967.638	967.545	96.0627	Q-STAR
								LAVYQAGAR	48	474.808	947.602	947.519	87.3988	Q-STAR
								AKLEEQAQQIR	41	657.427	1312.84	1312.71	99.383	Q-STAR
								LDEVKEQVAEVR	39	472.318	1413.93	1413.75	130.755	Q-STAR
								DRLDEVKEQVAEVR	38	562.709	1685.1	1684.87	136.559	Q-STAR
								ELQAAQAR	36	443.797	885.579	885.467	126.31	Q-STAR
								QQTEWQSGQR	31	624.316	1246.62	1246.57	38.1704	Q-STAR	Oxidation (M)
								DADDLQKR	31	480.786	959.557	959.467	93.3403	Q-STAR
								GEVQAMLGQSTEELR	31	832.48	1662.94	1662.79	94.0811	Q-STAR	"(gi|2098257) (gi|62738386) (gi|73535906)
84	3228	1: gi|443295 Chain A, Transthyretin (Formerly Prealbumin) 2: gi|2098257 Chain A, Tertiary Structures Of Three Amyloidogenic Transthyretin Variants And Implications For Amy 3: gi|62738386 Chain A, The X-Ray Crystallographic Structure Of The Amyloidogenic Variant Ttr Tyr78phe 4: gi|73535906 Chain A, Crystal Structure Of Human Transthyretin With Bound Iodide	13752.9	94	100	6	6	GSPAINVAVHVFR	45	456.307	1365.9	1365.75	106.969	Q-STAR
								YTIAALLSPYSYSTTAVVTNPKE	44	830.526	2488.56	2488.27	113.759	Q-STAR
								GPTGTGESK	43	417.24	832.466	832.393	87.9225	Q-STAR
								ALGISPFHEHAEVVFTANDSGPR	43	613.638	2450.52	2450.2	132.197	Q-STAR	Carbamidomethyl (C)
								GSPAINVAVHVFR	35	683.964	1365.91	1365.75	118.13	Q-STAR
								CPLMVK	32	374.232	746.449	746.382	89.3082	Q-STAR	"(gi|180620) (gi|32891795) (gi|42716297) (gi|42740907)
85	3074	1: gi|178855 apolipoprotein J precursor 2: gi|180620 complement cytolysis inhibitor precursor 3: gi|32891795 clusterin (complement lysis inhibitor, SP-40,40, sulfated glycoprotein 2, testosterone-repressed pr 4: gi|42716297 clusterin isoform 1 [Homo sapiens] 5: gi|42740907 clusterin isoform 2 [Homo sapiens]	48772.1	77	100	3	3	ELDESLQVAER	57	644.881	1287.75	1287.63	90.5764	Q-STAR
								ASSIIDELFQDR	49	697.436	1392.86	1392.69	121.896	Q-STAR
								LFDSDPITVTVPVEVSR	39	937.596	1873.18	1872.98	104.02	Q-STAR	"(gi|364011) (gi|4557325)
85	3074	1: gi|178853 apolipoprotein E 2: gi|364011 apolipoprotein E mutant E3K 3: gi|4557325 apolipoprotein E precursor [Homo sapiens]	36184.8	308	100	12	11	LAVYQAGAR	71	474.77	947.525	947.519	7.00144	LTQ-FT
								AATVGSLAGQPLQER	71	749.41	1496.81	1496.79	7.21609	LTQ-FT
								LGPLVEQGR	70	484.78	967.545	967.545	0.433055	LTQ-FT
								LQAEAFQAR	62	517.28	1032.55	1032.54	9.92315	LTQ-FT
								LEEQAQQIR	61	557.8	1113.59	1113.58	6.86346	LTQ-FT
								DADDLQKR	58	480.74	959.465	959.467	-1.83539	LTQ-FT
								VQAAVGTSAAPVPSDNH	51	810.91	1619.81	1619.79	9.35306	LTQ-FT
								AKLEEQAQQIR	42	438.58	1312.72	1312.71	6.32508	LTQ-FT
								AQAWGER	42	409.2	816.385	816.388	-2.90181	LTQ-FT
								QWAGLVEK	38	465.76	929.505	929.497	9.06189	LTQ-FT
								LASHLRK	36	412.76	823.505	823.503	3.22525	LTQ-FT	"(gi|180620) (gi|338057) (gi|338305) (gi|32891795) (gi|42716297) (gi|42740907) (gi|57997569)
85	3074	1: gi|178855 apolipoprotein J precursor 2: gi|180620 complement cytolysis inhibitor precursor 3: gi|338057 sulfated glycoprotein-2 4: gi|338305 'SP40,40' 5: gi|32891795 clusterin (complement lysis inhibitor, SP-40,40, sulfated glycoprotein 2, testosterone-repressed pr 6: gi|42716297 clusterin isoform 1 [Homo sapiens] 7: gi|42740907 clusterin isoform 2 [Homo sapiens] 8: gi|57997569 hypothetical pr…	48772.1	57	98	2	1	ELDESLQVAER	57	644.88	1287.74	1287.63	88.52	Q-STAR	"(gi|4557325)
															Carbamidomethyl (C); Oxidation (M)
86	5647	1: gi|364011 apolipoprotein E mutant E3K 2: gi|4557325 apolipoprotein E precursor [Homo sapiens]	36130.8	83	100	9	8	SELEEQLTPVAEETR	70	865.996	1729.98	1729.84	81.0279	Q-STAR
								LGADMEDVCGR	45	619.796	1237.58	1237.51	57.0623	Q-STAR
								ELQAAQAR	42	443.779	885.544	885.467	86.7125	Q-STAR
								DADDLQKR	41	480.783	959.55	959.467	86.7992	Q-STAR
								WELALGR	34	422.776	843.538	843.46	91.8941	Q-STAR
								LDEVKEQVAEVR	33	472.322	1413.94	1413.75	140.474	Q-STAR	"(gi|364011) (gi|4557325)
87	3224	1: gi|178849 apolipoprotein E 2: gi|364011 apolipoprotein E mutant E3K 3: gi|4557325 apolipoprotein E precursor [Homo sapiens]	36187.8	138	100	7	7	VQAAVGTSAAPVPSDNH	72	810.982	1619.95	1619.79	97.9534	Q-STAR	Carbamidomethyl (C)
								AATVGSLAGQPLQER	59	749.488	1496.96	1496.79	110.999	Q-STAR
								LGADMEDVCGR	50	611.83	1221.65	1221.51	110.136	Q-STAR
								SELEEQLTPVAEETR	40	866.1	1730.19	1729.84	201.448	Q-STAR
								LAVYQAGAR	35	474.838	947.661	947.519	149.675	Q-STAR
								GEVQAMLGQSTEELR	35	824.48	1646.95	1646.79	92.858	Q-STAR	"(gi|4557325)
															Carbamidomethyl (C)
87	3224	1: gi|364011 apolipoprotein E mutant E3K 2: gi|4557325 apolipoprotein E precursor [Homo sapiens]	36130.8	454	100	20	20	VQAAVGTSAAPVPSDNH	101	810.958	1619.9	1619.79	68.9707	Q-STAR
								LGADMEDVCGR	82	611.838	1221.66	1221.51	122.39	Q-STAR
								AATVGSLAGQPLQER	78	749.453	1496.89	1496.79	64.6067	Q-STAR
								AKLEEQAQQIR	69	657.399	1312.78	1312.71	56.007	Q-STAR
								SWFEPLVEDMQR	67	768.938	1535.86	1535.71	100.388	Q-STAR
								DADDLQKR	67	480.779	959.544	959.467	80.1205	Q-STAR
								GEVQAMLGQSTEELR	65	824.471	1646.93	1646.79	80.9148	Q-STAR	Carbamidomethyl (C); Oxidation (M)
								LDEVKEQVAEVR	61	472.311	1413.91	1413.75	117.479	Q-STAR
								LGADMEDVCGR	59	619.815	1237.62	1237.51	87.7401	Q-STAR
								SELEEQLTPVAEETR	56	865.988	1729.96	1729.84	72.1819	Q-STAR
								LGPLVEQGR	53	484.827	967.64	967.545	98.2394	Q-STAR
								LAVYQAGAR	49	474.786	947.557	947.519	40.3623	Q-STAR
								LEEQAQQIR	48	557.85	1113.69	1113.58	96.5923	Q-STAR
								QQTEWQSGQR	47	624.36	1246.7	1246.57	109.01	Q-STAR
								DRLDEVKEQVAEVR	45	562.7	1685.08	1684.87	120.578	Q-STAR
								AYKSELEEQLTPVAEETR	44	698.434	2092.28	2092.03	117.819	Q-STAR
								ALMDETMK	41	469.765	937.515	937.425	96.4387	Q-STAR
								QWAGLVEK	34	465.793	929.571	929.497	79.8313	Q-STAR
								EQVAEVR	31	415.76	829.505	829.429	91.5099	Q-STAR	"(gi|2098257) (gi|62738386) (gi|73535906)
87	3224	1: gi|443295 Chain A, Transthyretin (Formerly Prealbumin) 2: gi|2098257 Chain A, Tertiary Structures Of Three Amyloidogenic Transthyretin Variants And Implications For Amy 3: gi|62738386 Chain A, The X-Ray Crystallographic Structure Of The Amyloidogenic Variant Ttr Tyr78phe 4: gi|73535906 Chain A, Crystal Structure Of Human Transthyretin With Bound Iodide	13752.9	282	100	10	9	AADDTWEPFASGK	80	697.878	1393.74	1393.61	90.1031	Q-STAR
								RYTIAALLSPYSYSTTAVVTNPKE	74	882.563	2644.67	2644.37	110.575	Q-STAR
								TSESGELHGLTTEEEFVEGIYK	57	819.131	2454.37	2454.14	92.814	Q-STAR
								GSPAINVAVHVFR	47	456.297	1365.87	1365.75	86.455	Q-STAR
								ALGISPFHEHAEVVFTANDSGPR	47	613.624	2450.47	2450.2	110.642	Q-STAR
								KAADDTWEPFASGK	42	508.302	1521.89	1521.71	115.101	Q-STAR
								YTIAALLSPYSYSTTAVVTNPK	42	787.503	2359.49	2359.23	108.643	Q-STAR
								YTIAALLSPYSYSTTAVVTNPKE	37	830.519	2488.54	2488.27	105.376	Q-STAR
								VEIDTK	32	352.73	703.446	703.375	100.001	Q-STAR	"(gi|178855) (gi|180620) (gi|32891795) (gi|42740907) (gi|338057) (gi|42716297)
87	3224	1: gi|338305 'SP40,40' 2: gi|178855 apolipoprotein J precursor 3: gi|180620 complement cytolysis inhibitor precursor 4: gi|32891795 clusterin (complement lysis inhibitor, SP-40,40, sulfated glycoprotein 2, testosterone-repressed pr 5: gi|42740907 clusterin isoform 2 [Homo sapiens] 6: gi|338057 sulfated glycoprotein-2 7: gi|42716297 clusterin isoform 1 [Homo sapiens]	36712	83	100	2	2	ELDESLQVAER	68	644.892	1287.77	1287.63	107.931	Q-STAR
								RPHFFFPK	43	359.252	1074.73	1074.58	145.852	Q-STAR	"(gi|364011) (gi|4557325)
88	3126	1: gi|178849 apolipoprotein E 2: gi|364011 apolipoprotein E mutant E3K 3: gi|4557325 apolipoprotein E precursor [Homo sapiens]	36187.8	233	100	10	12	VQAAVGTSAAPVPSDNH	90	810.978	1619.94	1619.79	93.7072	Q-STAR
								GEVQAMLGQSTEELR	75	824.448	1646.88	1646.79	54.0796	Q-STAR
								SELEEQLTPVAEETR	63	865.997	1729.98	1729.84	82.8835	Q-STAR	Carbamidomethyl (C)
								AKLEEQAQQIR	57	657.6	1313.19	1312.71	362.288	Q-STAR
								LGADMEDVCGR	57	611.826	1221.64	1221.51	103.564	Q-STAR
								LAVYQAGAR	54	474.81	947.606	947.519	91.6098	Q-STAR
								LGPLVEQGR	46	484.832	967.649	967.545	107.324	Q-STAR
								DRLDEVKEQVAEVR	39	562.711	1685.11	1684.87	140.043	Q-STAR
								AATVGSLAGQPLQER	33	749.475	1496.94	1496.79	94.5681	Q-STAR
								WELALGR	33	422.78	843.545	843.46	100.95	Q-STAR	Carbamidomethyl (C)"(gi|4557325)
88	3126	1: gi|364011 apolipoprotein E mutant E3K 2: gi|4557325 apolipoprotein E precursor [Homo sapiens]	36130.8	122	100	12	11	LGADMEDVCGR	65	611.819	1221.62	1221.51	91.9721	Q-STAR
								AKLEEQAQQIR	51	657.423	1312.83	1312.71	92.8545	Q-STAR
								SELEEQLTPVAEETR	41	865.998	1729.98	1729.84	83.9761	Q-STAR
								AATVGSLAGQPLQER	40	749.474	1496.93	1496.79	93.3254	Q-STAR
								LDEVKEQVAEVR	37	472.305	1413.89	1413.75	104.69	Q-STAR
								LGPLVEQGR	36	484.851	967.687	967.545	146.839	Q-STAR
								DRLDEVKEQVAEVR	35	562.709	1685.11	1684.87	136.922	Q-STAR
								GEVQAMLGQSTEELR	34	824.474	1646.93	1646.79	84.6275	Q-STAR
								DADDLQKR	32	480.792	959.569	959.467	105.933	Q-STAR
								WELALGR	32	422.776	843.537	843.46	90.9503	Q-STAR	"(gi|180620) (gi|338057) (gi|338305) (gi|32891795) (gi|42716297) (gi|42740907) (gi|57997569)
88	3126	1: gi|178855 apolipoprotein J precursor 2: gi|180620 complement cytolysis inhibitor precursor 3: gi|338057 sulfated glycoprotein-2 4: gi|338305 'SP40,40' 5: gi|32891795 clusterin (complement lysis inhibitor, SP-40,40, sulfated glycoprotein 2, testosterone-repressed pr 6: gi|42716297 clusterin isoform 1 [Homo sapiens] 7: gi|42740907 clusterin isoform 2 [Homo sapiens] 8: gi|57997569 hypothetical pr…	48772.1	66	100	2	2	ASSIIDELFQDR	50	697.407	1392.8	1392.69	80.0315	Q-STAR
								ELDESLQVAER	50	644.909	1287.8	1287.63	134.667	Q-STAR
89	5297	no data													"(gi|178853) (gi|364011) (gi|4557325)
															Oxidation (M)
90	3083	1: gi|178849 apolipoprotein E 2: gi|178853 apolipoprotein E 3: gi|364011 apolipoprotein E mutant E3K 4: gi|4557325 apolipoprotein E precursor [Homo sapiens]	36187.8	77	100	4	4	SELEEQLTPVAEETR	69	866.053	1730.09	1729.84	147.107	Q-STAR
								GEVQAMLGQSTEELR	36	832.524	1663.03	1662.79	147.36	Q-STAR
								DRLDEVKEQVAEVR	34	562.727	1685.16	1684.87	168.236	Q-STAR
								LQAEAFQAR	32	517.341	1032.67	1032.54	127.343	Q-STAR	"(gi|46812315) (gi|51476396) (gi|66932947) (gi|62088808)
91	2218	1: gi|112911 Alpha-2-macroglobulin precursor (Alpha-2-M) 2: gi|46812315 alpha 2 macroglobulin [Homo sapiens] 3: gi|51476396 hypothetical protein [Homo sapiens] 4: gi|66932947 alpha-2-macroglobulin precursor [Homo sapiens] 5: gi|62088808 Alpha 2 macroglobulin variant [Homo sapiens]	163175	434	100	19	18	ALLAYAFALAGNQDK	83	783.457	1564.9	1564.82	48.0162	Q-STAR
								QQNAQGGFSSTQDTVVALHALSK	80	796.444	2386.31	2386.19	51.2009	Q-STAR	Carbamidomethyl (C)
								ALLAYAFALAGNQDKR	67	574.682	1721.02	1720.93	56.4632	Q-STAR
								VYDYYETDEFAIAEYNAPCSK	65	850.087	2547.24	2547.08	63.0487	Q-STAR
								SSGSLLNNAIK	62	552.332	1102.65	1102.6	45.7991	Q-STAR
								SASNMAIVDVK	60	567.829	1133.64	1133.58	60.9717	Q-STAR	Oxidation (M)
								FQVDNNNR	53	503.765	1005.52	1005.46	52.2138	Q-STAR
								LLLQQVSLPELPGEYSMK	51	687.743	2060.21	2060.09	58.3291	Q-STAR
								SSGSLLNNAIK	49	552.341	1102.67	1102.6	62.4053	Q-STAR
								AIGYLNTGYQR	48	628.358	1254.7	1254.64	51.9458	Q-STAR
								SSGSLLNNAIK	41	552.346	1102.68	1102.6	71.6889	Q-STAR	Oxidation (M)
								SLNEEAVKK	40	509.31	1016.61	1016.55	54.3456	Q-STAR
								MVSGFIPLKPTVK	40	478.307	1431.9	1431.82	57.8566	Q-STAR
								LLLQQVSLPELPGEYSMK	39	682.404	2044.19	2044.09	49.034	Q-STAR
								NQGNTWLTAFVLK	39	746.447	1490.88	1490.79	60.7115	Q-STAR
								MVSGFIPLKPTVK	37	472.97	1415.89	1415.82	46.669	Q-STAR
								SSGSLLNNAIK	33	552.335	1102.66	1102.6	52.0389	Q-STAR
								TEVSSNHVLIYLDK	32	539.991	1616.95	1616.84	68.5621	Q-STAR	"(gi|21361302) (gi|28375497)
91	2218	1: gi|425146 kallistatin 2: gi|21361302 serine (or cysteine) proteinase inhibitor, clade A (alpha-1 antiproteinase, antitrypsin), member 4 3: gi|28375497 unnamed protein product [Homo sapiens]	48525.2	147	100	8	6	FSISGSYVLDQILPR	59	565.677	1694.01	1693.9	62.5832	Q-STAR	Oxidation (M)
								FYYLIASETPGK	58	694.896	1387.78	1387.7	53.7795	Q-STAR
								DVLMVLVNYIYFK	55	817.003	1631.99	1631.86	79.1371	Q-STAR
								IAPANADFAFR	46	596.841	1191.67	1191.6	53.9533	Q-STAR
								LGFTDLFSK	46	514.31	1026.61	1026.54	65.6449	Q-STAR
								GFQHLLHTLNLPGHGLETR	39	535.818	2139.24	2139.13	51.62	Q-STAR	Carbamidomethyl (C)"(gi|6573461) (gi|543826)
															Carbamidomethyl (C)
91	2218	1: gi|4557327 apolipoprotein H precursor [Homo sapiens] 2: gi|6573461 Chain A, Crystal Structure Of Human Beta-2-Glycoprotein-I (Apolipoprotein-H) 3: gi|543826 Beta-2-glycoprotein 1 precursor (Beta-2-glycoprotein I) (Apolipoprotein H) (Apo-H) (B2GPI) (Beta(2)	38286.7	117	100	5	5	FICPLTGLWPINTLK	50	887.033	1772.05	1771.97	45.8761	Q-STAR
								VCPFAGILENGAVR	47	751.929	1501.84	1501.77	47.9134	Q-STAR	2 Carbamidomethyl (C)
								ATVVYQGER	47	511.798	1021.58	1021.52	60.8966	Q-STAR	Carbamidomethyl (C)
								KCSYTEDAQCIDGTIEVPK	42	738.715	2213.12	2213	57.188	Q-STAR
								TCPKPDDLPFSTVVPLK	36	638.71	1913.11	1913	58.3195	Q-STAR	Carbamidomethyl (C)"
92	2226	1: gi|6573461 Chain A, Crystal Structure Of Human Beta-2-Glycoprotein-I (Apolipoprotein-H)	36244.6	199	100	11	9	VCPFAGILENGAVR	66	751.93	1501.84	1501.77	48.9455	Q-STAR	Carbamidomethyl (C)
								ATVVYQGER	60	511.789	1021.56	1021.52	42.8509	Q-STAR	2 Carbamidomethyl (C)
								TCPKPDDLPFSTVVPLK	55	638.705	1913.09	1913	50.3765	Q-STAR	Carbamidomethyl (C)
								KCSYTEDAQCIDGTIEVPK	40	738.716	2213.13	2213	57.5554	Q-STAR	2 Carbamidomethyl (C)
								VSFFCK	38	394.221	786.427	786.373	67.8444	Q-STAR
								CSYTEDAQCIDGTIEVPK	36	695.9	2084.68	2084.9	-107.858	Q-STAR
								EHSSLAFWK	36	552.808	1103.6	1103.54	55.7868	Q-STAR	3 Carbamidomethyl (C)
								EHSSLAFWK	33	552.797	1103.58	1103.54	35.9217	Q-STAR
								CTEEGKWSPELPVCAPIICPPPSIPTFATLR	33	881.733	3522.9	3522.73	48.0533	Q-STAR	"(gi|224053) (gi|46812315) (gi|51476396) (gi|66932947) (gi|62088808)
92	2226	1: gi|112911 Alpha-2-macroglobulin precursor (Alpha-2-M) 2: gi|224053 macroglobulin alpha2 3: gi|46812315 alpha 2 macroglobulin [Homo sapiens] 4: gi|51476396 hypothetical protein [Homo sapiens] 5: gi|66932947 alpha-2-macroglobulin precursor [Homo sapiens] 6: gi|62088808 Alpha 2 macroglobulin variant [Homo sapiens]	163175	193	100	7	7	NQGNTWLTAFVLK	77	746.442	1490.87	1490.79	54.7804	Q-STAR
								ALLAYAFALAGNQDK	70	783.458	1564.9	1564.82	48.4214	Q-STAR
								AIGYLNTGYQR	60	628.356	1254.7	1254.64	49.4717	Q-STAR
								TEVSSNHVLIYLDK	57	539.985	1616.93	1616.84	56.5071	Q-STAR
								SSGSLLNNAIK	48	552.343	1102.67	1102.6	67.1868	Q-STAR
								SSGSLLNNAIK	41	552.328	1102.64	1102.6	38.4456	Q-STAR	"(gi|46812315) (gi|51476396) (gi|66932947) (gi|62088808)
93	2252	1: gi|112911 Alpha-2-macroglobulin precursor (Alpha-2-M) 2: gi|46812315 alpha 2 macroglobulin [Homo sapiens] 3: gi|51476396 hypothetical protein [Homo sapiens] 4: gi|66932947 alpha-2-macroglobulin precursor [Homo sapiens] 5: gi|62088808 Alpha 2 macroglobulin variant [Homo sapiens]	163175	188	100	10	10	NQGNTWLTAFVLK	65	746.436	1490.86	1490.79	46.2708	Q-STAR
								ALLAYAFALAGNQDK	60	783.452	1564.89	1564.82	40.8333	Q-STAR
								AIGYLNTGYQR	57	628.353	1254.69	1254.64	44.9126	Q-STAR
								ALLAYAFALAGNQDKR	49	574.687	1721.04	1720.93	66.0301	Q-STAR
								TEVSSNHVLIYLDK	47	539.984	1616.93	1616.84	55.3177	Q-STAR
								SSGSLLNNAIK	41	552.329	1102.64	1102.6	40.1561	Q-STAR
								LLLQQVSLPELPGEYSMK	41	682.418	2044.23	2044.09	68.6608	Q-STAR
								QQNAQGGFSSTQDTVVALHALSK	38	796.444	2386.31	2386.19	50.8678	Q-STAR
								SSGSLLNNAIK	36	552.338	1102.66	1102.6	57.7182	Q-STAR
								FQVDNNNR	33	503.755	1005.5	1005.46	33.128	Q-STAR	Carbamidomethyl (C)"(gi|6573461) (gi|543826)
															2 Carbamidomethyl (C)
93	2252	1: gi|4557327 apolipoprotein H precursor [Homo sapiens] 2: gi|6573461 Chain A, Crystal Structure Of Human Beta-2-Glycoprotein-I (Apolipoprotein-H) 3: gi|543826 Beta-2-glycoprotein 1 precursor (Beta-2-glycoprotein I) (Apolipoprotein H) (Apo-H) (B2GPI) (Beta(2)	38286.7	173	100	8	8	TDASDVKPC	62	496.746	991.478	991.428	50.3607	Q-STAR	Carbamidomethyl (C)
								KCSYTEDAQCIDGTIEVPK	59	738.714	2213.12	2213	55.7402	Q-STAR	Carbamidomethyl (C)
								FICPLTGLWPINTLK	54	887.034	1772.05	1771.97	47.8434	Q-STAR
								VCPFAGILENGAVR	51	751.931	1501.85	1501.77	51.0258	Q-STAR	Carbamidomethyl (C)
								ATVVYQGER	43	511.793	1021.57	1021.52	50.422	Q-STAR
								VSFFCK	42	394.218	786.422	786.373	61.2724	Q-STAR	Carbamidomethyl (C)
								KATVVYQGER	39	575.844	1149.67	1149.61	51.2137	Q-STAR
								TCPKPDDLPFSTVVPLK	33	638.705	1913.09	1913	50.654	Q-STAR
94	3255	no data													Pyro-glu (N-term Q)
95	3630	gi|178775 proapolipoprotein gi|229479 lipoprotein Gln I gi|4557321 lipoprotein Gln I gi|4557321 apolipoprotein A-I preproprotein [Homo sapiens]	28944	159	100	3	6	QKVEPLR	30.81	426.778	851.486	851.542	-65.1759	Q-STAR
								LSPLGEEMR	39.68	516.314	1030.51	1030.61	-99.0672	Q-STAR
								QGLLPVLESFK	8.76	615.893	1229.7	1229.77	-57.1651	Q-STAR
								DLATVYVDVLK	19.6	618.398	1234.68	1234.78	-81.3099	Q-STAR
								VQPYLDDFQK	36.43	626.875	1251.61	1251.74	-97.3049	Q-STAR
								VSFLSALEEYTK	24.76	693.911	1385.71	1385.81	-71.7993	Q-STAR
95	3630	gi|32171249 prostaglandin H2 D-isomerase [Homo sapiens] gi|55962673 prostaglandin D2 synthase 21kDa (brain) [Homo sapiens]	21015	132	100	2	4	MATLYSR	14.81	421.261	840.416	840.507	-107.792	Q-STAR	Oxidation (M)
								MATLYSR	14.38	421.265	840.416	840.515	-117.785	Q-STAR
								TMLLQPAGSLGSYSYR	43.7	880.517	1758.86	1759.02	-90.3912	Q-STAR
								AQGFTEDTIVFLPQTDK	73.19	955.572	1908.95	1909.13	-95.3314	Q-STAR	Acetyl (N-term)
															Acetyl (N-term); Carbamidomethyl (C)
95	3630	gi|39654998 Chain A, Hr1b Domain From Prk1	9054	60	84	1	2	MIPATNLSR	40.57	522.83	1043.54	1043.65	-97.5427	Q-STAR
								CIPATNLSR	18.95	537.334	1072.53	1072.65	-111.313	Q-STAR	"(gi|1340142) (gi|4165890) (gi|6980544) (gi|50659080)
96	2229	1: gi|177933 alpha-1-antichymotrypsin precursor 2: gi|1340142 alpha1-antichymotrypsin [Homo sapiens] 3: gi|4165890 alpha-1-antichymotrypsin precursor [Homo sapiens] 4: gi|6980544 Chain A, Alpha1-Antichymotrypsin Serpin In The Delta Conformation (Partial Loop Insertion) 5: gi|50659080 serpin peptidase inhibitor, clade A, member 3 precursor [Homo sapiens]	45453.4	319	100	16	15	AVLDVFEEGTEASAATAVK	86	636.691	1907.05	1906.95	51.3049	Q-STAR
								ITLLSALVETR	84	608.398	1214.78	1214.72	47.4034	Q-STAR	Carbamidomethyl (C)
								EIGELYLPK	68	531.344	1060.67	1060.58	88.1913	Q-STAR
								DEELSCTVVELK	55	711.392	1420.77	1420.68	65.7941	Q-STAR
								EQLSLLDR	45	487.297	972.579	972.524	56.4665	Q-STAR	Oxidation (M)
								AKWEMPFDPQDTHQSR	44	658.347	1972.02	1971.89	65.2323	Q-STAR
								MEEVEAMLLPETLK	44	824.945	1647.87	1647.81	39.2624	Q-STAR
								MEEVEAMLLPETLK	42	816.945	1631.88	1631.81	37.4675	Q-STAR
								GTHVDLGLASANVDFAFSLYK	42	742.422	2224.24	2224.12	57.1751	Q-STAR
								EQLSLLDR	41	487.298	972.581	972.524	58.5826	Q-STAR	2 Oxidation (M)
								FNRPFLMIIVPTDTQNIFFMSK	39	887.187	2658.54	2658.37	63.3821	Q-STAR
								FNRPFLMIIVPTDTQNIFFMSK	39	897.838	2690.49	2690.36	48.7857	Q-STAR
								EQLSLLDRFTEDAKR	35	607.685	1820.03	1819.94	49.6972	Q-STAR
								EQLSLLDR	32	487.297	972.58	972.524	57.8217	Q-STAR	"
96	2229	1: gi|9665262 EGF-containing fibulin-like extracellular matrix protein 1 precursor [Homo sapiens]	54604.2	199	100	6	5	SVPSDIFQIQATTIYANTINTFR	80	867.501	2599.48	2599.33	58.4716	Q-STAR	Oxidation (M)
								EHIVDLEMLTVSSIGTFR	66	683.061	2046.16	2046.05	56.5012	Q-STAR
								EHIVDLEMLTVSSIGTFR	59	688.389	2062.15	2062.04	51.111	Q-STAR	2 Carbamidomethyl (C)
								SGNENGEFYLR	56	643.332	1284.65	1284.57	58.6483	Q-STAR
								CVNHYGGYLCLPK	40	527.614	1579.82	1579.73	58.5512	Q-STAR	"(gi|553181) (gi|4557287) (gi|15079348) (gi|37790798) (gi|62089124) (gi|62897155)
96	2229	1: gi|532198 angiotensinogen 2: gi|553181 angiotensinogen 3: gi|4557287 angiotensinogen preproprotein [Homo sapiens] 4: gi|15079348 Angiotensinogen (serpin peptidase inhibitor, clade A, member 8) [Homo sapiens] 5: gi|37790798 angiotensinogen (serine (or cysteine) proteinase inhibitor, clade A (alpha-1 antiproteinase, antitr 6: gi|62089124 angiotensinogen precursor variant [Homo sapiens] 7: gi|628…	53121.5	79	100	2	2	ADSQAQLLLSTVVGVFTAPGLHLK	53	822.513	2464.52	2464.37	60.5173	Q-STAR
								ALQDQLVLVAAK	51	634.916	1267.82	1267.75	54.0193	Q-STAR	"(gi|177933) (gi|1340142) (gi|4165890) (gi|6980544) (gi|50659080)
96	2229	1: gi|177809 alpha-1-antichymotrypsin 2: gi|177933 alpha-1-antichymotrypsin precursor 3: gi|1340142 alpha1-antichymotrypsin [Homo sapiens] 4: gi|4165890 alpha-1-antichymotrypsin precursor [Homo sapiens] 5: gi|6980544 Chain A, Alpha1-Antichymotrypsin Serpin In The Delta Conformation (Partial Loop Insertion) 6: gi|50659080 serpin peptidase inhibitor, clade A, member 3 precursor [Homo sapiens]	48606	249	100	9	9	ADLSGITGAR	88	480.76	959.505	959.504	1.95622	LTQ-FT
								NLAVSQVVHK	73	547.82	1093.63	1093.62	1.00949	LTQ-FT
								ITLLSALVETR	68	608.37	1214.73	1214.72	1.68269	LTQ-FT
								EQLSLLDR	50	487.27	972.525	972.524	1.50228	LTQ-FT	Carbamidomethyl (C)
								GKITDLIK	49	444.28	886.545	886.549	-3.70989	LTQ-FT
								DEELSCTVVELK	41	711.35	1420.69	1420.68	6.98682	LTQ-FT
								DSLEFR	39	383.69	765.365	765.366	-0.318802	LTQ-FT
								NLAVSQVVHK	36	365.55	1093.63	1093.62	3.50029	LTQ-FT
								FTEDAKR	32	433.72	865.425	865.429	-4.51106	LTQ-FT	"(gi|9665262) (gi|62088004)
															Oxidation (M)
96	2229	1: gi|7512417 extracellular protein - human 2: gi|9665262 EGF-containing fibulin-like extracellular matrix protein 1 precursor [Homo sapiens] 3: gi|62088004 EGF-containing fibulin-like extracellular matrix protein 1 isoform b variant [Homo sapiens]	43108.8	79	100	2	2	SGNENGEFYLR	53	643.3	1284.59	1284.57	9.3712	LTQ-FT
								QTSPVSAMLVLVK	50	694.9	1387.79	1387.77	7.92852	LTQ-FT	"(gi|4502005)
96	2229	1: gi|2521983 alpha2-HS glycoprotein [Homo sapiens] 2: gi|4502005 alpha-2-HS-glycoprotein [Homo sapiens]	39398.8	60	99	2	2	HTLNQIDEVK	55	598.82	1195.63	1195.62	4.82846	LTQ-FT
								FSVVYAK	31	407.23	812.445	812.443	2.77681	LTQ-FT	"(gi|1340142) (gi|4165890) (gi|6980544) (gi|50659080)
97	2235	1: gi|177933 alpha-1-antichymotrypsin precursor 2: gi|1340142 alpha1-antichymotrypsin [Homo sapiens] 3: gi|4165890 alpha-1-antichymotrypsin precursor [Homo sapiens] 4: gi|6980544 Chain A, Alpha1-Antichymotrypsin Serpin In The Delta Conformation (Partial Loop Insertion) 5: gi|50659080 serpin peptidase inhibitor, clade A, member 3 precursor [Homo sapiens]	45453.4	497	100	17	22	EIGELYLPK	87	531.349	1060.68	1060.58	97.2562	Q-STAR	Carbamidomethyl (C)
								MEEVEAMLLPETLK	77	816.948	1631.88	1631.81	40.8796	Q-STAR
								DEELSCTVVELK	73	711.386	1420.76	1420.68	58.0456	Q-STAR
								AVLDVFEEGTEASAATAVK	68	636.691	1907.05	1906.95	52.1466	Q-STAR
								LYGSEAFATDFQDSAAAK	67	946.476	1890.94	1890.86	39.5967	Q-STAR
								AKWEMPFDPQDTHQSR	63	658.341	1972	1971.89	56.6685	Q-STAR
								LYGSEAFATDFQDSAAAKK	62	674.033	2019.08	2018.96	58.8937	Q-STAR
								ITLLSALVETR	60	608.397	1214.78	1214.72	45.8623	Q-STAR
								NLAVSQVVHK	56	547.831	1093.65	1093.62	21.7607	Q-STAR
								RLYGSEAFATDFQDSAAAKK	50	726.064	2175.17	2175.06	51.2335	Q-STAR
								EQLSLLDR	46	487.296	972.578	972.524	55.831	Q-STAR
								MEEVEAMLLPETLKR	46	597.007	1788	1787.92	45.6487	Q-STAR	Oxidation (M)
								FNRPFLMIIVPTDTQNIFFMSK	45	887.183	2658.53	2658.37	58.9312	Q-STAR
								FNRPFLMIIVPTDTQNIFFMSK	37	892.498	2674.47	2674.37	40.5401	Q-STAR
								GTHVDLGLASANVDFAFSLYK	33	742.433	2224.28	2224.12	72.5115	Q-STAR
								EQLSLLDR	33	487.296	972.577	972.524	54.9837	Q-STAR
								EQLSLLDR	33	487.294	972.574	972.524	51.1216	Q-STAR
								WVMVPMMSLHHLTIPYFR	33	565.326	2257.27	2257.14	60.773	Q-STAR
								EQLSLLDRFTEDAKR	32	607.689	1820.05	1819.94	56.1672	Q-STAR	2 Oxidation (M)
								EQLSLLDR	32	487.292	972.57	972.524	47.2616	Q-STAR
								FNRPFLMIIVPTDTQNIFFMSK	31	897.839	2690.5	2690.36	50.6122	Q-STAR	"(gi|1340142) (gi|4165890) (gi|6980544) (gi|50659080)
															Oxidation (M)
97	2235	1: gi|177933 alpha-1-antichymotrypsin precursor 2: gi|1340142 alpha1-antichymotrypsin [Homo sapiens] 3: gi|4165890 alpha-1-antichymotrypsin precursor [Homo sapiens] 4: gi|6980544 Chain A, Alpha1-Antichymotrypsin Serpin In The Delta Conformation (Partial Loop Insertion) 5: gi|50659080 serpin peptidase inhibitor, clade A, member 3 precursor [Homo sapiens]	45453.4	337	100	15	13	ADLSGITGAR	78	480.76	959.505	959.504	1.95622	LTQ-FT
								AKWEMPFDPQDTHQSR	70	663.64	1987.9	1987.88	6.80522	LTQ-FT
								NLAVSQVVHK	70	547.82	1093.63	1093.62	1.00949	LTQ-FT
								ITLLSALVETR	64	608.373	1214.73	1214.72	6.85259	LTQ-FT
								AVLDVFEEGTEASAATAVK	63	636.66	1906.96	1906.95	3.07873	LTQ-FT
								GKITDLIK	51	444.28	886.545	886.549	-3.70989	LTQ-FT	Carbamidomethyl (C)
								EQLSLLDR	51	487.27	972.525	972.524	1.50228	LTQ-FT	Oxidation (M)
								DEELSCTVVELK	49	711.35	1420.69	1420.68	6.98682	LTQ-FT
								WEMPFDPQDTHQSR	43	597.26	1788.76	1788.75	3.12676	LTQ-FT
								ITDLIK	42	351.72	701.425	701.432	-9.80708	LTQ-FT
								DSLEFR	36	383.69	765.365	765.366	-0.318802	LTQ-FT
								NLAVSQVVHK	31	365.55	1093.63	1093.62	3.50029	LTQ-FT	Oxidation (M)"(gi|4502005)
97	2235	1: gi|2521983 alpha2-HS glycoprotein [Homo sapiens] 2: gi|4502005 alpha-2-HS-glycoprotein [Homo sapiens]	39398.8	115	100	4	4	HTFMGVVSLGSPSGEVSHPR	74	699.68	2096.02	2096.01	3.49378	LTQ-FT	Carbamidomethyl (C)
								HTLNQIDEVK	57	598.82	1195.63	1195.62	4.82846	LTQ-FT
								CNLLAEK	36	424.22	846.425	846.427	-1.72726	LTQ-FT
								FSVVYAK	32	407.23	812.445	812.443	2.77681	LTQ-FT	"(gi|9665262) (gi|62088004) (gi|62822120)
															Oxidation (M)
97	2235	1: gi|7512417 extracellular protein - human 2: gi|9665262 EGF-containing fibulin-like extracellular matrix protein 1 precursor [Homo sapiens] 3: gi|62088004 EGF-containing fibulin-like extracellular matrix protein 1 isoform b variant [Homo sapiens] 4: gi|62822120 unknown [Homo sapiens]	43108.8	133	100	6	4	EHIVDLEMLTVSSIGTFR	61	683.07	2046.19	2046.05	69.4642	Q-STAR
								QTSPVSAMLVLVK	50	694.934	1387.85	1387.77	56.5272	Q-STAR	Oxidation (M)
								SGNENGEFYLR	46	643.325	1284.64	1284.57	48.441	Q-STAR
								EHIVDLEMLTVSSIGTFR	45	688.395	2062.16	2062.04	59.8097	Q-STAR	Oxidation (M)"(gi|73858564)
97	2235	1: gi|115851 Corticosteroid-binding globulin precursor (CBG) (Transcortin) (Serpin A6) 2: gi|73858564 corticosteroid binding globulin precursor [Homo sapiens]	45111.9	111	100	3	3	MNTVIAALSR	73	546.3	1090.59	1090.58	4.58838	LTQ-FT
								WSAGLTSSQVDLYIPK	45	882.97	1763.93	1763.91	9.11895	LTQ-FT
								HLVALSPK	43	432.77	863.525	863.523	2.99934	LTQ-FT	"(gi|386858) (gi|998999) (gi|4557892)
97	2235	1: gi|187025 lecithin:cholesterol acyltransferase precursor 2: gi|386858 lecithin-cholesterol acyltransferase precursor (EC 2.3.1.43) 3: gi|998999 lecithin:cholesterol acyltransferase, LCAT [human, plasma, Peptide, 416 aa] 4: gi|4557892 lecithin-cholesterol acyltransferase precursor [Homo sapiens]	47850.2	84	100	2	2	LAGYLHTLVQNLVNNGYVRDETVR	55	686.912	2743.62	2743.44	64.5248	Q-STAR
								TYSVEYLDSSK	52	646.347	1290.68	1290.6	63.641	Q-STAR	Oxidation (M)"(gi|73858564)
97	2235	1: gi|115851 Corticosteroid-binding globulin precursor (CBG) (Transcortin) (Serpin A6) 2: gi|73858564 corticosteroid binding globulin precursor [Homo sapiens]	45111.9	65	98	3	3	MNTVIAALSR	47	546.325	1090.63	1090.58	49.9716	Q-STAR
								MNTVIAALSR	47	538.32	1074.62	1074.59	36.6002	Q-STAR	Oxidation (M)"(gi|9665262) (gi|62088004) (gi|62822120)
97	2235	1: gi|7512417 extracellular protein - human 2: gi|9665262 EGF-containing fibulin-like extracellular matrix protein 1 precursor [Homo sapiens] 3: gi|62088004 EGF-containing fibulin-like extracellular matrix protein 1 isoform b variant [Homo sapiens] 4: gi|62822120 unknown [Homo sapiens]	43108.8	84			1	QTSPVSAMLVLVK	84	694.9	1387.79	1387.77	7.92852	LTQ-FT	"(gi|1340142) (gi|4165890) (gi|6980544) (gi|21961493) (gi|50659080)
98	2261	1: gi|177933 alpha-1-antichymotrypsin precursor 2: gi|1340142 alpha1-antichymotrypsin [Homo sapiens] 3: gi|4165890 alpha-1-antichymotrypsin precursor [Homo sapiens] 4: gi|6980544 Chain A, Alpha1-Antichymotrypsin Serpin In The Delta Conformation (Partial Loop Insertion) 5: gi|21961493 Serpin peptidase inhibitor, clade A (alpha-1 antiproteinase, antitrypsin), member 3 [Homo sapiens] 6: gi|50659080 …	45453.4	255	100	12	12	ITLLSALVETR	72	608.401	1214.79	1214.72	52.5815	Q-STAR
								AVLDVFEEGTEASAATAVK	67	636.692	1907.05	1906.95	53.5561	Q-STAR
								AKWEMPFDPQDTHQSR	62	658.349	1972.02	1971.89	68.514	Q-STAR
								LYGSEAFATDFQDSAAAK	59	946.482	1890.95	1890.86	45.8415	Q-STAR
								EIGELYLPK	55	531.331	1060.65	1060.58	63.5086	Q-STAR
								EQLSLLDR	49	487.296	972.578	972.524	55.5801	Q-STAR	2 Oxidation (M)
								LYGSEAFATDFQDSAAAKK	47	674.031	2019.07	2018.96	55.7183	Q-STAR
								FNRPFLMIIVPTDTQNIFFMSK	40	897.834	2690.48	2690.36	44.5126	Q-STAR
								FNRPFLMIIVPTDTQNIFFMSK	38	887.172	2658.5	2658.37	47.1767	Q-STAR
								EQLSLLDR	36	487.295	972.576	972.524	53.4948	Q-STAR
								EQLSLLDR	36	487.303	972.592	972.524	69.8338	Q-STAR
								EQLSLLDR	32	487.294	972.573	972.524	50.5849	Q-STAR	"(gi|177933) (gi|1340142) (gi|4165890) (gi|6980544) (gi|50659080)
98	2261	1: gi|177809 alpha-1-antichymotrypsin 2: gi|177933 alpha-1-antichymotrypsin precursor 3: gi|1340142 alpha1-antichymotrypsin [Homo sapiens] 4: gi|4165890 alpha-1-antichymotrypsin precursor [Homo sapiens] 5: gi|6980544 Chain A, Alpha1-Antichymotrypsin Serpin In The Delta Conformation (Partial Loop Insertion) 6: gi|50659080 serpin peptidase inhibitor, clade A, member 3 precursor [Homo sapiens]	48606	236	100	9	9	ADLSGITGAR	73	480.76	959.505	959.504	1.95622	LTQ-FT
								NLAVSQVVHK	73	547.82	1093.63	1093.62	1.00949	LTQ-FT	Carbamidomethyl (C)
								ITLLSALVETR	68	608.375	1214.73	1214.72	9.47047	LTQ-FT
								DEELSCTVVELK	51	711.35	1420.69	1420.68	6.98682	LTQ-FT
								EQLSLLDR	51	487.27	972.525	972.524	1.50228	LTQ-FT	Oxidation (M)
								GKITDLIK	45	444.283	886.552	886.549	3.41888	LTQ-FT
								WEMPFDPQDTHQSR	35	597.26	1788.76	1788.75	3.12676	LTQ-FT
								DSLEFR	35	383.69	765.365	765.366	-0.318802	LTQ-FT
								ITDLIK	35	351.72	701.425	701.432	-9.80708	LTQ-FT	Oxidation (M)"
98	2261	1: gi|9665262 EGF-containing fibulin-like extracellular matrix protein 1 precursor [Homo sapiens]	54604.2	140	100	6	6	EHIVDLEMLTVSSIGTFR	68	688.391	2062.15	2062.04	53.8069	Q-STAR
								EHIVDLEMLTVSSIGTFR	51	683.062	2046.16	2046.05	57.271	Q-STAR	Carbamidomethyl (C)
								SVPSDIFQIQATTIYANTINTFR	50	867.496	2599.46	2599.33	52.6201	Q-STAR	2 Carbamidomethyl (C)
								ADQVCINLR	42	544.805	1087.6	1087.54	47.7636	Q-STAR
								CVNHYGGYLCLPK	32	527.612	1579.81	1579.73	54.5442	Q-STAR	"(gi|553181) (gi|4557287) (gi|15079348) (gi|37790798) (gi|62089124) (gi|62897155)
98	2261	1: gi|532198 angiotensinogen 2: gi|553181 angiotensinogen 3: gi|4557287 angiotensinogen preproprotein [Homo sapiens] 4: gi|15079348 Angiotensinogen (serpin peptidase inhibitor, clade A, member 8) [Homo sapiens] 5: gi|37790798 angiotensinogen (serine (or cysteine) proteinase inhibitor, clade A (alpha-1 antiproteinase, antitr 6: gi|62089124 angiotensinogen precursor variant [Homo sapiens] 7: gi|628…	53121.5	95	100	3	3	ALQDQLVLVAAK	55	634.915	1267.82	1267.75	51.8407	Q-STAR
								ADSQAQLLLSTVVGVFTAPGLHLK	52	822.507	2464.5	2464.37	52.9685	Q-STAR
								QPFVQGLALYTPVVLPR	44	633.398	1897.17	1897.08	46.6527	Q-STAR	"(gi|15778922) (gi|19557645)
98	2261	1: gi|5531817 secretogranin III [Homo sapiens] 2: gi|15778922 Secretogranin III [Homo sapiens] 3: gi|19557645 secretogranin III [Homo sapiens]	53047.9	58	100	3	3	TLIDFVK	37	418.271	834.528	834.485	51.0914	Q-STAR
								FQDDPDGLHQLDGTPLTAEDIVHK	33	666.113	2660.42	2660.27	56.7574	Q-STAR
								LLNLGLITESQAHTLEDEVAEVLQK	32	921.872	2762.59	2762.47	44.4685	Q-STAR	"(gi|4502005)
															Carbamidomethyl (C)
98	2261	1: gi|2521983 alpha2-HS glycoprotein [Homo sapiens] 2: gi|4502005 alpha-2-HS-glycoprotein [Homo sapiens]	39398.8	67	100	3	3	HTLNQIDEVK	57	598.82	1195.63	1195.62	4.82846	LTQ-FT
								CNLLAEK	36	424.22	846.425	846.427	-1.72726	LTQ-FT
								FSVVYAK	32	407.23	812.445	812.443	2.77681	LTQ-FT	"
98	2261	1: gi|4826876 osteomodulin [Homo sapiens]	49460.2	50	98	2	2	LQDIPYNIFNLPNIVELSVGHNK	50	879.855	2636.54	2636.4	56.0955	Q-STAR
								LLLGYNEISK	31	575.364	1148.71	1148.64	60.2859	Q-STAR	"
98	2261	1: gi|5802984 UDP-GlcNAc:betaGal beta-1,3-N-acetylglucosaminyltransferase 1 [Homo sapiens]	47088.9	60	100	2	2	TALASGGVLDASGDYR	46	776.89	1551.77	1551.75	8.12629	LTQ-FT
								VPTFDER	40	432.22	862.425	862.418	8.10627	LTQ-FT	Carbamidomethyl (C)"(gi|1340142) (gi|4165890) (gi|6980544) (gi|50659080)
99	2262	1: gi|177933 alpha-1-antichymotrypsin precursor 2: gi|1340142 alpha1-antichymotrypsin [Homo sapiens] 3: gi|4165890 alpha-1-antichymotrypsin precursor [Homo sapiens] 4: gi|6980544 Chain A, Alpha1-Antichymotrypsin Serpin In The Delta Conformation (Partial Loop Insertion) 5: gi|50659080 serpin peptidase inhibitor, clade A, member 3 precursor [Homo sapiens]	45453.4	284	100	14	15	DEELSCTVVELK	73	711.386	1420.76	1420.68	57.9302	Q-STAR
								ITLLSALVETR	70	608.401	1214.79	1214.72	53.4887	Q-STAR
								MEEVEAMLLPETLK	56	816.956	1631.9	1631.81	50.9212	Q-STAR
								EQLSLLDR	54	487.289	972.563	972.524	39.8067	Q-STAR
								EQLSLLDR	54	487.299	972.584	972.524	62.0869	Q-STAR
								AVLDVFEEGTEASAATAVK	52	636.691	1907.05	1906.95	51.1995	Q-STAR
								EIGELYLPK	48	531.352	1060.69	1060.58	103.198	Q-STAR
								EQLSLLDR	42	487.296	972.577	972.524	54.5622	Q-STAR
								LYGSEAFATDFQDSAAAK	42	946.486	1890.96	1890.86	50.0258	Q-STAR
								AKWEMPFDPQDTHQSR	41	658.342	1972	1971.89	57.3668	Q-STAR
								EQLSLLDRFTEDAK	37	555.65	1663.93	1663.84	51.5337	Q-STAR
								FNRPFLMIIVPTDTQNIFFMSK	35	887	2657.98	2658.37	-147.45	Q-STAR	2 Oxidation (M)
								GTHVDLGLASANVDFAFSLYK	35	742.411	2224.21	2224.12	43.2495	Q-STAR
								FNRPFLMIIVPTDTQNIFFMSK	35	897.834	2690.48	2690.36	44.7524	Q-STAR
								EQLSLLDR	33	487.297	972.579	972.524	56.193	Q-STAR	"
99	2262	1: gi|9665262 EGF-containing fibulin-like extracellular matrix protein 1 precursor [Homo sapiens]	54604.2	242	100	8	8	EHIVDLEMLTVSSIGTFR	79	683.054	2046.14	2046.05	46.9559	Q-STAR
								SGNENGEFYLR	76	643.336	1284.66	1284.57	65.4692	Q-STAR
								SGNENGEFYLR	76	643.326	1284.64	1284.57	49.6056	Q-STAR	Oxidation (M)
								SVPSDIFQIQATTIYANTINTFR	64	867.497	2599.47	2599.33	54.289	Q-STAR	2 Carbamidomethyl (C)
								EHIVDLEMLTVSSIGTFR	54	688.395	2062.16	2062.04	59.7675	Q-STAR	Oxidation (M)
								CVNHYGGYLCLPK	40	527.613	1579.82	1579.73	57.0453	Q-STAR
								QTSPVSAMLVLVK	39	694.931	1387.85	1387.77	52.2556	Q-STAR
								ELPQSIVYK	31	538.825	1075.63	1075.59	40.296	Q-STAR	"(gi|177933) (gi|443345) (gi|1340142) (gi|2982038) (gi|2982150) (gi|2982165) (gi|4165890) (gi|6980544) (gi|50659080)
99	2262	1: gi|177809 alpha-1-antichymotrypsin 2: gi|177933 alpha-1-antichymotrypsin precursor 3: gi|443345 Chain A, Alpha1 Antichymotrypsin 4: gi|1340142 alpha1-antichymotrypsin [Homo sapiens] 5: gi|2982038 Chain A, Cleaved Antichymotrypsin A349r 6: gi|2982150 Chain A, Cleaved Antichymotrypsin A347r 7: gi|2982165 Chain A, Cleaved Antichymotrypsin T345r 8: gi|4165890 alpha-1-antichymotrypsin precursor [Ho…	48606	180	100	6	6	ADLSGITGAR	84	480.76	959.505	959.504	1.95622	LTQ-FT	Oxidation (M)
								NLAVSQVVHK	70	547.82	1093.63	1093.62	1.00949	LTQ-FT
								WEMPFDPQDTHQSR	50	597.26	1788.76	1788.75	3.12676	LTQ-FT	Carbamidomethyl (C)
								EQLSLLDR	45	487.27	972.525	972.524	1.50228	LTQ-FT
								DEELSCTVVELK	38	711.35	1420.69	1420.68	6.98682	LTQ-FT
								DSLEFR	35	383.69	765.365	765.366	-0.318802	LTQ-FT	Carbamidomethyl (C)"(gi|9665262) (gi|62088004)
															2 Carbamidomethyl (C)
99	2262	1: gi|7512417 extracellular protein - human 2: gi|9665262 EGF-containing fibulin-like extracellular matrix protein 1 precursor [Homo sapiens] 3: gi|62088004 EGF-containing fibulin-like extracellular matrix protein 1 isoform b variant [Homo sapiens]	43108.8	158	100	5	5	ADQVCINLR	70	544.78	1087.55	1087.54	0.96088	LTQ-FT
								LNCEDIDECR	69	662.27	1322.53	1322.52	1.78522	LTQ-FT	Oxidation (M)
								SGNENGEFYLR	60	643.3	1284.59	1284.57	9.3712	LTQ-FT
								QTSPVSAMLVLVK	40	694.9	1387.79	1387.77	7.92852	LTQ-FT
								RNPADPQR	31	477.25	952.485	952.484	1.67142	LTQ-FT	"
99	2262	1: gi|5802984 UDP-GlcNAc:betaGal beta-1,3-N-acetylglucosaminyltransferase 1 [Homo sapiens]	47088.9	168	100	4	4	TALASGGVLDASGDYR	77	776.907	1551.8	1551.75	30.4262	Q-STAR	Oxidation (M)
								TTMDPNDVILATHASVDNLLHLSGLLER	65	762.197	3044.76	3044.56	65.729	Q-STAR
								TTMDPNDVILATHASVDNLLHLSGLLER	63	766.19	3060.73	3060.55	58.0316	Q-STAR
								EPGEFALLR	46	516.305	1030.6	1030.54	49.1963	Q-STAR	"(gi|553181) (gi|4557287) (gi|15079348) (gi|37790798) (gi|62089124) (gi|62897155)
99	2262	1: gi|532198 angiotensinogen 2: gi|553181 angiotensinogen 3: gi|4557287 angiotensinogen preproprotein [Homo sapiens] 4: gi|15079348 Angiotensinogen (serpin peptidase inhibitor, clade A, member 8) [Homo sapiens] 5: gi|37790798 angiotensinogen (serine (or cysteine) proteinase inhibitor, clade A (alpha-1 antiproteinase, antitr 6: gi|62089124 angiotensinogen precursor variant [Homo sapiens] 7: gi|628…	53121.5	133	100	3	3	SLDFTELDVAAEK	70	719.394	1436.77	1436.7	48.9906	Q-STAR
								ALQDQLVLVAAK	62	634.908	1267.8	1267.75	41.326	Q-STAR
								ADSQAQLLLSTVVGVFTAPGLHLK	58	822.512	2464.51	2464.37	59.065	Q-STAR	"(gi|37748641) (gi|62898910) (gi|124056474)
99	2262	1: gi|4504893 kininogen 1 [Homo sapiens] 2: gi|37748641 Kininogen 1 [Homo sapiens] 3: gi|62898910 kininogen 1 variant [Homo sapiens] 4: gi|124056474 Kininogen-1 precursor (Alpha-2-thiol proteinase inhibitor) [Contains: Kininogen-1 heavy chain; Brad	47852.7	59	100	3	3	DIPTNSPELEETLTHTITK	53	713.739	2138.2	2138.07	56.6926	Q-STAR
								QVVAGLNFR	37	502.316	1002.62	1002.56	55.3313	Q-STAR
								TVGSDTFYSFK	33	626.322	1250.63	1250.58	38.8211	Q-STAR	"
99	2262	1: gi|4826876 osteomodulin [Homo sapiens]	49460.2	56	100	2	2	LQDIPYNIFNLPNIVELSVGHNK	45	879.84	2636.5	2636.4	39.1804	Q-STAR
								LLLGYNEISK	38	575.352	1148.69	1148.64	38.737	Q-STAR	"
99	2262	1: gi|5802984 UDP-GlcNAc:betaGal beta-1,3-N-acetylglucosaminyltransferase 1 [Homo sapiens]	47088.9	90	100	2	2	TALASGGVLDASGDYR	77	776.89	1551.77	1551.75	8.12629	LTQ-FT
								VPTFDER	39	432.22	862.425	862.418	8.10627	LTQ-FT	"(gi|37748641) (gi|62898910) (gi|124056474)
99	2262	1: gi|4504893 kininogen 1 [Homo sapiens] 2: gi|37748641 Kininogen 1 [Homo sapiens] 3: gi|62898910 kininogen 1 variant [Homo sapiens] 4: gi|124056474 Kininogen-1 precursor (Alpha-2-thiol proteinase inhibitor) [Contains: Kininogen-1 heavy chain; Brad	47852.7	67	100	2	2	TVGSDTFYSFK	53	626.3	1250.59	1250.58	2.85387	LTQ-FT
								QVVAGLNFR	44	502.29	1002.57	1002.56	4.43165	LTQ-FT	Oxidation (M)"(gi|55962670) (gi|55962671) (gi|55962673)
102	3508	1: gi|32171249 prostaglandin H2 D-isomerase [Homo sapiens] 2: gi|55962670 prostaglandin D2 synthase 21kDa (brain) [Homo sapiens] 3: gi|55962671 prostaglandin D2 synthase 21kDa (brain) [Homo sapiens] 4: gi|55962673 prostaglandin D2 synthase 21kDa (brain) [Homo sapiens]	21015.3	65	95	1	1	TMLLQPAGSLGSYSYR	65	587.34	1759	1758.86	77.6417	Q-STAR	"(gi|29726259) (gi|84028186)
103	2825	1: gi|23512215 Chitinase 3-like 1 (cartilage glycoprotein-39) [Homo sapiens] 2: gi|29726259 Chain A, Crystal Structure Of Hcgp-39 In Complex With Chitin Tetramer 3: gi|84028186 Chitinase-3-like protein 1 precursor (Cartilage glycoprotein 39) (GP-39) (39 kDa synovial protein)	42499.3	206	100	10	7	QLLLSAALSAGK	73	586.393	1170.77	1170.7	63.3998	Q-STAR
								SFTLASSETGVGAPISGPGIPGR	71	720.09	2157.25	2157.11	66.076	Q-STAR
								ILGQQVPYATK	58	609.384	1216.75	1216.68	58.8354	Q-STAR
								VTIDSSYDIAK	50	606.347	1210.68	1210.61	59.6204	Q-STAR	Oxidation (M)
								TLLSVGGWNFGSQR	47	507.967	1520.88	1520.77	69.147	Q-STAR
								LVMGIPTFGR	40	553.846	1105.68	1105.6	74.9316	Q-STAR
								FPLTNAIK	39	452.305	902.595	902.523	80.8046	Q-STAR	"(gi|23512215) (gi|29726259) (gi|84028186)
104	2863	1: gi|4557018 chitinase 3-like 1 [Homo sapiens] 2: gi|23512215 Chitinase 3-like 1 (cartilage glycoprotein-39) [Homo sapiens] 3: gi|29726259 Chain A, Crystal Structure Of Hcgp-39 In Complex With Chitin Tetramer 4: gi|84028186 Chitinase-3-like protein 1 precursor (Cartilage glycoprotein 39) (GP-39) (39 kDa synovial protein)	42586.4	150	100	5	5	SFTLASSETGVGAPISGPGIPGR	67	720.087	2157.24	2157.11	61.8287	Q-STAR	Carbamidomethyl (C)
								QLLLSAALSAGK	65	586.39	1170.76	1170.7	57.5059	Q-STAR
								EAGTLAYYEICDFLR	58	607.665	1819.97	1819.85	69.5916	Q-STAR
								VTIDSSYDIAK	50	606.345	1210.68	1210.61	56.1528	Q-STAR	Carbamidomethyl (C)"(gi|84028186)
105	2846	1: gi|29726259 Chain A, Crystal Structure Of Hcgp-39 In Complex With Chitin Tetramer 2: gi|84028186 Chitinase-3-like protein 1 precursor (Cartilage glycoprotein 39) (GP-39) (39 kDa synovial protein)	40463.3	346	100	15	13	EGDGSCFPDALDR	72	719.859	1437.7	1437.58	84.3103	Q-STAR	Carbamidomethyl (C)
								ILGQQVPYATK	71	609.378	1216.74	1216.68	49.349	Q-STAR
								EGDGSCFPDALDR	64	719.844	1437.67	1437.58	62.2441	Q-STAR
								SFTLASSETGVGAPISGPGIPGR	63	720.094	2157.26	2157.11	70.6502	Q-STAR	Oxidation (M)
								QLLLSAALSAGK	61	586.393	1170.77	1170.7	62.8736	Q-STAR	Carbamidomethyl (C)
								ISQHLDFISIMTYDFHGAWR	51	614.097	2452.36	2452.16	79.2831	Q-STAR
								EGDGSCFPDALDR	50	719.862	1437.71	1437.58	88.3838	Q-STAR
								VTIDSSYDIAK	47	606.344	1210.67	1210.61	53.7226	Q-STAR	Carbamidomethyl (C)
								THGFDGLDLAWLYPGR	44	606.685	1817.03	1816.89	79.5359	Q-STAR	Carbamidomethyl (C)
								EAGTLAYYEICDFLR	44	607.678	1820.01	1819.85	91.4737	Q-STAR	Pyro-glu (N-term Q)
								EGDGSCFPDALDR	44	719.856	1437.7	1437.58	79.7053	Q-STAR
								QHFTTLIK	37	485.81	969.605	969.528	78.7455	Q-STAR
								TLLSVGGWNFGSQR	34	761.443	1520.87	1520.77	63.8333	Q-STAR	"(gi|29726259) (gi|84028186)
															Oxidation (M)
106	2843	1: gi|23512215 Chitinase 3-like 1 (cartilage glycoprotein-39) [Homo sapiens] 2: gi|29726259 Chain A, Crystal Structure Of Hcgp-39 In Complex With Chitin Tetramer 3: gi|84028186 Chitinase-3-like protein 1 precursor (Cartilage glycoprotein 39) (GP-39) (39 kDa synovial protein)	42499.3	65	100	5	2	ILGQQVPYATK	58	609.382	1216.75	1216.68	55.7336	Q-STAR
								LVMGIPTFGR	36	553.854	1105.69	1105.6	88.3162	Q-STAR	"(gi|178853) (gi|364011) (gi|4557325)
107	3030	1: gi|178849 apolipoprotein E 2: gi|178853 apolipoprotein E 3: gi|364011 apolipoprotein E mutant E3K 4: gi|4557325 apolipoprotein E precursor [Homo sapiens]	36187.8	57	100	2	2	AATVGSLAGQPLQER	48	749.522	1497.03	1496.79	156.841	Q-STAR
								AKLEEQAQQIR	45	657.432	1312.85	1312.71	106.433	Q-STAR	Carbamidomethyl (C)"(gi|4557325)
107	3030	1: gi|364011 apolipoprotein E mutant E3K 2: gi|4557325 apolipoprotein E precursor [Homo sapiens]	36130.8	88	100	6	4	LGADMEDVCGR	63	611.796	1221.58	1221.51	53.2578	Q-STAR
								LGPLVEQGR	54	484.828	967.641	967.545	99.5209	Q-STAR
								SELEEQLTPVAEETR	47	865.993	1729.97	1729.84	77.3836	Q-STAR	"(gi|178853) (gi|364011) (gi|4557325)
108	3152	1: gi|178849 apolipoprotein E 2: gi|178853 apolipoprotein E 3: gi|364011 apolipoprotein E mutant E3K 4: gi|4557325 apolipoprotein E precursor [Homo sapiens]	36187.8	229	100	8	8	WVQTLSEQVQEELLSSQVTQELR	84	910.865	2729.57	2729.39	67.9918	Q-STAR
								SWFEPLVEDMQR	67	768.91	1535.81	1535.71	63.8032	Q-STAR
								SELEEQLTPVAEETR	64	865.985	1729.95	1729.84	68.0798	Q-STAR
								SELEEQLTPVAEETR	60	865.978	1729.94	1729.84	60.6814	Q-STAR	Oxidation (M)
								QWAGLVEK	57	465.782	929.549	929.497	55.4547	Q-STAR
								GEVQAMLGQSTEELR	53	555.306	1662.9	1662.79	65.1147	Q-STAR
								AYKSELEEQLTPVAEETR	50	698.404	2092.19	2092.03	75.2794	Q-STAR
								GEVQAMLGQSTEELR	49	549.98	1646.92	1646.79	75.0993	Q-STAR	"(gi|180620) (gi|32891795) (gi|42740907) (gi|57997569) (gi|338057)
108	3152	1: gi|178855 apolipoprotein J precursor 2: gi|180620 complement cytolysis inhibitor precursor 3: gi|32891795 clusterin (complement lysis inhibitor, SP-40,40, sulfated glycoprotein 2, testosterone-repressed pr 4: gi|42740907 clusterin isoform 2 [Homo sapiens] 5: gi|57997569 hypothetical protein [Homo sapiens] 6: gi|338057 sulfated glycoprotein-2	48772.1	77	100	4	4	ELDESLQVAER	64	644.859	1287.7	1287.63	57.3154	Q-STAR
								ASSIIDELFQDR	45	697.393	1392.77	1392.69	60.254	Q-STAR
								TLLSNLEEAK	35	559.345	1116.68	1116.6	66.0065	Q-STAR
								RPHFFFPK	33	359.231	1074.67	1074.58	87.0538	Q-STAR	"
108	3152	1: gi|42716297 clusterin isoform 1 [Homo sapiens]	57795.6	77	100	4	4	ELDESLQVAER	64	644.859	1287.7	1287.63	57.3154	Q-STAR
								ASSIIDELFQDR	45	697.393	1392.77	1392.69	60.254	Q-STAR
								TLLSNLEEAK	35	559.345	1116.68	1116.6	66.0065	Q-STAR
								RPHFFFPK	33	359.231	1074.67	1074.58	87.0538	Q-STAR
															"
109	3203	1: gi|178853 apolipoprotein E	36184.8	93	100	7	8	LGADMEDVR	53	503.312	1004.61	1004.46	148.818	Q-STAR
								SELEEQLTPVAEETR	50	866.024	1730.03	1729.84	113.985	Q-STAR
								AATVGSLAGQPLQER	46	749.483	1496.95	1496.79	105.288	Q-STAR
								LGPLVEQGR	45	484.822	967.63	967.545	87.3189	Q-STAR
								LAVYQAGAR	42	474.827	947.639	947.519	127.252	Q-STAR
								AKLEEQAQQIR	36	657.421	1312.83	1312.71	90.2979	Q-STAR
								DRLDEVKEQVAEVR	35	562.715	1685.12	1684.87	146.991	Q-STAR
								LQAEAFQAR	34	517.323	1032.63	1032.54	93.0622	Q-STAR	"(gi|2098255) (gi|2098257) (gi|3891560) (gi|4507725) (gi|62738386) (gi|73535906) (gi|55669575)
109	3203	1: gi|443295 Chain A, Transthyretin (Formerly Prealbumin) 2: gi|2098255 Chain A, Tertiary Structures Of Three Amyloidogenic Transthyretin Variants And Implications For Amy 3: gi|2098257 Chain A, Tertiary Structures Of Three Amyloidogenic Transthyretin Variants And Implications For Amy 4: gi|3891560 Chain A, Tertiary Structures Of Three Amyloidogenic Transthyretin Variants And Implications For Amy…	13752.9	56	99	2	2	TSESGELHGLTTEEEFVEGIYK	45	819.149	2454.43	2454.14	115.192	Q-STAR
								AADDTWEPFASGK	35	697.879	1393.74	1393.61	91.6961	Q-STAR	"(gi|2098257) (gi|62738386) (gi|73535906)
110	3185	1: gi|443295 Chain A, Transthyretin (Formerly Prealbumin) 2: gi|2098257 Chain A, Tertiary Structures Of Three Amyloidogenic Transthyretin Variants And Implications For Amy 3: gi|62738386 Chain A, The X-Ray Crystallographic Structure Of The Amyloidogenic Variant Ttr Tyr78phe 4: gi|73535906 Chain A, Crystal Structure Of Human Transthyretin With Bound Iodide	13752.9	186	100	8	8	AADDTWEPFASGK	67	697.877	1393.74	1393.61	88.734	Q-STAR
								GSPAINVAVHVFR	59	456.306	1365.9	1365.75	105.699	Q-STAR
								YTIAALLSPYSYSTTAVVTNPKE	43	830.7	2489.08	2488.27	323.319	Q-STAR
								GSPAINVAVHVFRK	41	499.013	1494.02	1493.85	114.743	Q-STAR
								GPTGTGESK	34	417.242	832.469	832.393	91.4304	Q-STAR
								RYTIAALLSPYSYSTTAVVTNPKE	33	882.551	2644.63	2644.37	96.6058	Q-STAR
								RYTIAALLSPYSYSTTAVVTNPK	33	839.545	2515.61	2515.33	111.707	Q-STAR
								ALGISPFHEHAEVVFTANDSGPR	31	613.626	2450.48	2450.2	113.361	Q-STAR	"
110	3185	1: gi|178853 apolipoprotein E	36184.8	108	100	6	6	LGADMEDVR	66	503.286	1004.56	1004.46	97.1428	Q-STAR
								SELEEQLTPVAEETR	50	866.002	1729.99	1729.84	87.6539	Q-STAR
								VQAAVGTSAAPVPSDNH	41	810.977	1619.94	1619.79	91.8749	Q-STAR
								AATVGSLAGQPLQER	40	749.472	1496.93	1496.79	90.1413	Q-STAR
								DRLDEVKEQVAEVR	36	562.704	1685.09	1684.87	128.701	Q-STAR
								LQAEAFQAR	35	517.322	1032.63	1032.54	92.086	Q-STAR	"(gi|180620) (gi|338057) (gi|338305) (gi|32891795) (gi|42716297) (gi|42740907)
110	3185	1: gi|178855 apolipoprotein J precursor 2: gi|180620 complement cytolysis inhibitor precursor 3: gi|338057 sulfated glycoprotein-2 4: gi|338305 'SP40,40' 5: gi|32891795 clusterin (complement lysis inhibitor, SP-40,40, sulfated glycoprotein 2, testosterone-repressed pr 6: gi|42716297 clusterin isoform 1 [Homo sapiens] 7: gi|42740907 clusterin isoform 2 [Homo sapiens]	48772.1	53	98	2	2	ELDESLQVAER	52	644.881	1287.75	1287.63	90.2782	Q-STAR
								ASSIIDELFQDR	32	697.437	1392.86	1392.69	122.498	Q-STAR	"(gi|178855) (gi|180620) (gi|338057) (gi|32891795) (gi|42716297) (gi|42740907) (gi|57997569)
111	3069	1: gi|338305 'SP40,40' 2: gi|178855 apolipoprotein J precursor 3: gi|180620 complement cytolysis inhibitor precursor 4: gi|338057 sulfated glycoprotein-2 5: gi|32891795 clusterin (complement lysis inhibitor, SP-40,40, sulfated glycoprotein 2, testosterone-repressed pr 6: gi|42716297 clusterin isoform 1 [Homo sapiens] 7: gi|42740907 clusterin isoform 2 [Homo sapiens] 8: gi|57997569 hypothetical pr…	36712	56	95	1	1	LFDSDPITVTVPVEVSR	56	625.377	1873.11	1872.98	66.9766	Q-STAR	"
															Oxidation (M)
113	3133	1: gi|178853 apolipoprotein E	36184.8	416	100	16	17	GEVQAMLGQSTEELR	122	824.449	1646.88	1646.79	54.427	Q-STAR
								GEVQAMLGQSTEELR	84	555.297	1662.87	1662.79	48.996	Q-STAR
								SELEEQLTPVAEETR	72	865.974	1729.93	1729.84	55.2127	Q-STAR
								WVQTLSEQVQEELLSSQVTQELR	68	910.861	2729.56	2729.39	64.1921	Q-STAR
								SWFEPLVEDMQR	63	768.904	1535.79	1535.71	55.8654	Q-STAR
								AYKSELEEQLTPVAEETR	54	698.402	2092.18	2092.03	72.6724	Q-STAR
								LKSWFEPLVEDMQR	52	593.335	1776.98	1776.89	54.7013	Q-STAR
								GEVQAMLGQSTEELRVR	52	635.035	1902.08	1901.96	62.659	Q-STAR
								QWAGLVEK	51	465.772	929.53	929.497	35.885	Q-STAR
								LQAEAFQAR	51	516.796	1031.58	1032.54	-927.12	Q-STAR
								SELEEQLTPVAEETR	49	577.664	1729.97	1729.84	76.9789	Q-STAR
								QQTEWQSGQR	49	624.309	1246.6	1246.57	28.3883	Q-STAR	Oxidation (M)
								LGPLVEQGR	43	484.78	967.546	967.545	1.14413	Q-STAR	Oxidation (M)
								SWFEPLVEDMQR	35	777.2	1552.39	1551.7	439.971	Q-STAR	Oxidation (M)
								LGADMEDVR	33	511.252	1020.49	1020.45	35.0971	Q-STAR
								LKSWFEPLVEDMQR	31	598.674	1793	1792.88	66.638	Q-STAR	"(gi|178855) (gi|180620) (gi|32891795) (gi|42740907) (gi|42716297)
113	3133	1: gi|338057 sulfated glycoprotein-2 2: gi|178855 apolipoprotein J precursor 3: gi|180620 complement cytolysis inhibitor precursor 4: gi|32891795 clusterin (complement lysis inhibitor, SP-40,40, sulfated glycoprotein 2, testosterone-repressed pr 5: gi|42740907 clusterin isoform 2 [Homo sapiens] 6: gi|42716297 clusterin isoform 1 [Homo sapiens]	45786.5	215	100	7	7	ASSIIDELFQDR	99	697.392	1392.77	1392.69	57.8629	Q-STAR
								ELDESLQVAER	91	644.842	1287.67	1287.63	30.6322	Q-STAR
								LFDSDPITVTVPVEVSR	58	625.37	1873.09	1872.98	56.7288	Q-STAR
								VTTVASHTSDSDVPSGVTEVVVK	56	772.11	2313.31	2313.17	59.2697	Q-STAR
								TLLSNLEEAK	54	559.336	1116.66	1116.6	48.5697	Q-STAR
								ASSIIDELFQDRFFTR	40	649.042	1944.11	1943.97	67.6485	Q-STAR
								VTTVASHTSDSDVPSGVTEVVVK	31	772.111	2313.31	2313.17	61.3474	Q-STAR	"(gi|364011) (gi|4557325)
113	3133	1: gi|178853 apolipoprotein E 2: gi|364011 apolipoprotein E mutant E3K 3: gi|4557325 apolipoprotein E precursor [Homo sapiens]	36184.8	283	100	14	10	AATVGSLAGQPLQER	74	749.41	1496.81	1496.79	7.21609	LTQ-FT
								LAVYQAGAR	74	474.77	947.525	947.519	7.00144	LTQ-FT
								LGPLVEQGR	72	484.78	967.545	967.545	0.433055	LTQ-FT
								DADDLQKR	62	480.74	959.465	959.467	-1.83539	LTQ-FT
								LQAEAFQAR	57	517.28	1032.55	1032.54	9.92315	LTQ-FT
								VQAAVGTSAAPVPSDNH	55	810.91	1619.81	1619.79	9.35306	LTQ-FT
								AKLEEQAQQIR	40	438.58	1312.72	1312.71	6.32508	LTQ-FT	Oxidation (M)
								AQAWGER	40	409.2	816.385	816.388	-2.90181	LTQ-FT
								LKSWFEPLVEDMQR	37	598.64	1792.9	1792.88	9.15398	LTQ-FT
								QWAGLVEK	35	465.76	929.505	929.497	9.06189	LTQ-FT	"(gi|180620) (gi|338057) (gi|338305) (gi|32891795) (gi|42716297) (gi|42740907) (gi|57997569)
															Oxidation (M)
113	3133	1: gi|178855 apolipoprotein J precursor 2: gi|180620 complement cytolysis inhibitor precursor 3: gi|338057 sulfated glycoprotein-2 4: gi|338305 'SP40,40' 5: gi|32891795 clusterin (complement lysis inhibitor, SP-40,40, sulfated glycoprotein 2, testosterone-repressed pr 6: gi|42716297 clusterin isoform 1 [Homo sapiens] 7: gi|42740907 clusterin isoform 2 [Homo sapiens] 8: gi|57997569 hypothetical pr…	48772.1	80	100	2	2	KYNELLK	60	454.27	906.525	906.517	8.84925	LTQ-FT
								FMETVAEK	47	485.73	969.445	969.448	-2.31575	LTQ-FT	"
114	3151	1: gi|178853 apolipoprotein E	36184.8	270	100	10	10	SELEEQLTPVAEETR	81	865.977	1729.94	1729.84	59.3264	Q-STAR
								WVQTLSEQVQEELLSSQVTQELR	76	910.861	2729.56	2729.39	63.9503	Q-STAR
								AKLEEQAQQIR	70	657.384	1312.75	1312.71	32.4893	Q-STAR
								GEVQAMLGQSTEELR	65	824.451	1646.89	1646.79	57.4	Q-STAR
								SWFEPLVEDMQR	63	768.91	1535.81	1535.71	64.2095	Q-STAR
								SELEEQLTPVAEETR	58	865.976	1729.94	1729.84	57.6245	Q-STAR
								AYKSELEEQLTPVAEETR	56	698.388	2092.14	2092.03	52.6651	Q-STAR	Oxidation (M)
								QQTEWQSGQR	43	624.327	1246.64	1246.57	57.1489	Q-STAR
								LGADMEDVR	42	511.256	1020.5	1020.45	41.2277	Q-STAR
								QWAGLVEK	32	465.778	929.541	929.497	47.1986	Q-STAR	"(gi|180620) (gi|32891795) (gi|42740907) (gi|338057) (gi|42716297)
114	3151	1: gi|178855 apolipoprotein J precursor 2: gi|180620 complement cytolysis inhibitor precursor 3: gi|32891795 clusterin (complement lysis inhibitor, SP-40,40, sulfated glycoprotein 2, testosterone-repressed pr 4: gi|42740907 clusterin isoform 2 [Homo sapiens] 5: gi|338057 sulfated glycoprotein-2 6: gi|42716297 clusterin isoform 1 [Homo sapiens]	48772.1	237	100	9	8	ASSIIDELFQDR	99	697.39	1392.77	1392.69	55.9615	Q-STAR
								KTLLSNLEEAK	76	623.394	1244.77	1244.7	61.5627	Q-STAR
								QQTHMLDVMQDHFSR	70	624.981	1871.92	1871.84	43.1281	Q-STAR
								TLLSNLEEAK	57	559.343	1116.67	1116.6	62.469	Q-STAR
								KTLLSNLEEAK	46	623.393	1244.77	1244.7	59.8418	Q-STAR
								TLLSNLEEAKK	39	623.394	1244.77	1244.7	60.4315	Q-STAR
								KTLLSNLEEAK	38	623.387	1244.76	1244.7	50.413	Q-STAR
								RPHFFFPK	31	359.22	1074.64	1074.58	56.841	Q-STAR	"(gi|13786847) (gi|49259209)
114	3151	1: gi|4557032 lactate dehydrogenase B [Homo sapiens] 2: gi|13786847 Chain A, Human Heart L-Lactate Dehydrogenase H Chain, Ternary Complex With Nadh And Oxamate 3: gi|49259209 Chain A, Human B Lactate Dehydrogenase Complexed With Nad+ And 4- Hydroxy-1,2,5-Oxadiazole-3-Carbox	36615.1	67	100	3	3	SADTLWDIQK	53	588.84	1175.66	1175.58	70.332	Q-STAR
								MVVESAYEVIK	36	634.366	1266.72	1266.65	51.1806	Q-STAR
								FIIPQIVK	34	479.34	956.665	956.606	61.9754	Q-STAR	"(gi|178853) (gi|364011) (gi|4557325)
114	3151	1: gi|178849 apolipoprotein E 2: gi|178853 apolipoprotein E 3: gi|364011 apolipoprotein E mutant E3K 4: gi|4557325 apolipoprotein E precursor [Homo sapiens]	36187.8	222	100	6	6	AATVGSLAGQPLQER	77	749.41	1496.81	1496.79	7.21609	LTQ-FT
								VQAAVGTSAAPVPSDNH	71	810.91	1619.81	1619.79	9.35306	LTQ-FT
								LGPLVEQGR	67	484.78	967.545	967.545	0.433055	LTQ-FT
								LAVYQAGAR	59	474.77	947.525	947.519	7.00144	LTQ-FT
								LQAEAFQAR	49	517.28	1032.55	1032.54	9.92315	LTQ-FT
								AKLEEQAQQIR	35	438.58	1312.72	1312.71	6.32508	LTQ-FT
115	3249	1: gi|178849 apolipoprotein E 2: gi|178853 apolipoprotein E 3: gi|364011 apolipoprotein E mutant E3K 4: gi|4557325 apolipoprotein E precursor [Homo sapiens]	36301.8	187	100	9	8	WVQTLSEQVQEELLSSQVTQELR	68	910.855	2729.54	2729.39	57.1	"(gi|178853) (gi|364011) (gi|4557325)
								AKLEEQAQQIR	67	657.396	1312.78	1312.71	51.9
								SWFEPLVEDMQR	61	768.907	1535.8	1535.71	59.6
								SELEEQLTPVAEETR	52	865.985	1729.95	1729.84	68
								AATVGSLAGQPLQER	47	749.451	1496.89	1496.79	61.8
								QWAGLVEK	41	465.782	929.55	929.497	56.6
								WELALGR	37	422.769	843.524	843.46	76
								SELEEQLTPVAEETR	36	865.985	1729.95	1729.84	68
115	3249	1: gi|178855 apolipoprotein J precursor 2: gi|180620 complement cytolysis inhibitor precursor 3: gi|32891795 clusterin (complement lysis inhibitor, SP-40,40, sulfated glycoprotein 2, testosterone-repressed pr 4:gi| 42740907 clusterin isoform 2 [Homo sapiens] 5: gi|5799759 hypothetical protein [Homo sapiens] 6: gi|338057 sulfated glycoprotein-2 7: gi|42716297 clusterin isoform 1 [Homo sapiens]	48772	145	100	4	4	RPHFFFPK	32	359.225	1074.65	1074.58	72.6798	Q-STAR
								TLLSNLEEAK	31	559.349	1116.68	1116.6	71.825	Q-STAR
								TLLSNLEEAKK	44	623.389	1244.76	1244.7	53.3463	Q-STAR
								KTLLSNLEEAK	45	623.402	1244.79	1244.7	73.8332	Q-STAR	"(gi|178853) (gi|364011) (gi|4557325)
115	3249	1: gi|443295 Chain A, Transthyretin (Formerly Prealbumin) 2: gi|2098255 Chain A, Tertiary Structures Of Three Amyloidogenic Transthyretin Variants And Implications For Amyloid Fibril Formation 3: gi|2098257 Chain A, Tertiary Structures Of Three Amyloidogenic Transthyretin Variants And Implications For Amyloid Fibril Formation 4: gi|3891560 Chain A, Tertiary Structures Of Three Amyloidogenic Trans…	13809.9	113	100	5	4	YTIAALLSPYSYSTTAVVTNPKE	52	830.493	2488.46	2488.27	73.6	"(gi|2098255) (gi|2098257) (gi|3891560) (gi|4507725) (gi|55669575) (gi|62738386) (gi|73535906)
								TSESGELHGLTTEEEFVEGIYK	43	819.104	2454.29	2454.14	59.5
								GSPAINVAVHVFR	42	456.29	1365.85	1365.75	71.4
								YTIAALLSPYSYSTTAVVTNPK	37	787.473	2359.4	2359.23	70.2
116	3118	1: gi|178849 apolipoprotein E 2: gi|178853 apolipoprotein E 3: gi|364011 apolipoprotein E mutant E3K 4: gi|4557325 apolipoprotein E precursor [Homo sapiens]	36187.8	171	100	5	5	WVQTLSEQVQEELLSSQVTQELR	95	910.851	2729.53	2729.39	52.2685	Q-STAR
								SWFEPLVEDMQR	75	768.901	1535.79	1535.71	51.7996	Q-STAR
								SELEEQLTPVAEETR	67	865.979	1729.94	1729.84	61.374	Q-STAR
								QWAGLVEK	41	465.779	929.544	929.497	50.1207	Q-STAR
								AYKSELEEQLTPVAEETR	40	698.391	2092.15	2092.03	56.9499	Q-STAR	"(gi|2098255) (gi|2098257) (gi|3891560) (gi|4507725) (gi|55669575) (gi|62738386) (gi|73535906)
116	3118	1: gi|443295 Chain A, Transthyretin (Formerly Prealbumin) 2: gi|2098255 Chain A, Tertiary Structures Of Three Amyloidogenic Transthyretin Variants And Implications For Amy 3: gi|2098257 Chain A, Tertiary Structures Of Three Amyloidogenic Transthyretin Variants And Implications For Amy 4: gi|3891560 Chain A, Tertiary Structures Of Three Amyloidogenic Transthyretin Variants And Implications For Amy…	13752.9	119	100	16	5	TSESGELHGLTTEEEFVEGIYKVEIDTK	59	785.936	3139.71	3139.51	65.7259	Q-STAR
								YTIAALLSPYSYSTTAVVTNPKE	45	830.474	2488.4	2488.27	50.49	Q-STAR
								AADDTWEPFASGK	43	697.855	1393.69	1393.61	57.1112	Q-STAR
								GSPAINVAVHVFR	35	456.286	1365.84	1365.75	62.5209	Q-STAR	"(gi|178853) (gi|364011) (gi|4557325)
116	3118	1: gi|178849 apolipoprotein E 2: gi|178853 apolipoprotein E 3: gi|364011 apolipoprotein E mutant E3K 4: gi|4557325 apolipoprotein E precursor [Homo sapiens]	36187.8	170	100	5	5	LGPLVEQGR	73	484.78	967.545	967.545	0.433055	LTQ-FT
								LAVYQAGAR	71	474.77	947.525	947.519	7.00144	LTQ-FT
								LQAEAFQAR	48	517.28	1032.55	1032.54	9.92315	LTQ-FT
								AATVGSLAGQPLQER	42	749.41	1496.81	1496.79	7.21609	LTQ-FT
								QWAGLVEK	40	465.76	929.505	929.497	9.06189	LTQ-FT
117	5698	1: gi|178855 apolipoprotein J precursor 2: gi|180620 complement cytolysis inhibitor precursor 3: gi|338057 sulfated glycoprotein-2 4: gi|32891795 clusterin (complement lysis inhibitor, SP-40,40, sulfated glycoprotein 2, testosterone-repressed pr 5: gi|42740907 clusterin isoform 2 [Homo sapiens] 6: gi|57997569 hypothetical protein [Homo sapiens] 7: gi|42716297 clusterin isoform 1 [Homo sapiens]	48772	61	88	1	1	TLLSNLEEAK	23	559.368	1116.72	1116.6	107.111	Q-STAR
								LFDSDPITVTVPVEVSR	40	625.394	1873.16	1872.98	94.1813	Q-STAR	"(gi|40737308) (gi|40737313) (gi|40737318) (gi|40737408) (gi|40737466) (gi|40737468) (gi|40737470) (gi|40737474) (gi|40737478) (gi|40737482) (gi|40737486) (gi|179674) (gi|443671) (gi|2347136) (gi|38649251) (gi|50345296) (gi|57209758) (gi|67190748) (gi|68533033) (gi|1314244)
118	2819	1: gi|40737343 C4B3 [Homo sapiens] 2: gi|40737308 C4B1 [Homo sapiens] 3: gi|40737313 C4B1 [Homo sapiens] 4: gi|40737318 C4B [Homo sapiens] 5: gi|40737408 C4B5 [Homo sapiens] 6: gi|40737466 C4B1 [Homo sapiens] 7: gi|40737468 C4A [Homo sapiens] 8: gi|40737470 C4A [Homo sapiens] 9: gi|40737474 C4A3 [Homo sapiens] 10: gi|40737478 C4A3 [Homo sapiens] 11: gi|40737482 C4A [Homo sapiens] 12: gi|40737486 …	47424.2	182	100	6	6	SFFPENWLWR	61	691.385	1380.75	1380.66	67.48	Q-STAR
								ALEILQEEDLIDEDDIPVR	61	742.442	2224.31	2224.11	87.3639	Q-STAR
								EGAIHREELVYELNPLDHR	60	573.339	2289.33	2289.15	76.9893	Q-STAR	Carbamidomethyl (C)
								GSFEFPVGDAVSK	58	670.374	1338.73	1338.65	65.5872	Q-STAR	Oxidation (M)
								GLCVATPVQLR	42	607.389	1212.76	1212.66	80.5012	Q-STAR
								TLEIPGNSDPNMIPDGDFNSYVR	40	856.474	2566.4	2566.16	91.6188	Q-STAR	"(gi|178855) (gi|180620) (gi|338057) (gi|32891795) (gi|42716297) (gi|42740907)
119	3137	1: gi|364011 apolipoprotein E mutant E3K 2: gi|4557325 apolipoprotein E precursor [Homo sapiens]	36130.8	472	100	16	19	GEVQAMLGQSTEELR	84	824.44	1646.86	1646.79	43.3	Q-STAR	"(gi|4557325)
								AKLEEQAQQIR	84	657.372	1312.73	1312.71	15.4	Q-STAR
								SELEEQLTPVAEETR	72	865.972	1729.93	1729.84	53	Q-STAR
								AATVGSLAGQPLQER	72	749.428	1496.84	1496.79	31.5	Q-STAR
								WVQTLSEQVQEELLSSQVTQELR	70	910.868	2729.58	2729.39	71.9	Q-STAR
								LKSWFEPLVEDMQR	70	593.335	1776.98	1776.89	54.7	Q-STAR
								SWFEPLVEDMQR	63	768.912	1535.81	1535.71	66	Q-STAR
								GEVQAMLGQSTEELR	61	832.432	1662.85	1662.79	36.4	Q-STAR	Oxidation (M)
								QQTEWQSGQR	58	624.321	1246.63	1246.57	47.6	Q-STAR
								GEVQAMLGQSTEELRVR	56	635.03	1902.07	1901.96	54.9	Q-STAR
								QWAGLVEK	51	465.77	929.526	929.497	30.7	Q-STAR
								DRLDEVKEQVAEVR	51	562.655	1684.94	1684.87	40.2	Q-STAR
								AYKSELEEQLTPVAEETR	49	698.396	2092.17	2092.03	63.7	Q-STAR
								LGPLVEQGR	49	484.783	967.551	967.545	6.2	Q-STAR
								SWFEPLVEDMQR	40	776.907	1551.8	1551.7	62.2	Q-STAR	Oxidation (M)
								LGADMEDVCGR	40	619.794	1237.57	1237.51	54.1	Q-STAR	Carbamidomethyl (C); Oxidation (M)
								LEEQAQQIR	34	557.819	1113.62	1113.58	41.8	Q-STAR
119	3137	1: gi|338305 'SP40,40' 2: gi|178855 apolipoprotein J precursor 3: gi|180620 complement cytolysis inhibitor precursor 4: gi|338057 sulfated glycoprotein-2 5: gi|32891795 clusterin (complement lysis inhibitor, SP-40,40, sulfated glycoprotein 2, testosterone-repressed pr 6: gi|42716297 clusterin isoform 1 [Homo sapiens] 7: gi|42740907 clusterin isoform 2 [Homo sapiens]	36712	115	100	3	3	LFDSDPITVTVPVEVSR	78	937.545	1873.08	1872.98	49.049	Q-STAR
								ASSIIDELFQDR	52	697.387	1392.76	1392.69	51.1751	Q-STAR
								VTTVASHTSDSDVPSGVTEVVVK	46	772.11	2313.31	2313.17	59.7302	Q-STAR

## Sheet: unused
	2533	1: gi|3983127 monocyte antigen CD14 precursor [Homo sapiens] 2: gi|4557417 CD14 antigen precursor [Homo sapiens]	40064.8	345	100	9	10	ITGTMPPLPLEATGLALSSLR	100	713.445	2137.31	2137.18	61.2751	"(gi|4557417)
								ITGTMPPLPLEATGLALSSLR	92	718.775	2153.3	2153.18	58.6984	Oxidation (M)
								LTVGAAQVPAQLLVGALR	65	593.064	1776.17	1776.06	60.8729
								AFPALTSLDLSDNPGLGER	63	658.371	1972.09	1971.99	51.8745
								VLSIAQAHSPAFSCEQVR	52	667.372	1999.09	1998.99	50.2613	Carbamidomethyl (C)
								FPAIQNLALR	51	571.87	1141.73	1141.66	56.9784
								NTGMETPTGVCAALAAAGVQPHSLDLSHNSLR	49	823.697	3290.76	3290.58	54.6442	Carbamidomethyl (C); Oxidation (M)
								RLTVGAAQVPAQLLVGALR	40	645.098	1932.27	1932.16	55.7836
								NTGMETPTGVCAALAAAGVQPHSLDLSHNSLR	35	819.7	3274.77	3274.58	57.3111	Carbamidomethyl (C)
	2533	1: gi|20178323 Pigment epithelium-derived factor precursor (PEDF) (Serpin-F1) (EPC-1)	46313.3	174	100	6	6	SSMSPTTNVLLSPLSVATALSALSLGAEQR	74	1006.59	3016.76	3016.57	60.8836	Oxidation (M)"
								LAAAVSNFGYDLYR	69	780.439	1558.86	1558.78	55.3113
								ELLDTVTAPQK	63	607.861	1213.71	1213.66	42.976
								DTDTGALLFIGK	54	625.868	1249.72	1249.66	53.2467
								IAQLPLTGSMSIIFFLPLK	43	702.453	2104.34	2104.2	64.8227	Oxidation (M)
								EIPDEISILLLGVAHFK	36	632.077	1893.21	1893.06	77.8464
	2533	1: gi|4503009 carboxypeptidase E precursor [Homo sapiens] 2: gi|6429043 carboxypeptidase E [Homo sapiens]	53117.1	88	100	3	3	ELLVIELSDNPGVHEPGEPEFK	55	816.785	2447.33	2447.22	44.8827	"(gi|6429043)
								AASQPGELKDWFVGR	45	554.313	1659.92	1659.84	49.0819
								LTASAPGYLAITK	45	653.413	1304.81	1304.73	59.6298
	2669	1: gi|4505529 orosomucoid 2 [Homo sapiens] 2: gi|29170378 alpha-1-acid glycoprotein 2 precursor [Homo sapiens] 3: gi|48145977 ORM2 [Homo sapiens]	23587.6	344	100	6	11	TLMFGSYLDDEKNWGLSFYADKPETTK	101	793.932	3171.7	3171.47	70.7289	Oxidation (M)"(gi|29170378) (gi|48145977)
								TLMFGSYLDDEKNWGLSFYADKPETTK	90	789.936	3155.72	3155.48	74.9239
								EQLGEFYEALDCLCIPR	81	705.048	2112.12	2111.97	74.2237	2 Carbamidomethyl (C)
								TEDTIFLR	68	497.8	993.585	993.513	72.1722
								TEDTIFLR	57	497.797	993.58	993.513	66.9181
								NWGLSFYADKPETTK	44	586.33	1755.97	1755.85	69.7851
								TEDTIFLR	43	497.807	993.6	993.513	87.3547
								SDVMYTDWK	41	572.788	1143.56	1143.49	62.0241
								EHVAHLLFLR	40	412.269	1233.79	1233.7	70.9793
								TEDTIFLR	40	497.792	993.57	993.513	57.5473
								WFYIASAFR	33	580.838	1159.66	1159.58	68.3566
	2669	1: gi|1197209 alpha-1-acid glycoprotein 1 precursor [Homo sapiens] 2: gi|9257232 orosomucoid 1 precursor [Homo sapiens] 3: gi|20070760 Orosomucoid 1 [Homo sapiens]	23351.4	243	100	13	12	EQLGEFYEALDCLR	72	871.966	1741.92	1741.8	68.2559	Carbamidomethyl (C)"(gi|9257232) (gi|20070760)
								TEDTIFLR	68	497.8	993.585	993.513	72.1722
								YVGGQEHFAHLLILR	58	585.031	1752.07	1751.95	70.5712
								TEDTIFLR	57	497.797	993.58	993.513	66.9181
								SDVVYTDWK	51	556.807	1111.6	1111.52	71.925
								SDVVYTDWK	46	556.801	1111.59	1111.52	61.9819
								TYMLAFDVNDEK	45	731.387	1460.76	1460.65	76.0285	Oxidation (M)
								TEDTIFLR	43	497.807	993.6	993.513	87.3547
								TEDTIFLR	40	497.792	993.57	993.513	57.5473
								NWGLSVYADKPETTK	34	570.334	1707.98	1707.85	78.4409
								WFYIASAFR	33	580.838	1159.66	1159.58	68.3566
	2813	1: gi|1197209 alpha-1-acid glycoprotein 1 precursor [Homo sapiens] 2: gi|9257232 orosomucoid 1 precursor [Homo sapiens] 3: gi|20070760 Orosomucoid 1 [Homo sapiens]	23351.4	426	100	17	17	EQLGEFYEALDCLR	93	871.96	1741.91	1741.8	61.9475	Carbamidomethyl (C)"(gi|9257232) (gi|20070760)
								TYMLAFDVNDEK	69	731.392	1460.77	1460.65	81.5795	Oxidation (M)
								TEDTIFLR	68	497.802	993.59	993.513	77.5611
								YVGGQEHFAHLLILR	59	585.031	1752.07	1751.95	70.2287
								TYMLAFDVNDEK	57	723.389	1444.76	1444.65	75.3717
								NWGLSVYADKPETTK	55	570.336	1707.99	1707.85	82.4582
								SDVVYTDWK	51	556.81	1111.61	1111.52	78.2371
								NWGLSVYADKPETTK	51	570.34	1708	1707.85	89.2879
								TEDTIFLR	49	497.796	993.578	993.513	65.678
								SDVVYTDWK	49	556.805	1111.59	1111.52	68.5962
								TYMLAFDVNDEKNWGLSVYADKPETTK	47	784.68	3134.69	3134.49	64.0445
								SDVVYTDWK	47	556.81	1111.61	1111.52	77.8898
								TEDTIFLR	46	497.797	993.58	993.513	67.0006
								TEDTIFLR	44	497.802	993.588	993.513	75.8541
								TYMLAFDVNDEKNWGLSVYADKPETTK	42	788.677	3150.68	3150.49	61.5219	Oxidation (M)
								SDVVYTDWK	41	556.815	1111.61	1111.52	86.3143
								WFYIASAFR	39	580.834	1159.65	1159.58	62.5096
	2813	1: gi|4505529 orosomucoid 2 [Homo sapiens] 2: gi|29170378 alpha-1-acid glycoprotein 2 precursor [Homo sapiens] 3: gi|48145977 ORM2 [Homo sapiens]	23587.6	302	100	6	11	EQLGEFYEALDCLCIPR	78	705.052	2112.13	2111.97	79.8858	2 Carbamidomethyl (C)"(gi|29170378) (gi|48145977)
								TEDTIFLR	68	497.802	993.59	993.513	77.5611
								TLMFGSYLDDEKNWGLSFYADKPETTK	68	793.934	3171.71	3171.47	72.7217	Oxidation (M)
								TLMFGSYLDDEKNWGLSFYADKPETTK	66	789.936	3155.71	3155.48	74.3358
								NWGLSFYADKPETTK	56	586.337	1755.99	1755.85	81.711
								TEDTIFLR	49	497.796	993.578	993.513	65.678
								TEDTIFLR	46	497.797	993.58	993.513	67.0006
								TEDTIFLR	44	497.802	993.588	993.513	75.8541
								WFYIASAFR	39	580.834	1159.65	1159.58	62.5096
								SDVMYTDWK	39	572.798	1143.58	1143.49	80.1178
	2984	1: gi|178855 apolipoprotein J precursor 2: gi|180620 complement cytolysis inhibitor precursor 3: gi|32891795 clusterin (complement lysis inhibitor, SP-40,40, sulfated glycoprotein 2, testosterone-repressed pr 4: gi|42740907 clusterin isoform 2 [Homo sapiens] 5: gi|42716297 clusterin isoform 1 [Homo sapiens]	48772.1	207	100	7	8	ASSIIDELFQDR	81	697.386	1392.76	1392.69	49.8812	"(gi|180620) (gi|32891795) (gi|42740907) (gi|42716297)
								ASSIIDELFQDRFFTR	67	649.042	1944.1	1943.97	66.8322
								YVNKEIQNAVNGVK	67	525.987	1574.94	1574.84	61.9713
								TLLSNLEEAK	66	559.347	1116.68	1116.6	68.4908
								LFDSDPITVTVPVEVSR	51	937.544	1873.07	1872.98	48.214
								KTLLSNLEEAK	35	623.392	1244.77	1244.7	57.0235
								RPHFFFPK	32	359.225	1074.65	1074.58	71.2216
								TLLSNLEEAKK	31	623.398	1244.78	1244.7	67.6654
	2984	1: gi|179665 complement component C3 2: gi|115298678 complement component 3 precursor [Homo sapiens]	187046	199	100	6	6	NNNEKDMALTAFVLISLQEAK	66	789.122	2364.34	2364.2	60.9107	Oxidation (M)"(gi|115298678)
								ILLQGTPVAQMTEDAVDAER	65	725.077	2172.21	2172.07	62.4804	Oxidation (M)
								APSTWLTAYVVK	57	668.413	1334.81	1334.72	66.3718
								QPSSAFAAFVK	52	576.842	1151.67	1151.6	63.0898
								QLYNVEATSYALLALLQLK	45	717.8	2150.38	2150.2	84.0276
								QKPDGVFQEDAPVIHQEMIGGLR	35	645.876	2579.48	2579.28	75.7886	Oxidation (M)
	3006	1: gi|338057 sulfated glycoprotein-2 2: gi|178855 apolipoprotein J precursor 3: gi|180620 complement cytolysis inhibitor precursor 4: gi|32891795 clusterin (complement lysis inhibitor, SP-40,40, sulfated glycoprotein 2, testosterone-repressed pr 5: gi|42740907 clusterin isoform 2 [Homo sapiens] 6: gi|57997569 hypothetical protein [Homo sapiens] 7: gi|42716297 clusterin isoform 1 [Homo sapiens]	45786.5	62	99	2	2	ASSIIDELFQDRFFTR	58	649.049	1944.12	1943.97	77.2706	"(gi|178855) (gi|180620) (gi|32891795) (gi|42740907) (gi|57997569) (gi|42716297)
								TLLSNLEEAK	34	559.342	1116.67	1116.6	59.424
	3186	1: gi|338057 sulfated glycoprotein-2 2: gi|178855 apolipoprotein J precursor 3: gi|180620 complement cytolysis inhibitor precursor 4: gi|32891795 clusterin (complement lysis inhibitor, SP-40,40, sulfated glycoprotein 2, testosterone-repressed pr 5: gi|42740907 clusterin isoform 2 [Homo sapiens] 6: gi|42716297 clusterin isoform 1 [Homo sapiens]	45786.5	192	100	8	9	ASSIIDELFQDR	69	697.388	1392.76	1392.69	52.4188	"(gi|178855) (gi|180620) (gi|32891795) (gi|42740907) (gi|42716297)
								KTLLSNLEEAK	67	623.4	1244.79	1244.7	71.1651
								ASSIIDELFQDRFFTR	65	649.042	1944.1	1943.97	67.0343
								KTLLSNLEEAK	54	623.401	1244.79	1244.7	72.645
								QQTHMLDVMQDHFSR	41	625	1871.98	1871.84	73.775
								TLLSNLEEAKK	40	623.398	1244.78	1244.7	67.929
								TLLSNLEEAK	40	559.347	1116.68	1116.6	68.6484
								EPQDTYHYLPFSLPHR	35	667.371	1999.09	1998.96	66.7077
	3200	1: gi|178855 apolipoprotein J precursor 2: gi|180620 complement cytolysis inhibitor precursor 3: gi|338057 sulfated glycoprotein-2 4: gi|32891795 clusterin (complement lysis inhibitor, SP-40,40, sulfated glycoprotein 2, testosterone-repressed pr 5: gi|42740907 clusterin isoform 2 [Homo sapiens]	48772.1	86	100	6	2	LFDSDPITVTVPVEVSR	79	937.557	1873.1	1872.98	61.8735	"(gi|180620) (gi|338057) (gi|32891795) (gi|42740907)
								ELDESLQVAER	46	644.861	1287.71	1287.63	59.4107
	3200	1: gi|42716297 clusterin isoform 1 [Homo sapiens]	57795.6	86	100	6	2	LFDSDPITVTVPVEVSR	79	937.557	1873.1	1872.98	61.8735
								ELDESLQVAER	46	644.861	1287.71	1287.63	59.4107
	1912	1: gi|179674 complement component C4A 2: gi|443671 complement component C4A 3: gi|2347136 complement component C4 [Homo sapiens] 4: gi|38649251 Complement component 4A (Rodgers blood group) [Homo sapiens] 5: gi|50345296 complement component 4B preproprotein [Homo sapiens] 6: gi|57209758 complement component 4A (Rodgers blood group) [Homo sapiens] 7: gi|67190748 complement component 4A preproprote…	192741	260	100	10	10	LVNGQSHISLSK	71	641.86	1281.71	1281.7	1.08605	"(gi|443671) (gi|2347136) (gi|38649251) (gi|50345296) (gi|57209758) (gi|67190748) (gi|68533033) (gi|1314244)
								LNMGITDLQGLR	69	673.86	1345.71	1345.7	2.30437	Oxidation (M)
								AEFQDALEK	64	525.76	1049.51	1049.5	2.42877
								LELSVDGAK	61	466.26	930.505	930.502	3.52605
								FGLLDEDGKK	60	374.53	1120.57	1120.58	-7.32926
								LVNGQSHISLSK	52	428.24	1281.7	1281.7	-4.59076
								YIYGKPVQGVAYVR	42	538.3	1611.88	1611.88	0.585653
								EMSGSPASGIPVK	38	638.32	1274.63	1274.62	6.15793	Oxidation (M)
								YVLPNFEVK	31	554.81	1107.61	1107.6	8.17807
								FGLLDEDGKK	31	561.3	1120.59	1120.58	8.0878
	1912	1: gi|4505257 moesin [Homo sapiens]	67777.8	137	100	6	5	ISQLEMAR	68	482.25	962.485	962.485	-0.042598	Oxidation (M)"
								AQMVQEDLEK	61	603.79	1205.57	1205.56	4.71067	Oxidation (M)
								ALELEQER	50	494.26	986.505	986.503	2.24328
								QRIDEFESM	44	585.76	1169.51	1169.5	2.72766	Oxidation (M)
	1912	1: gi|179665 complement component C3 2: gi|115298678 complement component 3 precursor [Homo sapiens]	187046	123	100	4	4	TGLQEVEVK	67	501.78	1001.55	1001.54	6.16251	"(gi|115298678)
								QPSSAFAAFVK	57	576.81	1151.61	1151.6	6.93819
								QGALELIK	40	436.27	870.525	870.517	9.21521
								AGDFLEANYMNLQR	38	829.39	1656.77	1656.76	5.37315	Oxidation (M)
	7	1: gi|21071039 carnosinase 1 [Homo sapiens]	56656.1	194	100	9	7	AIHLDLEEYR	59	629.83	1257.65	1257.64	8.05718	"
								HLEDVFSK	57	487.75	973.485	973.487	-1.45251
								HLEDVFSKR	51	377.54	1129.6	1129.59	9.03427
								MMAVAADTLQR	49	619.8	1237.59	1237.58	4.83201	2 Oxidation (M)
								KPAITYGTR	36	503.79	1005.57	1005.56	4.72274
								WNYIEGTK	35	505.75	1009.49	1009.49	-1.40071
								GTVCFYGHLDVQPADR	34	612.29	1833.85	1833.85	0.763968	Carbamidomethyl (C)
	5623	1: gi|178849 apolipoprotein E 2: gi|178853 apolipoprotein E 3: gi|364011 apolipoprotein E mutant E3K 4: gi|4557325 apolipoprotein E precursor [Homo sapiens]	36187.8	54	100	3	2	LGPLVEQGR	54	484.848	967.681	967.545	140.981	"(gi|178853) (gi|364011) (gi|4557325)
								LQAEAFQAR	31	517.335	1032.66	1032.54	116.881
	3150	1: gi|178849 apolipoprotein E 2: gi|364011 apolipoprotein E mutant E3K 3: gi|4557325 apolipoprotein E precursor [Homo sapiens]	36187.8	85	100	7	6	LGADMEDVCGR	66	611.842	1221.67	1221.51	128.348	Carbamidomethyl (C)"(gi|364011) (gi|4557325)
								LGPLVEQGR	49	484.832	967.649	967.545	107.682
								AKLEEQAQQIR	47	657.427	1312.84	1312.71	98.9183
								AATVGSLAGQPLQER	36	749.6	1497.19	1496.79	261.092
								GEVQAMLGQSTEELR	36	824.493	1646.97	1646.79	107.731
	3150	1: gi|178855 apolipoprotein J precursor 2: gi|180620 complement cytolysis inhibitor precursor 3: gi|32891795 clusterin (complement lysis inhibitor, SP-40,40, sulfated glycoprotein 2, testosterone-repressed pr 4: gi|42716297 clusterin isoform 1 [Homo sapiens] 5: gi|42740907 clusterin isoform 2 [Homo sapiens]	48772.1	78	100	3	2	ASSIIDELFQDR	61	697.399	1392.78	1392.69	68.4941	"(gi|180620) (gi|32891795) (gi|42716297) (gi|42740907)
								ELDESLQVAER	56	644.893	1287.77	1287.63	110.043
	3175	1: gi|178849 apolipoprotein E 2: gi|364011 apolipoprotein E mutant E3K 3: gi|4557325 apolipoprotein E precursor [Homo sapiens]	36187.8	186	100	10	10	SELEEQLTPVAEETR	82	866.002	1729.99	1729.84	88.5477	"(gi|364011) (gi|4557325)
								LQAEAFQAR	66	517.332	1032.65	1032.54	111.297
								LGADMEDVCGR	61	611.808	1221.6	1221.51	73.5163	Carbamidomethyl (C)
								LAVYQAGAR	54	474.797	947.58	947.519	64.3766
								LGPLVEQGR	48	484.82	967.625	967.545	82.852
								AKLEEQAQQIR	47	657.406	1312.8	1312.71	66.25
								GEVQAMLGQSTEELR	44	824.487	1646.96	1646.79	100.501
								AATVGSLAGQPLQER	40	749.469	1496.92	1496.79	86.563
								ALMDETMK	35	469.75	937.486	937.425	65.6373
	3175	1: gi|338305 'SP40,40' 2: gi|178855 apolipoprotein J precursor 3: gi|180620 complement cytolysis inhibitor precursor 4: gi|338057 sulfated glycoprotein-2 5: gi|32891795 clusterin (complement lysis inhibitor, SP-40,40, sulfated glycoprotein 2, testosterone-repressed pr 6: gi|42716297 clusterin isoform 1 [Homo sapiens] 7: gi|42740907 clusterin isoform 2 [Homo sapiens]	36712	73	100	3	2	ELDESLQVAER	62	644.89	1287.77	1287.63	104.374	"(gi|178855) (gi|180620) (gi|338057) (gi|32891795) (gi|42716297) (gi|42740907)
								ASSIIDELFQDR	43	697.437	1392.86	1392.69	123.088
	4531	1: gi|181387 cystatin C 2: gi|4503107 cystatin C precursor [Homo sapiens] 3: gi|14278690 Chain A, Human Cystatin C; Dimeric Form With 3d Domain Swapping	15819.1	62	100	2	2	ALDFAVGEYNK	52	613.875	1225.73	1225.6	111.873	"(gi|4503107) (gi|14278690)
								LVGGPMDASVEEEGVRR	35	601.035	1800.08	1799.88	111.202
	2503	1: gi|5802984 UDP-GlcNAc:betaGal beta-1,3-N-acetylglucosaminyltransferase 1 [Homo sapiens]	47088.9	85	100	2	1	TALASGGVLDASGDYR	83	777.1	1552.19	1551.75	278.788	"
	3150	1: gi|178853 apolipoprotein E 2: gi|364011 apolipoprotein E mutant E3K 3: gi|4557325 apolipoprotein E precursor [Homo sapiens]	36184.8	91	100	6	6	AKLEEQAQQIR	71	657.411	1312.81	1312.71	73.915	"(gi|364011) (gi|4557325)
								LGPLVEQGR	45	484.827	967.64	967.545	97.9624
								LQAEAFQAR	44	517.318	1032.62	1032.54	83.4703
								ELQAAQAR	41	443.774	885.534	885.467	76.1214
								AATVGSLAGQPLQER	36	749.472	1496.93	1496.79	89.3944
								SELEEQLTPVAEETR	33	866.014	1730.01	1729.84	101.741
	3150	1: gi|338305 'SP40,40' 2: gi|178855 apolipoprotein J precursor 3: gi|180620 complement cytolysis inhibitor precursor 4: gi|338057 sulfated glycoprotein-2 5: gi|32891795 clusterin (complement lysis inhibitor, SP-40,40, sulfated glycoprotein 2, testosterone-repressed pr 6: gi|42716297 clusterin isoform 1 [Homo sapiens] 7: gi|42740907 clusterin isoform 2 [Homo sapiens]	36712	53	100	2	2	ELDESLQVAER	47	644.865	1287.72	1287.63	65.8628	"(gi|178855) (gi|180620) (gi|338057) (gi|32891795) (gi|42716297) (gi|42740907)
								LFDSDPITVTVPVEVSR	38	937.623	1873.23	1872.98	132.579
[truncated: 120 more rows]
